# Supplementary material for: Molecular mechanism of complement inhibition by the trypanosome receptor ISG65
Source: eLife. 2024 Apr 24;12:RP88960. doi: 10.7554/eLife.88960 (PMC11042801; doi:10.7554/eLife.88960)
Supplement: Figure 2—figure supplement 1—source data 1. [file elife-88960-fig2-figsupp1-data1.xlsx]

## Sheet: biotin-C3b ISG65
Cycle: 2 ISG65WT 5000 nM_X	Cycle: 2 ISG65WT 5000 nM_Y	Fitted Cycle: 2 ISG65WT 5000 n_Y	Cycle: 3 ISG65WT 2500 nM_Y	Fitted Cycle: 3 ISG65WT 2500 n_Y	Cycle: 4 ISG65WT 1250 nM_Y	Fitted Cycle: 4 ISG65WT 1250 n_Y	Cycle: 5 ISG65WT 625 nM_Y	Fitted Cycle: 5 ISG65WT 625 nM_Y	Cycle: 6 ISG65WT 312.5 nM_Y	Fitted Cycle: 6 ISG65WT 312.5 _Y
-59.96	-0.006464	0	-0.928574	0	-1.39431	0	-0.311201	0	-0.288231	0
-58.96	-0.0353701	0	-0.911386	0	-1.39783	0	-0.301045	0	-0.280808	0
-57.96	-0.0256044	0	-0.891854	0	-1.38123	0	-0.320576	0	-0.272995	0
-56.96	-0.0236512	0	-0.882088	0	-1.39099	0	-0.330341	0	-0.272995	0
-55.96	-0.00411999	0	-0.874276	0	-1.37146	0	-0.340107	0	-0.282761	0
-54.96	0.00759888	0	-0.866463	0	-1.35291	0	-0.367451	0	-0.274948	0
-53.96	0.00330174	0	-0.891464	0	-1.35818	0	-0.371748	0	-0.299949	0
-52.96	-0.000213623	0	-0.905525	0	-1.38416	0	-0.394794	0	-0.302292	0
-51.96	-0.013495	0	-0.90201	0	-1.38181	0	-0.378779	0	-0.302683	0
-50.96	-0.0158387	0	-0.893807	0	-1.40076	0	-0.390888	0	-0.314011	0
-49.96	0.00330174	0	-0.871933	0	-1.38943	0	-0.401045	0	-0.311668	0
-48.96	-0.0138856	0	-0.83326	0	-1.33044	0	-0.37917	0	-0.302292	0
-47.96	-0.0158387	0	-0.803963	0	-1.30115	0	-0.37917	0	-0.312058	0
-46.96	0.00369239	0	-0.862557	0	-1.28845	0	-0.37331	0	-0.310105	0
-45.96	0.0325985	0	-0.860214	0	-1.25564	0	-0.342451	0	-0.288231	0
-44.96	0.0622861	0	-0.800057	0	-1.21619	0	-0.322529	0	-0.280808	0
-43.96	0.0833799	0	-0.789901	0	-1.20584	0	-0.301435	0	-0.260887	0
-42.96	0.130645	0	-0.776621	0	-1.20056	0	-0.283467	0	-0.255419	0
-41.96	0.0974426	0	-0.755135	0	-1.18298	0	-0.277607	0	-0.214401	0
-40.96	0.0759581	0	-0.741463	0	-1.22107	0	-0.297138	0	-0.241745	0
-39.96	0.134552	0	-0.739511	0	-1.20837	0	-0.301045	0	-0.249558	0
-38.96	0.154083	0	-0.743416	0	-1.19177	0	-0.289326	0	-0.233933	0
-37.96	0.00291038	0	-0.770761	0	-1.17712	0	-0.261982	0	-0.222215	0
-36.96	3.9094	0	-0.828572	0	-1.26775	0	-0.329952	0	-0.196042	0
-35.96	3.57157	0	3.06145	0	0.0430162	0	0.845503	0	-0.58196	0
-34.96	-2.05992	0	2.02463	0	2.87266	0	0.361829	0	1.62162	0
-33.96	-0.900227	0	-2.48206	0	-1.97722	0	-0.840199	0	-1.04336	0
-32.96	-0.648915	0	-0.536274	0	-0.230592	0	-0.251229	0	-0.292572	0
-31.96	0.195419	0	-0.757988	0	-0.600122	0	-0.274395	0	-0.222881	0
-30.96	-0.0227877	0	0.0684714	0	0.215415	0	0.0145811	0	0.0714697	0
-29.96	-0.0701958	0	-0.102179	0	0.0173439	0	-0.0793091	0	0.106679	0
-28.96	-0.0841393	0	-0.178167	0	0.0039916	0	-0.157469	0	-0.203371	0
-27.96	0.123521	0	-0.133719	0	-0.0200335	0	-0.0999667	0	-0.157908	0
-26.96	0.034022	0	-0.0427297	0	0.0253912	0	-0.0932935	0	-0.0312933	0
-25.96	0.0115047	0	-0.0510731	0	0.00131178	0	-0.107762	0	-0.084013	0
-24.96	0.109568	0	0.0339109	0	0.0221486	0	-0.106496	0	-0.0340289	0
-23.96	0.176345	0	0.022595	0	0.0947906	0	-0.0902642	0	-0.0429186	0
-22.96	0.192362	0	0.0286878	0	0.0977558	0	-0.0836235	0	-0.0495631	0
-21.96	0.176444	0	0.0119563	0	0.089885	0	-0.0113418	0	-0.0166082	0
-20.96	0.185207	0	0.116786	0	0.0815389	0	-0.0654681	0	0.00103641	0
-19.96	0.0884435	0	0.012145	0	0.0234449	0	-0.0355151	0	-0.0256358	0
-18.96	0.0211762	0	-0.00793508	0	-0.00698578	0	-0.0252029	0	-0.0205617	0
-17.96	0.042957	0	-0.0208905	0	-0.00708041	0	-0.02467	0	-0.0171865	0
-16.96	0.0933167	0	-0.00210324	0	0.0153939	0	-0.0250915	0	-0.00684109	0
-15.96	0.0800835	0	0.02949	0	0.0222374	0	-0.0119995	0	-0.0145431	0
-14.96	0.0612702	0	0.0351734	0	0.0277181	0	-0.014482	0	0.0138759	0
-13.96	0.0529888	0	0.0501777	0	0.0420158	0	-0.00643656	0	0.0109092	0
-12.96	0.056753	0	0.027267	0	0.0265635	0	0.0214709	0	0.00745345	0
-11.96	0.0365036	0	0.0250197	0	0.0334995	0	0.00926662	0	0.0295821	0
-10.96	0.00883551	0	0.0158947	0	0.0153987	0	0.0133941	0	0.0242069	0
-9.95996	-0.0107429	0	0.0275851	0	-0.00401947	0	-0.0197761	0	0.029256	0
-8.95996	-0.0119324	0	0.0190849	0	-0.0181389	0	-0.0209656	0	0.00270844	0
-7.95996	-0.0466371	0	-0.00832177	0	-0.0287423	0	-0.0358262	0	0.00123787	0
-6.95996	-0.0534771	0	-0.0276518	0	-0.0412872	0	-0.0137622	0	-0.00488571	0
-5.95996	-0.0676533	0	-0.0462899	0	-0.0541702	0	-0.00676309	0	-0.0118851	0
-4.95996	-0.083166	0	-0.0180469	0	-0.199221	0	0.0166265	0	-0.0605159	0
-3.95996	-0.0111525	0	-0.00857253	0	0.111236	0	0.00965668	0	0.0280982	0
-2.95996	0.378283	0	0.172376	0	0.0629352	0	0.133623	0	0.115529	0
-1.95996	0.146848	0	0.312089	0	0.0184108	0	0.106565	0	0.124226	0
-0.959961	-2.50866	0	-0.206805	0	-0.51014	0	-0.571052	0	0.783692	0
0.0400391	0.132401	0	-1.985	0	-2.00974	0	0.378834	0	-1.2845	0
1.04004	9.76122	22.1465	0.46785	5.2476	0.589188	3.23676	2.09734	2.97277	0.873425	0.666482
2.04004	33.9353	40.1799	12.4069	16.175	6.88526	8.87097	5.58849	5.77319	2.01848	2.12848
3.04004	51.8768	54.8639	23.6996	25.8456	12.8031	14.0691	8.82093	8.41123	3.89381	3.52013
4.04004	65.8781	66.8207	33.8076	34.4039	18.372	18.865	11.6752	10.8963	5.75226	4.8448
5.04004	76.5559	76.5568	42.1123	41.9779	22.9414	23.2898	14.2646	13.2373	7.13591	6.10573
6.04004	84.6519	84.4847	49.0141	48.6807	26.801	27.3721	16.4803	15.4426	8.34627	7.30597
7.04004	91.0447	90.9401	54.8274	54.6126	30.1182	31.1385	18.5334	17.52	9.46	8.44846
8.04004	96.2675	96.1966	59.9795	59.8623	33.5853	34.6134	20.5081	19.477	10.4648	9.53597
9.04004	100.629	100.477	64.627	64.5082	36.6736	37.8194	22.4325	21.3205	11.4864	10.5711
10.04	104.168	103.962	68.7266	68.6197	39.5847	40.7773	24.2036	23.0571	12.5179	11.5565
11.04	107.037	106.8	72.2864	72.2583	42.2598	43.5063	25.9441	24.693	13.4446	12.4944
12.04	109.536	109.111	75.4436	75.4785	44.7613	46.0241	27.5237	26.2341	14.3702	13.3872
13.04	111.504	110.993	78.2833	78.3282	47.0734	48.347	28.917	27.6858	15.2619	14.2371
14.04	113.118	112.525	80.7682	80.8502	49.0753	50.4902	30.2441	29.0534	16.0461	15.046
15.04	114.434	113.772	82.914	83.0822	51.0461	52.4675	31.396	30.3416	16.7612	15.816
16.04	115.594	114.788	84.7968	85.0574	52.6801	54.2918	32.6049	31.5552	17.5143	16.549
17.04	116.661	115.615	86.5279	86.8055	54.2259	55.9749	33.7041	32.6984	18.2442	17.2467
18.04	117.563	116.289	88.0271	88.3524	55.8131	57.5278	34.7714	33.7753	18.9296	17.9108
19.04	118.282	116.838	89.4391	89.7215	57.1631	58.9605	35.639	34.7898	19.557	18.543
20.04	118.888	117.284	90.651	90.9331	58.439	60.2823	36.5721	35.7455	20.0864	19.1447
21.04	119.455	117.648	91.7091	92.0054	59.6529	61.5018	37.4261	36.6457	20.6722	19.7175
22.04	119.932	117.944	92.6707	92.9543	60.7054	62.6269	38.1857	37.4938	21.2545	20.2627
23.04	120.3	118.185	93.6179	93.7941	61.7192	63.665	38.8332	38.2927	21.7374	20.7816
24.04	120.652	118.381	94.4028	94.5373	62.6121	64.6227	39.595	39.0452	22.219	21.2756
25.04	120.921	118.541	95.1013	95.195	63.492	65.5063	40.3089	39.7542	22.6586	21.7459
26.04	121.141	118.671	95.7709	95.7771	64.2739	66.3216	40.8998	40.422	23.0634	22.1935
27.04	121.298	118.777	96.427	96.2922	65.1286	67.0737	41.4976	41.0511	23.5031	22.6195
28.04	121.429	118.864	96.8873	96.7481	65.6354	67.7676	41.894	41.6437	23.8973	23.0251
29.04	121.595	118.934	97.4975	97.1515	66.2563	68.4079	42.5004	42.202	24.1615	23.4111
30.04	121.656	118.991	97.8711	97.5085	66.9378	68.9986	42.9096	42.7279	24.5722	23.7786
31.04	121.763	119.038	98.2845	97.8245	67.4662	69.5435	43.3562	43.2233	24.894	24.1284
32.04	121.825	119.076	98.686	98.1042	68.034	70.0463	43.714	43.69	25.1895	24.4613
33.04	121.925	119.107	98.9124	98.3516	68.5081	70.5102	44.2423	44.1296	25.5091	24.7782
34.04	121.905	119.132	99.2829	98.5706	68.9282	70.9382	44.5412	44.5438	25.7234	25.0799
35.04	121.846	119.152	99.5307	98.7645	69.4045	71.3331	44.9299	44.9339	26.0246	25.3671
36.04	121.886	119.169	99.7255	98.936	69.6478	71.6974	45.1569	45.3014	26.3187	25.6404
37.04	121.954	119.183	100.083	99.0878	69.9891	72.0335	45.3378	45.6476	26.4826	25.9006
38.04	121.904	119.194	100.185	99.2221	70.3232	72.3436	45.7686	45.9737	26.6691	26.1482
39.04	121.84	119.203	100.438	99.341	70.6703	72.6297	46.0228	46.281	26.9415	26.384
40.04	121.853	119.21	100.544	99.4462	70.8679	72.8937	46.2954	46.5704	27.1293	26.6084
41.04	121.861	119.216	100.752	99.5393	71.1454	73.1372	46.5406	46.843	27.2908	26.822
42.04	121.858	119.221	100.901	99.6217	71.4219	73.3619	46.8015	47.0998	27.4696	27.0253
43.04	121.788	119.225	101.093	99.6947	71.6932	73.5692	47.04	47.3417	27.6704	27.2188
44.04	121.759	119.228	101.196	99.7592	71.8875	73.7604	47.1887	47.5696	27.8063	27.4031
45.04	121.738	119.231	101.277	99.8163	72.1116	73.9369	47.4034	47.7843	27.9905	27.5784
46.04	121.683	119.233	101.365	99.8669	72.3111	74.0997	47.5895	47.9866	28.1258	27.7453
47.04	121.61	119.235	101.477	99.9116	72.5207	74.2499	47.7709	48.1771	28.2319	27.9042
48.04	121.525	119.236	101.559	99.9512	72.6732	74.3885	47.9251	48.3565	28.3586	28.0555
49.04	121.456	119.237	101.619	99.9862	72.81	74.5163	48.093	48.5256	28.518	28.1994
50.04	121.429	119.238	101.712	100.017	72.967	74.6343	48.2716	48.6849	28.6743	28.3365
51.04	121.397	119.239	101.789	100.045	73.154	74.7431	48.421	48.8349	28.7846	28.4669
52.04	121.387	119.239	101.883	100.069	73.3447	74.8435	48.6189	48.9762	28.9476	28.5911
53.04	121.326	119.24	101.969	100.09	73.4968	74.9362	48.8185	49.1094	29.0769	28.7092
54.04	121.236	119.24	102.048	100.109	73.6269	75.0216	48.9354	49.2348	29.1526	28.8217
55.04	121.149	119.241	102.089	100.126	73.7579	75.1005	48.9924	49.3529	29.21	28.9288
56.04	121.101	119.241	102.129	100.141	73.8481	75.1732	49.0814	49.4642	29.3023	29.0308
57.04	121.052	119.241	102.163	100.154	73.9447	75.2404	49.1676	49.5691	29.4063	29.1278
58.04	121.01	119.241	102.183	100.166	74.0597	75.3023	49.3501	49.6678	29.5149	29.2202
59.04	120.932	119.242	102.231	100.176	74.1706	75.3594	49.4514	49.7609	29.6133	29.3081
60.04	120.878	119.242	102.308	100.185	74.2865	75.4121	49.5114	49.8485	29.6677	29.3917
61.04	120.789	119.242	102.351	100.194	74.3952	75.4608	49.5942	49.9311	29.7355	29.4714
62.04	120.755	119.242	102.381	100.201	74.4842	75.5056	49.6881	50.0088	29.8078	29.5472
63.04	120.722	119.242	102.41	100.207	74.5587	75.547	49.7578	50.0821	29.8892	29.6194
64.04	120.602	119.242	102.402	100.213	74.5923	75.5852	49.742	50.1511	29.9504	29.6881
65.04	120.396	119.242	102.34	100.218	74.5619	75.6205	49.8388	50.2161	29.9288	29.7535
66.04	120.224	119.242	102.292	100.222	74.5448	75.653	50.1399	50.2774	29.9204	29.8157
67.04	120.103	119.242	102.279	100.226	74.5296	75.683	50.23	50.3351	29.9592	29.875
68.04	119.98	119.242	102.262	100.229	74.5576	75.7106	50.277	50.3894	30.0168	29.9314
69.04	119.848	119.242	102.258	100.232	74.6134	75.7362	50.2996	50.4406	30.1133	29.9851
70.04	119.713	119.242	102.24	100.235	74.6463	75.7597	50.3116	50.4888	30.1931	30.0362
71.04	119.599	119.242	102.199	100.237	74.6672	75.7815	50.2953	50.5343	30.2616	30.0848
72.04	119.536	119.242	102.171	100.24	74.6348	75.8015	50.3333	50.5771	30.3118	30.1311
73.04	119.462	119.242	102.128	100.241	74.6232	75.82	50.3644	50.6174	30.3661	30.1752
74.04	119.378	119.242	102.064	100.243	74.6363	75.8371	50.3786	50.6554	30.4238	30.2172
75.04	119.295	119.242	101.996	100.245	74.6199	75.8528	50.3515	50.6911	30.4622	30.2571
76.04	119.214	119.242	101.961	100.246	74.6161	75.8674	50.3123	50.7248	30.5124	30.2951
77.04	119.122	119.242	101.964	100.247	74.5975	75.8808	50.3145	50.7566	30.549	30.3313
78.04	119.04	119.242	101.949	100.248	74.613	75.8931	50.3146	50.7865	30.5738	30.3657
79.04	118.947	119.242	101.911	100.249	74.6089	75.9045	50.3036	50.8147	30.5883	30.3985
80.04	118.889	119.242	101.878	100.25	74.6246	75.9151	50.3107	50.8412	30.6008	30.4297
81.04	118.828	119.242	101.871	100.25	74.6051	75.9248	50.2838	50.8662	30.6526	30.4594
82.04	118.787	119.242	101.843	100.251	74.579	75.9337	50.2758	50.8898	30.6588	30.4877
83.04	118.732	119.242	101.82	100.252	74.5819	75.942	50.2792	50.912	30.6733	30.5146
84.04	118.694	119.242	101.825	100.252	74.6037	75.9496	50.2986	50.9329	30.6898	30.5402
85.04	118.628	119.242	101.831	100.252	74.6519	75.9567	50.3076	50.9525	30.6936	30.5646
86.04	118.564	119.242	101.802	100.253	74.6668	75.9632	50.2891	50.9711	30.7137	30.5878
87.04	118.538	119.242	101.785	100.253	74.7041	75.9691	50.3128	50.9886	30.7297	30.6099
88.04	118.53	119.242	101.77	100.253	74.7398	75.9747	50.3555	51.005	30.7809	30.631
89.04	118.495	119.242	101.778	100.254	74.7624	75.9798	50.3493	51.0205	30.8239	30.651
90.04	118.457	119.242	101.729	100.254	74.726	75.9845	50.3142	51.0351	30.8239	30.6701
91.04	118.416	119.242	101.703	100.254	74.6926	75.9888	50.2851	51.0489	30.8094	30.6882
92.04	118.358	119.242	101.7	100.254	74.6649	75.9928	50.2583	51.0619	30.7882	30.7055
93.04	118.3	119.242	101.669	100.255	74.6185	75.9965	50.228	51.0741	30.7432	30.7219
94.04	118.24	119.242	101.616	100.255	74.5802	75.9999	50.2087	51.0856	30.7041	30.7375
95.04	118.195	119.242	101.58	100.255	74.5857	76.0031	50.1771	51.0964	30.6999	30.7524
96.04	118.191	119.242	101.558	100.255	74.6035	76.006	50.1647	51.1066	30.6957	30.7666
97.04	118.201	119.242	101.549	100.255	74.6377	76.0086	50.1646	51.1162	30.711	30.7801
98.04	118.169	119.242	101.54	100.255	74.6392	76.0111	50.1343	51.1253	30.7329	30.7929
99.04	118.128	119.242	101.519	100.255	74.6051	76.0134	50.0968	51.1338	30.7114	30.8052
100.04	118.108	119.242	101.496	100.255	74.5381	76.0155	50.0588	51.1418	30.7018	30.8168
101.04	118.104	119.242	101.497	100.255	74.4915	76.0174	50.0379	51.1494	30.7086	30.8279
102.04	118.123	119.242	101.559	100.255	74.4552	76.0192	50.1453	51.1565	30.7409	30.8384
103.04	117.949	119.242	101.44	100.255	74.2475	76.0209	49.885	51.1633	30.6045	30.8485
104.04	118.053	119.242	101.378	100.255	74.4297	76.0224	50.1839	51.1696	30.6419	30.858
105.04	117.971	119.242	101.333	100.255	74.29	76.0238	50.0266	51.1756	30.7	30.8671
106.04	117.967	119.242	101.328	100.256	74.2373	76.0251	49.8805	51.1812	30.5648	30.8758
107.04	117.962	119.242	101.279	100.256	74.1746	76.0263	49.8301	51.1865	30.5076	30.884
108.04	117.983	119.242	101.25	100.256	74.1624	76.0274	49.8108	51.1914	30.5146	30.8919
109.04	118.059	119.242	101.215	100.256	74.133	76.0284	49.7818	51.1961	30.509	30.8993
110.04	118.089	119.242	101.204	100.256	74.0726	76.0294	49.754	51.2006	30.4618	30.9064
111.04	118.1	119.242	101.174	100.256	74.0301	76.0302	49.6776	51.2047	30.4644	30.9132
112.04	118.115	119.242	101.152	100.256	73.9607	76.031	49.6255	51.2087	30.4247	30.9196
113.04	118.155	119.242	101.137	100.256	73.9066	76.0318	49.5983	51.2124	30.3556	30.9258
114.04	118.171	119.242	101.142	100.256	73.8729	76.0324	49.5621	51.2158	30.3118	30.9316
115.04	118.144	119.242	101.087	100.256	73.8172	76.0331	49.5088	51.2191	30.2755	30.9372
116.04	118.113	119.242	101.013	100.256	73.7721	76.0336	49.4781	51.2222	30.2682	30.9424
117.04	118.005	119.242	100.958	100.256	73.7485	76.0342	49.436	51.2251	30.2568	30.9475
118.04	118.058	119.242	100.895	100.256	73.7536	76.0347	49.4531	51.2279	30.2281	30.9523
119.04	118.825	119.242	101.118	100.256	73.9339	76.0351	50.1308	51.2305	30.3545	30.9568
120.04	122.626	119.242	100.059	100.256	72.4765	76.0355	48.026	51.2329	29.3682	30.9612
121.04	112.418	114.692	102.384	98.5539	74.3442	74.4547	48.3851	49.3928	30.6177	30.557
122.04	109.188	110.315	95.058	94.7928	69.374	71.6133	45.7008	47.5078	28.5142	29.3908
123.04	104.162	106.105	91.4716	91.1753	66.5662	68.8803	43.7838	45.6948	27.5714	28.2692
124.04	99.4012	102.056	87.3961	87.6958	63.6758	66.2517	41.9531	43.951	26.4123	27.1904
125.04	94.9467	98.1608	83.7564	84.3491	60.9097	63.7233	40.1803	42.2737	25.3345	26.1527
126.04	90.619	94.4147	80.0482	81.1301	58.3754	61.2915	38.5252	40.6604	24.2978	25.1547
127.04	86.6311	90.8116	76.6238	78.0339	55.9638	58.9524	37.0081	39.1087	23.3442	24.1947
128.04	82.872	87.346	73.4859	75.0559	53.7052	56.7026	35.4775	37.6162	22.4577	23.2713
129.04	79.2423	84.0126	70.3147	72.1916	51.5362	54.5387	34.1638	36.1807	21.5464	22.3833
130.04	75.9001	80.8065	67.5085	69.4366	49.4103	52.4573	32.6776	34.7999	20.7202	21.529
131.04	72.4914	77.7227	64.7204	66.7867	47.3504	50.4554	31.325	33.4718	19.8788	20.7074
132.04	69.3922	74.7566	61.9756	64.2379	45.5549	48.5299	30.0764	32.1945	19.178	19.9172
133.04	66.5303	71.9036	59.5199	61.7864	43.7335	46.6779	28.9621	30.9658	18.5211	19.1571
134.04	63.7802	69.1596	57.1661	59.4285	42.1107	44.8965	27.9945	29.7841	17.8991	18.426
135.04	61.1046	66.5203	54.9898	57.1605	40.4611	43.1832	26.8938	28.6475	17.2937	17.7228
136.04	58.5211	63.9817	52.869	54.9791	38.8991	41.5352	25.9001	27.5542	16.7034	17.0465
137.04	56	61.54	50.6415	52.881	37.3793	39.9501	24.9021	26.5027	16.0498	16.3959
138.04	53.769	59.1914	48.6703	50.8629	36.0139	38.4255	24.0777	25.4912	15.5689	15.7702
139.04	51.4857	56.9325	46.8539	48.9218	34.7289	36.959	23.1539	24.5184	15.0747	15.1684
140.04	49.4453	54.7598	44.9923	47.0548	33.4149	35.5486	22.3411	23.5827	14.5394	14.5895
141.04	47.4815	52.67	43.3328	45.2591	32.1449	34.192	21.6177	22.6828	14.0844	14.0327
142.04	45.4623	50.66	41.7184	43.5319	31.025	32.8871	20.9399	21.8171	13.6349	13.4972
143.04	43.7357	48.7267	40.1922	41.8706	29.9836	31.632	20.2488	20.9845	13.1889	12.9821
144.04	42.0203	46.8671	38.6741	40.2727	28.9925	30.4249	19.5681	20.1837	12.823	12.4867
145.04	40.3314	45.0786	37.2289	38.7358	27.9832	29.2638	18.928	19.4134	12.4052	12.0102
146.04	38.767	43.3582	35.8595	37.2575	27.0131	28.147	18.179	18.6726	12.0358	11.5518
147.04	37.2076	41.7036	34.5739	35.8357	25.9896	27.0728	17.5985	17.96	11.6685	11.111
148.04	35.6875	40.1121	33.356	34.4681	25.1787	26.0397	17.1014	17.2746	11.346	10.6869
149.04	34.3358	38.5813	32.162	33.1527	24.3369	25.0459	16.5556	16.6153	10.9949	10.2791
150.04	32.9864	37.1089	31.0359	31.8875	23.5705	24.0901	16.0718	15.9812	10.7251	9.88682
151.04	31.7081	35.6927	30.0463	30.6706	22.8323	23.1707	15.5713	15.3713	10.4362	9.50951
152.04	30.51	34.3306	28.9305	29.5001	22.0764	22.2865	15.1039	14.7847	10.1622	9.1466
153.04	29.2224	33.0204	27.9915	28.3743	21.3653	21.436	14.677	14.2205	9.8963	8.79755
154.04	28.1708	31.7603	27.0215	27.2915	20.6844	20.6179	14.2593	13.6778	9.65396	8.46181
155.04	27.0906	30.5482	26.0806	26.2499	20.039	19.8311	13.8197	13.1558	9.45427	8.13888
156.04	26.1017	29.3824	25.2295	25.2482	19.3952	19.0743	13.4354	12.6538	9.20646	7.82828
157.04	25.1544	28.2611	24.402	24.2846	18.8427	18.3463	13.0797	12.1709	8.96576	7.52953
158.04	24.2404	27.1826	23.6656	23.3579	18.3492	17.6462	12.7293	11.7064	8.79466	7.24218
159.04	23.2669	26.1452	22.9321	22.4665	17.7504	16.9728	12.4503	11.2596	8.62638	6.9658
160.04	22.3681	25.1475	22.1069	21.6091	17.3076	16.325	12.1168	10.8299	8.43521	6.69997
161.04	21.5935	24.1878	21.4206	20.7844	16.7784	15.702	11.7914	10.4166	8.22779	6.44428
162.04	20.7781	23.2647	20.7533	19.9912	16.3667	15.1028	11.5072	10.0191	8.02296	6.19835
163.04	20.0072	22.3769	20.1241	19.2283	15.9132	14.5264	11.1708	9.63676	7.83488	5.9618
164.04	19.1699	21.5229	19.4583	18.4945	15.4598	13.9721	10.8191	9.26899	7.65944	5.73428
165.04	18.4731	20.7015	18.8317	17.7887	14.9895	13.4389	10.5867	8.91526	7.50802	5.51545
166.04	17.8146	19.9115	18.2993	17.1098	14.5496	12.926	10.3284	8.57503	7.3381	5.30496
167.04	17.1123	19.1516	17.7074	16.4569	14.199	12.4327	10.0884	8.24778	7.21529	5.10251
168.04	16.5182	18.4207	17.1988	15.8288	13.8026	11.9582	9.85052	7.93303	7.06255	4.90778
169.04	15.9369	17.7177	16.7184	15.2248	13.4671	11.5019	9.5863	7.63028	6.91419	4.72049
170.04	15.3524	17.0416	16.1766	14.6438	13.0954	11.0629	9.36763	7.33909	6.77943	4.54034
171.04	14.8407	16.3912	15.7563	14.0849	12.7725	10.6407	9.16521	7.05901	6.6599	4.36707
172.04	14.2488	15.7657	15.2845	13.5474	12.4338	10.2347	8.95687	6.78962	6.51785	4.20041
173.04	13.7381	15.164	14.8099	13.0304	12.1223	9.84408	8.77317	6.53051	6.35068	4.04011
174.04	13.2546	14.5853	14.4279	12.5331	11.8156	9.4684	8.59519	6.28128	6.24163	3.88593
175.04	12.7546	14.0287	13.9967	12.0548	11.5588	9.10706	8.40208	6.04157	6.13873	3.73763
176.04	12.3028	13.4933	13.6379	11.5948	11.2695	8.75951	8.20669	5.81101	6.04153	3.59499
177.04	11.9065	12.9784	13.2772	11.1523	11.028	8.42523	8.05919	5.58925	5.96364	3.4578
178.04	11.4931	12.4831	12.9093	10.7267	10.7833	8.1037	7.90739	5.37595	5.87005	3.32584
179.04	11.0974	12.0067	12.5499	10.3173	10.5256	7.79444	7.73841	5.17078	5.79021	3.19892
180.04	10.7495	11.5485	12.2494	9.92358	10.2946	7.49698	7.60794	4.97345	5.6906	3.07684
181.04	10.3714	11.1078	11.9395	9.54487	10.1037	7.21087	7.46989	4.78365	5.59974	2.95942
182.04	9.92133	10.6839	11.5918	9.18061	9.89977	6.93569	7.31105	4.6011	5.48757	2.84648
183.04	9.56722	10.2762	11.3177	8.83025	9.64652	6.671	7.15928	4.4255	5.38613	2.73785
184.04	9.22204	9.884	11.0077	8.49327	9.43208	6.41642	7.03613	4.25662	5.29843	2.63336
185.04	8.85324	9.50679	10.6836	8.16914	9.26359	6.17155	6.89335	4.09417	5.23418	2.53287
186.04	8.55352	9.14399	10.4525	7.85738	9.0597	5.93603	6.77488	3.93793	5.16663	2.43621
187.04	8.30855	8.79503	10.1827	7.55752	8.87742	5.70949	6.64241	3.78764	5.08629	2.34323
188.04	7.98213	8.45939	9.89807	7.26911	8.69459	5.4916	6.54138	3.6431	4.99427	2.25381
189.04	7.68385	8.13655	9.68619	6.9917	8.52139	5.28203	6.45411	3.50407	4.94599	2.1678
190.04	7.41782	7.82604	9.48816	6.72488	8.35915	5.08045	6.33527	3.37034	4.87858	2.08507
191.04	7.18082	7.52738	9.27274	6.46824	8.1768	4.88657	6.24022	3.24172	4.83183	2.0055
192.04	6.93891	7.24011	9.05191	6.22139	8.02329	4.70008	6.15206	3.11801	4.77069	1.92896
193.04	6.6884	6.96381	8.80274	5.98397	7.8677	4.52072	6.06796	2.99902	4.70097	1.85535
194.04	6.48751	6.69805	8.63293	5.7556	7.69212	4.34819	5.97964	2.88457	4.60804	1.78454
195.04	6.24722	6.44244	8.48532	5.53595	7.54008	4.18225	5.87881	2.77448	4.5459	1.71644
196.04	5.99258	6.19657	8.28605	5.32469	7.39973	4.02265	5.78269	2.6686	4.49484	1.65094
197.04	5.76996	5.9601	8.05938	5.12148	7.25774	3.86913	5.6871	2.56676	4.42707	1.58793
198.04	5.5686	5.73264	7.83895	4.92603	7.12712	3.72148	5.59855	2.46881	4.3746	1.52733
199.04	5.3273	5.51387	7.65555	4.73804	6.99457	3.57945	5.49913	2.37459	4.29597	1.46904
200.04	5.11907	5.30345	7.50449	4.55722	6.87603	3.44285	5.41699	2.28397	4.25616	1.41298
201.04	4.98994	5.10105	7.34112	4.38331	6.75346	3.31146	5.33482	2.19681	4.21185	1.35906
202.04	4.83268	4.90638	7.16979	4.21603	6.63694	3.18509	5.23685	2.11297	4.16138	1.30719
203.04	4.6701	4.71914	7.02026	4.05513	6.52229	3.06354	5.18411	2.03233	4.1231	1.25731
204.04	4.51574	4.53904	6.90985	3.90038	6.44016	2.94662	5.1328	1.95477	4.10129	1.20932
205.04	4.33774	4.36582	6.75793	3.75153	6.34778	2.83417	5.06386	1.88017	4.06671	1.16317
206.04	4.12721	4.19921	6.64956	3.60836	6.24444	2.72601	4.98732	1.80842	4.02224	1.11878
207.04	3.95057	4.03896	6.46721	3.47066	6.14057	2.62198	4.90396	1.73941	3.95716	1.07609
208.04	3.80051	3.88482	6.29727	3.33821	6.04328	2.52192	4.85983	1.67303	3.92628	1.03502
209.04	3.70282	3.73656	6.16566	3.21081	5.96134	2.42568	4.79644	1.60918	3.89749	0.995522
210.04	3.59377	3.59397	6.06377	3.08828	5.88874	2.33311	4.76091	1.54777	3.87442	0.95753
211.04	3.46502	3.45681	5.95073	2.97042	5.83284	2.24407	4.70755	1.4887	3.86099	0.920988
212.04	3.3505	3.32489	5.85157	2.85706	5.75735	2.15843	4.65343	1.43189	3.84347	0.885841
213.04	3.23461	3.198	5.76152	2.74803	5.71227	2.07606	4.6041	1.37724	3.82374	0.852035
214.04	3.13486	3.07596	5.66135	2.64316	5.60971	1.99683	4.57192	1.32468	3.79036	0.819519
215.04	3.03815	2.95857	5.56901	2.54229	5.53174	1.92062	4.51583	1.27413	3.76669	0.788244
216.04	2.92955	2.84566	5.47846	2.44526	5.44955	1.84733	4.46146	1.22551	3.71646	0.758162
217.04	2.7969	2.73707	5.36799	2.35195	5.35983	1.77683	4.39685	1.17874	3.67646	0.729229
218.04	2.69901	2.63261	5.28393	2.26219	5.28069	1.70902	4.32708	1.13375	3.61911	0.701399
219.04	2.58307	2.53214	5.1937	2.17586	5.22417	1.6438	4.28013	1.09049	3.58404	0.674632
220.04	2.45104	2.43551	5.10065	2.09282	5.16436	1.58107	4.22442	1.04887	3.53826	0.648886
221.04	2.34181	2.34256	4.9958	2.01295	5.08366	1.52073	4.17411	1.00884	3.47279	0.624123
222.04	2.25744	2.25317	4.9119	1.93613	5.01612	1.46269	4.1452	0.970343	3.43622	0.600305
223.04	2.15361	2.16718	4.83596	1.86225	4.94701	1.40687	4.08208	0.933312	3.39974	0.577395
224.04	2.07174	2.08447	4.74487	1.79118	4.86897	1.35318	4.05091	0.897694	3.36755	0.55536
225.04	1.98963	2.00492	4.67651	1.72282	4.80198	1.30154	4.01302	0.863436	3.32661	0.534166
226.04	1.89322	1.92841	4.59479	1.65707	4.7667	1.25187	3.96544	0.830485	3.30544	0.513781
227.04	1.84439	1.85482	4.51947	1.59384	4.71233	1.2041	3.93645	0.798791	3.28716	0.494174
228.04	1.77908	1.78403	4.46049	1.53301	4.64545	1.15815	3.88919	0.768307	3.25435	0.475315
229.04	1.74924	1.71595	4.40549	1.47451	4.61041	1.11395	3.86598	0.738986	3.24161	0.457176
230.04	1.68541	1.65046	4.36275	1.41824	4.57874	1.07144	3.84474	0.710784	3.23513	0.439728
231.04	1.60721	1.58748	4.3151	1.36411	4.5717	1.03055	3.79771	0.683659	3.22505	0.422947
232.04	1.52557	1.5269	4.24955	1.31205	4.49155	0.991219	3.75677	0.657569	3.19888	0.406806
233.04	1.45869	1.46862	4.17932	1.26198	4.45151	0.953391	3.7438	0.632474	3.18099	0.391282
234.04	1.39487	1.41258	4.11901	1.21382	4.39424	0.917007	3.7177	0.608337	3.16474	0.376349
235.04	1.33268	1.35867	4.03424	1.1675	4.31233	0.882012	3.67598	0.585121	3.13864	0.361987
236.04	1.27283	1.30682	3.97502	1.12294	4.26225	0.848352	3.65239	0.562791	3.12005	0.348172
237.04	1.21854	1.25695	3.91479	1.08009	4.20725	0.815976	3.59505	0.541314	3.0781	0.334885
238.04	1.15947	1.20898	3.86916	1.03887	4.18042	0.784836	3.55239	0.520656	3.05013	0.322105
239.04	1.10299	1.16284	3.81127	0.999224	4.12983	0.754885	3.52388	0.500786	3.03325	0.309812
240.04	1.10171	1.11846	3.7313	0.96109	4.10031	0.726076	3.52509	0.481675	3.01703	0.297989
241.04	1.03172	1.07578	3.70761	0.924413	4.09352	0.698367	3.49839	0.463293	3.00139	0.286617

## Sheet: biotin-C3d ISG65
Cycle: 2 ISG65WT 5000 nM_X	Cycle: 2 ISG65WT 5000 nM_Y	Fitted Cycle: 2 ISG65WT 5000 n_Y	Cycle: 3 ISG65WT 2500 nM_Y	Fitted Cycle: 3 ISG65WT 2500 n_Y	Cycle: 4 ISG65WT 1250 nM_Y	Fitted Cycle: 4 ISG65WT 1250 n_Y	Cycle: 5 ISG65WT 625 nM_Y	Fitted Cycle: 5 ISG65WT 625 nM_Y	Cycle: 6 ISG65WT 312.5 nM_Y	Fitted Cycle: 6 ISG65WT 312.5 _Y
-59.88	-2.9588	0	0.298767	0	1.0907	0	1.55133	0	0.434692	0
-58.88	-2.94122	0	0.330016	0	1.08386	0	1.55914	0	0.436645	0
-57.88	-2.92169	0	0.339782	0	1.11316	0	1.57867	0	0.448363	0
-56.88	-2.89865	0	0.369469	0	1.13328	0	1.58805	0	0.448754	0
-55.88	-2.86896	0	0.400329	0	1.15417	0	1.61774	0	0.450316	0
-54.88	-2.83224	0	0.433921	0	1.21921	0	1.64469	0	0.47219	0
-53.88	-2.81232	0	0.462828	0	1.26648	0	1.66656	0	0.501097	0
-52.88	-2.78888	0	0.480407	0	1.28503	0	1.67633	0	0.518676	0
-51.88	-2.78302	0	0.511656	0	1.30554	0	1.69586	0	0.549925	0
-50.88	-2.73263	0	0.512047	0	1.32761	0	1.70719	0	0.579613	0
-49.88	-2.68146	0	0.550719	0	1.3241	0	1.71735	0	0.598754	0
-48.88	-2.62911	0	0.580407	0	1.34421	0	1.70914	0	0.60891	0
-47.88	-2.58146	0	0.593297	0	1.36746	0	1.73531	0	0.612035	0
-46.88	-2.5588	0	0.60775	0	1.36374	0	1.75602	0	0.626488	0
-45.88	-2.56427	0	0.624939	0	1.37585	0	1.75446	0	0.622193	0
-44.88	-2.55841	0	0.578063	0	1.39148	0	1.7486	0	0.616333	0
-43.88	-2.5756	0	0.564002	0	1.38503	0	1.75289	0	0.621802	0
-42.88	-2.58029	0	0.578454	0	1.40281	0	1.7775	0	0.606957	0
-41.88	-2.57599	0	0.607361	0	1.42761	0	1.76227	0	0.643677	0
-40.88	-2.54904	0	0.619469	0	1.42429	0	1.76969	0	0.638207	0
-39.88	-2.50958	0	0.652282	0	1.44519	0	1.80914	0	0.659301	0
-38.88	-2.51349	0	0.691344	0	1.46765	0	1.82672	0	0.680785	0
-37.88	-1.18555	0	0.686646	0	1.48914	0	1.82281	0	0.672974	0
-36.88	-1.54543	0	0.530054	0	1.464	0	1.51188	0	0.695581	0
-35.88	-2.57792	0	-0.951517	0	0.878408	0	0.388692	0	0.69985	0
-34.88	-1.45353	0	-1.49015	0	-0.532267	0	-0.0806068	0	-0.234353	0
-33.88	-1.19759	0	-0.427096	0	0.254585	0	0.102821	0	0.211759	0
-32.88	-1.31567	0	-0.486877	0	0.139313	0	0.0651857	0	0.134705	0
-31.88	-1.28165	0	-0.486719	0	0.0674071	0	0.0351805	0	0.0878655	0
-30.88	-1.29537	0	-0.465125	0	0.00745219	0	0.0397703	0	0.068444	0
-29.88	-1.36978	0	-0.444435	0	-0.0861148	0	0.0322019	0	0.0658193	0
-28.88	-1.33351	0	-0.39928	0	-0.237714	0	0.0602904	0	0.0444452	0
-27.88	-1.24999	0	-0.394178	0	-0.130725	0	0.0703245	0	0.0362418	0
-26.88	-1.21464	0	-0.375757	0	-0.114325	0	0.0616698	0	0.0318353	0
-25.88	-1.18823	0	-0.361451	0	-0.141174	0	0.0555419	0	0.0432733	0
-24.88	-1.19985	0	-0.396094	0	-0.174341	0	0.045935	0	0.0332884	0
-23.88	-1.2064	0	-0.458399	0	-0.208594	0	0.0332274	0	0.0166987	0
-22.88	-1.18572	0	-0.502638	0	-0.251209	0	0.00819063	0	-0.0110608	0
-21.88	-1.12329	0	-0.547122	0	-0.262971	0	0.00152516	0	-0.0312529	0
-20.88	-1.00953	0	-0.541984	0	-0.235975	0	0.0273306	0	-0.064994	0
-19.88	-0.929627	0	-0.518009	0	-0.21341	0	0.0283195	0	-0.0592073	0
-18.88	-0.813575	0	-0.47842	0	-0.20124	0	0.00862986	0	-0.0556294	0
-17.88	-0.705042	0	-0.444191	0	-0.201349	0	-0.0218755	0	-0.0820088	0
-16.88	-0.577064	0	-0.405056	0	-0.205085	0	-0.0297614	0	-0.0983547	0
-15.88	-0.48462	0	-0.347841	0	-0.203827	0	-0.0545658	0	-0.106813	0
-14.88	-0.389734	0	-0.314919	0	-0.177241	0	-0.0613043	0	-0.12272	0
-13.88	-0.290894	0	-0.263431	0	-0.153138	0	-0.0475472	0	-0.125431	0
-12.88	-0.20232	0	-0.190444	0	-0.109729	0	-0.0652348	0	-0.0913225	0
-11.88	-0.124573	0	-0.147952	0	-0.0728766	0	-0.0477301	0	-0.0920433	0
-10.88	-0.0404059	0	-0.100161	0	-0.0456244	0	-0.0341803	0	-0.0536524	0
-9.88	0.0330439	0	-0.0462301	0	-0.015479	0	-0.0141973	0	-0.0357931	0
-8.88	0.0923457	0	0.0253277	0	0.00146437	0	-0.00384569	0	-0.0086689	0
-7.88	0.179845	0	0.0784516	0	0.0258538	0	0.0294548	0	-0.00126028	0
-6.88	0.209264	0	0.11788	0	0.0391594	0	0.0900627	0	0.0186982	0
-5.88	0.196008	0	0.175144	0	0.055108	0	0.022973	0	0.0353123	0
-4.88	0.22854	0	0.23087	0	0.0716487	0	0.022668	0	0.0417828	0
-3.88	0.312048	0	0.242454	0	0.0783443	0	0.0989741	0	0.0307232	0
-2.88	0.40018	0	0.29408	0	0.167087	0	0.105747	0	0.0869272	0
-1.88	-1.605	0	0.400935	0	0.242873	0	0.548812	0	0.193415	0
-0.880005	0.861354	0	1.184	0	0.887386	0	1.10379	0	0.0612615	0
0.119995	-4.17821	2.81196	1.37785	0	1.6876	0	0.921031	0.353241	1.50718	0
1.12	24.2695	24.34	2.73019	5.98229	2.50146	3.57382	3.93008	3.18377	0.852752	0.755816
2.12	49.7016	42.8102	19.7433	16.6016	10.4619	8.96752	7.32518	5.82182	2.80591	2.14005
3.12	70.3149	58.6568	33.4418	26.1537	17.2415	13.9353	10.6713	8.28048	4.63876	3.43781
4.12	85.7471	72.2526	44.5152	34.7461	22.9197	18.5109	13.5075	10.5719	6.17807	4.65448
5.12	97.711	83.9172	53.4676	42.475	27.4809	22.7252	16.0562	12.7076	7.50591	5.79515
6.12	107.087	93.9249	60.7445	49.4273	31.3144	26.6067	18.335	14.698	8.67253	6.86455
7.12	114.518	102.511	66.8737	55.6809	34.8959	30.1818	20.4341	16.553	9.79963	7.86713
8.12	120.48	109.878	72.1862	61.3062	37.9936	33.4746	22.327	18.282	10.8333	8.80708
9.12	125.549	116.198	76.714	66.3662	40.874	36.5073	24.0923	19.8933	11.7308	9.68831
10.12	129.64	121.62	80.6948	70.9178	43.5966	39.3007	25.6792	21.3951	12.6811	10.5145
11.12	133.064	126.273	84.115	75.012	46.0476	41.8734	27.0949	22.7947	13.4968	11.289
12.12	136.042	130.264	87.0796	78.6948	48.3024	44.2431	28.3917	24.0992	14.3231	12.0152
13.12	138.453	133.689	89.6753	82.0075	50.3361	46.4256	29.6396	25.3149	15.1393	12.696
14.12	140.618	136.627	91.9064	84.9873	52.1796	48.4358	30.6887	26.448	15.8185	13.3343
15.12	142.432	139.148	93.89	87.6677	53.7462	50.2872	31.6453	27.504	16.4586	13.9327
16.12	144.075	141.31	95.6336	90.0788	55.1085	51.9925	32.5075	28.4882	17.0109	14.4937
17.12	145.572	143.166	97.096	92.2476	56.3183	53.5632	33.2146	29.4055	17.5079	15.0196
18.12	146.926	144.758	98.4606	94.1985	57.4036	55.0098	33.8619	30.2604	17.8933	15.5127
19.12	148.071	146.124	99.6653	95.9533	58.3924	56.3422	34.4462	31.0572	18.2867	15.975
20.12	149.061	147.295	100.704	97.5318	59.2871	57.5694	34.9324	31.7998	18.5945	16.4084
21.12	149.964	148.301	101.639	98.9516	60.0383	58.6997	35.4005	32.4919	18.9063	16.8147
22.12	150.847	149.163	102.486	100.229	60.7803	59.7407	35.8654	33.1369	19.1801	17.1957
23.12	151.626	149.903	103.269	101.378	61.5307	60.6996	36.3151	33.7381	19.5337	17.5528
24.12	152.292	150.538	104.005	102.411	62.1505	61.5827	36.6207	34.2984	19.7735	17.8877
25.12	152.939	151.083	104.586	103.341	62.7034	62.3961	36.9739	34.8206	19.9274	18.2016
26.12	153.578	151.55	105.191	104.177	63.2961	63.1453	37.3277	35.3072	20.1634	18.4959
27.12	154.03	151.951	105.721	104.929	63.7878	63.8354	37.602	35.7608	20.4058	18.7718
28.12	154.502	152.295	106.21	105.606	64.2318	64.4709	37.9226	36.1835	20.5584	19.0305
29.12	154.944	152.591	106.645	106.214	64.6498	65.0563	38.1384	36.5775	20.785	19.273
30.12	155.333	152.844	107.064	106.762	65.0478	65.5954	38.3904	36.9447	20.9552	19.5003
31.12	155.61	153.061	107.348	107.254	65.3125	66.092	38.4871	37.287	21.0771	19.7135
32.12	155.972	153.247	107.626	107.697	65.5916	66.5494	38.7172	37.6059	21.166	19.9134
33.12	156.271	153.407	107.967	108.095	65.9467	66.9706	38.8883	37.9032	21.2711	20.1007
34.12	156.471	153.545	108.249	108.454	66.2718	67.3586	39.0508	38.1802	21.445	20.2764
35.12	156.692	153.662	108.444	108.776	66.4234	67.716	39.1183	38.4384	21.5685	20.441
36.12	156.818	153.763	108.628	109.066	66.6238	68.0451	39.1908	38.6791	21.5846	20.5954
37.12	157.004	153.85	108.744	109.327	66.8445	68.3483	39.3174	38.9034	21.6391	20.7402
38.12	157.131	153.924	108.926	109.562	67.0421	68.6275	39.425	39.1124	21.7035	20.8759
39.12	157.274	153.988	109.092	109.773	67.2329	68.8846	39.535	39.3072	21.7665	21.0031
40.12	157.472	154.043	109.231	109.962	67.3837	69.1215	39.6435	39.4888	21.8258	21.1224
41.12	157.659	154.09	109.402	110.133	67.5882	69.3397	39.7743	39.658	21.9144	21.2342
42.12	157.837	154.13	109.573	110.287	67.7253	69.5406	39.874	39.8157	21.9701	21.339
43.12	157.98	154.165	109.675	110.425	67.8403	69.7257	39.9347	39.9627	22.0055	21.4373
44.12	158.16	154.194	109.84	110.549	68.0157	69.8961	39.9967	40.0997	22.0545	21.5295
45.12	158.256	154.22	109.985	110.661	68.1586	70.0531	40.0709	40.2274	22.1209	21.6158
46.12	158.347	154.242	110.045	110.762	68.2913	70.1977	40.1849	40.3464	22.162	21.6968
47.12	158.413	154.26	110.098	110.852	68.4001	70.3309	40.2587	40.4573	22.2123	21.7728
48.12	158.434	154.276	110.175	110.934	68.4948	70.4536	40.2966	40.5607	22.2776	21.844
49.12	158.482	154.29	110.286	111.007	68.5892	70.5666	40.3325	40.657	22.348	21.9107
50.12	158.571	154.302	110.365	111.073	68.6935	70.6706	40.4023	40.7468	22.4072	21.9733
51.12	158.576	154.312	110.443	111.132	68.8106	70.7665	40.4599	40.8305	22.4541	22.0319
52.12	158.64	154.321	110.533	111.185	68.8978	70.8548	40.5138	40.9084	22.4999	22.0869
53.12	158.672	154.328	110.608	111.233	68.9722	70.9361	40.5948	40.9811	22.5447	22.1385
54.12	158.695	154.335	110.674	111.276	69.0247	71.0109	40.6457	41.0489	22.5856	22.1868
55.12	158.798	154.34	110.729	111.315	69.0819	71.0799	40.6894	41.112	22.6099	22.2322
56.12	158.805	154.345	110.786	111.35	69.1449	71.1435	40.7083	41.1708	22.6597	22.2746
57.12	158.78	154.349	110.882	111.381	69.2343	71.202	40.7301	41.2257	22.6824	22.3145
58.12	158.783	154.352	110.961	111.409	69.3128	71.2559	40.7997	41.2768	22.6932	22.3518
59.12	158.83	154.355	110.999	111.435	69.3939	71.3055	40.8593	41.3244	22.7329	22.3868
60.12	158.886	154.358	111.065	111.458	69.4705	71.3512	40.9101	41.3688	22.7797	22.4197
61.12	158.896	154.36	111.17	111.478	69.5317	71.3933	40.9434	41.4102	22.8019	22.4504
62.12	158.918	154.362	111.243	111.497	69.5684	71.4321	40.9389	41.4488	22.8295	22.4793
63.12	158.909	154.364	111.254	111.513	69.5967	71.4678	40.9625	41.4847	22.8469	22.5063
64.12	158.976	154.365	111.317	111.528	69.7024	71.5007	41.0204	41.5182	22.8887	22.5317
65.12	159.068	154.366	111.482	111.542	69.8746	71.531	40.9348	41.5494	23.0065	22.5555
66.12	158.878	154.367	111.588	111.554	69.9509	71.5589	41.0221	41.5785	23.0796	22.5778
67.12	158.447	154.368	111.488	111.565	69.8188	71.5846	41.1916	41.6056	22.9433	22.5986
68.12	157.907	154.369	111.25	111.574	69.57	71.6083	41.3377	41.6309	22.743	22.6182
69.12	157.365	154.369	111.005	111.583	69.37	71.6301	41.4304	41.6545	22.576	22.6366
70.12	156.877	154.37	110.838	111.591	69.184	71.6502	41.4319	41.6764	22.4596	22.6538
71.12	156.468	154.371	110.654	111.598	69.0843	71.6687	41.3649	41.6969	22.3826	22.67
72.12	156.133	154.371	110.494	111.605	69.0571	71.6857	41.2834	41.7159	22.3724	22.6851
73.12	155.885	154.371	110.366	111.61	69.0092	71.7014	41.256	41.7337	22.3538	22.6993
74.12	155.685	154.372	110.28	111.616	69.0053	71.7159	41.2356	41.7503	22.3698	22.7126
75.12	155.513	154.372	110.189	111.62	68.9849	71.7292	41.1742	41.7657	22.3784	22.7251
76.12	155.317	154.372	110.093	111.624	68.9745	71.7415	41.1327	41.7801	22.4233	22.7368
77.12	155.167	154.372	110.003	111.628	68.9532	71.7528	41.0984	41.7935	22.4605	22.7477
78.12	155.013	154.372	109.936	111.632	68.9124	71.7632	41.0454	41.806	22.4858	22.758
79.12	154.882	154.373	109.87	111.635	68.8732	71.7727	40.9916	41.8177	22.496	22.7676
80.12	154.764	154.373	109.826	111.637	68.8651	71.7816	40.957	41.8285	22.5239	22.7767
81.12	154.636	154.373	109.811	111.64	68.9083	71.7897	40.9168	41.8386	22.543	22.7851
82.12	154.536	154.373	109.803	111.642	68.9057	71.7972	40.8808	41.8481	22.5187	22.7931
83.12	154.431	154.373	109.818	111.644	68.9106	71.8041	40.8184	41.8568	22.5009	22.8005
84.12	154.375	154.373	109.829	111.646	68.9063	71.8104	40.7894	41.865	22.5153	22.8075
85.12	154.322	154.373	109.867	111.647	68.8992	71.8163	40.7547	41.8727	22.5514	22.814
86.12	154.262	154.373	109.882	111.649	68.8671	71.8217	40.7302	41.8798	22.5715	22.8202
87.12	154.222	154.373	109.914	111.65	68.8381	71.8266	40.7063	41.8864	22.5593	22.8259
88.12	154.17	154.373	109.948	111.651	68.81	71.8312	40.6907	41.8926	22.5813	22.8313
89.12	154.102	154.373	109.979	111.652	68.7778	71.8354	40.6281	41.8983	22.6079	22.8364
90.12	153.996	154.373	109.978	111.653	68.7294	71.8393	40.5136	41.9037	22.6095	22.8411
91.12	153.909	154.373	109.924	111.654	68.6761	71.8428	40.4529	41.9087	22.5361	22.8456
92.12	153.85	154.373	109.91	111.655	68.6223	71.8461	40.4144	41.9134	22.5023	22.8497
93.12	153.819	154.373	109.912	111.656	68.6029	71.8492	40.373	41.9177	22.4786	22.8536
94.12	153.76	154.373	109.906	111.656	68.5525	71.852	40.29	41.9218	22.4661	22.8573
95.12	153.716	154.373	109.898	111.657	68.4871	71.8545	40.2138	41.9256	22.4391	22.8607
96.12	153.671	154.373	109.879	111.657	68.4554	71.8569	40.165	41.9291	22.4124	22.8639
97.12	153.634	154.373	109.87	111.658	68.4192	71.8591	40.1296	41.9323	22.3757	22.867
98.12	153.544	154.373	109.852	111.658	68.3651	71.8611	40.0721	41.9354	22.3316	22.8698
99.12	153.459	154.373	109.811	111.659	68.2753	71.8629	39.978	41.9383	22.2755	22.8724
100.12	153.397	154.373	109.725	111.659	68.1917	71.8646	39.9206	41.9409	22.2348	22.8749
101.12	153.364	154.373	109.689	111.659	68.1149	71.8662	39.8385	41.9434	22.2139	22.8773
102.12	153.307	154.373	109.692	111.66	68.0815	71.8676	39.7686	41.9457	22.1616	22.8794
103.12	153.235	154.373	109.667	111.66	68.0189	71.869	39.7034	41.9478	22.14	22.8815
104.12	153.193	154.373	109.596	111.66	67.9329	71.8702	39.6228	41.9498	22.0868	22.8834
105.12	153.165	154.373	109.517	111.66	67.8391	71.8713	39.5609	41.9517	22.031	22.8852
106.12	153.17	154.373	109.473	111.66	67.7836	71.8724	39.5136	41.9534	22.0017	22.8869
107.12	153.166	154.373	109.487	111.661	67.7258	71.8733	39.4593	41.9551	21.958	22.8885
108.12	153.167	154.373	109.473	111.661	67.6558	71.8742	39.3648	41.9566	21.9021	22.89
109.12	153.142	154.373	109.484	111.661	67.5748	71.875	39.2662	41.958	21.8845	22.8914
110.12	153.148	154.373	109.477	111.661	67.4825	71.8758	39.191	41.9593	21.8246	22.8927
111.12	153.154	154.373	109.445	111.661	67.3796	71.8765	39.1179	41.9605	21.7623	22.8939
112.12	153.145	154.373	109.419	111.661	67.2898	71.8771	39.0503	41.9617	21.6889	22.895
113.12	153.133	154.373	109.393	111.661	67.1963	71.8777	38.9729	41.9627	21.6443	22.8961
114.12	153.192	154.373	109.393	111.661	67.131	71.8782	38.8927	41.9637	21.5883	22.8971
115.12	153.33	154.373	109.435	111.661	67.0662	71.8787	38.8207	41.9646	21.5833	22.8981
116.12	153.265	154.373	109.466	111.661	67.0009	71.8792	38.7659	41.9655	21.5604	22.8989
117.12	153.257	154.373	109.443	111.661	66.9038	71.8796	38.6629	41.9663	21.5294	22.8998
118.12	153.473	154.373	109.377	111.662	66.7763	71.88	38.7135	41.967	21.4993	22.9005
119.12	154.015	154.373	109.166	111.662	66.4912	71.8803	38.1637	41.9677	21.2707	22.9013
120.12	153.639	153.292	112.491	111.662	68.4962	71.8807	38.856	41.9684	21.7118	22.902
121.12	137.248	144.567	102.327	108.311	61.786	69.3161	34.5755	39.5797	20.2729	22.3456
122.12	126.813	136.339	94.7259	102.146	57.1439	65.3709	31.7664	37.327	18.6666	21.0738
123.12	117.258	128.579	87.2042	96.3323	52.4838	61.6502	29.2225	35.2025	17.1977	19.8743
124.12	108.958	121.261	80.8789	90.8494	48.4873	58.1414	27.0585	33.1989	15.9459	18.7432
125.12	101.562	114.359	75.212	85.6786	45.0482	54.8322	25.0995	31.3093	14.7641	17.6764
126.12	95.019	107.85	70.1404	80.8021	42.0062	51.7113	23.3864	29.5273	13.8203	16.6703
127.12	89.202	101.712	65.7261	76.2032	39.2412	48.7681	21.9442	27.8468	12.9368	15.7215
128.12	83.8721	95.9227	61.6856	71.866	36.8645	45.9924	20.5615	26.2618	12.1319	14.8267
129.12	79.1424	90.4631	58.0429	67.7757	34.6415	43.3747	19.3417	24.7671	11.497	13.9828
130.12	74.7905	85.3143	54.8582	63.9182	32.6247	40.906	18.1959	23.3575	10.9401	13.187
131.12	70.9117	80.4586	51.9432	60.2802	30.7943	38.5778	17.2828	22.028	10.4353	12.4364
132.12	67.3994	75.8792	49.3084	56.8493	29.2763	36.3821	16.4686	20.7743	9.95534	11.7286
133.12	64.1914	71.5604	46.8807	53.6136	27.8623	34.3114	15.7262	19.5919	9.5739	11.061
134.12	61.0808	67.4875	44.7034	50.5622	26.5755	32.3585	14.9949	18.4768	9.24109	10.4315
135.12	58.3976	63.6464	42.6499	47.6844	25.2096	30.5168	14.2722	17.4252	8.87502	9.83777
136.12	55.8147	60.0239	40.746	44.9704	24.151	28.7799	13.7562	16.4334	8.51569	9.27784
137.12	53.5411	56.6076	39.1093	42.4108	23.1523	27.1419	13.1937	15.4981	8.26962	8.74979
138.12	51.2568	53.3857	37.537	39.997	22.2215	25.5971	12.7374	14.616	8.0205	8.25178
139.12	49.3411	50.3472	35.9653	37.7205	21.3553	24.1402	12.2256	13.7841	7.79566	7.78212
140.12	47.4187	47.4816	34.6083	35.5736	20.5064	22.7662	11.8246	12.9996	7.61526	7.33919
141.12	45.6704	44.7791	33.2699	33.5489	19.754	21.4704	11.4374	12.2597	7.4158	6.92147
142.12	44.03	42.2305	32.1377	31.6394	19.0654	20.2484	11.0926	11.5619	7.18016	6.52753
143.12	42.5518	39.8269	31.0604	29.8386	18.4433	19.096	10.8087	10.9039	7.07079	6.15601
144.12	41.2231	37.5601	29.9889	28.1403	17.8353	18.0091	10.5246	10.2832	6.93878	5.80563
145.12	39.8705	35.4223	29.0428	26.5387	17.303	16.9841	10.2437	9.69797	6.82241	5.4752
146.12	38.5988	33.4062	28.1454	25.0282	16.7721	16.0174	9.94283	9.146	6.70139	5.16357
147.12	37.2598	31.5049	27.2509	23.6037	16.2393	15.1058	9.64142	8.62544	6.57813	4.86968
148.12	36.1414	29.7117	26.4059	22.2603	15.7291	14.246	9.38879	8.13451	6.42926	4.59252
149.12	35.0673	28.0207	25.6561	20.9933	15.3394	13.4352	9.17615	7.67153	6.31806	4.33113
150.12	34.0082	26.4258	24.9156	19.7984	14.8991	12.6705	8.96029	7.2349	6.20695	4.08462
151.12	33.0321	24.9218	24.1549	18.6716	14.467	11.9494	8.74563	6.82311	6.11619	3.85214
152.12	32.0555	23.5033	23.4766	17.6089	14.0833	11.2692	8.57788	6.43477	6.03387	3.63289
153.12	31.2288	22.1656	22.877	16.6067	13.7555	10.6278	8.42236	6.06853	5.94098	3.42612
154.12	30.3105	20.904	22.2687	15.6615	13.4781	10.0229	8.23962	5.72313	5.87402	3.23112
155.12	29.519	19.7143	21.6931	14.7701	13.1353	9.45248	8.12115	5.39739	5.77814	3.04721
156.12	28.7082	18.5922	21.1784	13.9294	12.8031	8.91448	7.96072	5.09019	5.69199	2.87378
157.12	27.9823	17.534	20.6849	13.1366	12.4961	8.4071	7.81647	4.80048	5.59723	2.71021
158.12	27.2504	16.536	20.1506	12.3889	12.2005	7.9286	7.65485	4.52725	5.53034	2.55596
159.12	26.5246	15.5949	19.6803	11.6838	11.9264	7.47734	7.5023	4.26958	5.44735	2.41048
160.12	25.8939	14.7073	19.1982	11.0188	11.6938	7.05176	7.40975	4.02657	5.35862	2.27329
161.12	25.3293	13.8702	18.7969	10.3917	11.477	6.6504	7.30607	3.79739	5.30392	2.1439
162.12	24.7177	13.0808	18.371	9.80021	11.2463	6.27188	7.19281	3.58126	5.25885	2.02188
163.12	24.119	12.3363	17.9387	9.24242	11.0397	5.91491	7.06963	3.37743	5.21907	1.9068
164.12	23.562	11.6341	17.555	8.71637	10.8063	5.57826	6.94508	3.1852	5.16198	1.79827
165.12	23.0302	10.972	17.1506	8.22027	10.6129	5.26076	6.84481	3.00391	5.10056	1.69592
166.12	22.4986	10.3475	16.7626	7.7524	10.4495	4.96134	6.78083	2.83294	5.0653	1.5994
167.12	21.9918	9.75854	16.4749	7.31117	10.2503	4.67896	6.69087	2.6717	5.05724	1.50837
168.12	21.5752	9.20312	16.1252	6.89504	10.0851	4.41265	6.59572	2.51964	5.02391	1.42252
169.12	21.1122	8.67931	15.8643	6.5026	9.93233	4.1615	6.50188	2.37623	5.00685	1.34155
170.12	20.6575	8.18532	15.5748	6.1325	9.76735	3.92465	6.4464	2.24098	4.94624	1.2652
171.12	20.2167	7.71944	15.2444	5.78346	9.612	3.70127	6.39587	2.11343	4.89014	1.19319
172.12	19.7662	7.28008	14.9336	5.45429	9.44825	3.49061	6.33442	1.99315	4.859	1.12527
173.12	19.387	6.86573	14.6491	5.14385	9.302	3.29194	6.2478	1.8797	4.79706	1.06123
174.12	18.9795	6.47496	14.3118	4.85109	9.19083	3.10457	6.16687	1.77272	4.77185	1.00083
175.12	18.5723	6.10643	14.0756	4.57498	9.06099	2.92787	6.09825	1.67182	4.71968	0.943864
176.12	18.213	5.75887	13.8544	4.31459	8.92005	2.76123	6.01639	1.57667	4.69815	0.890142
177.12	17.8132	5.4311	13.5953	4.06902	8.76925	2.60407	5.94707	1.48693	4.67293	0.839479
178.12	17.4277	5.12198	13.3883	3.83743	8.62041	2.45586	5.86541	1.4023	4.63545	0.791699
179.12	17.0887	4.83046	13.1505	3.61902	8.52689	2.31608	5.8187	1.32249	4.5939	0.746639
180.12	16.8036	4.55553	12.9454	3.41304	8.43324	2.18426	5.79658	1.24722	4.56713	0.704143
181.12	16.5152	4.29624	12.7448	3.21878	8.31867	2.05994	5.77012	1.17623	4.54281	0.664066
182.12	16.2431	4.05172	12.5333	3.03558	8.22028	1.94269	5.72971	1.10928	4.51608	0.62627
183.12	15.9434	3.82111	12.3478	2.8628	8.10876	1.83212	5.66866	1.04615	4.50016	0.590625
184.12	15.6458	3.60363	12.1505	2.69986	8.01862	1.72784	5.60618	0.986604	4.47622	0.557009
185.12	15.3149	3.39852	11.9748	2.5462	7.90413	1.6295	5.54833	0.93045	4.44233	0.525306
186.12	15.0257	3.20509	11.8	2.40128	7.77797	1.53676	5.48925	0.877493	4.4167	0.495408
187.12	14.7893	3.02267	11.6198	2.26461	7.65141	1.44929	5.44587	0.827549	4.38506	0.467211
188.12	14.5485	2.85063	11.4322	2.13571	7.57554	1.3668	5.38984	0.780448	4.36736	0.440619
189.12	14.3372	2.68839	11.2857	2.01416	7.50991	1.28901	5.36162	0.736028	4.34541	0.415541
190.12	14.0918	2.53537	11.1423	1.89952	7.44694	1.21564	5.30549	0.694136	4.32439	0.39189
191.12	13.8801	2.39107	10.9849	1.79141	7.35904	1.14645	5.28186	0.654629	4.29431	0.369585
192.12	13.6712	2.25498	10.8243	1.68945	7.28714	1.0812	5.26563	0.61737	4.25476	0.34855
193.12	13.4421	2.12663	10.663	1.59329	7.21689	1.01967	5.22595	0.582231	4.23572	0.328711
194.12	13.2396	2.00559	10.545	1.50261	7.1521	0.96163	5.19336	0.549093	4.20746	0.310002
195.12	12.996	1.89144	10.3948	1.41708	7.08798	0.906897	5.1756	0.517841	4.20605	0.292358
196.12	12.785	1.78379	10.2823	1.33643	7.02197	0.85528	5.14081	0.488367	4.18945	0.275718
197.12	12.6091	1.68226	10.1639	1.26036	6.96214	0.806601	5.12031	0.460571	4.18761	0.260026
198.12	12.4241	1.58652	10.0307	1.18863	6.93084	0.760692	5.09197	0.434357	4.17018	0.245226
199.12	12.2514	1.49622	9.88463	1.12098	6.87816	0.717397	5.063	0.409635	4.13695	0.231269
200.12	12.0632	1.41106	9.76721	1.05718	6.82953	0.676565	5.02161	0.386321	4.13544	0.218106
201.12	11.8557	1.33075	9.65424	0.997005	6.76605	0.638058	4.96655	0.364333	4.13348	0.205692
202.12	11.6628	1.25501	9.54993	0.940259	6.69867	0.601742	4.9353	0.343596	4.11591	0.193985
203.12	11.4854	1.18358	9.45129	0.886743	6.63632	0.567493	4.89343	0.32404	4.11365	0.182944
204.12	11.3037	1.11621	9.35856	0.836273	6.56527	0.535194	4.86373	0.305597	4.07139	0.172531
205.12	11.1609	1.05268	9.27914	0.788676	6.49988	0.504733	4.85496	0.288204	4.04592	0.162712
206.12	11.0043	0.992766	9.16938	0.743787	6.44622	0.476005	4.8358	0.2718	3.99507	0.153451
207.12	10.8597	0.936261	9.05237	0.701454	6.37769	0.448913	4.80878	0.25633	3.94525	0.144717
208.12	10.7219	0.882973	8.93563	0.66153	6.3155	0.423362	4.80186	0.241741	3.92123	0.13648
209.12	10.5856	0.832718	8.84236	0.623878	6.26674	0.399266	4.78661	0.227982	3.89375	0.128712
210.12	10.4381	0.785323	8.73009	0.588369	6.21193	0.376542	4.74812	0.215006	3.87267	0.121386
211.12	10.3021	0.740625	8.63292	0.554882	6.16319	0.35511	4.71174	0.202769	3.83916	0.114478
212.12	10.1554	0.698471	8.55582	0.5233	6.12106	0.334899	4.7026	0.191228	3.83579	0.107962
213.12	9.99487	0.658717	8.47485	0.493516	6.09567	0.315838	4.67133	0.180344	3.81354	0.101817
214.12	9.86135	0.621226	8.37809	0.465427	6.04058	0.297861	4.63552	0.17008	3.7656	0.0960221
215.12	9.75331	0.585868	8.2882	0.438936	6.00697	0.280908	4.6028	0.160399	3.74443	0.0905569
216.12	9.63671	0.552522	8.20533	0.413954	5.98571	0.26492	4.59398	0.15127	3.72212	0.0854028
217.12	9.54123	0.521075	8.11447	0.390393	5.93027	0.249842	4.56534	0.14266	3.71292	0.080542
218.12	9.4292	0.491417	8.01007	0.368174	5.86914	0.235622	4.5451	0.134541	3.69214	0.0759578
219.12	9.33898	0.463448	7.92219	0.347219	5.821	0.222211	4.53179	0.126883	3.67457	0.0716346
220.12	9.24248	0.43707	7.85231	0.327456	5.79262	0.209564	4.52477	0.119661	3.66523	0.0675574
221.12	9.12391	0.412194	7.78514	0.308819	5.77205	0.197636	4.49305	0.112851	3.66643	0.0637123
222.12	9.01233	0.388733	7.71356	0.291242	5.72839	0.186387	4.47321	0.106428	3.64551	0.0600861
223.12	8.93884	0.366608	7.63708	0.274666	5.74039	0.175779	4.46808	0.10037	3.63751	0.0566662
224.12	8.85022	0.345742	7.57367	0.259033	5.73026	0.165774	4.45142	0.0946575	3.64282	0.053441
225.12	8.77025	0.326064	7.52412	0.244289	5.71752	0.156339	4.43181	0.08927	3.63423	0.0503993
226.12	8.68384	0.307506	7.46674	0.230385	5.70068	0.147441	4.42401	0.0841891	3.62573	0.0475308
227.12	8.6073	0.290004	7.41626	0.217273	5.67285	0.139049	4.41071	0.0793974	3.59631	0.0448255
228.12	8.53824	0.273498	7.3738	0.204906	5.65192	0.131135	4.38584	0.0748784	3.57528	0.0422742
229.12	8.43295	0.257931	7.3173	0.193244	5.60241	0.123671	4.35598	0.0706166	3.55479	0.0398681
230.12	8.3233	0.243251	7.26202	0.182245	5.5658	0.116632	4.30865	0.0665974	3.53198	0.037599
231.12	8.24464	0.229406	7.17772	0.171873	5.5168	0.109994	4.27504	0.0628069	3.49846	0.035459
232.12	8.14019	0.216349	7.12837	0.16209	5.48626	0.103734	4.24944	0.0592322	3.5096	0.0334408
233.12	8.05201	0.204035	7.04845	0.152865	5.44337	0.0978295	4.22303	0.0558609	3.49834	0.0315375
234.12	7.98145	0.192422	6.98633	0.144164	5.43039	0.0922615	4.21808	0.0526815	3.49841	0.0297425
235.12	7.93872	0.18147	6.95416	0.135959	5.41092	0.0870103	4.21948	0.0496831	3.50537	0.0280497
236.12	7.88763	0.171142	6.9165	0.128221	5.38443	0.082058	4.22394	0.0468553	3.50867	0.0264532
237.12	7.82135	0.161401	6.88513	0.120923	5.36749	0.0773876	4.21973	0.0441885	3.52289	0.0249476
238.12	7.74977	0.152215	6.84221	0.11404	5.34584	0.072983	4.21064	0.0416735	3.51604	0.0235277
239.12	7.695	0.143551	6.81025	0.10755	5.32433	0.0688291	4.19487	0.0393016	3.52156	0.0221886
240.12	7.65162	0.135381	6.76696	0.101428	5.32002	0.0649116	4.18232	0.0370647	3.52709	0.0209257
241.12	7.60411	0.127676	6.73469	0.0956555	5.3069	0.0612171	4.16106	0.0349551	3.53584	0.0197347

## Sheet: biotin-C3b ISG65ΔL2
Cycle: 9 ISG65dL2 5000 nM_X	Cycle: 10 ISG65dL2 5000 nM_Y	Fitted Cycle: 10 ISG65dL2 5000_Y	Cycle: 11 ISG65dL2 2500 nM_Y	Fitted Cycle: 11 ISG65dL2 2500_Y	Cycle: 12 ISG65dL2 1250 nM_Y	Fitted Cycle: 12 ISG65dL2 1250_Y	Cycle: 13 ISG65dL2 625 nM_Y	Fitted Cycle: 13 ISG65dL2 625 _Y	Cycle: 14 ISG65dL2 312.5 nM_Y	Fitted Cycle: 14 ISG65dL2 312._Y
-59.96	-1.10785	0	-1.03256	0	-0.180268	0	0.202118	0	-0.18036	0
-58.96	-1.08832	0	-1.01616	0	-0.173627	0	0.213446	0	-0.158094	0
-57.96	-1.06879	0	-1.01225	0	-0.167768	0	0.23493	0	-0.127821	0
-56.96	-1.03754	0	-0.962252	0	-0.149019	0	0.268524	0	-0.0787982	0
-55.96	-0.988708	0	-0.93686	0	-0.16269	0	0.284149	0	-0.0680549	0
-54.96	-0.978943	0	-0.952485	0	-0.178315	0	0.291961	0	-0.0475475	0
-53.96	-0.967224	0	-0.955609	0	-0.181439	0	0.279852	0	-0.0448121	0
-52.96	-0.986755	0	-0.975921	0	-0.203704	0	0.250946	0	-0.0612179	0
-51.96	-1.01801	0	-0.972798	0	-0.208393	0	0.270868	0	-0.0590708	0
-50.96	-0.988708	0	-0.94975	0	-0.187299	0	0.275946	0	-0.077039	0
-49.96	-0.998474	0	-0.929047	0	-0.166596	0	0.266571	0	-0.0963749	0
-48.96	-0.986755	0	-0.925141	0	-0.152924	0	0.274383	0	-0.0875862	0
-47.96	-0.998474	0	-0.917329	0	-0.123627	0	0.274383	0	-0.0485237	0
-46.96	-0.998474	0	-0.897797	0	-0.125581	0	0.27243	0	-0.00750804	0
-45.96	-0.988708	0	-0.879439	0	-0.115034	0	0.311102	0	0.0196396	0
-44.96	-0.969177	0	-0.874359	0	-0.102142	0	0.307587	0	-0.00360107	0
-43.96	-0.969177	0	-0.875532	0	-0.132612	0	0.295477	0	0.013781	0
-42.96	-0.94574	0	-0.867329	0	-0.122455	0	0.292352	0	-0.00731266	0
-41.96	-0.93988	0	-0.875531	0	-0.142377	0	0.270087	0	-0.0545777	0
-40.96	-0.955505	0	-0.881	0	-0.157611	0	0.266962	0	-0.0766482	0
-39.96	-0.97113	0	-0.886078	0	-0.133392	0	0.276337	0	-0.116882	0
-38.96	-0.988708	0	-0.887249	0	-0.126751	0	0.250556	0	-0.162976	0
-37.96	-1.00629	0	-0.89389	0	-0.11972	0	0.239227	0	-0.175476	0
-36.96	-1.05972	0	-0.968892	0	-0.149018	0	0.0685271	0	-0.207703	0
-35.96	3.06207	0	1.96378	0	1.67983	0	1.94282	0	0.97169	0
-34.96	2.81887	0	1.48545	0	2.0308	0	0.229013	0	-0.136479	0
-33.96	-2.01394	0	-1.35521	0	-1.28112	0	-0.504623	0	-0.439414	0
-32.96	-0.270508	0	-0.185724	0	0.0284481	0	0.0190029	0	-0.0557842	0
-31.96	-0.347069	0	-0.298797	0	-0.402988	0	-0.168683	0	-0.299991	0
-30.96	0.303478	0	0.00134999	0	0.0795017	0	0.0363349	0	-0.0919957	0
-29.96	-0.138084	0	-0.258454	0	-0.0955359	0	-0.0217732	0	-0.112462	0
-28.96	-0.00417709	0	-0.0899084	0	0.0764468	0	-0.0867868	0	-0.122627	0
-27.96	-0.0348816	0	-0.0680367	0	-0.0280052	0	-0.0433546	0	-0.0550133	0
-26.96	-0.00823975	0	0.00381166	0	0.0409477	0	0.0183019	0	-0.0431663	0
-25.96	0.0178528	0	0.0069679	0	0.0376991	0	0.00149482	0	-0.0636765	0
-24.96	0.0616837	0	0.0224389	0	0.0330895	0	-0.00335157	0	-0.0866843	0
-23.96	0.0718384	0	0.00076443	0	0.0314956	0	0.00228804	0	-0.067389	0
-22.96	0.063633	0	-0.0265531	0	0.0171481	0	0.0310202	0	-0.0147008	0
-21.96	0.0770683	0	-0.0280161	0	0.0466222	0	0.0366068	0	-0.0252238	0
-20.96	0.0976219	0	-0.0159043	0	0.0457641	0	0.0369184	0	-0.0289391	0
-19.96	0.0959015	0	-0.0262018	0	0.0221838	0	0.046789	0	0.0194754	0
-18.96	0.114967	0	-0.0620292	0	0.0238625	0	0.00974709	0	0.00235909	0
-17.96	0.0842628	0	-0.0655763	0	-0.00234389	0	-0.00907192	0	-0.00896621	0
-16.96	0.0517578	0	-0.0312065	0	-0.012114	0	-0.0181371	0	-0.00513691	0
-15.96	0.0355072	0	-0.0193938	0	-0.00538242	0	0.00189594	0	0.0310098	0
-14.96	0.112694	0	-0.0104228	0	0.0149984	0	0.00796475	0	0.0436582	0
-13.96	0.0452003	0	-0.023576	0	0.00841022	0	-0.000222921	0	0.0276515	0
-12.96	-0.00511169	0	-0.0157627	0	0.00958216	0	0.00173175	0	0.0278469	0
-11.96	-0.000110626	0	-0.0132945	0	0.00736207	0	0.00229635	0	-0.000194848	0
-10.96	-0.0102692	0	-0.0166698	0	-0.012424	0	-0.00141001	0	-0.0149341	0
-9.95996	-0.0117531	0	-0.0215456	0	-0.00909442	0	-0.005539	0	-0.0127069	0
-8.95996	-0.0114441	0	-0.0152179	0	-0.0207339	0	-0.0194413	0	-0.0227786	0
-7.95996	-0.0297203	0	0.00314146	0	-0.0429973	0	-0.0249119	0	-0.0198535	0
-6.95996	-0.027771	0	0.00782674	0	-0.0285502	0	-0.0163196	0	-0.00481135	0
-5.95996	-0.00785065	0	-0.000248667	0	-0.0205314	0	0.00479102	0	-0.0221107	0
-4.95996	0.024498	0	-0.010736	0	-0.0225005	0	0.01226	0	-0.0211883	0
-3.95996	0.0343399	0	0.00567102	0	0.0314775	0	0.0217128	0	-0.00666189	0
-2.95996	0.0523071	0	-0.0387681	0	0.0865753	0	0.0329173	0	0.0249221	0
-1.95996	0.0867615	0	0.191581	0	0.0541151	0	0.110346	0	-0.0354769	0
-0.959961	0.131836	0	0.0389643	0	-0.350692	0	-0.214719	0	-0.367351	0
0.0400391	-1.58628	0	-0.780923	0	0.202781	0	1.10353	0	1.66218	0.113777
1.04004	0.751373	3.06681	0.857202	3.98388	1.54184	2.00847	1.56829	1.5416	1.20014	0.874533
2.04004	10.2547	14.268	10.2152	9.4352	5.82947	4.81597	3.86518	2.90449	3.01461	1.55152
3.04004	27.7437	23.3018	18.258	14.0686	10.0594	7.26565	5.97809	4.10938	4.34197	2.15396
4.04004	37.7897	30.5875	23.8454	18.0067	13.1527	9.40312	7.40038	5.17458	5.02147	2.69007
5.04004	44.1414	36.4635	27.9117	21.3539	15.3193	11.2682	8.26319	6.1163	5.34348	3.16715
6.04004	48.0307	41.2025	30.7514	24.1989	16.7593	12.8955	9.08839	6.94884	5.65796	3.59169
7.04004	50.7621	45.0245	32.782	26.617	17.9791	14.3154	9.66361	7.68487	5.87679	3.96949
8.04004	52.5731	48.1069	34.142	28.6723	18.7909	15.5544	10.1365	8.33557	6.0364	4.30569
9.04004	53.842	50.5929	35.0152	30.4192	19.4424	16.6354	10.5532	8.91083	6.13931	4.60487
10.04	54.7525	52.5978	35.6501	31.9039	20.069	17.5787	10.8054	9.41941	6.30415	4.8711
11.04	55.3886	54.2148	36.0427	33.1659	20.49	18.4017	11.0892	9.86902	6.53523	5.10802
12.04	55.93	55.5189	36.3602	34.2386	20.9292	19.1199	11.4373	10.2665	6.65727	5.31886
13.04	56.3106	56.5707	36.5616	35.1502	21.186	19.7465	11.6653	10.6179	6.75903	5.50647
14.04	56.6185	57.419	36.7465	35.9251	21.3969	20.2933	11.8197	10.9286	6.84824	5.67343
15.04	56.8404	58.1031	36.9204	36.5837	21.6192	20.7703	11.9438	11.2033	6.92299	5.822
16.04	57.0843	58.6548	37.0411	37.1435	21.7771	21.1866	12.1045	11.4461	7.03335	5.95422
17.04	57.2823	59.0998	37.1437	37.6193	21.935	21.5498	12.2109	11.6607	7.08259	6.07187
18.04	57.4461	59.4587	37.2943	38.0237	22.0578	21.8667	12.2829	11.8505	7.11613	6.17657
19.04	57.5257	59.7481	37.3466	38.3674	22.187	22.1433	12.3249	12.0183	7.17882	6.26975
20.04	57.609	59.9815	37.4629	38.6596	22.316	22.3846	12.4704	12.1666	7.28659	6.35266
21.04	57.8222	60.1698	37.7581	38.9079	22.5365	22.5951	12.5876	12.2978	7.36339	6.42644
22.04	57.9477	60.3216	37.8546	39.119	22.6392	22.7788	12.6408	12.4137	7.4157	6.4921
23.04	57.9996	60.4441	37.826	39.2984	22.6468	22.9391	12.6644	12.5162	7.38742	6.55053
24.04	58.023	60.5429	37.8491	39.4508	22.7086	23.0789	12.7474	12.6068	7.47019	6.60252
25.04	58.1261	60.6225	37.9077	39.5804	22.8092	23.201	12.8138	12.6869	7.52695	6.64879
26.04	58.1997	60.6867	37.966	39.6906	22.9097	23.3075	12.8969	12.7577	7.6662	6.68996
27.04	58.3629	60.7385	38.0303	39.7842	22.8969	23.4004	12.8308	12.8203	7.71575	6.7266
28.04	58.4347	60.7803	38.0266	39.8638	22.9008	23.4814	12.9103	12.8757	7.67669	6.75921
29.04	58.4203	60.814	37.9863	39.9314	23.0017	23.5522	12.9923	12.9246	7.63658	6.78823
30.04	58.4432	60.8412	38.081	39.9889	23.0199	23.6139	13.0396	12.9679	7.72516	6.81405
31.04	58.6586	60.8631	38.1079	40.0377	23.0323	23.6677	13.1185	13.0061	7.76457	6.83702
32.04	58.6191	60.8808	38.1248	40.0793	23.0694	23.7147	13.1142	13.0399	7.76379	6.85747
33.04	58.683	60.895	38.1735	40.1146	23.1274	23.7557	13.1714	13.0698	7.87007	6.87567
34.04	58.7582	60.9065	38.1941	40.1446	23.1612	23.7915	13.2247	13.0962	7.89422	6.89186
35.04	58.8172	60.9158	38.2315	40.1701	23.1891	23.8227	13.1661	13.1196	7.87948	6.90627
36.04	58.9004	60.9233	38.2975	40.1917	23.1226	23.8499	13.1763	13.1402	7.8977	6.91909
37.04	58.8532	60.9293	38.2755	40.2101	23.1704	23.8737	13.2413	13.1585	7.90765	6.9305
38.04	58.8957	60.9342	38.3002	40.2258	23.272	23.8944	13.3009	13.1746	7.92511	6.94066
39.04	58.944	60.9381	38.3568	40.2391	23.3253	23.9125	13.3099	13.1889	7.93828	6.94969
40.04	58.9769	60.9413	38.381	40.2504	23.3794	23.9283	13.3454	13.2015	7.99406	6.95773
41.04	59.0672	60.9438	38.4107	40.26	23.4346	23.9421	13.3943	13.2127	8.06	6.96489
42.04	59.121	60.9459	38.4101	40.2682	23.4691	23.9541	13.4249	13.2226	8.08831	6.97126
43.04	59.15	60.9475	38.3962	40.2751	23.483	23.9646	13.45	13.2313	8.08852	6.97692
44.04	59.178	60.9489	38.4031	40.2811	23.4895	23.9738	13.4776	13.239	8.07281	6.98197
45.04	59.2218	60.95	38.4391	40.2861	23.516	23.9817	13.5241	13.2458	8.12816	6.98645
46.04	59.2926	60.9508	38.4766	40.2903	23.5434	23.9887	13.5482	13.2518	8.14422	6.99045
47.04	59.3547	60.9515	38.5265	40.294	23.5637	23.9948	13.5706	13.2571	8.18159	6.994
48.04	59.3936	60.9521	38.5356	40.297	23.6157	24.0001	13.5877	13.2618	8.22777	6.99716
49.04	59.4164	60.9525	38.572	40.2997	23.6727	24.0047	13.6238	13.266	8.28422	6.99998
50.04	59.4593	60.9529	38.5947	40.3019	23.7085	24.0088	13.6398	13.2697	8.30631	7.00248
51.04	59.4589	60.9532	38.6062	40.3038	23.7288	24.0123	13.6669	13.2729	8.3034	7.00471
52.04	59.4656	60.9535	38.6193	40.3054	23.7643	24.0154	13.6858	13.2758	8.31046	7.00669
53.04	59.5132	60.9536	38.6506	40.3067	23.7975	24.018	13.6998	13.2784	8.30304	7.00846
54.04	59.5324	60.9538	38.6712	40.3079	23.7985	24.0204	13.7212	13.2806	8.3044	7.01003
55.04	59.5683	60.9539	38.723	40.3089	23.7881	24.0224	13.742	13.2826	8.30637	7.01142
56.04	59.5847	60.954	38.7423	40.3097	23.8072	24.0242	13.7684	13.2844	8.3139	7.01267
57.04	59.6194	60.9541	38.7575	40.3104	23.8338	24.0258	13.7771	13.2859	8.3419	7.01377
58.04	59.662	60.9542	38.7341	40.3111	23.8611	24.0271	13.791	13.2873	8.36046	7.01476
59.04	59.7027	60.9542	38.7467	40.3116	23.8952	24.0283	13.8034	13.2885	8.37803	7.01564
60.04	59.7484	60.9543	38.7813	40.312	23.9149	24.0293	13.847	13.2896	8.42671	7.01642
61.04	59.8106	60.9543	38.8798	40.3124	23.945	24.0302	13.8475	13.2905	8.43414	7.01711
62.04	59.8546	60.9543	38.9492	40.3127	23.9422	24.031	13.8768	13.2914	8.42847	7.01773
63.04	59.9264	60.9544	38.993	40.313	23.9583	24.0317	13.896	13.2921	8.44221	7.01828
64.04	59.9961	60.9544	39.0015	40.3132	23.9554	24.0323	13.9196	13.2927	8.3864	7.01877
65.04	59.9737	60.9544	38.9185	40.3134	23.8966	24.0328	13.9668	13.2933	8.26332	7.0192
66.04	59.8531	60.9544	38.7959	40.3136	23.8134	24.0333	14.0616	13.2938	8.18781	7.01959
67.04	59.7532	60.9544	38.7043	40.3137	23.7938	24.0337	14.081	13.2943	8.18205	7.01993
68.04	59.7154	60.9544	38.7384	40.3138	23.8032	24.034	14.0645	13.2947	8.25237	7.02024
69.04	59.7838	60.9544	38.807	40.3139	23.8245	24.0343	14.0572	13.295	8.30195	7.02051
70.04	59.8197	60.9544	38.8394	40.314	23.8343	24.0346	14.0353	13.2954	8.33932	7.02076
71.04	59.846	60.9544	38.8415	40.3141	23.8477	24.0348	14.0263	13.2956	8.37984	7.02097
72.04	59.8607	60.9544	38.8761	40.3141	23.8629	24.035	14.0319	13.2959	8.42904	7.02116
73.04	59.8901	60.9544	38.9323	40.3142	23.8863	24.0352	14.0185	13.2961	8.4575	7.02134
74.04	59.9029	60.9544	38.9864	40.3142	23.8883	24.0354	14.0063	13.2963	8.45824	7.02149
75.04	59.9491	60.9544	39.0055	40.3143	23.866	24.0355	14.0499	13.2965	8.47808	7.02162
76.04	60.021	60.9544	39.0224	40.3143	23.847	24.0356	14.0719	13.2966	8.50296	7.02174
77.04	60.0979	60.9544	39.0692	40.3143	23.8645	24.0357	14.0744	13.2967	8.53393	7.02185
78.04	60.1809	60.9544	39.1406	40.3144	23.8968	24.0358	14.0685	13.2969	8.54422	7.02195
79.04	60.2322	60.9544	39.1918	40.3144	23.9005	24.0359	14.055	13.297	8.5551	7.02203
80.04	60.2629	60.9545	39.2265	40.3144	23.9319	24.0359	14.0621	13.2971	8.567	7.02211
81.04	60.315	60.9545	39.2607	40.3144	23.9548	24.036	14.0604	13.2971	8.5703	7.02217
82.04	60.3425	60.9545	39.2958	40.3144	23.9521	24.0361	14.0339	13.2972	8.57074	7.02223
83.04	60.3904	60.9545	39.3248	40.3144	23.919	24.0361	14.0015	13.2973	8.566	7.02229
84.04	60.4261	60.9545	39.3507	40.3144	23.8944	24.0361	14.0033	13.2973	8.54797	7.02234
85.04	60.444	60.9545	39.3845	40.3144	23.9149	24.0362	14.0134	13.2974	8.54424	7.02238
86.04	60.4636	60.9545	39.4241	40.3144	23.9155	24.0362	14.0424	13.2974	8.52687	7.02241
87.04	60.4929	60.9545	39.4513	40.3145	23.9154	24.0362	14.0434	13.2975	8.51027	7.02245
88.04	60.5031	60.9545	39.4794	40.3145	23.902	24.0363	14.011	13.2975	8.50707	7.02248
89.04	60.485	60.9545	39.5011	40.3145	23.8795	24.0363	14.01	13.2975	8.53613	7.0225
90.04	60.4854	60.9545	39.5322	40.3145	23.865	24.0363	14.0274	13.2975	8.49481	7.02253
91.04	60.5289	60.9545	39.5629	40.3145	23.845	24.0363	13.9864	13.2976	8.46706	7.02255
92.04	60.5557	60.9545	39.5948	40.3145	23.7987	24.0363	13.9554	13.2976	8.49557	7.02257
93.04	60.5518	60.9545	39.6086	40.3145	23.775	24.0363	13.9114	13.2976	8.55464	7.02258
94.04	60.5471	60.9545	39.6069	40.3145	23.768	24.0363	13.8583	13.2976	8.54383	7.0226
95.04	60.5256	60.9545	39.6065	40.3145	23.7584	24.0363	13.8436	13.2976	8.51014	7.02261
96.04	60.5565	60.9545	39.6204	40.3145	23.7332	24.0364	13.818	13.2977	8.45726	7.02262
97.04	60.5421	60.9545	39.6135	40.3145	23.7014	24.0364	13.794	13.2977	8.45343	7.02263
98.04	60.5569	60.9545	39.6182	40.3145	23.662	24.0364	13.7659	13.2977	8.45703	7.02264
99.04	60.5799	60.9545	39.6294	40.3145	23.6212	24.0364	13.7819	13.2977	8.4596	7.02265
100.04	60.6268	60.9545	39.631	40.3145	23.5834	24.0364	13.8033	13.2977	8.39874	7.02266
101.04	60.6663	60.9545	39.6325	40.3145	23.5508	24.0364	13.7785	13.2977	8.41066	7.02267
102.04	60.6565	60.9545	39.6005	40.3145	23.5557	24.0364	13.7252	13.2977	8.31254	7.02267
103.04	60.6211	60.9545	39.4913	40.3145	23.3901	24.0364	13.6543	13.2977	8.3783	7.02268
104.04	60.6404	60.9545	39.6111	40.3145	23.5044	24.0364	13.6517	13.2977	8.35146	7.02268
105.04	60.6152	60.9545	39.6035	40.3145	23.505	24.0364	13.6241	13.2977	8.27107	7.02269
106.04	60.547	60.9545	39.5504	40.3145	23.4535	24.0364	13.619	13.2977	8.26037	7.02269
107.04	60.4835	60.9545	39.4981	40.3145	23.4227	24.0364	13.5795	13.2977	8.26968	7.02269
108.04	60.4952	60.9545	39.4353	40.3145	23.3974	24.0364	13.5483	13.2977	8.24172	7.0227
109.04	60.492	60.9545	39.3769	40.3145	23.3746	24.0364	13.5063	13.2977	8.23784	7.0227
110.04	60.4851	60.9545	39.3589	40.3145	23.3404	24.0364	13.5554	13.2977	8.23085	7.0227
111.04	60.4852	60.9545	39.3397	40.3145	23.3373	24.0364	13.5743	13.2977	8.18656	7.0227
112.04	60.4854	60.9545	39.3363	40.3145	23.3323	24.0364	13.5623	13.2977	8.17877	7.0227
113.04	60.5077	60.9545	39.34	40.3145	23.3528	24.0364	13.5884	13.2977	8.19737	7.02271
114.04	60.5567	60.9545	39.3619	40.3145	23.3763	24.0364	13.6194	13.2977	8.22874	7.02271
115.04	60.6195	60.9545	39.4027	40.3145	23.4168	24.0364	13.6637	13.2977	8.2657	7.02271
116.04	60.6586	60.9545	39.45	40.3145	23.4347	24.0364	13.693	13.2977	8.28026	7.02271
117.04	60.6946	60.9545	39.426	40.3145	23.4333	24.0364	13.7184	13.2977	8.28355	7.02271
118.04	60.6851	60.9545	39.4293	40.3145	23.4498	24.0364	13.7025	13.2977	8.31202	7.02271
119.04	60.7361	60.9545	39.6396	40.3145	23.7015	24.0364	14.0916	13.2977	8.3061	7.02271
120.04	60.5896	60.9545	37.8837	40.3145	22.2895	24.0364	13.0632	13.2977	8.0868	6.91528
121.04	62.1407	60.0218	39.4252	37.5715	23.6304	22.401	12.7319	11.9114	7.48106	6.19433
122.04	51.3614	53.7642	31.1737	33.6544	18.7471	20.0655	10.5097	10.6696	6.45646	5.54854
123.04	43.4404	48.159	26.4918	30.1458	16.0319	17.9736	9.26536	9.5572	5.75674	4.97007
124.04	36.8973	43.1381	22.7043	27.0029	13.7917	16.0998	8.11065	8.56081	5.13845	4.45191
125.04	31.8018	38.6407	19.8373	24.1877	12.1263	14.4213	7.26308	7.6683	4.78279	3.98778
126.04	27.8792	34.6122	17.4433	21.666	10.8249	12.9178	6.5639	6.86883	4.34706	3.57203
127.04	24.622	31.0037	15.6483	19.4072	9.79791	11.571	6.08401	6.15272	4.11379	3.19963
128.04	22.1926	27.7714	14.2355	17.3839	9.03588	10.3647	5.73596	5.51127	3.95723	2.86604
129.04	20.1487	24.8761	12.9598	15.5715	8.32855	9.28411	5.37138	4.93669	3.70783	2.56724
130.04	18.5222	22.2826	12.0773	13.9481	7.817	8.31619	5.12141	4.42201	3.59933	2.29959
131.04	17.1959	19.9595	11.2921	12.494	7.34711	7.44918	4.89101	3.96099	3.47089	2.05984
132.04	16.1026	17.8786	10.6009	11.1914	6.88641	6.67256	4.64914	3.54804	3.29507	1.84509
133.04	15.1487	16.0147	10.0843	10.0246	6.60844	5.97691	4.46374	3.17813	3.24401	1.65273
134.04	14.4441	14.3451	9.64676	8.97951	6.40101	5.35379	4.37999	2.84679	3.24803	1.48042
135.04	13.8199	12.8495	9.27022	8.04335	6.18939	4.79562	4.25237	2.55	3.1629	1.32608
136.04	13.3072	11.5099	8.98278	7.20478	5.97571	4.29565	4.11836	2.28414	3.08601	1.18783
137.04	12.8543	10.3099	8.75737	6.45365	5.83497	3.84781	3.99555	2.04601	3.0541	1.06399
138.04	12.4198	9.23506	8.45794	5.78082	5.64695	3.44665	3.9853	1.8327	3.05167	0.953061
139.04	12.0867	8.27226	8.27111	5.17814	5.54489	3.08732	3.94501	1.64163	2.95332	0.853698
140.04	11.7878	7.40983	8.10166	4.63829	5.40677	2.76545	3.88087	1.47048	2.90589	0.764695
141.04	11.5554	6.63731	7.93431	4.15472	5.3456	2.47713	3.77306	1.31717	2.87363	0.68497
142.04	11.2971	5.94534	7.79603	3.72157	5.26473	2.21888	3.67305	1.17985	2.83953	0.613558
143.04	11.08	5.3255	7.67114	3.33357	5.16718	1.98754	3.64905	1.05684	2.80631	0.549591
144.04	10.9128	4.77029	7.55356	2.98603	5.11171	1.78033	3.61968	0.946659	2.80092	0.492292
145.04	10.7629	4.27296	7.50566	2.67472	5.03451	1.59472	3.57621	0.847964	2.79946	0.440968
146.04	10.5947	3.82748	7.42235	2.39586	4.96448	1.42846	3.53858	0.759558	2.76752	0.394994
147.04	10.4226	3.42845	7.32608	2.14608	4.91393	1.27953	3.50299	0.68037	2.71535	0.353813
148.04	10.2647	3.07101	7.23439	1.92233	4.88083	1.14613	3.41579	0.609437	2.65855	0.316926
149.04	10.1319	2.75084	7.1545	1.72192	4.84508	1.02664	3.39359	0.545899	2.6544	0.283885
150.04	10.0175	2.46405	7.11767	1.5424	4.80481	0.919609	3.4261	0.488986	2.67288	0.254288
151.04	9.95582	2.20715	7.05939	1.38159	4.76481	0.823734	3.43384	0.438006	2.67124	0.227777
152.04	9.90387	1.97704	6.98228	1.23755	4.7334	0.737855	3.40016	0.392341	2.64124	0.20403
153.04	9.81199	1.77092	6.92033	1.10853	4.72379	0.660929	3.37251	0.351437	2.61675	0.182758
154.04	9.71051	1.58629	6.8615	0.99296	4.68606	0.592023	3.34563	0.314797	2.57788	0.163705
155.04	9.63035	1.42091	6.83122	0.889437	4.65421	0.530301	3.33687	0.281978	2.53327	0.146637
156.04	9.55348	1.27277	6.78928	0.796708	4.61229	0.475013	3.33448	0.25258	2.51712	0.131349
157.04	9.50817	1.14008	6.73932	0.713646	4.58216	0.42549	3.30134	0.226247	2.5175	0.117655
158.04	9.43621	1.02122	6.65919	0.639244	4.54243	0.38113	3.26383	0.202659	2.50772	0.105389
159.04	9.32965	0.91475	6.59796	0.572599	4.51588	0.341395	3.22839	0.181531	2.48273	0.0944016
160.04	9.23543	0.819382	6.56692	0.512902	4.4864	0.305802	3.20194	0.162605	2.47347	0.0845597
161.04	9.1859	0.733956	6.55967	0.459428	4.46236	0.273921	3.17885	0.145652	2.46027	0.0757438
162.04	9.14215	0.657436	6.54434	0.41153	4.4357	0.245363	3.17429	0.130467	2.45615	0.067847
163.04	9.12418	0.588895	6.47954	0.368626	4.40879	0.219782	3.15797	0.116865	2.4662	0.0607735
164.04	9.04879	0.527499	6.4008	0.330194	4.37223	0.196868	3.12743	0.104681	2.42917	0.0544375
165.04	8.97059	0.472504	6.34525	0.295769	4.34802	0.176344	3.08329	0.0937675	2.39871	0.0487621
166.04	8.8984	0.423242	6.30908	0.264933	4.31208	0.157959	3.0772	0.0839917	2.39226	0.0436783
167.04	8.87254	0.379116	6.28505	0.237312	4.30891	0.14149	3.08195	0.075235	2.40534	0.0391246
168.04	8.84653	0.339591	6.26319	0.212571	4.28072	0.126739	3.05503	0.0673913	2.38516	0.0350456
169.04	8.7827	0.304187	6.20189	0.190409	4.25887	0.113526	3.0293	0.0603653	2.35468	0.0313919
170.04	8.72059	0.272473	6.17587	0.170558	4.23755	0.10169	3.02266	0.0540719	2.34956	0.0281191
171.04	8.6698	0.244066	6.13243	0.152776	4.23168	0.0910882	3.05602	0.0484345	2.35678	0.0251875
172.04	8.63551	0.218621	6.12314	0.136848	4.22075	0.0815917	3.08071	0.0433849	2.3607	0.0225615
173.04	8.58661	0.195828	6.11302	0.122581	4.21406	0.0730852	3.08	0.0388618	2.35932	0.0202093
174.04	8.55355	0.175412	6.11147	0.109801	4.21072	0.0654656	3.04603	0.0348102	2.37016	0.0181024
175.04	8.51824	0.157124	6.08095	0.0983536	4.18325	0.0586404	3.00266	0.031181	2.3314	0.0162151
176.04	8.44606	0.140743	6.03122	0.0880997	4.17102	0.0525268	2.9864	0.0279302	2.3069	0.0145246
177.04	8.40504	0.12607	5.98877	0.0789147	4.16965	0.0470506	2.97563	0.0250183	2.29789	0.0130103
178.04	8.34958	0.112926	5.98202	0.0706874	4.15657	0.0421452	2.95237	0.02241	2.2795	0.0116539
179.04	8.32723	0.101153	5.96552	0.0633178	4.12055	0.0377513	2.94679	0.0200736	2.28124	0.0104389
180.04	8.29723	0.0906069	5.94155	0.0567165	4.08486	0.0338155	2.93315	0.0179808	2.25993	0.00935058
181.04	8.2452	0.0811606	5.91161	0.0508034	4.04703	0.03029	2.90132	0.0161062	2.23897	0.00837572
182.04	8.1941	0.0726991	5.8822	0.0455069	4.01582	0.0271321	2.86384	0.014427	2.2382	0.0075025
183.04	8.14684	0.0651197	5.85439	0.0407625	3.98981	0.0243034	2.84892	0.0129229	2.23737	0.00672032
184.04	8.12066	0.0583306	5.83509	0.0365127	3.96051	0.0217696	2.85243	0.0115756	2.24558	0.00601968
185.04	8.0702	0.0522493	5.79725	0.032706	3.93931	0.0195	2.8344	0.0103688	2.24559	0.00539209
186.04	8.01113	0.046802	5.76716	0.0292962	3.94609	0.017467	2.82406	0.00928777	2.22585	0.00482993
187.04	7.97653	0.0419226	5.77291	0.0262419	3.95372	0.015646	2.83649	0.00831946	2.23175	0.00432638
188.04	7.97536	0.0375519	5.77392	0.023506	3.97622	0.0140148	2.8518	0.00745211	2.21722	0.00387533
189.04	7.96551	0.0336368	5.76353	0.0210554	3.96738	0.0125536	2.85211	0.00667518	2.20792	0.0034713
190.04	7.9441	0.03013	5.73947	0.0188602	3.94489	0.0112448	2.83634	0.00597925	2.19765	0.0031094
191.04	7.89684	0.0269887	5.69307	0.0168939	3.92153	0.0100725	2.79572	0.00535587	2.1764	0.00278522
192.04	7.84489	0.024175	5.66512	0.0151326	3.90453	0.00902238	2.77406	0.00479749	2.16366	0.00249484
193.04	7.79059	0.0216546	5.64748	0.013555	3.90181	0.00808174	2.76182	0.00429732	2.15793	0.00223474
194.04	7.76637	0.019397	5.62908	0.0121418	3.90668	0.00723917	2.75782	0.0038493	2.13413	0.00200176
195.04	7.72418	0.0173747	5.60262	0.0108759	3.90422	0.00648444	2.76437	0.00344798	2.13522	0.00179306
196.04	7.70074	0.0155633	5.58139	0.00974203	3.89306	0.0058084	2.73581	0.00308851	2.11051	0.00160612
197.04	7.64371	0.0139407	5.55908	0.00872636	3.85278	0.00520283	2.70079	0.00276651	2.10445	0.00143867
198.04	7.61285	0.0124873	5.5533	0.00781658	3.8388	0.00466041	2.67493	0.00247809	2.08168	0.00128868
199.04	7.57684	0.0111854	5.53205	0.00700165	3.81239	0.00417453	2.65439	0.00221973	2.06843	0.00115433
200.04	7.56676	0.0100193	5.54111	0.00627169	3.79505	0.00373931	2.65626	0.00198831	2.08382	0.00103398
201.04	7.54559	0.00897471	5.53606	0.00561783	3.78094	0.00334946	2.66859	0.00178102	2.09741	0.000926184
202.04	7.52739	0.00803904	5.53584	0.00503213	3.76744	0.00300026	2.69331	0.00159533	2.12208	0.000829624
203.04	7.53465	0.00720092	5.52416	0.0045075	3.76544	0.00268746	2.68188	0.00142901	2.11788	0.00074313
204.04	7.49637	0.00645018	5.4959	0.00403756	3.75804	0.00240728	2.67366	0.00128003	2.11775	0.000665654
205.04	7.45582	0.00577771	5.47709	0.00361662	3.73993	0.0021563	2.66948	0.00114658	2.11422	0.000596256
206.04	7.43122	0.00517534	5.44638	0.00323957	3.74484	0.0019315	2.66358	0.00102704	2.10955	0.000534092
207.04	7.38707	0.00463578	5.44126	0.00290182	3.73215	0.00173013	2.68446	0.000919963	2.12237	0.00047841
208.04	7.402	0.00415247	5.43264	0.00259929	3.72283	0.00154975	2.6962	0.000824051	2.12602	0.000428532
209.04	7.37762	0.00371955	5.40653	0.0023283	3.72453	0.00138818	2.69171	0.000738139	2.12108	0.000383855
210.04	7.35621	0.00333176	5.35311	0.00208556	3.72337	0.00124345	2.68408	0.000661183	2.08965	0.000343836
211.04	7.3073	0.00298441	5.32372	0.00186812	3.71703	0.00111381	2.67124	0.00059225	2.07889	0.000307989
212.04	7.26286	0.00267326	5.30819	0.00167336	3.71127	0.000997692	2.64932	0.000530505	2.05508	0.000275879
213.04	7.25309	0.00239456	5.29942	0.0014989	3.67477	0.000893676	2.66538	0.000475196	2.04424	0.000247117
214.04	7.24176	0.00214491	5.30775	0.00134263	3.66161	0.000800505	2.67673	0.000425654	2.05214	0.000221353
215.04	7.23356	0.00192129	5.32241	0.00120265	3.65556	0.000717047	2.68479	0.000381277	2.06168	0.000198276
216.04	7.2402	0.00172098	5.3345	0.00107727	3.66726	0.00064229	2.69921	0.000341526	2.06604	0.000177604
217.04	7.22536	0.00154156	5.33228	0.000964958	3.65528	0.000575327	2.70509	0.00030592	2.06378	0.000159088
218.04	7.23199	0.00138084	5.33819	0.000864355	3.64634	0.000515346	2.67682	0.000274026	2.04133	0.000142502
219.04	7.19441	0.00123688	5.32677	0.00077424	3.62828	0.000461618	2.68655	0.000245457	2.0542	0.000127645
220.04	7.17614	0.00110793	5.31556	0.000693521	3.62372	0.000413491	2.69407	0.000219867	2.06081	0.000114338
221.04	7.15348	0.00099242	5.31428	0.000621217	3.61775	0.000370382	2.69971	0.000196944	2.06332	0.000102417
222.04	7.13231	0.000888954	5.29887	0.000556451	3.62188	0.000331768	2.69984	0.000176411	2.05659	9.17395e-05
223.04	7.11411	0.000796275	5.28181	0.000498438	3.63254	0.000297179	2.6836	0.000158019	2.07073	8.21751e-05
224.04	7.09168	0.000713258	5.25119	0.000446472	3.63122	0.000266196	2.65642	0.000141545	2.06101	7.36078e-05
225.04	7.06489	0.000638897	5.21108	0.000399925	3.60751	0.000238443	2.60659	0.000126788	2.02915	6.59337e-05
226.04	7.03114	0.000572288	5.16567	0.00035823	3.575	0.000213584	2.59046	0.00011357	2.02475	5.90597e-05
227.04	6.98161	0.000512623	5.14025	0.000320882	3.54958	0.000191317	2.58056	0.000101729	2.03074	5.29024e-05
228.04	6.94293	0.000459179	5.10595	0.000287428	3.53841	0.000171371	2.58384	9.11233e-05	2.02464	4.7387e-05
229.04	6.90504	0.000411307	5.08299	0.000257462	3.51067	0.000153504	2.56368	8.16231e-05	2.01409	4.24466e-05
230.04	6.84488	0.000368425	5.02327	0.00023062	3.49197	0.0001375	2.55206	7.31134e-05	1.97055	3.80212e-05
231.04	6.80379	0.000330015	4.96661	0.000206577	3.47906	0.000123165	2.53023	6.54908e-05	1.93565	3.40573e-05
232.04	6.77574	0.000295608	4.96392	0.00018504	3.46817	0.000110324	2.4986	5.8663e-05	1.92413	3.05066e-05
233.04	6.74644	0.000264789	4.96572	0.000165748	3.46684	9.88224e-05	2.50415	5.2547e-05	1.93492	2.73261e-05
234.04	6.74645	0.000237183	4.99127	0.000148468	3.48419	8.85195e-05	2.49978	4.70687e-05	1.94601	2.44772e-05
235.04	6.72887	0.000212456	5.00314	0.000132989	3.49762	7.92908e-05	2.48915	4.21615e-05	1.96433	2.19253e-05
236.04	6.71434	0.000190306	5.01025	0.000119124	3.49184	7.10242e-05	2.48228	3.77659e-05	1.95679	1.96394e-05
237.04	6.70238	0.000170465	5.01287	0.000106705	3.49603	6.36195e-05	2.47932	3.38285e-05	1.95449	1.75919e-05
238.04	6.70106	0.000152693	5.00864	9.55801e-05	3.4918	5.69868e-05	2.4725	3.03017e-05	1.9467	1.57578e-05
239.04	6.68473	0.000136774	4.99658	8.56152e-05	3.47153	5.10455e-05	2.46938	2.71426e-05	1.9398	1.4115e-05
240.04	6.70426	0.000122514	5.027	7.66893e-05	3.49054	4.57237e-05	2.42382	2.43128e-05	1.91385	1.26434e-05
241.04	6.70074	0.000109741	5.0784	6.8694e-05	3.44976	4.09567e-05	2.4396	2.1778e-05	1.93135	1.13252e-05
	6.66668	9.83002e-05

## Sheet: biotin-C3d ISG65ΔL2
Cycle: 9 ISG65dL2 5000 nM_X	Cycle: 10 ISG65dL2 5000 nM_Y	Fitted Cycle: 10 ISG65dL2 5000_Y	Cycle: 11 ISG65dL2 2500 nM_Y	Fitted Cycle: 11 ISG65dL2 2500_Y	Cycle: 12 ISG65dL2 1250 nM_Y	Fitted Cycle: 12 ISG65dL2 1250_Y	Cycle: 13 ISG65dL2 625 nM_Y	Fitted Cycle: 13 ISG65dL2 625 _Y	Cycle: 14 ISG65dL2 312.5 nM_Y	Fitted Cycle: 14 ISG65dL2 312._Y
-59.88	0.669495	0	0.082763	0	0.983154	0	0.122802	0	0.402526	0
-58.88	0.669495	0	0.100341	0	0.983154	0	0.132568	0	0.424011	0
-57.88	0.657776	0	0.0808098	0	0.983154	0	0.140381	0	0.410339	0
-56.88	0.667542	0	0.081591	0	0.9937	0	0.141943	0	0.412096	0
-55.88	0.690979	0	0.102294	0	1.0144	0	0.132568	0	0.424011	0
-54.88	0.698792	0	0.0991695	0	1.01128	0	0.126318	0	0.395495	0
-53.88	0.690979	0	0.0780759	0	1.01948	0	0.113428	0	0.384167	0
-52.88	0.689026	0	0.0776851	0	0.99956	0	0.126318	0	0.38573	0
-51.88	0.689026	0	0.0729973	0	0.994872	0	0.152099	0	0.382995	0
-50.88	0.689026	0	0.0476071	0	1.00073	0	0.154053	0	0.364441	0
-49.88	0.67926	0	0.0495591	0	0.990965	0	0.179443	0	0.390807	0
-48.88	0.737854	0	0.0718254	0	0.974169	0	0.173193	0	0.363268	0
-47.88	0.739807	0	0.0964345	0	0.989013	0	0.161865	0	0.352721	0
-46.88	0.759338	0	0.141357	0	1.00268	0	0.142334	0	0.351745	0
-45.88	0.757385	0	0.108155	0	0.971436	0	0.128662	0	0.315613	0
-44.88	0.730042	0	0.0827637	0	0.955811	0	0.0974121	0	0.295105	0
-43.88	0.690979	0	0.0612786	0	0.973388	0	0.0915525	0	0.322448	0
-42.88	0.698792	0	0.081591	0	0.983935	0	0.143896	0	0.333971	0
-41.88	0.690979	0	0.0956533	0	1.02729	0	0.179834	0	0.360729	0
-40.88	0.698792	0	0.116748	0	1.03862	0	0.173193	0	0.393542	0
-39.88	0.67926	0	0.119872	0	1.03198	0	0.20874	0	0.410338	0
-38.88	0.687073	0	0.115966	0	1.03003	0	0.183349	0	0.40155	0
-37.88	0.713806	0	0.110887	0	1.05425	0	0.147009	0	0.422044	0
-36.88	1.43512	0	0.979706	0	1.17136	0	0.760671	0	0.653107	0
-35.88	0.217834	0	0.0483837	0	0.313826	0	-0.197109	0	-0.197466	0
-34.88	-1.09747	0	-0.716634	0	-0.687398	0	-0.0990872	0	-0.103872	0
-33.88	0.164429	0	0.0415184	0	0.0830223	0	0.11764	0	0.010421	0
-32.88	0.0924683	0	0.00727588	0	0.0635503	0	0.0753419	0	0.00898486	0
-31.88	0.0858765	0	0.0308104	0	0.0737791	0	0.0865234	0	-0.0156374	0
-30.88	0.0827026	0	0.0367061	0	0.0730221	0	0.0748778	0	-0.0462101	0
-29.88	-0.0449219	0	0.0307237	0	-0.032936	0	0.0781123	0	-0.0418776	0
-28.88	-0.173828	0	-0.0216683	0	-0.111146	0	0.102661	0	-0.0472725	0
-27.88	-0.0563965	0	-0.0344613	0	-0.0325081	0	0.0930662	0	-0.0566475	0
-26.88	-0.0317383	0	-0.0141371	0	-0.0317153	0	0.0911128	0	-0.0209426	0
-25.88	-0.0234985	0	-0.0154189	0	-0.0146865	0	0.1151	0	0.00978857	0
-24.88	-0.00549316	0	0.0150009	0	0.0201278	0	0.149145	0	0.0210128	0
-23.88	0.0175171	0	0.0585193	0	0.0259876	0	0.162756	0	0.0274219	0
-22.88	-0.0198364	0	0.057677	0	-0.00915653	0	0.139465	0	0.022185	0
-21.88	-0.0297852	0	0.0355821	0	-0.00964493	0	0.105896	0	0.0167528	0
-20.88	-0.0172729	0	-0.0109739	0	-0.0234861	0	0.0718018	0	-0.0197325	0
-19.88	-0.0450439	0	-0.0610244	0	-0.041127	0	0.0465937	0	-0.0242507	0
-18.88	-0.0595703	0	-0.082167	0	-0.0704483	0	0.0058955	0	-0.0356582	0
-17.88	-0.0744019	0	-0.0675186	0	-0.0655655	0	-0.0385381	0	-0.0296463	0
-16.88	-0.0793457	0	-0.0776874	0	-0.0771991	0	-0.0467291	0	-0.0351458	0
-15.88	-0.0789795	0	-0.0648458	0	-0.0921896	0	-0.0591315	0	-0.0175436	0
-14.88	-0.0708008	0	-0.0707782	0	-0.0817035	0	-0.0498785	0	-0.0167926	0
-13.88	-0.0726929	0	-0.0614896	0	-0.0771146	0	-0.0289804	0	-0.0115324	0
-12.88	-0.0380249	0	-0.0498801	0	-0.0495139	0	-0.0146736	0	-0.000411138	0
-11.88	-0.0106201	0	-0.058242	0	-0.0383445	0	-0.004969	0	0.00932395	0
-10.88	-0.00549316	0	-0.0631001	0	-0.0396626	0	-0.0115119	0	-0.0062153	0
-9.88	0.00427246	0	-0.056948	0	-0.0452292	0	-0.014344	0	-0.00845553	0
-8.88	0.0143433	0	-0.0531757	0	-0.0398701	0	-0.0114386	0	-0.0124653	0
-7.88	0.015564	0	-0.0475852	0	-0.0452658	0	-0.0109382	0	-0.0163352	0
-6.88	0.00579834	0	-0.0143337	0	-0.0317897	0	-0.00217372	0	0.00196269	0
-5.88	0.019104	0	0.0327124	0	0.0154394	0	0.01361	0	0.000790998	0
-4.88	0.0322876	0	0.0455425	0	0.0361431	0	0.00277033	0	-0.0063374	0
-3.88	0.0350952	0	0.0381704	0	0.0796132	0	-0.0175907	0	-0.0130686	0
-2.88	0.0292969	0	0.0399937	0	0.0946812	0	0.0134126	0	0.045792	0
-1.88	0.074585	0	-0.0820724	0	0.164388	0	-0.285312	0	0.154591	0
-0.880005	0.0733032	0	-0.310625	0	0.399397	0	0.14361	0	0.217909	0
0.119995	0.144043	0	1.42802	0	1.12651	0	0.961704	0.240329	1.1883	0.218949
1.12	3.78833	5.00538	5.15497	5.48766	3.56897	2.7629	2.73206	2.10116	1.61762	1.14031
2.12	21.8145	18.7225	15.3463	12.122	7.99544	6.15949	4.74286	3.73091	2.69121	1.95121
3.12	37.9485	29.9397	24.0672	17.7641	12.3416	9.10526	6.74242	5.15827	3.63395	2.6649
4.12	48.7127	39.1125	30.2521	22.5623	15.3582	11.6601	8.17362	6.40837	4.38958	3.29304
5.12	55.7491	46.6136	34.3551	26.643	17.6457	13.8758	9.19162	7.50322	4.84024	3.84587
6.12	60.5328	52.7476	37.1406	30.1133	19.3259	15.7974	10.072	8.46212	5.27452	4.33242
7.12	63.8552	57.7636	39.1495	33.0647	20.7055	17.464	10.895	9.30193	5.74072	4.76065
8.12	66.403	61.8655	40.6051	35.5746	21.8918	18.9093	11.5176	10.0375	6.12925	5.13754
9.12	68.2515	65.2198	41.6839	37.7092	22.7968	20.1629	12.0372	10.6816	6.48193	5.46924
10.12	69.693	67.9628	42.527	39.5245	23.6112	21.25	12.59	11.2458	6.87949	5.76119
11.12	70.9323	70.2059	43.2023	41.0683	24.2942	22.1929	13.0712	11.7399	7.18477	6.01813
12.12	71.9621	72.0401	43.8552	42.3812	24.8757	23.0106	13.4278	12.1727	7.47782	6.24427
13.12	72.7519	73.5401	44.3564	43.4978	25.4047	23.7198	13.6823	12.5517	7.64856	6.4433
14.12	73.35	74.7667	44.8196	44.4473	25.7713	24.3349	13.9395	12.8837	7.78664	6.61847
15.12	73.8729	75.7698	45.2314	45.2549	26.0586	24.8683	14.1595	13.1744	7.87138	6.77264
16.12	74.2783	76.59	45.5869	45.9417	26.3465	25.331	14.3484	13.429	8.06416	6.90833
17.12	74.6921	77.2608	45.8734	46.5257	26.5874	25.7322	14.5763	13.652	8.15646	7.02775
18.12	75.0205	77.8093	46.1049	47.0224	26.7762	26.0802	14.7582	13.8473	8.29418	7.13286
19.12	75.3066	78.2578	46.3422	47.4449	26.9315	26.3819	14.918	14.0184	8.40952	7.22536
20.12	75.593	78.6246	46.6368	47.8041	27.0674	26.6437	15.0115	14.1682	8.52838	7.30677
21.12	75.8444	78.9245	46.8482	48.1096	27.2216	26.8707	15.0842	14.2994	8.63923	7.37843
22.12	76.1203	79.1698	46.9453	48.3695	27.4009	27.0676	15.2098	14.4143	8.72606	7.44149
23.12	76.359	79.3704	47.0847	48.5904	27.4907	27.2383	15.2213	14.515	8.72626	7.49699
24.12	76.4275	79.5344	47.1866	48.7784	27.5695	27.3864	15.3292	14.6031	8.80226	7.54584
25.12	76.65	79.6686	47.293	48.9382	27.7004	27.5148	15.4676	14.6803	8.85955	7.58884
26.12	76.8246	79.7783	47.4712	49.0741	27.7596	27.6262	15.4897	14.7479	8.8529	7.62667
27.12	77.0109	79.8679	47.5504	49.1897	27.8243	27.7228	15.5031	14.8071	8.85888	7.65998
28.12	77.1301	79.9413	47.5858	49.288	27.89	27.8065	15.5806	14.859	8.94549	7.68929
29.12	77.2778	80.0013	47.7366	49.3716	27.9721	27.8792	15.6511	14.9044	8.96377	7.71508
30.12	77.4523	80.0503	47.8561	49.4427	28.0327	27.9422	15.7397	14.9442	9.05684	7.73779
31.12	77.5597	80.0904	47.9568	49.5031	28.1175	27.9969	15.8027	14.979	9.10909	7.75777
32.12	77.682	80.1232	48.0015	49.5545	28.159	28.0442	15.8022	15.0095	9.0476	7.77536
33.12	77.6925	80.15	48.0097	49.5983	28.1995	28.0853	15.8232	15.0363	9.08947	7.79083
34.12	77.7644	80.172	48.1009	49.6355	28.2096	28.121	15.8808	15.0597	9.17604	7.80446
35.12	77.9519	80.1899	48.211	49.6671	28.2443	28.1519	15.9438	15.0802	9.23705	7.81645
36.12	78.0306	80.2046	48.2912	49.694	28.2819	28.1787	15.95	15.0981	9.23582	7.827
37.12	78.0753	80.2166	48.3664	49.7169	28.3243	28.202	15.9857	15.1138	9.30284	7.83628
38.12	78.2019	80.2264	48.4372	49.7363	28.4052	28.2222	16.0259	15.1276	9.3577	7.84446
39.12	78.3112	80.2344	48.486	49.7528	28.467	28.2396	16.0624	15.1397	9.39833	7.85165
40.12	78.3864	80.241	48.5286	49.7669	28.4969	28.2548	16.0747	15.1502	9.40482	7.85798
41.12	78.4377	80.2463	48.5665	49.7789	28.5145	28.268	16.0874	15.1595	9.41522	7.86356
42.12	78.4761	80.2507	48.5772	49.7891	28.5222	28.2794	16.1091	15.1676	9.40808	7.86846
43.12	78.496	80.2543	48.5984	49.7977	28.568	28.2893	16.1351	15.1747	9.4171	7.87278
44.12	78.5534	80.2572	48.6433	49.8051	28.623	28.2979	16.1667	15.1809	9.43755	7.87657
45.12	78.661	80.2596	48.6786	49.8113	28.6858	28.3053	16.1997	15.1863	9.48147	7.87992
46.12	78.7546	80.2616	48.7065	49.8166	28.7022	28.3118	16.2154	15.1911	9.50733	7.88286
47.12	78.7921	80.2632	48.7469	49.8212	28.7083	28.3174	16.2278	15.1953	9.53032	7.88545
48.12	78.8016	80.2645	48.7684	49.825	28.7138	28.3222	16.2468	15.1989	9.5457	7.88773
49.12	78.8491	80.2656	48.8015	49.8283	28.7468	28.3264	16.2737	15.2022	9.56348	7.88974
50.12	78.8965	80.2664	48.8073	49.8311	28.8	28.3301	16.3177	15.205	9.59027	7.8915
51.12	78.9719	80.2672	48.832	49.8335	28.8375	28.3332	16.3672	15.2074	9.61791	7.89306
52.12	79.0534	80.2677	48.8777	49.8355	28.8652	28.336	16.3935	15.2096	9.62305	7.89442
53.12	79.0925	80.2682	48.9227	49.8372	28.8825	28.3384	16.413	15.2114	9.64188	7.89563
54.12	79.1597	80.2686	48.9406	49.8386	28.9115	28.3404	16.4383	15.2131	9.66643	7.89669
55.12	79.1987	80.2689	48.9524	49.8399	28.95	28.3422	16.4563	15.2145	9.69389	7.89762
56.12	79.2379	80.2692	48.9505	49.8409	28.9787	28.3438	16.465	15.2158	9.70286	7.89844
57.12	79.2526	80.2694	48.9978	49.8418	28.9903	28.3451	16.4682	15.2169	9.71437	7.89916
58.12	79.2562	80.2696	49.0271	49.8426	29.0045	28.3463	16.4677	15.2179	9.71403	7.8998
59.12	79.282	80.2697	49.0477	49.8432	28.9897	28.3473	16.4752	15.2187	9.71603	7.90036
60.12	79.3328	80.2699	49.065	49.8438	29.0186	28.3482	16.5054	15.2195	9.73145	7.90085
61.12	79.4327	80.2699	49.0866	49.8442	29.0543	28.349	16.5414	15.2201	9.76184	7.90128
62.12	79.4797	80.27	49.1078	49.8446	29.0871	28.3496	16.5627	15.2207	9.7852	7.90166
63.12	79.519	80.2701	49.1389	49.845	29.1097	28.3502	16.5704	15.2212	9.75635	7.902
64.12	79.537	80.2701	49.1737	49.8453	29.1249	28.3507	16.515	15.2216	9.81724	7.90229
65.12	79.631	80.2702	49.2329	49.8455	29.1828	28.3511	16.4827	15.222	9.83753	7.90255
66.12	79.7199	80.2702	49.1961	49.8457	29.1047	28.3515	16.5111	15.2224	9.65727	7.90278
67.12	79.5239	80.2702	48.9578	49.8459	28.8355	28.3518	16.3787	15.2227	9.39908	7.90298
68.12	79.2371	80.2703	48.7197	49.8461	28.5764	28.3521	16.2963	15.2229	9.2259	7.90316
69.12	78.9954	80.2703	48.5322	49.8462	28.3991	28.3523	16.234	15.2231	9.11379	7.90332
70.12	78.8286	80.2703	48.4476	49.8463	28.2964	28.3525	16.2061	15.2233	9.04899	7.90346
71.12	78.7389	80.2703	48.3916	49.8464	28.2598	28.3527	16.1867	15.2235	9.06476	7.90358
72.12	78.7017	80.2703	48.3773	49.8465	28.2289	28.3529	16.1836	15.2237	9.12823	7.90368
73.12	78.7049	80.2703	48.3801	49.8465	28.1993	28.353	16.1619	15.2238	9.20061	7.90378
74.12	78.7377	80.2703	48.4066	49.8466	28.1966	28.3532	16.1693	15.2239	9.27965	7.90386
75.12	78.8049	80.2704	48.4496	49.8466	28.1727	28.3533	16.1898	15.224	9.31355	7.90393
76.12	78.8585	80.2704	48.5104	49.8467	28.1745	28.3533	16.2538	15.2241	9.40709	7.904
77.12	78.9636	80.2704	48.6009	49.8467	28.2077	28.3534	16.3117	15.2242	9.49416	7.90405
78.12	79.0925	80.2704	48.6682	49.8467	28.2523	28.3535	16.324	15.2243	9.50979	7.9041
79.12	79.169	80.2704	48.7023	49.8468	28.2651	28.3535	16.3502	15.2243	9.56807	7.90414
80.12	79.2375	80.2704	48.7712	49.8468	28.2975	28.3536	16.3693	15.2244	9.63987	7.90418
81.12	79.3085	80.2704	48.8268	49.8468	28.321	28.3536	16.3727	15.2244	9.65024	7.90422
82.12	79.3375	80.2704	48.871	49.8468	28.3211	28.3537	16.3749	15.2245	9.67274	7.90425
83.12	79.3754	80.2704	48.93	49.8468	28.3343	28.3537	16.3636	15.2245	9.71359	7.90427
84.12	79.4293	80.2704	48.9945	49.8468	28.338	28.3537	16.3764	15.2245	9.70107	7.90429
85.12	79.4604	80.2704	49.018	49.8469	28.3293	28.3538	16.3748	15.2245	9.66096	7.90432
86.12	79.4699	80.2704	49.0026	49.8469	28.2956	28.3538	16.3508	15.2246	9.6376	7.90433
87.12	79.5042	80.2704	48.9733	49.8469	28.3054	28.3538	16.3326	15.2246	9.6606	7.90435
88.12	79.5483	80.2704	48.976	49.8469	28.3491	28.3538	16.2989	15.2246	9.6822	7.90436
89.12	79.5729	80.2704	48.9772	49.8469	28.3195	28.3538	16.2752	15.2246	9.66994	7.90437
90.12	79.5726	80.2704	49.0025	49.8469	28.2483	28.3539	16.2428	15.2246	9.66378	7.90439
91.12	79.5679	80.2704	49.0054	49.8469	28.2204	28.3539	16.1799	15.2246	9.61934	7.90439
92.12	79.5596	80.2704	49.0252	49.8469	28.1846	28.3539	16.1315	15.2247	9.62349	7.9044
93.12	79.5616	80.2704	49.016	49.8469	28.1473	28.3539	16.1056	15.2247	9.64495	7.90441
94.12	79.5679	80.2704	48.9862	49.8469	28.0995	28.3539	16.0775	15.2247	9.61958	7.90442
95.12	79.571	80.2704	48.9267	49.8469	28.0447	28.3539	16.0256	15.2247	9.58969	7.90442
96.12	79.5336	80.2704	48.8832	49.8469	28.0145	28.3539	15.953	15.2247	9.51783	7.90443
97.12	79.4733	80.2704	48.8227	49.8469	27.9529	28.3539	15.867	15.2247	9.46654	7.90443
98.12	79.3767	80.2704	48.7693	49.8469	27.85	28.3539	15.8483	15.2247	9.4563	7.90444
99.12	79.3358	80.2704	48.7439	49.8469	27.7968	28.3539	15.8168	15.2247	9.43526	7.90444
100.12	79.3229	80.2704	48.7023	49.8469	27.7012	28.3539	15.7188	15.2247	9.39251	7.90444
101.12	79.305	80.2704	48.6359	49.8469	27.607	28.3539	15.6697	15.2247	9.33845	7.90444
102.12	79.228	80.2704	48.5472	49.8469	27.5246	28.3539	15.6256	15.2247	9.26922	7.90445
103.12	79.1577	80.2704	48.4797	49.8469	27.449	28.3539	15.5479	15.2247	9.23477	7.90445
104.12	79.1183	80.2704	48.4343	49.8469	27.3921	28.3539	15.4623	15.2247	9.23859	7.90445
105.12	79.0796	80.2704	48.3942	49.8469	27.3651	28.3539	15.4409	15.2247	9.23984	7.90445
106.12	79.0551	80.2704	48.3804	49.8469	27.3187	28.3539	15.46	15.2247	9.23778	7.90445
107.12	79.0438	80.2704	48.3482	49.8469	27.2884	28.3539	15.4327	15.2247	9.22855	7.90445
108.12	79.0128	80.2704	48.3069	49.8469	27.2452	28.3539	15.4183	15.2247	9.22342	7.90446
109.12	78.9601	80.2704	48.2659	49.8469	27.2351	28.3539	15.4258	15.2247	9.2054	7.90446
110.12	78.9047	80.2704	48.2067	49.8469	27.2004	28.3539	15.3857	15.2247	9.2017	7.90446
111.12	78.862	80.2704	48.1409	49.8469	27.1608	28.3539	15.341	15.2247	9.19893	7.90446
112.12	78.8312	80.2704	48.1114	49.8469	27.12	28.3539	15.3067	15.2247	9.2015	7.90446
113.12	78.8378	80.2704	48.1094	49.8469	27.1095	28.3539	15.3247	15.2247	9.17203	7.90446
114.12	78.8539	80.2704	48.1226	49.8469	27.1362	28.3539	15.3469	15.2247	9.15931	7.90446
115.12	78.9144	80.2704	48.1213	49.8469	27.1578	28.3539	15.3653	15.2247	9.15447	7.90446
116.12	78.9551	80.2704	48.1079	49.8469	27.1771	28.3539	15.3488	15.2247	9.11931	7.90446
117.12	78.9871	80.2704	48.0665	49.8469	27.1618	28.3539	15.2825	15.2247	9.06328	7.90446
118.12	79.0149	80.2704	48.1851	49.8469	27.2281	28.3539	15.475	15.2247	9.13581	7.90446
119.12	79.1111	80.2704	47.9322	49.8469	26.9752	28.3539	14.8216	15.2247	8.97689	7.90446
120.12	79.0963	80.2704	48.1372	49.8469	27.2783	28.3539	15.1513	15.002	8.94725	7.6938
121.12	74.2463	78.1308	41.2745	45.629	23.3414	25.9547	12.5231	13.2684	7.60338	6.80471
122.12	61.7437	69.102	34.7655	40.3562	19.8178	22.9554	10.8133	11.7351	6.73075	6.01836
123.12	51.9301	61.1166	29.3967	35.6926	16.766	20.3027	9.43661	10.379	6.04485	5.32288
124.12	44.2955	54.054	25.3028	31.568	14.5647	17.9565	8.3835	9.17962	5.49364	4.70777
125.12	38.4476	47.8076	22.0453	27.92	12.8727	15.8815	7.55552	8.11883	5.10262	4.16375
126.12	33.8461	42.2829	19.5961	24.6936	11.4788	14.0462	6.86749	7.18062	4.78794	3.68259
127.12	30.1811	37.3967	17.5595	21.84	10.4655	12.423	6.40737	6.35083	4.53188	3.25703
128.12	27.238	33.0752	15.9744	19.3162	9.63336	10.9874	5.98041	5.61693	4.30597	2.88065
129.12	24.9276	29.253	14.661	17.084	8.93562	9.71774	5.61959	4.96784	4.07097	2.54776
130.12	22.8373	25.8726	13.6044	15.1098	8.29729	8.59477	5.33042	4.39376	3.90716	2.25334
131.12	21.2735	22.8828	12.7486	13.3637	7.8162	7.60156	5.07344	3.88602	3.82075	1.99294
132.12	19.9784	20.2384	12.1426	11.8194	7.52182	6.72313	4.96687	3.43696	3.77396	1.76264
133.12	18.9289	17.8997	11.6327	10.4536	7.25218	5.94621	4.86171	3.03978	3.61121	1.55894
134.12	17.9672	15.8312	11.1397	9.24557	6.9799	5.25907	4.73353	2.68851	3.54307	1.37879
135.12	17.1105	14.0018	10.6299	8.17715	6.71695	4.65133	4.5902	2.37782	3.51083	1.21946
136.12	16.3456	12.3837	10.2283	7.23221	6.53577	4.11383	4.48193	2.10304	3.42603	1.07854
137.12	15.7769	10.9527	9.98225	6.39646	6.39747	3.63843	4.39907	1.86001	3.38557	0.9539
138.12	15.2793	9.68699	9.7572	5.65729	6.31464	3.21798	4.33618	1.64507	3.34763	0.843666
139.12	14.8886	8.56757	9.55702	5.00353	6.14412	2.84611	4.22567	1.45496	3.3101	0.746171
140.12	14.4898	7.5775	9.32925	4.42533	6.05697	2.51722	4.12584	1.28682	3.23526	0.659943
141.12	14.1335	6.70185	9.1664	3.91394	5.907	2.22632	4.08816	1.13812	3.20219	0.58368
142.12	13.821	5.92739	8.99637	3.46165	5.81199	1.96905	4.06526	1.0066	3.19428	0.516229
143.12	13.5109	5.24242	8.852	3.06162	5.74617	1.7415	4.03408	0.890273	3.16557	0.456573
144.12	13.2999	4.63661	8.76069	2.70782	5.68288	1.54025	3.97811	0.787392	3.13078	0.403811
145.12	13.0125	4.10081	8.61989	2.3949	5.62819	1.36226	3.95693	0.6964	3.11491	0.357147
146.12	12.8625	3.62692	8.49307	2.11815	5.56033	1.20484	3.924	0.615924	3.11733	0.315875
147.12	12.691	3.20779	8.36837	1.87337	5.48818	1.06561	3.87255	0.544747	3.08483	0.279372
148.12	12.5062	2.8371	8.25994	1.65688	5.42052	0.942463	3.84867	0.481796	3.06368	0.247087
149.12	12.3409	2.50925	8.19033	1.46541	5.40133	0.833551	3.83971	0.426119	3.01095	0.218534
150.12	12.2203	2.21928	8.12279	1.29607	5.38451	0.737225	3.8223	0.376876	2.96227	0.19328
151.12	12.0878	1.96282	8.05729	1.14629	5.35368	0.652031	3.78322	0.333324	2.91016	0.170944
152.12	11.9819	1.73599	7.9926	1.01383	5.28368	0.576682	3.76011	0.294805	2.88939	0.15119
153.12	11.8815	1.53538	7.9462	0.896668	5.20316	0.51004	3.71919	0.260737	2.84623	0.133718
154.12	11.7278	1.35795	7.86517	0.793049	5.11713	0.451099	3.66504	0.230606	2.80933	0.118266
155.12	11.5894	1.20102	7.80026	0.701403	5.08816	0.39897	3.64647	0.203957	2.81231	0.104599
156.12	11.5195	1.06223	7.77183	0.620349	5.07261	0.352865	3.65437	0.180388	2.82374	0.0925112
157.12	11.4488	0.939481	7.72931	0.548661	5.03162	0.312087	3.65302	0.159542	2.78363	0.0818206
158.12	11.3425	0.830913	7.68274	0.485257	4.99329	0.276022	3.64349	0.141105	2.75293	0.0723653
159.12	11.2265	0.734892	7.64091	0.42918	4.97098	0.244125	3.5984	0.124799	2.74543	0.0640027
160.12	11.114	0.649968	7.59971	0.379584	4.93333	0.215914	3.57039	0.110377	2.75559	0.0566065
161.12	11.0523	0.574857	7.53348	0.335719	4.91123	0.190963	3.54536	0.0976218	2.73231	0.050065
162.12	10.9901	0.508426	7.50012	0.296923	4.86615	0.168895	3.52277	0.0863406	2.71036	0.0442795
163.12	10.8933	0.449672	7.4553	0.26261	4.84598	0.149377	3.49177	0.076363	2.70344	0.0391625
164.12	10.8249	0.397707	7.40693	0.232263	4.82405	0.132115	3.45944	0.0675384	2.71974	0.0346369
165.12	10.7493	0.351748	7.35021	0.205422	4.8261	0.116848	3.45072	0.0597336	2.7209	0.0306342
166.12	10.6971	0.3111	7.30134	0.181684	4.84749	0.103345	3.43948	0.0528308	2.6988	0.0270941
167.12	10.6218	0.275149	7.23233	0.160688	4.82418	0.0914021	3.43444	0.0467256	2.65301	0.0239631
168.12	10.5258	0.243352	7.20914	0.142119	4.79105	0.0808396	3.44075	0.041326	2.6384	0.0211939
169.12	10.4703	0.21523	7.17142	0.125696	4.76987	0.0714977	3.43293	0.0365503	2.61231	0.0187447
170.12	10.4308	0.190358	7.12937	0.11117	4.75675	0.0632354	3.43361	0.0323265	2.60532	0.0165785
171.12	10.421	0.16836	7.09978	0.0983231	4.76696	0.0559279	3.41868	0.0285908	2.58754	0.0146627
172.12	10.3555	0.148904	7.04045	0.0869608	4.75841	0.0494648	3.38859	0.0252869	2.58602	0.0129683
173.12	10.2787	0.131697	6.97037	0.0769116	4.71726	0.0437486	3.36726	0.0223647	2.58292	0.0114697
174.12	10.218	0.116478	6.92509	0.0680236	4.70328	0.038693	3.35554	0.0197802	2.5925	0.0101442
175.12	10.1726	0.103018	6.89885	0.0601628	4.67192	0.0342216	3.34019	0.0174944	2.57665	0.00897194
176.12	10.1301	0.0911129	6.87444	0.0532103	4.66387	0.0302669	3.33384	0.0154727	2.5782	0.00793514
177.12	10.0925	0.0805838	6.83976	0.0470613	4.64249	0.0267692	3.32509	0.0136847	2.54389	0.00701815
178.12	10.0468	0.0712715	6.81189	0.0416228	4.61462	0.0236758	3.30689	0.0121033	2.48489	0.00620712
179.12	9.98279	0.0630353	6.79589	0.0368129	4.59044	0.0209398	3.29789	0.0107046	2.43947	0.00548982
180.12	9.92102	0.0557509	6.77493	0.0325587	4.58077	0.01852	3.29814	0.00946758	2.41747	0.00485542
181.12	9.87213	0.0493083	6.76024	0.0287962	4.58251	0.0163798	3.28641	0.0083735	2.40404	0.00429432
182.12	9.8277	0.0436102	6.73615	0.0254685	4.54547	0.0144869	3.27832	0.00740585	2.40683	0.00379806
183.12	9.77533	0.0385705	6.70007	0.0225254	4.53094	0.0128128	3.26532	0.00655002	2.41501	0.00335916
184.12	9.75928	0.0341133	6.67959	0.0199223	4.53982	0.0113321	3.25682	0.0057931	2.40514	0.00297097
185.12	9.72467	0.0301711	6.65237	0.0176201	4.54055	0.0100226	3.24858	0.00512364	2.41503	0.00262764
186.12	9.67609	0.0266845	6.62974	0.0155839	4.53837	0.00886437	3.22694	0.00453155	2.39359	0.00232399
187.12	9.62537	0.0236008	6.574	0.013783	4.53024	0.00784	3.2022	0.00400788	2.37698	0.00205543
188.12	9.55499	0.0208735	6.53672	0.0121902	4.51761	0.006934	3.19575	0.00354473	2.38511	0.0018179
189.12	9.51245	0.0184614	6.49879	0.0107815	4.50581	0.0061327	3.20522	0.0031351	2.37495	0.00160782
190.12	9.46979	0.0163279	6.46443	0.00953559	4.51216	0.005424	3.19723	0.0027728	2.34349	0.00142202
191.12	9.42078	0.0144411	6.42356	0.00843365	4.49265	0.0047972	3.19752	0.00245237	2.34397	0.00125769
192.12	9.38867	0.0127723	6.39371	0.00745905	4.49381	0.00424283	3.16633	0.00216898	2.29127	0.00111235
193.12	9.341	0.0112963	6.34775	0.00659708	4.47422	0.00375253	3.13551	0.00191833	2.26847	0.000983808
194.12	9.30023	0.00999088	6.33481	0.00583471	4.45914	0.00331888	3.11732	0.00169664	2.2642	0.000870118
195.12	9.2688	0.00883632	6.31464	0.00516045	4.44617	0.00293535	3.11212	0.00150058	2.27554	0.000769567
196.12	9.23981	0.00781519	6.28735	0.0045641	4.44604	0.00259614	3.12512	0.00132717	2.27393	0.000680635
197.12	9.19751	0.00691206	6.27795	0.00403667	4.43842	0.00229613	3.13428	0.0011738	2.27432	0.00060198
198.12	9.18713	0.0061133	6.27749	0.00357019	4.41976	0.00203079	3.12358	0.00103816	2.251	0.000532415
199.12	9.13348	0.00540684	6.24098	0.00315762	4.38191	0.00179611	3.1224	0.000918186	2.21864	0.000470889
200.12	9.0824	0.00478202	6.21709	0.00279272	4.34295	0.00158855	3.0947	0.00081208	2.20885	0.000416472
201.12	9.04376	0.00422941	6.19308	0.00246999	4.28829	0.00140497	3.06908	0.000718235	2.19372	0.000368345
202.12	8.99127	0.00374065	6.16394	0.00218456	4.27374	0.00124261	3.04547	0.000635235	2.18561	0.000325778
203.12	8.97626	0.00330838	6.14019	0.00193211	4.27117	0.00109902	3.0189	0.000561827	2.14745	0.000288131
204.12	8.95074	0.00292606	6.12639	0.00170883	4.27721	0.000972013	3.00626	0.000496902	2.1346	0.000254834
205.12	8.93744	0.00258792	6.09883	0.00151136	4.2953	0.000859686	2.98532	0.00043948	2.11952	0.000225386
206.12	8.91443	0.00228886	6.06678	0.0013367	4.28792	0.00076034	2.97054	0.000388693	2.1157	0.00019934
207.12	8.89008	0.00202436	6.0574	0.00118223	4.27816	0.000672475	2.96941	0.000343775	2.1184	0.000176304
208.12	8.87341	0.00179042	6.05249	0.00104561	4.25751	0.000594763	2.95197	0.000304048	2.09995	0.00015593
209.12	8.84412	0.00158352	6.03428	0.000924782	4.22568	0.000526032	2.94905	0.000268912	2.08063	0.000137911
210.12	8.80347	0.00140053	6.01722	0.000817914	4.19221	0.000465243	2.9316	0.000237837	2.04869	0.000121974
211.12	8.7428	0.00123868	5.99114	0.000723395	4.17314	0.000411479	2.93229	0.000210352	2.02791	0.000107878
212.12	8.71362	0.00109554	5.96946	0.000639799	4.17063	0.000363928	2.92616	0.000186044	2.02491	9.54118e-05
213.12	8.71051	0.000968937	5.96467	0.000565863	4.1678	0.000321873	2.90658	0.000164544	2.0312	8.4386e-05
214.12	8.68738	0.000856966	5.9771	0.000500472	4.17839	0.000284677	2.91196	0.000145529	2.03987	7.46342e-05
215.12	8.67926	0.000757934	5.97143	0.000442637	4.19256	0.000251779	2.92987	0.000128712	2.05957	6.60095e-05
216.12	8.66754	0.000670347	5.98881	0.000391485	4.20987	0.000222683	2.93837	0.000113838	2.07102	5.83814e-05
217.12	8.65631	0.000592881	5.98635	0.000346245	4.21761	0.00019695	2.94249	0.000100683	2.06304	5.16348e-05
218.12	8.63	0.000524367	5.98696	0.000306233	4.19821	0.00017419	2.92882	8.90477e-05	2.0469	4.56678e-05
219.12	8.59253	0.000463771	5.94338	0.000270844	4.17391	0.000154061	2.90984	7.87573e-05	2.01827	4.03904e-05
220.12	8.56165	0.000410177	5.92317	0.000239545	4.15553	0.000136257	2.88082	6.9656e-05	1.986	3.57229e-05
221.12	8.54047	0.000362777	5.89529	0.000211863	4.12734	0.000120511	2.86199	6.16065e-05	1.96746	3.15947e-05
222.12	8.51245	0.000320854	5.85542	0.00018738	4.09926	0.000106585	2.8464	5.44872e-05	1.95573	2.79436e-05
223.12	8.47845	0.000283776	5.84448	0.000165726	4.09021	9.42679e-05	2.85095	4.81906e-05	1.96832	2.47144e-05
224.12	8.4765	0.000250982	5.86666	0.000146575	4.1072	8.33742e-05	2.87603	4.26217e-05	1.99136	2.18584e-05
225.12	8.46832	0.000221979	5.86005	0.000129637	4.11011	7.37394e-05	2.87518	3.76963e-05	1.98401	1.93324e-05
226.12	8.42743	0.000196327	5.84412	0.000114656	4.10425	6.52181e-05	2.86658	3.33401e-05	1.97327	1.70983e-05
227.12	8.42615	0.000173639	5.83698	0.000101406	4.08728	5.76814e-05	2.84241	2.94873e-05	1.94534	1.51224e-05
228.12	8.38824	0.000153573	5.80369	8.96874e-05	4.06705	5.10157e-05	2.82496	2.60797e-05	1.94074	1.33749e-05
229.12	8.35077	0.000135826	5.77542	7.9323e-05	4.04885	4.51203e-05	2.80144	2.30659e-05	1.91906	1.18293e-05
230.12	8.32458	0.00012013	5.75519	7.01564e-05	4.01886	3.99061e-05	2.77899	2.04004e-05	1.90652	1.04623e-05
231.12	8.29364	0.000106248	5.74385	6.20491e-05	4.00752	3.52946e-05	2.7922	1.80429e-05	1.89482	9.25324e-06
232.12	8.25421	9.39696e-05	5.73275	5.48786e-05	4.01437	3.12159e-05	2.82054	1.59579e-05	1.91235	8.18393e-06
233.12	8.25116	8.31104e-05	5.74026	4.85368e-05	4.00552	2.76086e-05	2.80925	1.41138e-05	1.91833	7.23819e-06
234.12	8.21362	7.35061e-05	5.71274	4.29279e-05	4.00419	2.44181e-05	2.80348	1.24828e-05	1.92335	6.40174e-06
235.12	8.21869	6.50117e-05	5.69134	3.79671e-05	4.0105	2.15963e-05	2.8158	1.10402e-05	1.93286	5.66195e-06
236.12	8.21521	5.74989e-05	5.67839	3.35796e-05	4.00225	1.91006e-05	2.80588	9.76442e-06	1.92904	5.00765e-06
237.12	8.18396	5.08543e-05	5.64418	2.96991e-05	3.95814	1.68933e-05	2.77365	8.63604e-06	1.90788	4.42896e-06
238.12	8.16791	4.49775e-05	5.62567	2.62671e-05	3.94604	1.49411e-05	2.76068	7.63805e-06	1.90485	3.91715e-06
239.12	8.16949	3.97799e-05	5.63291	2.32316e-05	3.947	1.32145e-05	2.75123	6.75539e-06	1.91477	3.46448e-06
240.12	8.16791	3.51829e-05	5.63745	2.05469e-05	3.95972	1.16874e-05	2.73596	5.97473e-06	1.90533	3.06412e-06
241.12	8.16125	3.11171e-05	5.62128	1.81725e-05	3.97327	1.03368e-05	2.71161	5.28429e-06	1.90518	2.71003e-06
	8.15118	2.75212e-05

## Sheet: biotin-C3b ISG65L2N188A etc.
Cycle: 17 ISG65L2ala 5000 nM_X	Cycle: 18 ISG65L2ala 5000 nM_Y	Fitted Cycle: 18 ISG65L2ala 50_Y	Cycle: 19 ISG65L2ala 2500 nM_Y	Fitted Cycle: 19 ISG65L2ala 25_Y	Cycle: 20 ISG65L2ala 1250 nM_Y	Fitted Cycle: 20 ISG65L2ala 12_Y	Cycle: 21 ISG65L2ala 625 nM_Y	Fitted Cycle: 21 ISG65L2ala 62_Y	Cycle: 22 ISG65L2ala 312.5 nM_Y	Fitted Cycle: 22 ISG65L2ala 31_Y
-60.46	-0.27288	0	-0.439324	0	-0.223808	0	0.0788649	0	0.283599	0
-59.46	-0.265459	0	-0.414714	0	-0.220293	0	0.083162	0	0.280866	0
-58.46	-0.27249	0	-0.420964	0	-0.243925	0	0.0853102	0	0.243365	0
-57.46	-0.265068	0	-0.419794	0	-0.242362	0	0.0876536	0	0.246489	0
-56.46	-0.243584	0	-0.38073	0	-0.214043	0	0.0964431	0	0.254303	0
-55.46	-0.256865	0	-0.389714	0	-0.228301	0	0.0814042	0	0.255085	0
-54.46	-0.267021	0	-0.402215	0	-0.258964	0	0.0847241	0	0.252349	0
-53.46	-0.261552	0	-0.381511	0	-0.234941	0	0.0958571	0	0.273053	0
-52.46	-0.284209	0	-0.370183	0	-0.224394	0	0.106795	0	0.272662	0
-51.46	-0.290849	0	-0.377605	0	-0.237871	0	0.10074	0	0.275005	0
-50.46	-0.297881	0	-0.395573	0	-0.240996	0	0.113631	0	0.268756	0
-49.46	-0.308037	0	-0.410026	0	-0.257012	0	0.061287	0	0.256256	0
-48.46	-0.331474	0	-0.429558	0	-0.284355	0	0.0476149	0	0.244537	0
-47.46	-0.313896	0	-0.441277	0	-0.284355	0	0.0378493	0	0.232818	0
-46.46	-0.304131	0	-0.435417	0	-0.281425	0	-0.00609589	0	0.219147	0
-45.46	-0.311943	0	-0.439324	0	-0.287285	0	-0.0314867	0	0.217193	0
-44.46	-0.284209	0	-0.440496	0	-0.284941	0	-0.012346	0	0.223834	0
-43.46	-0.283037	0	-0.442058	0	-0.283769	0	-0.0115647	0	0.224225	0
-42.46	-0.290068	0	-0.434637	0	-0.281034	0	-0.00844002	0	0.239458	0
-41.46	-0.284599	0	-0.464714	0	-0.269707	0	0.023201	0	0.238678	0
-40.46	-0.290458	0	-0.447137	0	-0.257988	0	0.0212476	0	0.236724	0
-39.46	-0.306084	0	-0.456902	0	-0.252129	0	0.023201	0	0.258209	0
-38.46	-0.323662	0	-0.421746	0	-0.284355	0	-0.0129319	0	0.262115	0
-37.46	0.283759	0	-0.27933	0	-0.136308	0	-0.0434021	0	0.315236	0
-36.46	2.84046	0	2.42635	0	2.01087	0	0.601537	0	0.663175	0
-35.46	-0.0392014	0	-0.237079	0	-0.509821	0	1.02659	0	0.848973	0
-34.46	-0.305588	0	-0.383315	0	-0.0384641	0	-0.499996	0	-0.428519	0
-33.46	-0.054028	0	-0.134257	0	-0.263428	0	0.360672	0	0.341169	0
-32.46	0.206144	0	0.110321	0	0.327203	0	-0.178949	0	-0.209564	0
-31.46	0.664487	0	0.506685	0	0.351216	0	0.49837	0	0.324144	0
-30.46	0.260995	0	0.119595	0	0.100144	0	0.221709	0	0.122678	0
-29.46	0.136088	0	0.240098	0	0.272665	0	0.148721	0	0.0721599	0
-28.46	0.113374	0	0.199896	0	0.16084	0	0.105235	0	0.0701653	0
-27.46	0.106109	0	0.128879	0	0.134551	0	0.0892574	0	0.0909457	0
-26.46	0.0836813	0	0.0885634	0	0.169085	0	0.042692	0	0.0896163	0
-25.46	0.0920433	0	0.098565	0	0.157915	0	0.0281655	0	0.0879754	0
-24.46	0.090548	0	0.114861	0	0.149542	0	0.0360732	0	0.11615	0
-23.46	0.0965626	0	0.105568	0	0.13368	0	0.0300549	0	0.117943	0
-22.46	0.0576999	0	0.0763661	0	0.13634	0	0.00746653	0	0.0738942	0
-21.46	0.0621992	0	0.0543462	0	0.115956	0	0.0323061	0	0.0272695	0
-20.46	0.0408869	0	0.046254	0	0.0480051	0	0.025649	0	0.0407456	0
-19.46	0.0194961	0	0.0280061	0	0.0170814	0	0.005082	0	0.0306917	0
-18.46	0.00610679	0	0.0210702	0	0.00908607	0	0.00409752	0	0.028753	0
-17.46	-0.00599054	0	-0.00866259	0	-0.0266052	0	-0.0145096	0	0.00691663	0
-16.46	-0.00983234	0	-0.0119001	0	-0.0121288	0	-0.031725	0	0.00554837	0
-15.46	0.00549342	0	-0.00397569	0	-0.00527547	0	-0.0177882	0	0.000273883	0
-14.46	0.0127275	0	0.0030697	0	-0.00991275	0	0.00950839	0	0.00560266	0
-13.46	0.0162585	0	-0.00174779	0	-0.012203	0	0.0223425	0	-0.00725621	0
-12.46	0.0331483	0	0.0103191	0	-0.00230547	0	0.0283827	0	-0.0148045	0
-11.46	0.0127275	0	0.00611383	0	0.00617764	0	0.0324729	0	-0.0142414	0
-10.46	0.00125897	0	0.00130427	0	0.00658429	0	0.021057	0	-0.00710332	0
-9.45996	-0.0133359	0	-0.0117121	0	0.00960573	0	0.0114667	0	0.00737666	0
-8.45996	-0.0193708	0	0.00372243	0	0.015053	0	-0.00688195	0	0.00633168	0
-7.45996	-0.0238382	0	0.0157973	0	0.0218771	0	-0.0204199	0	0.0285689	0
-6.45996	3.10317e-05	0	0.0294555	0	0.0536352	0	-0.00825552	0	0.0433944	0
-5.45996	0.0282141	0	0.054266	0	0.103264	0	0.00804837	0	0.0584392	0
-4.45996	0.0622714	0	0.113014	0	0.142479	0	0.0321805	0	0.0812523	0
-3.45996	0.114493	0	0.212453	0	0.262663	0	0.0859773	0	0.110372	0
-2.45996	0.214051	0	0.29769	0	0.358708	0	0.13869	0	0.230772	0
-1.45996	-0.81172	0	-1.0653	0	-1.59526	0	-0.673818	0	-0.629963	0
-0.459961	0.892107	0	1.52657	0	2.41751	0.590469	1.33177	0	1.42285	0
0.540039	1.52007	6.80417	1.59699	4.31943	1.92895	2.81359	1.48228	0.989079	1.5796	0.550876
1.54004	11.9098	14.2735	6.84513	8.14208	4.62117	4.69882	2.04389	2.01284	1.63313	1.05955
2.54004	19.6825	20.1488	11.2543	11.3035	6.982	6.29752	3.7543	2.89194	2.71198	1.49909
3.54004	25.0199	24.7703	14.3377	13.9181	8.55245	7.65323	4.81604	3.64683	3.33146	1.8789
4.54004	28.889	28.4054	16.6461	16.0803	9.74221	8.80288	5.46729	4.29505	3.66662	2.20709
5.54004	31.8341	31.2648	18.4706	17.8686	10.7645	9.7778	6.04655	4.85169	3.89758	2.49069
6.54004	34.0176	33.514	19.8437	19.3475	11.4538	10.6045	6.52238	5.32967	4.08866	2.73574
7.54004	35.5238	35.2831	20.8798	20.5706	11.9977	11.3056	6.78527	5.74012	4.23727	2.9475
8.54004	36.6764	36.6747	21.6735	21.5822	12.574	11.9002	6.99555	6.09257	4.24571	3.13047
9.54004	37.6247	37.7694	22.4758	22.4187	12.8968	12.4043	7.21617	6.39522	4.30807	3.28858
10.54	38.2219	38.6304	23.0093	23.1106	13.1619	12.8319	7.39859	6.65512	4.46618	3.42521
11.54	38.8267	39.3076	23.4178	23.6828	13.4694	13.1944	7.58804	6.87829	4.53391	3.54326
12.54	39.2539	39.8404	23.7952	24.156	13.7606	13.5019	7.73259	7.06993	4.65498	3.64527
13.54	39.6335	40.2594	24.1028	24.5473	13.9328	13.7626	7.94589	7.23449	4.70291	3.73342
14.54	39.8935	40.589	24.3872	24.871	14.0368	13.9837	7.97287	7.37579	4.72723	3.80959
15.54	40.0723	40.8483	24.6116	25.1386	14.154	14.1712	8.04838	7.49713	4.75285	3.8754
16.54	40.2671	41.0522	24.7163	25.36	14.3215	14.3302	8.19025	7.60133	4.83754	3.93228
17.54	40.4148	41.2127	24.9099	25.5431	14.5064	14.465	8.29678	7.6908	4.92802	3.98142
18.54	40.5802	41.3388	25.083	25.6945	14.5494	14.5794	8.33456	7.76763	5.0184	4.02388
19.54	40.6516	41.4381	25.1737	25.8197	14.6232	14.6763	8.32659	7.83361	4.95403	4.06058
20.54	40.7118	41.5162	25.2579	25.9233	14.7318	14.7585	8.37642	7.89026	4.97153	4.09228
21.54	40.9345	41.5776	25.3576	26.0089	14.8397	14.8283	8.50412	7.9389	5.10802	4.11968
22.54	41.0449	41.6259	25.5205	26.0798	14.9287	14.8874	8.55363	7.98068	5.12579	4.14336
23.54	41.0448	41.6639	25.5648	26.1383	14.9732	14.9375	8.57434	8.01655	5.07884	4.16381
24.54	41.0571	41.6938	25.616	26.1868	15.0098	14.98	8.58363	8.04735	5.08375	4.18149
25.54	41.1052	41.7173	25.6034	26.2269	15.0314	15.0161	8.63547	8.0738	5.16266	4.19677
26.54	41.1308	41.7358	25.6208	26.26	15.1036	15.0467	8.62312	8.09651	5.1465	4.20996
27.54	41.1665	41.7503	25.75	26.2874	15.1343	15.0726	8.6536	8.11602	5.15796	4.22137
28.54	41.2159	41.7617	25.7081	26.31	15.1066	15.0946	8.63412	8.13276	5.15482	4.23122
29.54	41.2343	41.7707	25.7487	26.3288	15.1531	15.1132	8.65381	8.14715	5.20592	4.23974
30.54	41.2824	41.7778	25.7549	26.3443	15.1878	15.129	8.63569	8.15949	5.26488	4.2471
31.54	41.3527	41.7834	25.8062	26.3571	15.168	15.1425	8.71978	8.1701	5.25795	4.25346
32.54	41.336	41.7878	25.8201	26.3677	15.1831	15.1538	8.72514	8.1792	5.25941	4.25895
33.54	41.355	41.7912	25.8753	26.3765	15.2384	15.1635	8.74031	8.18702	5.27158	4.2637
34.54	41.3555	41.7939	25.8851	26.3837	15.2753	15.1716	8.75504	8.19374	5.3186	4.2678
35.54	41.3528	41.796	25.9619	26.3897	15.3151	15.1786	8.77944	8.1995	5.34223	4.27135
36.54	41.3825	41.7977	25.9105	26.3947	15.2898	15.1845	8.82796	8.20445	5.36736	4.27441
37.54	41.3816	41.799	25.8678	26.3988	15.2902	15.1894	8.82582	8.20871	5.37548	4.27706
38.54	41.3746	41.8001	25.8915	26.4022	15.3226	15.1937	8.83273	8.21236	5.36954	4.27934
39.54	41.3724	41.8009	25.9081	26.405	15.3586	15.1973	8.85691	8.21549	5.40095	4.28132
40.54	41.3848	41.8015	25.9349	26.4073	15.3691	15.2003	8.89217	8.21818	5.39349	4.28303
41.54	41.3418	41.802	25.9192	26.4092	15.3461	15.2029	8.8874	8.22049	5.39605	4.2845
42.54	41.3466	41.8024	25.9185	26.4108	15.3834	15.2051	8.89107	8.22248	5.42318	4.28578
43.54	41.401	41.8027	25.918	26.4121	15.4272	15.2069	8.90736	8.22418	5.45027	4.28688
44.54	41.396	41.803	25.937	26.4132	15.4374	15.2085	8.92665	8.22565	5.48349	4.28783
45.54	41.3624	41.8032	25.9342	26.4141	15.4433	15.2098	8.94211	8.2269	5.50235	4.28865
46.54	41.3266	41.8033	25.9055	26.4148	15.4559	15.211	8.95894	8.22798	5.51759	4.28937
47.54	41.3175	41.8035	25.9225	26.4155	15.449	15.2119	9.00548	8.22891	5.52646	4.28998
48.54	41.2979	41.8035	25.9459	26.416	15.4295	15.2127	9.0278	8.22971	5.56019	4.29051
49.54	41.2759	41.8036	25.9626	26.4164	15.4296	15.2134	9.03556	8.23039	5.57662	4.29097
50.54	41.2507	41.8037	25.9877	26.4167	15.4429	15.214	9.05857	8.23098	5.59512	4.29137
51.54	41.2637	41.8037	25.9997	26.417	15.4582	15.2145	9.05423	8.23148	5.6188	4.29171
52.54	41.2719	41.8038	26.0162	26.4173	15.4699	15.2149	9.06912	8.23191	5.63512	4.292
53.54	41.2784	41.8038	26.0198	26.4174	15.4674	15.2153	9.08333	8.23228	5.65958	4.29226
54.54	41.2805	41.8038	26.0222	26.4176	15.4643	15.2156	9.09769	8.2326	5.69469	4.29248
55.54	41.2759	41.8038	26.0224	26.4177	15.4432	15.2158	9.10244	8.23288	5.71488	4.29267
56.54	41.2639	41.8038	26.0131	26.4179	15.4452	15.2161	9.10013	8.23311	5.71349	4.29284
57.54	41.2562	41.8039	26.0253	26.4179	15.4507	15.2162	9.14264	8.23331	5.71933	4.29298
58.54	41.2667	41.8039	26.0407	26.418	15.4708	15.2164	9.16501	8.23349	5.72497	4.2931
59.54	41.2617	41.8039	26.0644	26.4181	15.5051	15.2165	9.16803	8.23364	5.7452	4.29321
60.54	41.297	41.8039	26.0928	26.4181	15.5295	15.2166	9.19303	8.23377	5.77201	4.2933
61.54	41.3101	41.8039	26.1158	26.4182	15.535	15.2167	9.2017	8.23387	5.77864	4.29338
62.54	41.3178	41.8039	26.1469	26.4182	15.5607	15.2168	9.20407	8.23397	5.7788	4.29345
63.54	41.3064	41.8039	26.1831	26.4182	15.5839	15.2169	9.24737	8.23405	5.78222	4.29351
64.54	41.4707	41.8039	26.339	26.4183	15.7812	15.2169	9.34386	8.23412	5.79322	4.29356
65.54	41.8133	41.8039	26.5605	26.4183	16.0021	15.217	9.5819	8.23418	5.81707	4.2936
66.54	41.8595	41.8039	26.5949	26.4183	15.9941	15.217	9.68825	8.23423	5.85583	4.29364
67.54	41.8028	41.8039	26.5403	26.4183	15.9793	15.2171	9.62199	8.23427	5.87953	4.29368
68.54	41.6644	41.8039	26.446	26.4183	15.9068	15.2171	9.54489	8.23431	5.90083	4.2937
69.54	41.5131	41.8039	26.353	26.4183	15.8338	15.2171	9.512	8.23435	5.90114	4.29373
70.54	41.4159	41.8039	26.2825	26.4184	15.7723	15.2171	9.4672	8.23437	5.88747	4.29375
71.54	41.3122	41.8039	26.2223	26.4184	15.7133	15.2172	9.39342	8.2344	5.86824	4.29377
72.54	41.2436	41.8039	26.129	26.4184	15.6652	15.2172	9.34821	8.23442	5.88974	4.29378
73.54	41.1731	41.8039	26.0566	26.4184	15.5983	15.2172	9.32651	8.23444	5.91035	4.2938
74.54	41.0956	41.8039	26.0098	26.4184	15.5454	15.2172	9.32111	8.23445	5.95177	4.29381
75.54	41.0624	41.8039	25.9679	26.4184	15.5224	15.2172	9.33584	8.23446	5.98847	4.29382
76.54	41.0428	41.8039	25.9319	26.4184	15.5431	15.2172	9.33158	8.23447	5.99818	4.29383
77.54	41.0328	41.8039	25.9444	26.4184	15.554	15.2172	9.29283	8.23448	6.01223	4.29384
78.54	41.0645	41.8039	25.962	26.4184	15.5875	15.2172	9.3083	8.23449	6.02334	4.29384
79.54	41.0998	41.8039	25.9542	26.4184	15.5792	15.2172	9.3032	8.2345	6.04352	4.29385
80.54	41.0881	41.8039	25.8971	26.4184	15.5335	15.2172	9.28531	8.23451	6.05172	4.29385
81.54	41.0867	41.8039	25.8202	26.4184	15.5074	15.2172	9.30193	8.23451	6.05162	4.29386
82.54	41.1005	41.8039	25.7907	26.4184	15.5235	15.2172	9.34138	8.23452	6.05972	4.29386
83.54	41.112	41.8039	25.8043	26.4184	15.5487	15.2173	9.33425	8.23452	6.07149	4.29387
84.54	41.1305	41.8039	25.805	26.4184	15.5726	15.2173	9.33496	8.23452	6.1036	4.29387
85.54	41.1589	41.8039	25.8161	26.4184	15.5797	15.2173	9.34883	8.23453	6.12891	4.29387
86.54	41.1588	41.8039	25.8518	26.4184	15.5712	15.2173	9.36478	8.23453	6.142	4.29387
87.54	41.1127	41.8039	25.8563	26.4184	15.563	15.2173	9.31418	8.23453	6.10923	4.29387
88.54	41.0331	41.8039	25.8039	26.4184	15.5324	15.2173	9.27265	8.23453	6.0843	4.29388
89.54	40.9602	41.8039	25.7153	26.4184	15.4746	15.2173	9.23587	8.23453	6.07935	4.29388
90.54	40.868	41.8039	25.6269	26.4184	15.4329	15.2173	9.2076	8.23453	6.06269	4.29388
91.54	40.8265	41.8039	25.5995	26.4184	15.4167	15.2173	9.20748	8.23454	6.05964	4.29388
92.54	40.8313	41.8039	25.5994	26.4184	15.4087	15.2173	9.26796	8.23454	6.09266	4.29388
93.54	40.8305	41.8039	25.5937	26.4184	15.405	15.2173	9.31605	8.23454	6.10142	4.29388
94.54	40.8024	41.8039	25.5496	26.4184	15.4022	15.2173	9.33138	8.23454	6.11451	4.29388
95.54	40.7971	41.8039	25.493	26.4184	15.3927	15.2173	9.31615	8.23454	6.11706	4.29388
96.54	40.8073	41.8039	25.4631	26.4184	15.3944	15.2173	9.28208	8.23454	6.12435	4.29388
97.54	40.8127	41.8039	25.452	26.4184	15.3691	15.2173	9.2551	8.23454	6.10348	4.29388
98.54	40.7709	41.8039	25.4508	26.4184	15.3572	15.2173	9.25103	8.23454	6.0499	4.29388
99.54	40.7384	41.8039	25.4721	26.4184	15.3742	15.2173	9.25197	8.23454	6.0416	4.29388
100.54	40.7385	41.8039	25.5131	26.4184	15.3754	15.2173	9.26009	8.23454	6.06692	4.29388
101.54	40.7222	41.8039	25.4493	26.4184	15.2823	15.2173	9.26936	8.23454	6.03206	4.29388
102.54	40.7561	41.8039	25.3784	26.4184	15.3028	15.2173	9.25467	8.23454	6.05769	4.29388
103.54	40.8144	41.8039	25.4918	26.4184	15.3323	15.2173	9.28161	8.23454	6.14676	4.29388
104.54	40.8385	41.8039	25.511	26.4184	15.3044	15.2173	9.29353	8.23454	6.15427	4.29388
105.54	40.7864	41.8039	25.5095	26.4184	15.2955	15.2173	9.28964	8.23454	6.14458	4.29388
106.54	40.7236	41.8039	25.4785	26.4184	15.2726	15.2173	9.2449	8.23454	6.0956	4.29388
107.54	40.6947	41.8039	25.4314	26.4184	15.2506	15.2173	9.23903	8.23454	6.04701	4.29388
108.54	40.6251	41.8039	25.4124	26.4184	15.2233	15.2173	9.25862	8.23454	6.07215	4.29388
109.54	40.5492	41.8039	25.3826	26.4184	15.1856	15.2173	9.26203	8.23454	6.09462	4.29388
110.54	40.5477	41.8039	25.3801	26.4184	15.1443	15.2173	9.22828	8.23454	6.09376	4.29389
111.54	40.5237	41.8039	25.3285	26.4184	15.1437	15.2173	9.15383	8.23454	6.06673	4.29389
112.54	40.5166	41.8039	25.3025	26.4184	15.1726	15.2173	9.13616	8.23454	6.05715	4.29389
113.54	40.5101	41.8039	25.3026	26.4184	15.1665	15.2173	9.17601	8.23454	6.06493	4.29389
114.54	40.4682	41.8039	25.3014	26.4184	15.1393	15.2173	9.18213	8.23454	6.01457	4.29389
115.54	40.4352	41.8039	25.3104	26.4184	15.1264	15.2173	9.18043	8.23454	5.97165	4.29389
116.54	40.4222	41.8039	25.3126	26.4184	15.1481	15.2173	9.14905	8.23454	5.99503	4.29389
117.54	40.4758	41.8039	25.3567	26.4184	15.1767	15.2173	9.12835	8.23454	6.0308	4.29389
118.54	40.5619	41.8039	25.4139	26.4184	15.0276	15.2173	9.20779	8.23454	6.07974	4.29389
119.54	40.172	41.8039	25.1145	26.4184	15.0932	14.9222	7.92733	8.23454	5.77996	4.29389
120.54	39.1589	37.6951	23.3148	23.1651	13.3424	12.9754	9.29943	7.42522	5.48573	3.81813
121.54	31.345	32.7771	19.129	20.1428	11.2474	11.2825	7.21528	6.45647	4.86996	3.31998
122.54	26.3924	28.5008	16.2145	17.5148	9.54115	9.81048	6.2	5.6141	4.2658	2.88683
123.54	22.4418	24.7823	13.7919	15.2297	8.22469	8.53053	5.42435	4.88164	3.81608	2.51019
124.54	19.0965	21.549	11.8422	13.2427	7.22554	7.41757	4.80749	4.24475	3.44903	2.18269
125.54	16.5088	18.7376	10.3123	11.515	6.43437	6.44982	4.31358	3.69094	3.19059	1.89792
126.54	14.2826	16.2929	9.04759	10.0126	5.73605	5.60832	3.89377	3.20939	2.93075	1.6503
127.54	12.4686	14.1672	7.98911	8.70631	5.09302	4.87662	3.56111	2.79067	2.7514	1.43498
128.54	11.011	12.3188	7.07802	7.57042	4.63178	4.24038	3.27047	2.42658	2.55134	1.24776
129.54	9.69137	10.7116	6.31379	6.58272	4.17747	3.68714	2.98087	2.10999	2.47851	1.08496
130.54	8.67338	9.31411	5.68767	5.72389	3.8684	3.20609	2.81588	1.8347	2.36997	0.94341
131.54	7.7668	8.09892	5.20419	4.9771	3.57544	2.7878	2.62204	1.59533	2.23298	0.820323
132.54	7.01463	7.04227	4.67915	4.32775	3.25292	2.42408	2.4344	1.38718	2.1509	0.713295
133.54	6.25634	6.12348	4.2585	3.76312	3.03151	2.10782	2.28715	1.2062	2.05173	0.620232
134.54	5.7058	5.32456	3.92868	3.27215	2.83128	1.83281	2.19831	1.04882	1.93637	0.53931
135.54	5.2822	4.62988	3.64263	2.84524	2.74759	1.59368	2.08777	0.911985	1.88079	0.468946
136.54	4.89102	4.02583	3.37607	2.47403	2.57974	1.38575	1.99468	0.792998	1.86704	0.407763
137.54	4.56792	3.50059	3.17344	2.15125	2.40769	1.20495	1.90971	0.689535	1.7991	0.354562
138.54	4.24651	3.04387	3.00907	1.87058	2.31113	1.04774	1.84119	0.599572	1.80926	0.308302
139.54	3.96545	2.64675	2.82351	1.62652	2.17296	0.911045	1.78593	0.521346	1.77221	0.268078
140.54	3.65504	2.30143	2.60918	1.41431	2.04227	0.792181	1.65324	0.453326	1.64929	0.233102
141.54	3.40595	2.00117	2.48842	1.22978	1.95561	0.688825	1.58961	0.39418	1.57931	0.202689
142.54	3.25424	1.74008	2.39922	1.06933	1.89476	0.598954	1.59982	0.342752	1.58981	0.176244
143.54	3.11155	1.51305	2.28299	0.929818	1.83101	0.520809	1.54779	0.298033	1.56521	0.15325
144.54	2.99923	1.31564	2.20771	0.808505	1.7858	0.452859	1.49957	0.259148	1.54985	0.133255
145.54	2.85612	1.14399	2.14985	0.703019	1.7569	0.393774	1.4762	0.225337	1.50707	0.115869
146.54	2.70594	0.994733	2.09333	0.611296	1.69545	0.342399	1.44632	0.195938	1.45219	0.100752
147.54	2.56454	0.86495	2.01107	0.531541	1.70099	0.297726	1.42203	0.170374	1.44024	0.0876068
148.54	2.48346	0.7521	1.94595	0.46219	1.67468	0.258882	1.4217	0.148145	1.45683	0.0761768
149.54	2.38007	0.653974	1.86932	0.401888	1.57266	0.225105	1.39287	0.128817	1.44068	0.066238
150.54	2.27939	0.56865	1.78716	0.349454	1.50014	0.195736	1.34656	0.11201	1.38157	0.0575959
151.54	2.21923	0.494458	1.70614	0.303861	1.49225	0.170198	1.30328	0.0973959	1.38064	0.0500814
152.54	2.16089	0.429946	1.67649	0.264216	1.50488	0.147992	1.28893	0.0846887	1.38965	0.0435473
153.54	2.12852	0.373851	1.65435	0.229744	1.47197	0.128684	1.28645	0.0736393	1.38704	0.0378657
154.54	2.06384	0.325075	1.5895	0.199769	1.40314	0.111894	1.24644	0.0640316	1.33555	0.0329253
155.54	1.97093	0.282662	1.52307	0.173705	1.36945	0.0972956	1.19216	0.0556774	1.2956	0.0286296
156.54	1.90822	0.245783	1.4818	0.151042	1.37816	0.0846014	1.18072	0.0484132	1.30128	0.0248943
157.54	1.8619	0.213716	1.48196	0.131336	1.40035	0.0735635	1.1794	0.0420967	1.29348	0.0216463
158.54	1.83562	0.185832	1.45932	0.1142	1.37508	0.0639657	1.18857	0.0366043	1.32138	0.0188221
159.54	1.8236	0.161587	1.43763	0.0993005	1.34865	0.0556201	1.19039	0.0318286	1.34258	0.0163664
160.54	1.79141	0.140505	1.39349	0.0863447	1.29099	0.0483633	1.16859	0.0276759	1.33712	0.0142311
161.54	1.74518	0.122173	1.33915	0.0750793	1.24898	0.0420533	1.14506	0.024065	1.33191	0.0123743
162.54	1.70532	0.106233	1.31591	0.0652837	1.24717	0.0365666	1.13875	0.0209253	1.31001	0.0107599
163.54	1.67595	0.0923728	1.3306	0.0567662	1.24143	0.0317958	1.15778	0.0181951	1.29727	0.00935602
164.54	1.6575	0.0803209	1.34885	0.0493599	1.22516	0.0276474	1.12177	0.0158212	1.25021	0.00813534
165.54	1.61565	0.0698415	1.30172	0.0429199	1.22015	0.0240402	1.11842	0.013757	1.22425	0.00707392
166.54	1.56288	0.0607293	1.23877	0.0373201	1.20293	0.0209037	1.08954	0.0119622	1.21177	0.00615099
167.54	1.50166	0.0528059	1.20555	0.032451	1.17238	0.0181764	1.04658	0.0104014	1.20816	0.00534847
168.54	1.42876	0.0459163	1.22372	0.0282171	1.14366	0.0158049	1.00946	0.00904437	1.20212	0.00465065
169.54	1.41618	0.0399256	1.24075	0.0245356	1.15139	0.0137429	1.00828	0.00786435	1.21095	0.00404388
170.54	1.44196	0.0347165	1.22974	0.0213345	1.13615	0.0119498	1.01891	0.00683829	1.22259	0.00351628
171.54	1.46477	0.0301871	1.2149	0.018551	1.10947	0.0103907	1.02481	0.0059461	1.20305	0.00305751
172.54	1.44743	0.0262486	1.19333	0.0161306	1.09091	0.00903506	1.04586	0.00517031	1.18141	0.0026586
173.54	1.42774	0.0228239	1.18451	0.014026	1.10182	0.00785625	1.03675	0.00449574	1.16727	0.00231173
174.54	1.41508	0.0198461	1.17021	0.0121961	1.10576	0.00683125	1.03132	0.00390918	1.13719	0.00201012
175.54	1.394	0.0172568	1.14375	0.0106048	1.09566	0.00593998	1.014	0.00339915	1.10699	0.00174786
176.54	1.37296	0.0150053	1.1351	0.00922123	1.06645	0.00516499	1.00345	0.00295566	1.10169	0.00151981
177.54	1.3462	0.0130475	1.11844	0.00801814	1.05331	0.00449111	0.987602	0.00257004	1.11761	0.00132152
178.54	1.32156	0.0113452	1.12182	0.00697201	1.04598	0.00390516	0.973454	0.00223473	1.10958	0.00114911
179.54	1.31581	0.00986501	1.11883	0.00606237	1.02402	0.00339565	0.962602	0.00194316	1.11637	0.000999182
180.54	1.32829	0.00857792	1.12208	0.00527142	1.02354	0.00295262	0.956603	0.00168964	1.1004	0.000868818
181.54	1.34179	0.00745876	1.11994	0.00458366	0.997383	0.00256739	0.963921	0.00146919	1.09607	0.000755464
182.54	1.31362	0.00648561	1.10219	0.00398563	0.99066	0.00223242	0.942445	0.0012775	1.09183	0.000656898
183.54	1.25789	0.00563944	1.0683	0.00346562	0.949881	0.00194116	0.93712	0.00111083	1.08232	0.000571193
184.54	1.20065	0.00490366	1.04219	0.00301346	0.943317	0.0016879	0.912518	0.000965899	1.07761	0.000496669
185.54	1.1879	0.00426388	1.02326	0.0026203	0.937166	0.00146768	0.910857	0.000839878	1.06845	0.000431869
186.54	1.20312	0.00370757	1.024	0.00227843	0.95731	0.00127619	0.926655	0.000730299	1.06607	0.000375523
187.54	1.22026	0.00322384	1.03673	0.00198116	0.94742	0.00110968	0.911856	0.000635017	1.06051	0.000326528
188.54	1.1964	0.00280323	1.0133	0.00172268	0.937624	0.000964904	0.902121	0.000552166	1.07177	0.000283926
189.54	1.18104	0.00243749	1.00735	0.00149792	0.917061	0.000839013	0.889946	0.000480125	1.04425	0.000246882
190.54	1.15836	0.00211947	0.993875	0.00130249	0.900405	0.000729547	0.881989	0.000417483	1.01094	0.000214672
191.54	1.13266	0.00184294	0.981533	0.00113255	0.891893	0.000634363	0.87097	0.000363014	0.980632	0.000186663
192.54	1.11681	0.0016025	0.967398	0.000984787	0.873301	0.000551598	0.866522	0.000315652	0.960165	0.000162309
193.54	1.06743	0.00139342	0.935753	0.000856302	0.857517	0.000479631	0.840115	0.000274469	0.949769	0.000141133
194.54	1.07571	0.00121162	0.927394	0.00074458	0.862089	0.000417053	0.828043	0.000238659	0.967899	0.000122719
195.54	1.08415	0.00105354	0.903649	0.000647435	0.85424	0.00036264	0.811287	0.000207521	0.966805	0.000106708
196.54	1.0815	0.000916084	0.891693	0.000562964	0.873142	0.000315327	0.808475	0.000180446	0.964225	9.27859e-05
197.54	1.08681	0.000796562	0.88591	0.000489514	0.87006	0.000274186	0.824451	0.000156903	0.953369	8.06802e-05
198.54	1.07009	0.000692635	0.89833	0.000425647	0.874706	0.000238413	0.84129	0.000136432	0.954772	7.01538e-05
199.54	1.06893	0.000602267	0.911094	0.000370113	0.900658	0.000207307	0.849708	0.000118632	0.965659	6.10009e-05
200.54	1.0882	0.000523689	0.921737	0.000321824	0.930782	0.00018026	0.88802	0.000103154	0.976379	5.30421e-05
201.54	1.08016	0.000455363	0.929428	0.000279836	0.947678	0.000156741	0.883942	8.96952e-05	0.999221	4.61217e-05
202.54	1.08314	0.000395952	0.941071	0.000243326	0.928814	0.000136291	0.87656	7.79927e-05	0.992508	4.01042e-05
203.54	1.05884	0.000344292	0.92537	0.000211579	0.899002	0.000118509	0.85598	6.7817e-05	0.980324	3.48718e-05
204.54	1.02432	0.000299372	0.93438	0.000183974	0.901287	0.000103047	0.847134	5.89689e-05	0.981133	3.03221e-05
205.54	1.0089	0.000260313	0.945801	0.000159971	0.891022	8.96029e-05	0.865677	5.12752e-05	1.00232	2.63659e-05
206.54	0.999382	0.00022635	0.952942	0.0001391	0.889278	7.79124e-05	0.862888	4.45854e-05	1.01766	2.2926e-05
207.54	0.984473	0.000196818	0.942967	0.000120951	0.882998	6.77471e-05	0.858457	3.87683e-05	1.0241	1.99348e-05
208.54	0.992807	0.000171139	0.921733	0.000105171	0.872114	5.89082e-05	0.85052	3.37102e-05	1.01575	1.73339e-05
209.54	0.970785	0.000148811	0.905828	9.14492e-05	0.85795	5.12224e-05	0.81851	2.9312e-05	0.98657	1.50724e-05
210.54	0.922684	0.000129396	0.871804	7.95178e-05	0.843746	4.45394e-05	0.775761	2.54877e-05	0.957695	1.31059e-05
211.54	0.899521	0.000112513	0.865959	6.91432e-05	0.84985	3.87284e-05	0.766148	2.21623e-05	0.940758	1.1396e-05
212.54	0.885559	9.78337e-05	0.856148	6.0122e-05	0.852093	3.36755e-05	0.763828	1.92708e-05	0.950241	9.90913e-06
213.54	0.874794	8.50693e-05	0.834923	5.22779e-05	0.837494	2.92818e-05	0.763657	1.67565e-05	0.948784	8.61628e-06
214.54	0.866791	7.39703e-05	0.836349	4.54572e-05	0.821014	2.54614e-05	0.772316	1.45703e-05	0.933563	7.49212e-06
215.54	0.859398	6.43194e-05	0.832421	3.95264e-05	0.796085	2.21395e-05	0.771076	1.26693e-05	0.925194	6.51462e-06
216.54	0.843979	5.59277e-05	0.833687	3.43694e-05	0.775742	1.9251e-05	0.770325	1.10164e-05	0.919579	5.66466e-06
217.54	0.829538	4.86308e-05	0.839892	2.98852e-05	0.777128	1.67393e-05	0.757227	9.57905e-06	0.888522	4.92559e-06
218.54	0.844556	4.22859e-05	0.818521	2.59861e-05	0.772103	1.45553e-05	0.773887	8.32927e-06	0.891443	4.28295e-06
219.54	0.84749	3.67689e-05	0.806109	2.25957e-05	0.770742	1.26563e-05	0.784701	7.24255e-06	0.882159	3.72415e-06
220.54	0.855255	3.19716e-05	0.811486	1.96476e-05	0.75613	1.1005e-05	0.791111	6.29762e-06	0.879334	3.23826e-06
221.54	0.841636	2.78003e-05	0.779946	1.70842e-05	0.735004	9.56919e-06	0.776616	5.47597e-06	0.86107	2.81577e-06
222.54	0.81292	2.41732e-05	0.748368	1.48552e-05	0.717304	8.3207e-06	0.749866	4.76152e-06	0.849106	2.44839e-06
223.54	0.784935	2.10193e-05	0.738023	1.29171e-05	0.696701	7.23509e-06	0.728279	4.14028e-06	0.816026	2.12895e-06
224.54	0.740547	1.82769e-05	0.71846	1.12318e-05	0.673836	6.29113e-06	0.697243	3.6001e-06	0.80146	1.85119e-06
225.54	0.729322	1.58923e-05	0.722036	9.76637e-06	0.660192	5.47033e-06	0.686274	3.1304e-06	0.769964	1.60966e-06
226.54	0.690935	1.38189e-05	0.716426	8.49215e-06	0.658914	4.75661e-06	0.659743	2.72197e-06	0.73701	1.39965e-06
227.54	0.69229	1.20159e-05	0.733754	7.38418e-06	0.657027	4.13602e-06	0.66514	2.36684e-06	0.739881	1.21704e-06
228.54	0.694305	1.04482e-05	0.725365	6.42077e-06	0.659199	3.59639e-06	0.672497	2.05804e-06	0.755707	1.05825e-06
229.54	0.69665	9.08502e-06	0.721225	5.58305e-06	0.668184	3.12717e-06	0.648985	1.78952e-06	0.761416	9.20181e-07
230.54	0.706871	7.8997e-06	0.715881	4.85463e-06	0.660397	2.71917e-06	0.655209	1.55604e-06	0.784119	8.00125e-07
231.54	0.719868	6.86903e-06	0.696101	4.22125e-06	0.630032	2.3644e-06	0.636661	1.35303e-06	0.7773	6.95732e-07
232.54	0.699991	5.97283e-06	0.682284	3.6705e-06	0.628793	2.05592e-06	0.598212	1.1765e-06	0.77505	6.0496e-07
233.54	0.696434	5.19355e-06	0.666962	3.19161e-06	0.621132	1.78768e-06	0.59948	1.023e-06	0.777382	5.26031e-07
234.54	0.700562	4.51595e-06	0.659119	2.7752e-06	0.613892	1.55444e-06	0.614685	8.89529e-07	0.782509	4.574e-07
235.54	0.688982	3.92675e-06	0.631663	2.41312e-06	0.601884	1.35163e-06	0.617552	7.73473e-07	0.776462	3.97723e-07
236.54	0.685576	3.41443e-06	0.619458	2.09828e-06	0.586054	1.17529e-06	0.629865	6.72558e-07	0.769338	3.45832e-07
237.54	0.667435	2.96895e-06	0.602944	1.82452e-06	0.571114	1.02195e-06	0.621445	5.84809e-07	0.747666	3.00711e-07
238.54	0.658685	2.58159e-06	0.604663	1.58647e-06	0.578268	8.88613e-07	0.62414	5.08509e-07	0.742824	2.61477e-07
239.54	0.691281	2.24477e-06	0.625239	1.37949e-06	0.567658	7.72676e-07	0.63694	4.42164e-07	0.719256	2.27363e-07
240.54

## Sheet: biotin-C3d ISG65L2N188A etc.
Cycle: 17 ISG65L2ala 5000 nM_X	Cycle: 18 ISG65L2ala 5000 nM_Y	Fitted Cycle: 18 ISG65L2ala 50_Y	Cycle: 19 ISG65L2ala 2500 nM_Y	Fitted Cycle: 19 ISG65L2ala 25_Y	Cycle: 20 ISG65L2ala 1250 nM_Y	Fitted Cycle: 20 ISG65L2ala 12_Y	Cycle: 21 ISG65L2ala 625 nM_Y	Fitted Cycle: 21 ISG65L2ala 62_Y	Cycle: 22 ISG65L2ala 312.5 nM_Y	Fitted Cycle: 22 ISG65L2ala 31_Y
-60.38	-0.0936886	0	0.12036	0	0.101624	0	-0.0297855	0	-0.148561	0
-59.38	-0.0761106	0	0.116454	0	0.1026	0	-0.0327151	0	-0.164185	0
-58.38	-0.0565794	0	0.124267	0	0.104553	0	-0.0131838	0	-0.144654	0
-57.38	-0.0702515	0	0.137939	0	0.100647	0	-0.00927734	0	-0.162231	0
-56.38	-0.10697	0	0.134814	0	0.103968	0	-0.00283229	0	-0.182935	0
-55.38	-0.136657	0	0.135986	0	0.104553	0	0.0180662	0	-0.191529	0
-54.38	-0.152282	0	0.134032	0	0.10846	0	0.0317378	0	-0.18567	0
-53.38	-0.124548	0	0.128954	0	0.102991	0	0.0391598	0	-0.169264	0
-52.38	-0.11322	0	0.149657	0	0.130921	0	0.0502926	0	-0.160279	0
-51.38	-0.0835323	0	0.150438	0	0.142054	0	0.0801754	0	-0.147779	0
-50.38	-0.0682982	0	0.153564	0	0.107483	0	0.0659178	0	-0.146607	0
-49.38	-0.0667356	0	0.14497	0	0.112952	0	0.0584959	0	-0.153248	0
-48.38	-0.0835322	0	0.142625	0	0.11764	0	0.0811518	0	-0.157545	0
-47.38	-0.0581419	0	0.152392	0	0.0971315	0	0.0840819	0	-0.128247	0
-46.38	-0.086267	0	0.160595	0	0.0768189	0	0.0750976	0	-0.137622	0
-45.38	-0.0991577	0	0.138721	0	0.0902954	0	0.0596679	0	-0.141919	0
-44.38	-0.107361	0	0.122314	0	0.0879518	0	0.0346678	0	-0.134888	0
-43.38	-0.131189	0	0.123487	0	0.0826781	0	0.00869155	0	-0.1552	0
-42.38	-0.13236	0	0.103563	0	0.076624	0	0.0127925	0	-0.186842	0
-41.38	-0.103454	0	0.110595	0	0.11139	0	0.040527	0	-0.170045	0
-40.38	-0.0936885	0	0.122313	0	0.106507	0	0.0512691	0	-0.156374	0
-39.38	-0.0718141	0	0.101612	0	0.151819	0	0.0469728	0	-0.165356	0
-38.38	0.311097	0	0.13104	0	0.127259	0	-0.00341868	0	-0.130984	0
-37.38	1.05666	0	1.01869	0	0.898728	0	0.451858	0	0.230543	0
-36.38	-0.511413	0	-0.477847	0	-0.436034	0	0.438415	0	0.130613	0
-35.38	-0.23598	0	-0.216682	0	-0.0268734	0	-0.155988	0	-0.239876	0
-34.38	0.197631	0	0.0897241	0	0.133941	0	0.276215	0	0.147769	0
-33.38	0.120031	0	0.0134407	0	0.0806943	0	0.218317	0	0.0858895	0
-32.38	0.0864748	0	-0.0148565	0	0.0717958	0	0.158673	0	0.0494135	0
-31.38	0.0241946	0	-0.0145394	0	0.0366763	0	0.0988218	0	0.0368522	0
-30.38	-0.00721377	0	-0.15237	0	-0.154888	0	0.0469782	0	0.0196882	0
-29.38	-0.0245723	0	-0.0972427	0	0.0364019	0	0.0502681	0	0.0112168	0
-28.38	0.00391895	0	-0.0592422	0	0.0192083	0	0.0346248	0	0.0202866	0
-27.38	0.0164434	0	-0.0272354	0	-0.00150096	0	0.0339717	0	0.0241562	0
-26.38	0.0328496	0	-0.00553095	0	-0.0103633	0	0.0286739	0	0.0196155	0
-25.38	0.0282351	0	0.0091669	0	-0.0135435	0	0.0138487	0	0.0324213	0
-24.38	0.0212286	0	0.0099836	0	0.00334531	0	0.0182001	0	0.00552803	0
-23.38	0.0143194	0	0.00275713	0	0.00882626	0	0.0439081	0	0.0197859	0
-22.38	0.0275764	0	0.00821328	0	0.0168647	0	0.0531426	0	0.0368998	0
-21.38	0.0356814	0	0.0335199	0	0.0155398	0	0.0709471	0	0.0404169	0
-20.38	0.014124	0	0.0192735	0	0.00512132	0	0.0611628	0	0.0218369	0
-19.38	-0.031152	0	0.00855625	0	0.00821564	0	0.0471433	0	0.0126456	0
-18.38	-0.077038	0	-0.0251725	0	0.00111747	0	0.0229914	0	0.0115097	0
-17.38	-0.0724359	0	-0.0442278	0	-0.00197086	0	0.0113092	0	0.0201032	0
-16.38	-0.0528803	0	-0.0500383	0	-0.022851	0	-0.010108	0	0.0115462	0
-15.38	-0.0499626	0	-0.0521387	0	0.00969931	0	-0.00353476	0	-0.00239509	0
-14.38	-0.0113637	0	-0.0173004	0	0.0304759	0	0.0171316	0	0.0126679	0
-13.38	0.00482228	0	0.00713962	0	0.0227056	0	0.0191035	0	0.0194687	0
-12.38	-0.00800692	0	0.0137058	0	0.0441781	0	0.0177725	0	0.020969	0
-11.38	-0.00873958	0	0.0368388	0	0.0466193	0	0.0264398	0	0.0292705	0
-10.38	0.0115362	0	0.0217267	0	0.0370795	0	0.00900209	0	0.0277082	0
-9.38	0.00387036	0	0.0217141	0	0.0450996	0	0.00250781	0	0.0157327	0
-8.38	0.0104258	0	0.0263397	0	0.0406993	0	0.0162465	0	0.0221893	0
-7.38	0.0340953	0	0.0407805	0	0.0593639	0	0.025414	0	0.0235075	0
-6.38	0.070289	0	0.0822239	0	0.08686	0	0.0408866	0	0.0441379	0
-5.38	0.0943125	0	0.120505	0	0.104872	0	0.0552847	0	0.0884005	0
-4.38	0.10868	0	0.106637	0	0.0885693	0	0.10949	0	0.138497	0
-3.38	0.0935118	0	0.204938	0	0.239233	0	0.19668	0	0.272748	0
-2.38	-0.0721767	0	-0.291893	0	-0.501071	0	-0.218473	0	-0.383629	0
-1.38	0.892683	0	0.948294	0	1.41609	0	0.825365	0	0.850882	0
-0.380005	0.0184401	0	0.417397	0	1.00422	0.981232	0.883659	0	0.162758	0
0.619995	8.4931	9.46743	5.67774	5.78579	3.89679	3.77247	1.85065	1.35824	1.8512	0.736225
1.62	19.2552	19.0434	10.9309	10.6943	6.57351	6.19043	2.84532	2.65764	1.84921	1.38406
2.62	28.5321	26.8352	16.0629	14.8585	9.31829	8.28502	4.46442	3.79507	2.59495	1.9541
3.62	35.3394	33.1753	19.883	18.3914	11.4189	10.0995	5.69649	4.79073	3.24649	2.45571
4.62	40.4895	38.3342	22.9402	21.3885	13.1478	11.6713	6.78947	5.66229	3.79333	2.89709
5.62	44.2701	42.5318	25.4114	23.9312	14.3706	13.0329	7.54495	6.42521	4.19034	3.28547
6.62	47.1524	45.9474	27.4428	26.0884	15.4194	14.2125	8.20145	7.09303	4.509	3.62723
7.62	49.3238	48.7265	28.9638	27.9185	16.3405	15.2342	8.76851	7.67762	4.78004	3.92795
8.62	51.0891	50.9879	30.2256	29.471	17.0868	16.1194	9.18884	8.18933	5.04638	4.19257
9.62	52.4981	52.8279	31.278	30.7882	17.7764	16.8861	9.64102	8.63727	5.31286	4.42541
10.62	53.6276	54.3251	32.1359	31.9056	18.3353	17.5503	10.0109	9.02937	5.55758	4.6303
11.62	54.5516	55.5434	32.8767	32.8536	18.7858	18.1257	10.3676	9.3726	5.78232	4.81059
12.62	55.3502	56.5346	33.5147	33.6579	19.2188	18.6242	10.6787	9.67305	5.96114	4.96923
13.62	56.0159	57.3412	34.0786	34.3402	19.603	19.0559	10.9046	9.93604	6.06545	5.10882
14.62	56.4948	57.9974	34.5568	34.919	19.8433	19.43	11.1245	10.1663	6.23085	5.23165
15.62	56.8355	58.5314	34.9349	35.4101	20.098	19.754	11.3246	10.3678	6.44024	5.33974
16.62	57.2628	58.966	35.2533	35.8267	20.3687	20.0347	11.4802	10.5442	6.60381	5.43484
17.62	57.587	59.3195	35.4796	36.1802	20.4969	20.2778	11.6103	10.6986	6.67484	5.51853
18.62	57.7781	59.6072	35.6633	36.48	20.6137	20.4885	11.7276	10.8338	6.65766	5.59217
19.62	58.0129	59.8413	35.858	36.7344	20.7702	20.6709	11.8736	10.9521	6.73315	5.65697
20.62	58.2027	60.0317	36.0359	36.9502	20.8818	20.829	11.9693	11.0557	6.82037	5.71399
21.62	58.3117	60.1867	36.1688	37.1333	20.9818	20.9659	12.0633	11.1463	6.84918	5.76416
22.62	58.4646	60.3128	36.2662	37.2886	21.057	21.0845	12.1223	11.2257	6.84416	5.8083
23.62	58.5641	60.4154	36.3208	37.4204	21.092	21.1873	12.1528	11.2951	6.90609	5.84715
24.62	58.6938	60.4989	36.4724	37.5322	21.2029	21.2763	12.2194	11.3559	6.96273	5.88133
25.62	58.8502	60.5668	36.5695	37.627	21.2523	21.3534	12.2812	11.4092	6.98178	5.91141
26.62	58.9592	60.6221	36.6542	37.7075	21.3221	21.4202	12.3021	11.4558	7.01418	5.93788
27.62	59.0312	60.6671	36.6661	37.7758	21.3942	21.478	12.3248	11.4966	6.98499	5.96117
28.62	59.0917	60.7037	36.7675	37.8337	21.4563	21.5281	12.38	11.5323	7.03802	5.98166
29.62	59.1391	60.7335	36.7645	37.8828	21.5135	21.5715	12.4177	11.5635	7.05724	5.99969
30.62	59.2098	60.7577	36.8192	37.9245	21.5587	21.6092	12.4768	11.5909	7.07953	6.01556
31.62	59.2365	60.7774	36.8951	37.9598	21.5812	21.6417	12.5048	11.6148	7.15388	6.02952
32.62	59.3028	60.7934	36.9696	37.9898	21.6289	21.67	12.5667	11.6358	7.18619	6.04181
33.62	59.3438	60.8065	37.0009	38.0153	21.6911	21.6944	12.5745	11.6541	7.2171	6.05262
34.62	59.3523	60.8171	36.99	38.0369	21.7113	21.7156	12.5644	11.6702	7.25515	6.06213
35.62	59.3916	60.8257	36.9781	38.0552	21.6644	21.7339	12.5851	11.6842	7.25139	6.0705
36.62	59.4041	60.8328	36.9873	38.0707	21.6548	21.7498	12.5799	11.6966	7.24917	6.07787
37.62	59.3862	60.8385	37.035	38.0839	21.7255	21.7636	12.5826	11.7073	7.24178	6.08435
38.62	59.46	60.8432	37.0367	38.0951	21.8122	21.7755	12.6221	11.7168	7.26787	6.09005
39.62	59.5218	60.8469	37.0237	38.1046	21.8634	21.7859	12.6686	11.725	7.30249	6.09507
40.62	59.4899	60.85	37.0451	38.1126	21.8882	21.7948	12.698	11.7322	7.3172	6.09949
41.62	59.4608	60.8525	37.0619	38.1194	21.8907	21.8026	12.7415	11.7386	7.34182	6.10337
42.62	59.5142	60.8546	37.0944	38.1252	21.8925	21.8093	12.7492	11.7441	7.36151	6.10679
43.62	59.4865	60.8562	37.1168	38.1302	21.8682	21.8151	12.7696	11.7489	7.34988	6.1098
44.62	59.4919	60.8576	37.1272	38.1343	21.8622	21.8201	12.799	11.7532	7.37474	6.11245
45.62	59.5047	60.8587	37.1294	38.1379	21.897	21.8245	12.7939	11.7569	7.39645	6.11478
46.62	59.5275	60.8596	37.1297	38.1409	21.929	21.8283	12.7815	11.7601	7.4129	6.11682
47.62	59.5552	60.8603	37.1406	38.1434	21.9222	21.8316	12.7783	11.763	7.4147	6.11863
48.62	59.5691	60.8609	37.1411	38.1456	21.8936	21.8344	12.8165	11.7655	7.41473	6.12022
49.62	59.5529	60.8614	37.1602	38.1474	21.8949	21.8369	12.8545	11.7677	7.41598	6.12161
50.62	59.5465	60.8618	37.1744	38.149	21.8974	21.839	12.8716	11.7696	7.43843	6.12284
51.62	59.5479	60.8621	37.1967	38.1503	21.9388	21.8408	12.881	11.7712	7.46062	6.12392
52.62	59.568	60.8623	37.2277	38.1514	21.9499	21.8424	12.9189	11.7727	7.4834	6.12487
53.62	59.571	60.8626	37.2253	38.1523	21.9555	21.8438	12.9052	11.774	7.49384	6.12571
54.62	59.5528	60.8627	37.2294	38.1531	21.9418	21.845	12.9089	11.7751	7.49647	6.12645
55.62	59.5541	60.8629	37.216	38.1538	21.9473	21.846	12.9134	11.7761	7.50074	6.1271
56.62	59.559	60.863	37.22	38.1544	21.9716	21.8469	12.9398	11.7769	7.53467	6.12767
57.62	59.5752	60.8631	37.2739	38.1549	22.0063	21.8477	12.9823	11.7777	7.56089	6.12817
58.62	59.6185	60.8632	37.3212	38.1553	22.0596	21.8484	13.0168	11.7784	7.5965	6.12861
59.62	59.6391	60.8632	37.3709	38.1557	22.0896	21.849	13.0389	11.7789	7.62853	6.129
60.62	59.6668	60.8633	37.4047	38.156	22.1222	21.8495	13.0659	11.7794	7.64241	6.12934
61.62	59.6879	60.8633	37.4032	38.1562	22.1276	21.8499	13.0961	11.7799	7.67495	6.12964
62.62	59.7178	60.8633	37.4157	38.1564	22.1272	21.8503	13.127	11.7803	7.72036	6.12991
63.62	59.6868	60.8634	37.3913	38.1566	22.072	21.8506	13.1286	11.7806	7.76866	6.13014
64.62	59.6774	60.8634	37.3036	38.1568	22.0114	21.8509	13.0541	11.7809	7.80363	6.13034
65.62	59.7983	60.8634	37.4566	38.1569	22.1667	21.8512	13.163	11.7812	7.84027	6.13052
66.62	59.9622	60.8634	37.6371	38.157	22.3194	21.8514	13.3104	11.7814	7.82351	6.13068
67.62	60.1085	60.8634	37.7934	38.1571	22.4624	21.8516	13.5068	11.7816	7.82217	6.13082
68.62	60.1876	60.8634	37.8993	38.1572	22.5935	21.8517	13.6925	11.7818	7.81243	6.13095
69.62	60.1995	60.8634	37.9476	38.1573	22.6708	21.8519	13.7812	11.7819	7.8003	6.13105
70.62	60.1715	60.8635	37.9411	38.1573	22.6691	21.852	13.7729	11.782	7.76961	6.13115
71.62	60.0873	60.8635	37.8987	38.1574	22.6454	21.8521	13.7735	11.7822	7.75511	6.13123
72.62	60.0399	60.8635	37.8658	38.1574	22.6334	21.8522	13.8021	11.7823	7.80456	6.13131
73.62	60.0027	60.8635	37.8246	38.1574	22.6347	21.8523	13.8089	11.7824	7.84302	6.13137
74.62	59.9729	60.8635	37.8144	38.1575	22.6385	21.8523	13.8081	11.7824	7.87357	6.13143
75.62	59.9156	60.8635	37.7996	38.1575	22.6539	21.8524	13.8059	11.7825	7.90984	6.13148
76.62	59.8563	60.8635	37.7593	38.1575	22.632	21.8524	13.8026	11.7826	7.92676	6.13152
77.62	59.7738	60.8635	37.6943	38.1575	22.6461	21.8525	13.7641	11.7826	7.92732	6.13156
78.62	59.7501	60.8635	37.6779	38.1576	22.6359	21.8525	13.7775	11.7827	7.96103	6.1316
79.62	59.8166	60.8635	37.7175	38.1576	22.642	21.8526	13.8026	11.7827	8.02351	6.13163
80.62	59.8925	60.8635	37.7306	38.1576	22.6906	21.8526	13.8263	11.7827	8.03473	6.13165
81.62	59.9451	60.8635	37.677	38.1576	22.6416	21.8526	13.7885	11.7828	7.99628	6.13168
82.62	59.988	60.8635	37.6253	38.1576	22.5723	21.8526	13.7811	11.7828	7.98532	6.1317
83.62	60.0233	60.8635	37.6254	38.1576	22.5807	21.8527	13.8084	11.7828	8.02998	6.13171
84.62	60.0801	60.8635	37.661	38.1576	22.6204	21.8527	13.8098	11.7828	8.05888	6.13173
85.62	60.1776	60.8635	37.7038	38.1576	22.6701	21.8527	13.8283	11.7829	8.09192	6.13174
86.62	60.2534	60.8635	37.713	38.1576	22.6808	21.8527	13.8519	11.7829	8.17465	6.13176
87.62	60.2135	60.8635	37.697	38.1576	22.7	21.8527	13.8298	11.7829	8.2406	6.13177
88.62	60.1929	60.8635	37.6673	38.1576	22.6782	21.8527	13.7877	11.7829	8.23514	6.13178
89.62	60.1524	60.8635	37.6466	38.1576	22.6239	21.8527	13.7386	11.7829	8.22257	6.13179
90.62	60.0763	60.8635	37.5998	38.1576	22.6029	21.8527	13.7209	11.7829	8.23434	6.13179
91.62	60.0404	60.8635	37.5175	38.1576	22.6077	21.8527	13.7388	11.7829	8.25487	6.1318
92.62	60.0285	60.8635	37.4501	38.1576	22.5876	21.8527	13.7206	11.7829	8.27296	6.1318
93.62	59.996	60.8635	37.4038	38.1576	22.5406	21.8527	13.6487	11.7829	8.27863	6.13181
94.62	59.972	60.8635	37.355	38.1576	22.4664	21.8528	13.6054	11.7829	8.29743	6.13181
95.62	59.914	60.8635	37.3211	38.1576	22.3926	21.8528	13.5831	11.7829	8.3187	6.13182
96.62	59.9209	60.8635	37.277	38.1576	22.3614	21.8528	13.5635	11.7829	8.28771	6.13182
97.62	59.9587	60.8635	37.2618	38.1576	22.335	21.8528	13.5552	11.783	8.26609	6.13182
98.62	60.0209	60.8635	37.2923	38.1576	22.3249	21.8528	13.559	11.783	8.29185	6.13183
99.62	60.0259	60.8635	37.3365	38.1576	22.3134	21.8528	13.569	11.783	8.2934	6.13183
100.62	60.0365	60.8635	37.3617	38.1576	22.2829	21.8528	13.5457	11.783	8.23496	6.13183
101.62	60.0414	60.8635	37.3347	38.1576	22.244	21.8528	13.5112	11.783	8.24072	6.13183
102.62	60.0213	60.8635	37.2654	38.1576	22.1852	21.8528	13.4861	11.783	8.24973	6.13183
103.62	59.9987	60.8635	37.2206	38.1576	22.1434	21.8528	13.4574	11.783	8.24475	6.13184
104.62	59.9872	60.8635	37.2115	38.1576	22.1326	21.8528	13.4143	11.783	8.26017	6.13184
105.62	59.96	60.8635	37.2229	38.1576	22.1171	21.8528	13.3991	11.783	8.30215	6.13184
106.62	59.9449	60.8635	37.2263	38.1576	22.1194	21.8528	13.3997	11.783	8.31397	6.13184
107.62	59.9232	60.8635	37.2332	38.1576	22.1154	21.8528	13.3958	11.783	8.29785	6.13184
108.62	59.8998	60.8635	37.1864	38.1576	22.0716	21.8528	13.3499	11.783	8.27025	6.13184
109.62	59.8438	60.8635	37.1309	38.1576	22.0528	21.8528	13.3162	11.783	8.20541	6.13184
110.62	59.7904	60.8635	37.1097	38.1576	22.0521	21.8528	13.3052	11.783	8.19044	6.13184
111.62	59.7897	60.8635	37.12	38.1576	22.0604	21.8528	13.2903	11.783	8.19094	6.13184
112.62	59.8025	60.8635	37.1412	38.1576	22.0736	21.8528	13.3037	11.783	8.23683	6.13184
113.62	59.8191	60.8635	37.173	38.1576	22.0469	21.8528	13.3256	11.783	8.27684	6.13184
114.62	59.825	60.8635	37.2393	38.1576	22.0655	21.8528	13.3332	11.783	8.3138	6.13184
115.62	59.8586	60.8635	37.286	38.1576	22.0641	21.8528	13.3636	11.783	8.328	6.13184
116.62	59.8418	60.8635	37.2592	38.1576	22.0273	21.8528	13.2895	11.783	8.31422	6.13184
117.62	59.8812	60.8635	37.3936	38.1576	22.1413	21.8528	13.3303	11.783	8.3957	6.13184
118.62	59.5377	60.8635	36.4589	38.1576	20.8201	21.8528	12.8212	11.783	7.56884	6.13184
119.62	59.0117	60.8635	36.2915	38.1576	21.2594	21.2708	12.558	11.783	8.58263	6.13185
120.62	51.9743	55.038	31.742	33.7518	18.4983	18.8148	12.1842	10.6552	7.40281	5.47737
121.62	45.0145	48.683	27.5039	29.8547	16.0432	16.6424	10.5155	9.42496	6.64057	4.84494
122.62	38.7841	43.0618	23.7971	26.4076	14.0389	14.7208	9.20478	8.33673	5.94172	4.28553
123.62	33.6321	38.0897	20.6897	23.3584	12.3913	13.0211	8.26462	7.37415	5.3896	3.79072
124.62	29.3045	33.6917	18.1417	20.6614	11.0115	11.5176	7.38991	6.52271	4.95786	3.35303
125.62	25.7206	29.8015	16.0685	18.2758	9.8887	10.1878	6.71732	5.76958	4.58191	2.96588
126.62	22.746	26.3605	14.3605	16.1656	8.99108	9.01148	6.16846	5.10341	4.31334	2.62344
127.62	20.2153	23.3169	12.8284	14.2991	8.09994	7.97099	5.69047	4.51416	4.00402	2.32052
128.62	18.0346	20.6246	11.4992	12.6481	7.37585	7.05064	5.28107	3.99294	3.77765	2.05259
129.62	16.1758	18.2432	10.3288	11.1877	6.80714	6.23656	4.90789	3.53191	3.56015	1.81559
130.62	14.6227	16.1368	9.43256	9.89591	6.32779	5.51647	4.5947	3.12411	3.41016	1.60596
131.62	13.2717	14.2736	8.68933	8.75331	5.86462	4.87952	4.32617	2.76339	3.30603	1.42053
132.62	12.0539	12.6255	7.98738	7.74263	5.46967	4.31612	4.09704	2.44432	3.21535	1.25651
133.62	11.1036	11.1678	7.37104	6.84864	5.16815	3.81777	3.94421	2.16209	3.099	1.11143
134.62	10.1892	9.8783	6.86751	6.05788	4.86558	3.37696	3.76473	1.91245	2.99232	0.983098
135.62	9.45151	8.73773	6.45576	5.35843	4.63389	2.98705	3.63552	1.69163	2.88954	0.869586
136.62	8.81017	7.72885	6.08	4.73973	4.41228	2.64216	3.5204	1.49631	2.79966	0.76918
137.62	8.22024	6.83645	5.68639	4.19247	4.21627	2.33709	3.35703	1.32354	2.7293	0.680368
138.62	7.7609	6.0471	5.37831	3.7084	4.08243	2.06724	3.26913	1.17072	2.68483	0.601811
139.62	7.3108	5.34889	5.10873	3.28022	3.87364	1.82855	3.15944	1.03554	2.67654	0.532324
140.62	6.85861	4.73129	4.90227	2.90148	3.71127	1.61742	3.01554	0.915976	2.57628	0.47086
141.62	6.51117	4.18501	4.66986	2.56646	3.6131	1.43067	2.93567	0.810215	2.50214	0.416493
142.62	6.22373	3.7018	4.48219	2.27013	3.55384	1.26548	2.90515	0.716665	2.47145	0.368403
143.62	5.95391	3.27438	4.29862	2.00801	3.45385	1.11936	2.81245	0.633916	2.4332	0.325866
144.62	5.73275	2.89631	4.19933	1.77616	3.39425	0.990114	2.73606	0.560722	2.44213	0.28824
145.62	5.59045	2.5619	4.09833	1.57108	3.34323	0.875792	2.72037	0.495979	2.4469	0.254959
146.62	5.3922	2.26609	4.01994	1.38968	3.29055	0.77467	2.69621	0.438712	2.38938	0.225521
147.62	5.20768	2.00444	3.88942	1.22922	3.21696	0.685224	2.6329	0.388056	2.34791	0.199481
148.62	5.04095	1.773	3.79407	1.08729	3.1412	0.606106	2.58609	0.34325	2.34894	0.176448
149.62	4.8889	1.56828	3.69681	0.961748	3.10494	0.536123	2.59642	0.303617	2.35758	0.156075
150.62	4.81365	1.3872	3.63553	0.850702	3.08284	0.47422	2.58696	0.268561	2.37015	0.138054
151.62	4.75513	1.22703	3.52887	0.752477	3.04517	0.419465	2.5575	0.237552	2.35651	0.122114
152.62	4.61739	1.08536	3.41478	0.665593	3.00115	0.371032	2.49049	0.210123	2.28649	0.108014
153.62	4.50433	0.960037	3.3523	0.588742	2.97253	0.328192	2.46027	0.185862	2.25171	0.0955426
154.62	4.42443	0.849187	3.29331	0.520763	2.95461	0.290298	2.42448	0.164401	2.22391	0.0845109
155.62	4.33483	0.751137	3.26157	0.460634	2.93676	0.256779	2.38636	0.145419	2.19498	0.074753
156.62	4.26929	0.664408	3.23376	0.407448	2.89444	0.22713	2.38986	0.128629	2.18555	0.0661218
157.62	4.21826	0.587694	3.18054	0.360403	2.84576	0.200905	2.39093	0.113777	2.16992	0.0584871
158.62	4.14922	0.519836	3.12272	0.318789	2.79219	0.177708	2.37407	0.10064	2.14164	0.051734
159.62	4.06572	0.459814	3.10093	0.281981	2.76421	0.157189	2.33339	0.0890194	2.12614	0.0457606
160.62	3.99569	0.406723	3.0819	0.249422	2.75976	0.13904	2.28394	0.0787409	2.11534	0.0404769
161.62	3.97705	0.359761	3.07764	0.220623	2.75168	0.122986	2.26468	0.0696492	2.10083	0.0358033
162.62	3.95428	0.318222	3.0694	0.195149	2.74026	0.108785	2.25308	0.0616073	2.08295	0.0316694
163.62	3.91418	0.281479	3.05158	0.172617	2.7276	0.0962245	2.27087	0.0544939	2.07019	0.0280127
164.62	3.83827	0.248978	3.01309	0.152686	2.71882	0.0851141	2.26659	0.0482019	2.06613	0.0247783
165.62	3.77202	0.22023	2.95933	0.135056	2.7256	0.0752865	2.23716	0.0426363	2.05997	0.0219173
166.62	3.72045	0.194802	2.92167	0.119462	2.69445	0.0665937	2.20784	0.0377134	2.06138	0.0193866
167.62	3.71409	0.172309	2.90864	0.105669	2.66324	0.0589046	2.1932	0.0333589	2.04823	0.0171482
168.62	3.68593	0.152414	2.92172	0.0934678	2.63844	0.0521032	2.18456	0.0295071	2.04153	0.0151682
169.62	3.63335	0.134816	2.91428	0.0826757	2.61693	0.0460872	2.18031	0.0261001	2.02775	0.0134168
170.62	3.59618	0.119249	2.90177	0.0731296	2.61827	0.0407658	2.17421	0.0230865	2.02189	0.0118677
171.62	3.58577	0.105481	2.89828	0.0646859	2.64064	0.0360589	2.17235	0.0204209	2.03097	0.0104974
172.62	3.60269	0.0933014	2.90453	0.057217	2.63763	0.0318954	2.17786	0.018063	2.03447	0.00928534
173.62	3.61063	0.0825285	2.91609	0.0506105	2.6171	0.0282127	2.17385	0.0159774	2.03425	0.00821322
174.62	3.59254	0.0729995	2.88967	0.0447669	2.5843	0.0249551	2.17345	0.0141326	2.00161	0.00726489
175.62	3.54716	0.0645707	2.84797	0.0395979	2.55619	0.0220737	2.15304	0.0125008	1.96809	0.00642606
176.62	3.47509	0.0571152	2.78184	0.0350258	2.515	0.019525	2.1241	0.0110574	1.96256	0.00568409
177.62	3.42975	0.0505205	2.75208	0.0309816	2.47449	0.0172706	2.11499	0.00978069	1.96045	0.00502779
178.62	3.39981	0.0446872	2.71831	0.0274044	2.45934	0.0152765	2.10425	0.00865138	1.95916	0.00444726
179.62	3.37537	0.0395275	2.68304	0.0242402	2.44156	0.0135126	2.10873	0.00765246	1.95984	0.00393376
180.62	3.34803	0.0349635	2.68038	0.0214413	2.43446	0.0119524	2.08947	0.00676888	1.94552	0.00347956
181.62	3.32821	0.0309265	2.68529	0.0189656	2.42684	0.0105723	2.08799	0.00598732	1.92138	0.0030778
182.62	3.31809	0.0273556	2.67598	0.0167758	2.39814	0.00935161	2.06274	0.00529601	1.89876	0.00272242
183.62	3.32189	0.024197	2.65586	0.0148388	2.38069	0.00827184	2.06022	0.00468451	1.86704	0.00240808
184.62	3.3217	0.0214032	2.64432	0.0131255	2.36925	0.00731674	2.07136	0.00414362	1.86057	0.00213004
185.62	3.31842	0.0189319	2.62415	0.01161	2.37152	0.00647193	2.07605	0.00366519	1.86316	0.0018841
186.62	3.2812	0.0167459	2.61044	0.0102694	2.36305	0.00572466	2.06151	0.00324199	1.858	0.00166655
187.62	3.25902	0.0148124	2.60526	0.00908369	2.34581	0.00506367	2.04945	0.00286766	1.86448	0.00147413
188.62	3.23138	0.0131021	2.5799	0.00803486	2.34958	0.004479	2.03128	0.00253655	1.86841	0.00130392
189.62	3.2254	0.0115893	2.56592	0.00710713	2.34323	0.00396184	2.01602	0.00224367	1.8642	0.00115336
190.62	3.2099	0.0102512	2.54669	0.00628651	2.33255	0.00350439	1.98886	0.00198461	1.85938	0.00102019
191.62	3.19305	0.00906752	2.53082	0.00556065	2.33759	0.00309976	1.97723	0.00175546	1.84509	0.000902398
192.62	3.1911	0.00802056	2.53949	0.0049186	2.33423	0.00274185	1.97461	0.00155277	1.83112	0.000798204
193.62	3.18329	0.00709448	2.54968	0.00435068	2.3327	0.00242527	1.95795	0.00137348	1.81348	0.000706041
194.62	3.1833	0.00627532	2.54635	0.00384834	2.3271	0.00214524	1.95574	0.00121489	1.79537	0.000624519
195.62	3.18302	0.00555075	2.54316	0.003404	2.32673	0.00189754	1.95409	0.00107462	1.80207	0.00055241
196.62	3.18134	0.00490985	2.51685	0.00301096	2.31787	0.00167845	1.96301	0.000950539	1.81512	0.000488627
197.62	3.1722	0.00434294	2.49645	0.0026633	2.31433	0.00148465	1.95215	0.000840787	1.81737	0.000432208
198.62	3.16782	0.00384149	2.47169	0.00235579	2.30518	0.00131323	1.958	0.000743707	1.8141	0.000382304
199.62	3.15674	0.00339794	2.43951	0.00208378	2.28485	0.0011616	1.95032	0.000657836	1.80304	0.000338162
200.62	3.13575	0.0030056	2.4302	0.00184318	2.25279	0.00102747	1.92556	0.00058188	1.77419	0.000299117
201.62	3.12548	0.00265856	2.40507	0.00163036	2.24465	0.000908839	1.90501	0.000514694	1.75223	0.00026458
202.62	3.11559	0.0023516	2.39512	0.00144211	2.23754	0.000803901	1.88813	0.000455266	1.74405	0.00023403
203.62	3.11122	0.00208007	2.38656	0.0012756	2.22578	0.00071108	1.87889	0.000402699	1.75637	0.000207008
204.62	3.09824	0.0018399	2.38948	0.00112832	2.22892	0.000628976	1.87069	0.000356202	1.75483	0.000183107
205.62	3.09194	0.00162746	2.39928	0.000998038	2.23593	0.000556353	1.89969	0.000315074	1.78191	0.000161964
206.62	3.10203	0.00143955	2.42781	0.000882801	2.24491	0.000492114	1.91873	0.000278694	1.80421	0.000143263
207.62	3.10195	0.00127333	2.43669	0.00078087	2.27456	0.000435293	1.93955	0.000246515	1.81664	0.000126722
208.62	3.10953	0.00112631	2.43837	0.000690708	2.28849	0.000385033	1.95016	0.000218052	1.83626	0.00011209
209.62	3.11434	0.000996262	2.42406	0.000610957	2.2926	0.000340576	1.92805	0.000192875	1.84301	9.91478e-05
210.62	3.06963	0.00088123	2.37577	0.000540414	2.27498	0.000301252	1.91746	0.000170605	1.8339	8.76998e-05
211.62	3.04359	0.00077948	2.32907	0.000478016	2.24266	0.000266468	1.89559	0.000150906	1.80892	7.75737e-05
212.62	3.01676	0.000689479	2.29622	0.000422822	2.20557	0.000235701	1.88073	0.000133482	1.79493	6.86168e-05
213.62	2.97888	0.000609869	2.28809	0.000374002	2.18393	0.000208486	1.8616	0.00011807	1.75787	6.06941e-05
214.62	2.98334	0.000539452	2.29871	0.000330818	2.18588	0.000184413	1.86258	0.000104437	1.72931	5.36861e-05
215.62	2.9967	0.000477165	2.29669	0.000292621	2.17087	0.00016312	1.85214	9.23784e-05	1.71844	4.74873e-05
216.62	3.00226	0.00042207	2.30188	0.000258834	2.17441	0.000144286	1.8436	8.17121e-05	1.71295	4.20043e-05
217.62	3.00559	0.000373336	2.29024	0.000228948	2.18467	0.000127626	1.84463	7.22774e-05	1.71077	3.71543e-05
218.62	3.0046	0.00033023	2.26311	0.000202513	2.15014	0.00011289	1.82508	6.3932e-05	1.713	3.28644e-05
219.62	2.99152	0.0002921	2.23846	0.00017913	2.1257	9.98554e-05	1.78445	5.65502e-05	1.70978	2.90697e-05
220.62	2.9854	0.000258373	2.24405	0.000158447	2.10796	8.83258e-05	1.79396	5.00207e-05	1.7219	2.57133e-05
221.62	2.99885	0.000228541	2.25668	0.000140152	2.1035	7.81274e-05	1.81826	4.42451e-05	1.72103	2.27443e-05
222.62	2.98389	0.000202153	2.25885	0.00012397	2.10233	6.91065e-05	1.8129	3.91364e-05	1.71881	2.01182e-05
223.62	2.97203	0.000178811	2.25803	0.000109656	2.12072	6.11273e-05	1.82386	3.46176e-05	1.69181	1.77953e-05
224.62	2.9688	0.000158165	2.24491	9.69947e-05	2.12502	5.40693e-05	1.81315	3.06206e-05	1.64945	1.57406e-05
225.62	2.92932	0.000139903	2.23511	8.57953e-05	2.11459	4.78263e-05	1.77359	2.7085e-05	1.61646	1.39231e-05
226.62	2.90016	0.000123749	2.20565	7.58891e-05	2.07728	4.23041e-05	1.75078	2.39577e-05	1.60513	1.23155e-05
227.62	2.891	0.000109461	2.17959	6.71267e-05	2.04628	3.74195e-05	1.73491	2.11914e-05	1.60012	1.08935e-05
228.62	2.87241	9.6822e-05	2.1783	5.9376e-05	2.03077	3.30989e-05	1.75042	1.87446e-05	1.58876	9.63571e-06
229.62	2.86945	8.56426e-05	2.17877	5.25203e-05	2.02847	2.92772e-05	1.76212	1.65803e-05	1.57819	8.52314e-06
230.62	2.85444	7.5754e-05	2.19558	4.64561e-05	2.04536	2.58968e-05	1.76995	1.46659e-05	1.57229	7.53903e-06
231.62	2.8626	6.70072e-05	2.18204	4.10921e-05	2.06972	2.29066e-05	1.78178	1.29725e-05	1.57963	6.66854e-06
232.62	2.85767	5.92703e-05	2.16327	3.63475e-05	2.05847	2.02618e-05	1.76642	1.14747e-05	1.56433	5.89857e-06
233.62	2.83455	5.24268e-05	2.1238	3.21507e-05	2.05339	1.79223e-05	1.74501	1.01498e-05	1.56112	5.2175e-06
234.62	2.83557	4.63734e-05	2.1142	2.84385e-05	2.03082	1.58529e-05	1.73737	8.97783e-06	1.5741	4.61507e-06
235.62	2.83495	4.1019e-05	2.12302	2.51549e-05	2.00881	1.40225e-05	1.74778	7.94122e-06	1.57596	4.0822e-06
236.62	2.83678	3.62828e-05	2.13321	2.22504e-05	1.99129	1.24034e-05	1.73289	7.0243e-06	1.5604	3.61086e-06
237.62	2.82806	3.20935e-05	2.1405	1.96813e-05	1.99429	1.09713e-05	1.72824	6.21325e-06	1.57428	3.19393e-06
238.62	2.82428	2.83878e-05	2.13794	1.74088e-05	1.98895	9.70448e-06	1.71533	5.49585e-06	1.5636	2.82515e-06
239.62	2.80664	2.51101e-05	2.12061	1.53987e-05	1.97867	8.58397e-06	1.70761	4.86128e-06	1.55286	2.49895e-06
240.62
