# Supplementary material for: Molecular mechanism of complement inhibition by the trypanosome receptor ISG65
Source: eLife. 2024 Apr 24;12:RP88960. doi: 10.7554/eLife.88960 (PMC11042801; doi:10.7554/eLife.88960)
Supplement: Figure 2—figure supplement 1—source data 2. [file elife-88960-fig2-figsupp1-data2.xlsx]

## Sheet: biotin-C3b ISG65
Cycle: 1 ISG65WT 5000 nM_X	Cycle: 2 ISG65WT 5000 nM_Y	Fitted Cycle: 2 ISG65WT 5000 n_Y	Cycle: 3 ISG65WT 2500 nM_Y	Fitted Cycle: 3 ISG65WT 2500 n_Y	Cycle: 4 ISG65WT 1250 nM_Y	Fitted Cycle: 4 ISG65WT 1250 n_Y	Cycle: 5 ISG65WT 625 nM_Y	Fitted Cycle: 5 ISG65WT 625 nM_Y	Cycle: 6 ISG65WT 312.5 nM_Y	Fitted Cycle: 6 ISG65WT 312.5 _Y
-60.26	-1.02915	0	-0.721822	0	-0.919067	0	-0.873657	0	-0.533346	0
-59.26	-0.704152	0	-0.456981	0	-0.387817	0	-0.483032	0	-0.348582	0
-58.26	-0.769386	0	-0.569481	0	-0.23938	0	-0.348267	0	-0.252098	0
-57.26	-1.00884	0	-0.76948	0	-0.249146	0	-0.267212	0	-0.202097	0
-56.26	-1.00806	0	-0.821042	0	-0.428833	0	-0.53479	0	-0.294675	0
-55.26	-0.826418	0	-0.684324	0	-0.380005	0	-0.377563	0	-0.306394	0
-54.26	-0.692433	0	-0.578074	0	-0.338989	0	-0.264282	0	-0.270457	0
-53.26	-0.656105	0	-0.506981	0	-0.288208	0	-0.229126	0	-0.238426	0
-52.26	-0.688136	0	-0.435887	0	-0.198364	0	-0.109009	0	-0.206395	0
-51.26	-0.763526	0	-0.467919	0	-0.139771	0	-0.0982666	0	-0.199364	0
-50.26	-0.895948	0	-0.583544	0	-0.106567	0	-0.108032	0	-0.225146	0
-49.26	-0.00766778	0	-0.0948713	0	-0.258911	0	-0.277954	0	-0.256004	0
-48.26	0.0294468	0	-0.00112629	0	0.360229	0	0.220093	0	-0.132962	0
-47.26	0.0470204	0	-0.159325	0	-0.241333	0	-0.299438	0	-0.259911	0
-46.26	0.0833483	0	0.286769	0	-0.0675049	0	-0.118774	0	-0.194676	0
-45.26	-1.28658	0	-0.993698	0	0.0496826	0	-0.138306	0	-0.00444031	0
-44.26	-1.66939	0	-1.35893	0	-0.547974	0	-0.383423	0	-0.301315	0
-43.26	-0.453766	0	-0.166351	0	-1.09875	0	-0.633423	0	-0.628265	0
-42.26	0.934525	0	0.363327	0	0.369995	0	0.0804443	0	0.0127411	0
-41.26	0.477885	0	0.249655	0	0.452026	0	0.265015	0	0.00649047	0
-40.26	-0.0576653	0	-0.154249	0	0.071167	0	-0.117798	0	-0.106397	0
-39.26	-0.169385	0	-0.202685	0	-0.149536	0	-0.265259	0	-0.174365	0
-38.26	-0.149854	0	-0.471484	0	-0.178833	0	-0.304321	0	-0.174365	0
-37.26	-0.339259	0	-0.302465	0	-0.252686	0	-0.382751	0	-0.211278	0
-36.26	-0.494288	0	-0.419286	0	-0.302856	0	-0.396545	0	-0.223485	0
-35.26	-0.302297	0	-0.201121	0	-0.302979	0	-0.369568	0	-0.215648	0
-34.26	-0.356031	0	-0.201708	0	-0.060791	0	-0.221069	0	-0.165087	0
-33.26	-0.303006	0	-0.271335	0	-0.189575	0	-0.226257	0	-0.182834	0
-32.26	0.00380933	0	0.0240227	0	0.183838	0	-0.0528564	0	-0.148341	0
-31.26	-0.166211	0	-0.0942868	0	0.0792236	0	-0.0891113	0	-0.112719	0
-30.26	-0.212379	0	-0.11245	0	0.0174561	0	-0.121338	0	-0.123193	0
-29.26	-0.205396	0	-0.108813	0	0.0286865	0	-0.0974121	0	-0.108691	0
-28.26	-0.164161	0	-0.0666739	0	0.0535889	0	-0.10083	0	-0.0926749	0
-27.26	-0.137183	0	-0.0644768	0	0.0697021	0	-0.071228	0	-0.0849847	0
-26.26	-0.160523	0	-0.0308831	0	0.0372314	0	-0.116516	0	-0.14685	0
-25.26	-0.0448726	0	0.0568355	0	0.111206	0	-0.0650635	0	-0.0437504	0
-24.26	-0.0903322	0	0.00183117	0	0.06604	0	-0.0474854	0	-0.0205077	0
-23.26	-0.0969976	0	-0.0127436	0	0.0789795	0	-0.0854492	0	-0.0137202	0
-22.26	-0.0645512	0	0.00034225	0	0.0910645	0	-0.069397	0	0.00400436	0
-21.26	-0.054468	0	-0.00668925	0	0.110596	0	-0.0570068	0	0.0134524	0
-20.26	-0.0686526	0	-0.0188718	0	0.0583496	0	-0.0662842	0	-0.0246091	0
-19.26	-0.0837163	0	-0.0161372	0	0.0305176	0	-0.0611572	0	-0.0272456	0
-18.26	-0.0700933	0	-0.0221918	0	0.0141602	0	-0.0476074	0	-0.00681096	0
-17.26	-0.0666997	0	-0.0270503	0	0.020752	0	-0.0497437	0	-0.00703073	0
-16.26	-0.0588385	0	-0.0263666	0	0.0125732	0	-0.0474854	0	-0.00830019	0
-15.26	-0.0441168	0	-0.0399897	0	0.0109863	0	-0.0458984	0	0.00468808	0
-14.26	-0.0238531	0	-0.0517084	0	0.019165	0	-0.0327148	0	0.00786188	0
-13.26	-0.0269536	0	-0.050439	0	0.00256348	0	-0.0287476	0	-0.0107661	0
-12.26	-0.0334966	0	-0.0410883	0	-0.0314941	0	-0.0339966	0	-0.0291254	0
-11.26	-0.0414313	0	-0.0261957	0	-0.0299072	0	-0.0476685	0	-0.0257074	0
-10.26	-0.0654302	0	-0.0264888	0	-0.00219727	0	-0.02948	0	-0.0357661	0
-9.26001	-0.102466	0	-0.0387689	0	-0.0184326	0	-0.0541382	0	-0.0479242	0
-8.26001	-0.0848151	0	-0.0383538	0	-0.0123291	0	-0.0736084	0	-0.0576409	0
-7.26001	-0.083399	0	-0.0383051	0	-0.000732422	0	-0.0718994	0	-0.0689448	0
-6.26001	-0.0757575	0	-0.0374017	0	0.000976563	0	-0.0579834	0	-0.0793939	0
-5.26001	-0.0586921	0	-0.0381096	0	0.0211182	0	-0.0580444	0	-0.0851067	0
-4.26001	-0.0568114	0	-0.0139894	0	0.050415	0	-0.057251	0	-0.0603761	0
-3.26001	-0.0270045	0	0.114041	0	0.0566406	0	0.111694	0	0.183254	0
-2.26001	-0.248757	0	-0.315085	0	-0.0450439	0	-0.349731	0	-0.391257	0
-1.26001	0.222848	0	0.228079	0	0.0473633	0	0.126953	0	0.196951	0
-0.26001	-1.18677	0	-0.57824	0	-0.246704	0	-0.440674	0	-0.173455	0
0.73999	14.155	11.56	9.11969	7.34463	0.911255	1.34853	1.73962	1.65163	0.286679	0.923174
1.73999	32.8829	26.3718	18.6576	14.8082	6.40356	5.20986	4.02185	3.55252	1.45526	1.87246
2.73999	50.9121	40.2844	28.5186	21.9235	11.8132	8.91857	6.88495	5.38461	3.05337	2.78902
3.73999	66.6807	53.3332	37.4407	28.7029	16.8242	12.4798	9.41864	7.15021	4.49883	3.67393
4.73999	80.5804	65.5546	45.5381	35.1589	21.587	15.8987	11.9211	8.85154	5.93633	4.52824
5.73999	92.7377	76.9855	52.8633	41.3035	25.9683	19.1801	14.2632	10.4908	7.22075	5.35296
6.73999	103.505	87.6627	59.4693	47.1489	29.9159	22.329	16.4288	12.07	8.4241	6.1491
7.73999	113.154	97.6235	65.5309	52.7069	33.585	25.3499	18.4613	13.5914	9.53997	6.9176
8.73999	121.579	106.905	71.0065	57.9891	37.0148	28.2475	20.2615	15.0568	10.5812	7.65939
9.73999	129.168	115.542	75.9718	63.007	40.1066	31.0263	21.9498	16.4681	11.5761	8.37536
10.74	135.913	123.573	80.4927	67.7717	42.964	33.6907	23.5547	17.8274	12.4303	9.06639
11.74	141.994	131.03	84.6862	72.294	45.6604	36.2448	25.0269	19.1363	13.2688	9.73333
12.74	147.495	137.949	88.5261	76.5846	48.1455	38.6929	26.408	20.3966	14.0222	10.377
13.74	152.459	144.361	92.127	80.6537	50.4248	41.0388	27.7423	21.6101	14.759	10.9981
14.74	156.942	150.3	95.3779	84.5114	52.603	43.2865	28.9849	22.7784	15.4591	11.5975
15.74	161.046	155.795	98.4219	88.1672	54.6467	45.4398	30.209	23.9031	16.1141	12.176
16.74	164.791	160.875	101.23	91.6307	56.5491	47.5023	31.2813	24.9857	16.7243	12.7341
17.74	168.172	165.568	103.886	94.9109	58.3745	49.4775	32.2995	26.0278	17.3184	13.2727
18.74	171.189	169.902	106.289	98.0164	59.9769	51.3689	33.2534	27.0308	17.8408	13.7924
19.74	174.016	173.899	108.572	100.956	61.5643	53.1797	34.1185	27.9961	18.4083	14.2938
20.74	176.728	177.586	110.67	103.737	63.0789	54.9132	35.0164	28.9251	18.9709	14.7776
21.74	179.147	180.983	112.654	106.368	64.5038	56.5725	35.9499	29.8191	19.4329	15.2443
22.74	181.349	184.112	114.543	108.856	65.7518	58.1605	36.8081	30.6793	19.9033	15.6946
23.74	183.43	186.993	116.251	111.209	67.0574	59.6801	37.5366	31.5071	20.3291	16.1291
24.74	185.326	189.644	117.872	113.433	68.2518	61.1342	38.2738	32.3034	20.7632	16.5482
25.74	187.161	192.082	119.423	115.534	69.4006	62.5253	39.039	33.0697	21.2181	16.9525
26.74	188.828	194.324	120.873	117.52	70.5428	63.8561	39.7429	33.8068	21.6538	17.3425
27.74	190.356	196.384	122.164	119.396	71.5999	65.129	40.3214	34.5159	22.0083	17.7188
28.74	191.84	198.278	123.374	121.167	72.5161	66.3465	40.8753	35.1981	22.2749	18.0817
29.74	193.142	200.017	124.58	122.841	73.4327	67.5109	41.4717	35.8543	22.6545	18.4319
30.74	194.341	201.614	125.663	124.42	74.2631	68.6243	42.0386	36.4854	22.9902	18.7696
31.74	195.47	203.08	126.667	125.911	75.0131	69.689	42.5134	37.0925	23.26	19.0953
32.74	196.546	204.426	127.652	127.319	75.7386	70.7069	42.97	37.6764	23.5142	19.4095
33.74	197.488	205.66	128.571	128.647	76.4623	71.6801	43.4554	38.238	23.8102	19.7126
34.74	198.43	206.793	129.468	129.9	77.1483	72.6104	43.9189	38.7781	24.1203	20.0049
35.74	199.343	207.832	130.231	131.083	77.8448	73.4997	44.374	39.2975	24.391	20.2869
36.74	200.146	208.785	131.017	132.198	78.4982	74.3498	44.7522	39.797	24.6232	20.5588
37.74	200.873	209.659	131.708	133.25	79.0978	75.1622	45.1099	40.2774	24.8354	20.8211
38.74	201.587	210.46	132.438	134.243	79.6237	75.9386	45.4957	40.7393	25.0684	21.074
39.74	202.263	211.194	133.145	135.179	80.1783	76.6806	45.8958	41.1834	25.3191	21.318
40.74	202.96	211.868	133.776	136.061	80.6631	77.3896	46.23	41.6105	25.5381	21.5532
41.74	203.567	212.484	134.367	136.893	81.1537	78.0672	46.5244	42.0211	25.7277	21.7801
42.74	204.117	213.05	134.912	137.677	81.6178	78.7145	46.8166	42.416	25.8914	21.999
43.74	204.646	213.568	135.407	138.417	82.0291	79.3331	47.1155	42.7956	26.0613	22.21
44.74	205.163	214.042	135.883	139.114	82.4495	79.924	47.3952	43.1606	26.2313	22.4135
45.74	205.626	214.477	136.373	139.771	82.84	80.4885	47.6673	43.5115	26.4159	22.6098
46.74	206.093	214.875	136.854	140.39	83.2585	81.0279	47.9437	43.8489	26.5757	22.7991
47.74	206.579	215.24	137.293	140.973	83.6306	81.5431	48.2031	44.1732	26.7465	22.9816
48.74	206.961	215.574	137.73	141.523	83.9624	82.0352	48.4622	44.485	26.9031	23.1576
49.74	207.398	215.88	138.138	142.041	84.3597	82.5053	48.7098	44.7848	27.0753	23.3274
50.74	207.778	216.161	138.504	142.529	84.6998	82.9543	48.9588	45.0729	27.1879	23.4911
51.74	208.126	216.417	138.869	142.989	84.9884	83.3831	49.1621	45.3499	27.2965	23.6489
52.74	208.481	216.652	139.26	143.423	85.2107	83.7927	49.3698	45.6162	27.4066	23.8011
53.74	208.849	216.868	139.556	143.831	85.5363	84.1839	49.5718	45.8722	27.549	23.9479
54.74	209.199	217.065	139.883	144.216	85.8156	84.5575	49.7717	46.1182	27.6578	24.0894
55.74	209.483	217.245	140.2	144.578	86.0807	84.9143	49.9622	46.3548	27.758	24.2259
56.74	209.739	217.411	140.507	144.919	86.3287	85.255	50.1573	46.5821	27.8628	24.3575
57.74	210.051	217.562	140.792	145.241	86.548	85.5804	50.3414	46.8006	27.9656	24.4844
58.74	210.364	217.7	141.077	145.544	86.7975	85.8911	50.5002	47.0107	28.0749	24.6067
59.74	210.63	217.827	141.368	145.829	87.0588	86.1877	50.6647	47.2126	28.1613	24.7247
60.74	210.878	217.943	141.597	146.098	87.2534	86.471	50.8486	47.4066	28.2412	24.8385
61.74	211.144	218.05	141.851	146.351	87.4479	86.7416	50.9925	47.5932	28.3484	24.9482
62.74	211.406	218.147	142.099	146.589	87.6737	86.9998	51.1749	47.7724	28.4702	25.0539
63.74	211.687	218.236	142.38	146.813	87.8809	87.2465	51.3334	47.9447	28.5968	25.1559
64.74	211.945	218.318	142.658	147.025	88.1135	87.4819	51.4703	48.1103	28.68	25.2543
65.74	212.108	218.392	142.869	147.224	88.2959	87.7068	51.6288	48.2695	28.7553	25.3491
66.74	212.246	218.461	143.034	147.411	88.4315	87.9214	51.7414	48.4225	28.8169	25.4405
67.74	212.363	218.523	143.154	147.588	88.5789	88.1264	51.8282	48.5695	28.8635	25.5286
68.74	212.474	218.581	143.263	147.754	88.6772	88.322	51.9283	48.7108	28.9125	25.6136
69.74	212.558	218.633	143.373	147.91	88.8308	88.5088	52.0159	48.8466	28.949	25.6956
70.74	212.654	218.681	143.485	148.058	88.9757	88.6872	52.1037	48.9771	29.0088	25.7746
71.74	212.764	218.725	143.627	148.197	89.0986	88.8574	52.2057	49.1026	29.0432	25.8508
72.74	212.877	218.765	143.767	148.327	89.2241	89.02	52.3001	49.2231	29.1047	25.9242
73.74	212.98	218.802	143.903	148.45	89.3269	89.1752	52.4001	49.339	29.1667	25.9951
74.74	213.08	218.836	144.017	148.566	89.4125	89.3233	52.4902	49.4503	29.2236	26.0633
75.74	213.172	218.867	144.144	148.675	89.4858	89.4647	52.561	49.5573	29.2835	26.1292
76.74	213.277	218.895	144.271	148.778	89.5691	89.5997	52.6495	49.6601	29.3519	26.1927
77.74	213.386	218.921	144.381	148.875	89.6741	89.7286	52.7286	49.7589	29.41	26.2539
78.74	213.49	218.944	144.504	148.966	89.7863	89.8516	52.8126	49.8539	29.4655	26.3129
79.74	213.593	218.966	144.613	149.051	89.9058	89.969	52.887	49.9452	29.5211	26.3697
80.74	213.698	218.986	144.718	149.132	89.9976	90.0811	52.9612	50.0329	29.5548	26.4246
81.74	213.805	219.004	144.818	149.208	90.0968	90.1882	53.0306	50.1171	29.6116	26.4775
82.74	213.925	219.021	144.908	149.28	90.1866	90.2903	53.0951	50.1981	29.6365	26.5285
83.74	214.013	219.036	144.991	149.347	90.3047	90.3878	53.1503	50.276	29.6598	26.5776
84.74	214.121	219.05	145.079	149.411	90.4222	90.4809	53.2083	50.3508	29.6958	26.625
85.74	214.222	219.063	145.193	149.47	90.5234	90.5697	53.2431	50.4226	29.7289	26.6707
86.74	214.345	219.074	145.318	149.527	90.5952	90.6545	53.3152	50.4917	29.7876	26.7148
87.74	214.47	219.085	145.435	149.579	90.6738	90.7355	53.3781	50.5581	29.8095	26.7572
88.74	214.581	219.095	145.543	149.629	90.7637	90.8128	53.4239	50.6219	29.836	26.7982
89.74	214.68	219.104	145.641	149.676	90.8418	90.8865	53.4741	50.6831	29.8538	26.8377
90.74	214.783	219.112	145.724	149.72	90.9154	90.9569	53.5154	50.742	29.8732	26.8757
91.74	214.886	219.119	145.818	149.762	91.0042	91.0241	53.5616	50.7986	29.8897	26.9124
92.74	214.995	219.126	145.914	149.801	91.0822	91.0883	53.6053	50.853	29.9042	26.9478
93.74	215.112	219.132	146.003	149.838	91.1693	91.1495	53.6533	50.9053	29.9184	26.9819
94.74	215.245	219.138	146.098	149.873	91.269	91.2079	53.6852	50.9555	29.934	27.0148
95.74	215.347	219.143	146.19	149.905	91.3419	91.2637	53.7244	51.0038	29.942	27.0465
96.74	215.465	219.148	146.279	149.936	91.4093	91.317	53.7609	51.0501	29.9623	27.0771
97.74	215.568	219.153	146.371	149.965	91.4677	91.3678	53.7858	51.0947	29.9919	27.1066
98.74	215.668	219.157	146.46	149.992	91.5465	91.4163	53.8122	51.1375	30.0212	27.135
99.74	215.754	219.16	146.535	150.018	91.6332	91.4626	53.8389	51.1787	30.0277	27.1624
100.74	215.843	219.164	146.605	150.042	91.6802	91.5068	53.87	51.2182	30.0374	27.1888
101.74	215.932	219.167	146.686	150.065	91.7493	91.5489	53.8987	51.2562	30.0495	27.2143
102.74	216.03	219.17	146.763	150.086	91.8079	91.5892	53.9279	51.2927	30.0478	27.2388
103.74	216.124	219.172	146.833	150.106	91.8567	91.6276	53.9752	51.3278	30.0704	27.2625
104.74	216.211	219.175	146.894	150.125	91.9095	91.6643	54.0088	51.3615	30.0845	27.2853
105.74	216.296	219.177	146.944	150.143	91.9469	91.6993	54.0447	51.3939	30.1028	27.3073
106.74	216.38	219.179	147.006	150.16	91.9943	91.7327	54.0831	51.425	30.1473	27.3285
107.74	216.451	219.181	147.068	150.176	92.0548	91.7646	54.1038	51.4549	30.153	27.3489
108.74	216.536	219.182	147.14	150.191	92.1056	91.795	54.1477	51.4836	30.1686	27.3686
109.74	216.604	219.184	147.199	150.205	92.1743	91.8241	54.1579	51.5113	30.1921	27.3876
110.74	216.666	219.185	147.257	150.218	92.2332	91.8518	54.1642	51.5378	30.1934	27.406
111.74	216.732	219.187	147.316	150.231	92.2653	91.8783	54.1924	51.5633	30.2205	27.4236
112.74	216.808	219.188	147.373	150.242	92.3212	91.9035	54.2172	51.5878	30.2279	27.4407
113.74	216.873	219.189	147.417	150.253	92.3719	91.9276	54.2507	51.6113	30.2332	27.4571
114.74	216.957	219.19	147.458	150.264	92.411	91.9506	54.2554	51.634	30.2331	27.4729
115.74	217.028	219.191	147.507	150.273	92.4408	91.9726	54.2826	51.6557	30.2419	27.4882
116.74	217.099	219.191	147.534	150.283	92.4785	91.9935	54.3115	51.6766	30.2374	27.5029
117.74	217.15	219.192	147.536	150.291	92.5157	92.0135	54.3317	51.6966	30.2195	27.5171
118.74	217.129	219.193	147.533	150.299	92.4847	92.0326	54.2664	51.7159	30.1383	27.5307
119.74	217.273	219.194	147.422	150.307	92.5699	92.0509	53.4417	51.7345	29.4662	27.5439
120.74	212.102	212.75	142.142	145.609	91.2007	90.9436	53.6462	50.426	30.1811	26.7691
121.74	201.453	204.402	135.717	140.229	86.627	87.7372	50.6896	48.7063	28.3308	25.8733
122.74	191.331	196.442	129.183	135.073	82.9835	84.6521	48.3602	47.0476	27.0917	25.0082
123.74	182.07	188.848	123.077	130.129	79.1565	81.6831	46.1824	45.4475	25.9659	24.1725
124.74	173.421	181.598	117.489	125.386	75.5723	78.8253	44.2093	43.9039	24.8867	23.3653
125.74	165.33	174.672	112.301	120.834	72.2859	76.0739	42.3885	42.4145	23.8546	22.5856
126.74	157.872	168.051	107.398	116.465	69.2291	73.4247	40.6564	40.9774	22.9658	21.8324
127.74	150.949	161.718	102.794	112.269	66.3085	70.8733	38.9982	39.5906	22.1219	21.1047
128.74	144.459	155.659	98.5482	108.239	63.6439	68.4157	37.4738	38.2522	21.3255	20.4016
129.74	138.327	149.857	94.5726	104.367	61.1208	66.0481	36.0347	36.9604	20.5183	19.7224
130.74	132.578	144.301	90.7965	100.645	58.7057	63.7669	34.675	35.7135	19.8125	19.0661
131.74	127.185	138.976	87.2299	97.0678	56.5148	61.5685	33.4257	34.51	19.1431	18.432
132.74	122.146	133.871	83.892	93.6279	54.4197	59.4498	32.2219	33.348	18.4375	17.8193
133.74	117.4	128.976	80.7356	90.3194	52.4326	57.4075	31.1031	32.2263	17.8039	17.2272
134.74	112.877	124.279	77.6603	87.1366	50.4817	55.4387	29.9801	31.1433	17.2188	16.6551
135.74	108.603	119.772	74.8579	84.0741	48.6826	53.5404	28.9828	30.0975	16.6594	16.1022
136.74	104.531	115.445	72.2399	81.1268	46.98	51.7099	28.0083	29.0877	16.1188	15.568
137.74	100.681	111.29	69.7018	78.2898	45.3611	49.9446	27.0842	28.1126	15.6316	15.0516
138.74	97.0817	107.298	67.2789	75.5584	43.8889	48.2421	26.2208	27.1709	15.2071	14.5526
139.74	93.6544	103.463	64.9607	72.9282	42.4377	46.5998	25.3455	26.2614	14.7076	14.0703
140.74	90.3379	99.7764	62.7543	70.395	40.9634	45.0155	24.5375	25.383	14.2561	13.6042
141.74	87.2092	96.2324	60.6868	67.955	39.6356	43.4871	23.8044	24.5346	13.852	13.1537
142.74	84.2101	92.8245	58.6948	65.6042	38.3868	42.0123	23.0324	23.7151	13.4594	12.7183
143.74	81.3989	89.5466	56.8112	63.3392	37.2482	40.5893	22.3502	22.9234	13.0858	12.2974
144.74	78.6956	86.3931	55.0407	61.1563	36.0896	39.216	21.6913	22.1587	12.7564	11.8906
145.74	76.1464	83.3586	53.3139	59.0525	34.9998	37.8907	21.1186	21.42	12.3968	11.4974
146.74	73.6469	80.4381	51.6588	57.0245	33.9618	36.6115	20.4892	20.7062	12.0808	11.1172
147.74	71.3424	77.6267	50.0766	55.0694	32.9701	35.3768	19.9256	20.0167	11.7958	10.7498
148.74	69.1213	74.9199	48.5707	53.1843	32.0131	34.1848	19.3715	19.3505	11.4414	10.3946
149.74	66.9904	72.3134	47.1196	51.3666	31.0697	33.0342	18.7833	18.7068	11.0903	10.0513
150.74	64.9292	69.8029	45.7348	49.6135	30.1841	31.9233	18.3106	18.0848	10.7806	9.71934
151.74	62.9818	67.3845	44.4123	47.9227	29.3853	30.8507	17.8715	17.4838	10.5379	9.39846
152.74	61.1004	65.0546	43.1857	46.2917	28.5677	29.815	17.4175	16.903	10.3232	9.08825
153.74	59.3207	62.8095	41.9673	44.7183	27.802	28.8149	16.9885	16.3418	10.0475	8.78835
154.74	57.6091	60.6459	40.7949	43.2003	27.0209	27.8491	16.5507	15.7995	9.78213	8.49842
155.74	55.9536	58.5605	39.686	41.7356	26.3314	26.9165	16.1666	15.2754	9.57004	8.21812
156.74	54.3911	56.5502	38.624	40.3223	25.6892	26.0157	15.7808	14.7689	9.35767	7.94712
157.74	52.8954	54.6121	37.5511	38.9583	24.9946	25.1457	15.3985	14.2793	9.15269	7.68511
158.74	51.4559	52.7433	36.5851	37.642	24.3853	24.3053	15.0328	13.8062	8.92861	7.4318
159.74	50.0765	50.9413	35.7014	36.3714	23.8262	23.4936	14.6838	13.3489	8.72285	7.18688
160.74	48.7669	49.2033	34.7531	35.145	23.2185	22.7095	14.3461	12.907	8.54402	6.95008
161.74	47.5082	47.527	33.9068	33.9611	22.6235	21.9521	14.0266	12.4798	8.35798	6.72112
162.74	46.2738	45.91	33.0939	32.8182	22.1169	21.2203	13.7557	12.0669	8.18411	6.49974
163.74	45.1345	44.3501	32.2659	31.7147	21.6024	20.5133	13.4647	11.6678	8.01248	6.2857
164.74	43.9303	42.8451	31.5368	30.6493	21.0907	19.8303	13.1437	11.282	7.86738	6.07874
165.74	42.8077	41.3928	30.795	29.6206	20.6235	19.1704	12.85	10.909	7.73657	5.87862
166.74	41.7804	39.9915	30.0834	28.6272	20.1938	18.5328	12.5955	10.5485	7.6084	5.68512
167.74	40.7413	38.6391	29.3875	27.6678	19.7869	17.9167	12.3412	10.2001	7.46626	5.49802
168.74	39.8086	37.3339	28.719	26.7414	19.3672	17.3213	12.1093	9.86318	7.32742	5.31711
169.74	38.8798	36.074	28.1136	25.8466	18.965	16.746	11.8854	9.53752	7.22043	5.14217
170.74	37.9972	34.8579	27.506	24.9823	18.6056	16.1901	11.6578	9.22268	7.11389	4.97301
171.74	37.1144	33.684	26.9195	24.1476	18.2137	15.6529	11.423	8.91832	7.01936	4.80944
172.74	36.2715	32.5506	26.3841	23.3412	17.8556	15.1337	11.2188	8.62407	6.90371	4.65126
173.74	35.4883	31.4564	25.8436	22.5623	17.4998	14.6319	11.0164	8.33959	6.77695	4.49831
174.74	34.705	30.3999	25.3388	21.8098	17.194	14.147	10.798	8.06456	6.65288	4.35041
175.74	33.9181	29.3797	24.8168	21.0829	16.8656	13.6783	10.5842	7.79866	6.54243	4.20738
176.74	33.1778	28.3946	24.3148	20.3806	16.5403	13.2253	10.3993	7.54158	6.42129	4.06907
177.74	32.496	27.4432	23.8271	19.7021	16.2378	12.7875	10.2261	7.29302	6.32258	3.93533
178.74	31.8211	26.5244	23.3522	19.0465	15.9181	12.3643	10.0591	7.0527	6.21218	3.80599
179.74	31.1949	25.637	22.8804	18.413	15.606	11.9552	9.91437	6.82034	6.08833	3.68092
180.74	30.5355	24.7799	22.4737	17.801	15.2933	11.5599	9.75818	6.59568	5.99228	3.55997
181.74	29.9066	23.9521	22.0811	17.2095	15.042	11.1777	9.60443	6.37846	5.91021	3.443
182.74	29.3341	23.1524	21.6814	16.638	14.7869	10.8082	9.4588	6.16843	5.82756	3.32989
183.74	28.8	22.3799	21.3203	16.0857	14.568	10.4511	9.33472	5.96535	5.75364	3.2205
184.74	28.2904	21.6336	20.9511	15.552	14.3556	10.1058	9.19989	5.76898	5.68328	3.11472
185.74	27.7793	20.9126	20.5847	15.0362	14.1384	9.7721	9.08893	5.57911	5.62436	3.01242
186.74	27.2937	20.2161	20.2598	14.5377	13.9392	9.44947	8.95923	5.39551	5.57061	2.91348
187.74	26.766	19.5431	19.9388	14.0559	13.715	9.13756	8.82739	5.21798	5.53071	2.81781
188.74	26.2827	18.8929	19.5973	13.5903	13.4978	8.83603	8.69415	5.04632	5.49634	2.72528
189.74	25.7964	18.2647	19.2752	13.1402	13.2773	8.54451	8.58807	4.88033	5.42893	2.6358
190.74	25.3313	17.6576	18.9717	12.7053	13.0582	8.26268	8.46234	4.71981	5.34463	2.54926
191.74	24.8728	17.071	18.6703	12.2848	12.8473	7.9902	8.36169	4.5646	5.24744	2.46556
192.74	24.4647	16.5041	18.3583	11.8784	12.6692	7.72676	8.22827	4.41451	5.17112	2.38462
193.74	24.0451	15.9563	18.075	11.4856	12.4912	7.47207	8.11652	4.26937	5.09319	2.30635
194.74	23.6532	15.427	17.7876	11.1059	12.3016	7.22581	8.01495	4.12902	5.03149	2.23064
195.74	23.2929	14.9154	17.5102	10.7388	12.1172	6.98772	7.92517	3.99329	4.98262	2.15743
196.74	22.9447	14.4209	17.2606	10.384	11.9502	6.75752	7.83472	3.86205	4.94092	2.08662
197.74	22.586	13.9431	17.0149	10.041	11.797	6.53494	7.74805	3.73513	4.91379	2.01814
198.74	22.2394	13.4812	16.7653	9.70941	11.6467	6.31973	7.67792	3.61239	4.87519	1.95192
199.74	21.9242	13.0348	16.5183	9.38886	11.4899	6.11164	7.60742	3.49369	4.83572	1.88786
200.74	21.5968	12.6033	16.3062	9.07897	11.3721	5.91043	7.5531	3.37891	4.80984	1.82592
201.74	21.2929	12.1863	16.1461	8.77938	11.264	5.71588	7.51068	3.26791	4.75759	1.76601
202.74	21.0097	11.7832	15.9864	8.48975	11.145	5.52777	7.44244	3.16057	4.72207	1.70806
203.74	20.7217	11.3936	15.8184	8.20973	11.0431	5.34587	7.38043	3.05675	4.69002	1.65203
204.74	20.4094	11.0169	15.6345	7.93901	10.929	5.16998	7.31848	2.95636	4.67566	1.59783
205.74	20.1283	10.6528	15.4233	7.67728	10.8184	4.9999	7.25635	2.85927	4.65405	1.54541
206.74	19.8834	10.3009	15.2215	7.42422	10.7048	4.83544	7.18396	2.76538	4.6092	1.49471
207.74	19.6373	9.96063	15.0679	7.17955	10.6169	4.67641	7.12573	2.67458	4.55842	1.44568
208.74	19.3759	9.63172	14.9008	6.94299	10.498	4.52263	7.05701	2.58676	4.51897	1.39826
209.74	19.1291	9.31375	14.729	6.71427	10.4172	4.37392	7.00952	2.50184	4.48616	1.3524
210.74	18.9297	9.00636	14.5451	6.49312	10.3375	4.23012	6.95953	2.4197	4.44578	1.30804
211.74	18.6819	8.70919	14.3893	6.2793	10.2574	4.09106	6.9101	2.34027	4.42893	1.26514
212.74	18.4363	8.42188	14.2311	6.07255	10.1708	3.95659	6.86383	2.26346	4.39334	1.22365
213.74	18.2305	8.14412	14.0689	5.87263	10.0598	3.82655	6.80853	2.18916	4.3585	1.18351
214.74	18.0369	7.87558	13.9406	5.67933	9.98755	3.7008	6.75586	2.11731	4.3249	1.1447
215.74	17.8023	7.61595	13.8097	5.49243	9.91101	3.5792	6.7002	2.04782	4.29741	1.10716
216.74	17.5428	7.36492	13.684	5.31169	9.82007	3.4616	6.6297	1.98062	4.27446	1.07085
217.74	17.3406	7.12222	13.5377	5.13694	9.72156	3.34787	6.55072	1.91563	4.23752	1.03574
218.74	17.1734	6.88756	13.4128	4.96795	9.63171	3.23789	6.47522	1.85277	4.21067	1.00178
219.74	17.0111	6.66067	13.2645	4.80454	9.5321	3.13154	6.40839	1.79197	4.16541	0.968927
220.74	16.8121	6.4413	13.1365	4.64653	9.42273	3.02868	6.34039	1.73318	4.1188	0.937156
221.74	16.63	6.22919	13.0194	4.49374	9.32263	2.92921	6.29486	1.67631	4.08201	0.906428
222.74	16.4397	6.0241	12.8997	4.34598	9.21167	2.83302	6.2547	1.62132	4.06982	0.876708
223.74	16.2954	5.82579	12.7834	4.2031	9.11023	2.73999	6.21277	1.56813	4.04685	0.847963
224.74	16.1321	5.63404	12.6809	4.06494	9.01379	2.65002	6.1781	1.51669	4.02449	0.820162
225.74	15.9772	5.44863	12.5594	3.93133	8.9375	2.56302	6.14294	1.46693	4.00806	0.793272
226.74	15.8062	5.26934	12.4577	3.80212	8.85547	2.47887	6.12231	1.41881	3.98923	0.767264
227.74	15.6486	5.09598	12.3736	3.67718	8.8114	2.39749	6.08679	1.37228	3.97261	0.74211
228.74	15.5235	4.92835	12.278	3.55635	8.77087	2.31879	6.04211	1.32727	3.93862	0.717781
229.74	15.3672	4.76625	12.1683	3.4395	8.72351	2.24268	6.00122	1.28373	3.89731	0.69425
230.74	15.1998	4.6095	12.056	3.32651	8.65796	2.16907	5.94025	1.24163	3.84563	0.67149
231.74	15.028	4.45793	11.9503	3.21723	8.58752	2.09788	5.88525	1.20091	3.80198	0.649478
232.74	14.885	4.31136	11.8473	3.11155	8.54663	2.02903	5.84174	1.16152	3.77441	0.628187
233.74	14.7664	4.16962	11.7476	3.00936	8.48132	1.96245	5.79285	1.12343	3.74614	0.607594
234.74	14.6342	4.03256	11.6642	2.91052	8.43103	1.89805	5.75903	1.08659	3.72498	0.587677
235.74	14.4909	3.90002	11.5933	2.81494	8.37	1.83577	5.71484	1.05096	3.7001	0.568413
236.74	14.3462	3.77184	11.5175	2.72251	8.32935	1.77553	5.68359	1.0165	3.69783	0.549781
237.74	14.2025	3.6479	11.4387	2.63312	8.26404	1.71728	5.64294	0.983164	3.69592	0.53176
238.74	14.0292	3.52803	11.3241	2.54667	8.20508	1.66094	5.60419	0.950926	3.6793	0.51433
239.74	13.8698	3.41212	11.2205	2.46306	8.11841	1.60644	5.52002	0.919746	3.6458	0.497471
					8.02197	1.55374

## Sheet: biotin-C3d ISG65
Cycle: 1 ISG65WT 5000 nM_X	Cycle: 1 ISG65WT 5000 nM_Y	Fitted Cycle: 1 ISG65WT 5000 n_Y	Cycle: 2 ISG65WT 2500 nM_Y	Fitted Cycle: 2 ISG65WT 2500 n_Y	Cycle: 3 ISG65WT 1250 nM_Y	Fitted Cycle: 3 ISG65WT 1250 n_Y	Cycle: 4 ISG65WT 625 nM_Y	Fitted Cycle: 4 ISG65WT 625 nM_Y	Cycle: 5 ISG65WT 312.5 nM_Y	Fitted Cycle: 5 ISG65WT 312.5 _Y
-59.56	0.643631	0	0.0949707	0	-0.210205	0	-0.305099	0	-0.351624	0
-58.56	0.645584	0	0.0949707	0	-0.229736	0	-0.295334	0	-0.361389	0
-57.56	0.645584	0	0.083252	0	-0.239502	0	-0.314865	0	-0.361389	0
-56.56	0.635818	0	0.0930176	0	-0.241455	0	-0.314865	0	-0.351624	0
-55.56	0.629959	0	0.0979004	0	-0.253174	0	-0.305099	0	-0.348694	0
-54.56	0.628006	0	0.107666	0	-0.243408	0	-0.305099	0	-0.329163	0
-53.56	0.64949	0	0.12915	0	-0.223877	0	-0.312912	0	-0.309632	0
-52.56	0.646365	0	0.128174	0	-0.22544	0	-0.313303	0	-0.309827	0
-51.56	0.667068	0	0.136963	0	-0.227783	0	-0.324631	0	-0.311585	0
-50.56	0.672146	0	0.140869	0	-0.218408	0	-0.312521	0	-0.302601	0
-49.56	0.702225	0	0.16333	0	-0.212158	0	-0.307053	0	-0.273499	0
-48.56	0.708084	0	0.168213	0	-0.204346	0	-0.314865	0	-0.282288	0
-47.56	0.71199	0	0.182861	0	-0.214111	0	-0.297287	0	-0.29303	0
-46.56	0.71199	0	0.182861	0	-0.214111	0	-0.287521	0	-0.291077	0
-45.56	0.719021	0	0.188721	0	-0.204736	0	-0.285177	0	-0.321155	0
-44.56	0.71785	0	0.179932	0	-0.210205	0	-0.277756	0	-0.331115	0
-43.56	0.719803	0	0.189697	0	-0.214111	0	-0.293381	0	-0.348694	0
-42.56	0.745193	0	0.192627	0	-0.186768	0	-0.271896	0	-0.339905	0
-41.56	0.758865	0	0.207275	0	-0.175049	0	-0.273849	0	-0.350647	0
-40.56	0.758865	0	0.207275	0	-0.175049	0	-0.283615	0	-0.340882	0
-39.56	0.768631	0	0.248291	0	-0.175049	0	-0.275802	0	-0.331116	0
-38.56	0.82449	0	0.229736	0	-0.202783	0	-0.294943	0	-0.319202	0
-37.56	0.950197	0	0.23056	0	-0.112235	0	-0.338693	0	-0.316664	0
-36.56	1.15711	0	0.775505	0	0.623761	0	-0.293759	0	-0.317672	0
-35.56	0.727238	0	0.400024	0	0.0791723	0	0.354589	0	0.310933	0
-34.56	0.221731	0	-0.0223312	0	-0.330213	0	-0.125323	0	-0.00465602	0
-33.56	-0.402664	0	-0.812027	0	-0.900658	0	-0.449883	0	-0.406616	0
-32.56	-0.17111	0	-0.605583	0	-0.685187	0	-0.87597	0	-0.634558	0
-31.56	0.00173402	0	-0.38147	0	-0.423144	0	-0.569196	0	-0.628393	0
-30.56	-0.0692417	0	-0.409981	0	-0.574851	0	-0.428903	0	-0.306783	0
-29.56	-0.152726	0	-0.527733	0	-0.638107	0	-0.622589	0	-0.519982	0
-28.56	-0.118565	0	-0.464912	0	-0.586466	0	-0.60111	0	-0.52026	0
-27.56	-0.109147	0	-0.403503	0	-0.551834	0	-0.539261	0	-0.479828	0
-26.56	-0.0731672	0	-0.402031	0	-0.508408	0	-0.538925	0	-0.447687	0
-25.56	0.0435341	0	-0.226555	0	-0.392707	0	-0.480233	0	-0.444251	0
-24.56	-0.0331052	0	-0.208389	0	-0.351842	0	-0.372661	0	-0.386255	0
-23.56	-0.072705	0	-0.276627	0	-0.368445	0	-0.387704	0	-0.327603	0
-22.56	-0.0493248	0	-0.236847	0	-0.33012	0	-0.348056	0	-0.292809	0
-21.56	-0.0453572	0	-0.204239	0	-0.298657	0	-0.312351	0	-0.261391	0
-20.56	-0.0558736	0	-0.172272	0	-0.249822	0	-0.271067	0	-0.220165	0
-19.56	-0.0497581	0	-0.13887	0	-0.215759	0	-0.231812	0	-0.209701	0
-18.56	-0.0469507	0	-0.104675	0	-0.17865	0	-0.20102	0	-0.192626	0
-17.56	-0.0426211	0	-0.0761414	0	-0.137567	0	-0.151114	0	-0.148029	0
-16.56	-0.0114594	0	-0.0506592	0	-0.114105	0	-0.105881	0	-0.10318	0
-15.56	-0.0141904	0	-0.0638123	0	-0.105835	0	-0.0801088	0	-0.104156	0
-14.56	-0.0224547	0	-0.0546417	0	-0.0998962	0	-0.0775178	0	-0.0742888	0
-13.56	-0.00129097	0	-0.053772	0	-0.0787171	0	-0.0657989	0	-0.0583436	0
-12.56	0.00198642	0	-0.0317841	0	-0.0425477	0	-0.039865	0	-0.0446444	0
-11.56	0.00581336	0	-0.0262451	0	-0.021454	0	-0.0285491	0	-0.0237124	0
-10.56	0.00777882	0	-0.0140076	0	0.0107482	0	-0.0118926	0	0.0129821	0
-9.56	0.0144468	0	0.00401306	0	0.033026	0	0.0102784	0	0.0183683	0
-8.56	0.00627137	0	0.00811768	0	0.0524597	0	0.0214081	0	0.0276489	0
-7.56	-0.00699808	0	0.0164642	0	0.0576048	0	0.0165529	0	0.0289211	0
-6.56	0.0119229	0	0.0399628	0	0.0790892	0	0.0389681	0	0.0369778	0
-5.56	0.0154201	0	0.0661316	0	0.101422	0	0.071155	0	0.0373775	0
-4.56	0.00540511	0	0.0777588	0	0.103479	0	0.0780546	0	0.0453679	0
-3.56	-0.045457	0	0.0271606	0	0.0488047	0	0.061257	0	0.0473469	0
-2.56	0.0161735	0	0.091095	0	0.167717	0	-0.0154338	0	0.0784446	0
-1.56	0.184206	0	0.207436	0	0.248002	0	0.185744	0	0.0535986	0
-0.559998	-1.15853	0	0.583656	0	-0.606325	0	0.559847	0	0.330143	0
0.440002	9.59639	7.45866	1.61732	2.94155	2.90353	2.71313	-0.518976	0	-0.604893	0
1.44	24.4779	21.73	10.7728	10.5649	6.38341	6.41768	1.58387	2.07169	0.418109	0.980916
2.44	35.9016	32.9366	17.8635	16.8646	10.1798	9.55808	3.68662	3.85043	1.45628	1.88667
3.44	43.9047	41.7366	23.3605	22.0703	13.118	12.2202	5.47751	5.37765	2.41035	2.66932
4.44	49.7773	48.6468	27.6278	26.3722	15.5942	14.477	6.99074	6.68892	3.20019	3.34561
5.44	54.209	54.0731	30.9021	29.9271	17.5216	16.3901	8.30633	7.81477	3.99775	3.92997
6.44	57.5976	58.3341	33.5026	32.8647	19.1728	18.0118	9.42537	8.78142	4.66936	4.43492
7.44	60.2063	61.6801	35.5553	35.2922	20.4271	19.3866	10.3501	9.61139	5.20795	4.87124
8.44	62.2701	64.3075	37.2081	37.2982	21.4732	20.552	11.092	10.324	5.61058	5.24826
9.44	63.9495	66.3707	38.6278	38.9559	22.3774	21.5399	11.7139	10.9358	5.99638	5.57404
10.44	65.3316	67.9908	39.7408	40.3257	23.1172	22.3774	12.1556	11.4612	6.28898	5.85555
11.44	66.4249	69.263	40.63	41.4577	23.7058	23.0874	12.6057	11.9122	6.52064	6.09879
12.44	67.334	70.262	41.3369	42.3931	24.1855	23.6892	13.0294	12.2995	6.71296	6.30898
13.44	68.0854	71.0465	41.9783	43.1661	24.6454	24.1994	13.2489	12.632	6.83734	6.4906
14.44	68.7521	71.6625	42.5525	43.8049	25.0057	24.6319	13.4578	12.9174	6.99664	6.64754
15.44	69.2872	72.1462	43.0021	44.3327	25.2774	24.9985	13.7304	13.1626	7.14929	6.78315
16.44	69.7721	72.5261	43.3836	44.7689	25.5374	25.3093	13.826	13.373	7.21479	6.90032
17.44	70.2283	72.8243	43.6988	45.1294	25.8009	25.5728	14.0117	13.5537	7.3136	7.00157
18.44	70.5403	73.0586	43.9841	45.4273	25.9878	25.7961	14.1599	13.7089	7.41529	7.08906
19.44	70.8676	73.2425	44.2111	45.6734	26.1212	25.9854	14.2734	13.8421	7.51364	7.16466
20.44	71.1796	73.3869	44.4261	45.8768	26.269	26.1459	14.3773	13.9564	7.60902	7.22998
21.44	71.4071	73.5003	44.6283	46.0449	26.3751	26.282	14.4812	14.0546	7.63235	7.28643
22.44	71.6159	73.5894	44.8135	46.1838	26.5058	26.3973	14.6043	14.139	7.63497	7.3352
23.44	71.8218	73.6593	44.9614	46.2986	26.6136	26.4951	14.6812	14.2113	7.68844	7.37735
24.44	72.0211	73.7142	45.0893	46.3934	26.7024	26.578	14.7422	14.2735	7.74151	7.41376
25.44	72.2244	73.7574	45.251	46.4718	26.7599	26.6483	14.82	14.3269	7.78279	7.44523
26.44	72.4076	73.7912	45.3556	46.5366	26.8318	26.7078	14.8768	14.3727	7.83664	7.47242
27.44	72.5189	73.8178	45.4379	46.5901	26.9131	26.7583	14.8856	14.412	7.88854	7.49592
28.44	72.6384	73.8387	45.5134	46.6343	26.9474	26.8011	14.8958	14.4458	7.88069	7.51622
29.44	72.7717	73.8551	45.5493	46.6709	26.9338	26.8374	14.924	14.4748	7.8867	7.53376
30.44	72.9248	73.8679	45.5924	46.7011	26.9706	26.8681	14.9611	14.4997	7.91138	7.54892
31.44	73.0592	73.8781	45.6745	46.726	27.0426	26.8942	15.0314	14.5211	7.98853	7.56202
32.44	73.1255	73.886	45.7365	46.7467	27.0889	26.9163	15.047	14.5394	8.03693	7.57334
33.44	73.1843	73.8922	45.8025	46.7637	27.1042	26.9351	15.043	14.5552	8.01254	7.58311
34.44	73.2435	73.8971	45.8518	46.7778	27.1231	26.9509	15.0651	14.5687	8.00857	7.59157
35.44	73.3409	73.901	45.8822	46.7894	27.1278	26.9644	15.0783	14.5803	7.98243	7.59887
36.44	73.4516	73.904	45.9153	46.7991	27.1609	26.9758	15.1168	14.5903	7.99428	7.60518
37.44	73.5066	73.9064	45.955	46.807	27.1509	26.9855	15.1627	14.5989	8.01862	7.61063
38.44	73.5227	73.9082	45.9961	46.8136	27.1584	26.9937	15.162	14.6062	8.02493	7.61534
39.44	73.6075	73.9097	46.0379	46.819	27.2054	27.0006	15.1277	14.6126	8.01601	7.61941
40.44	73.6774	73.9108	46.1076	46.8235	27.2476	27.0065	15.1297	14.618	8.0423	7.62293
41.44	73.7631	73.9117	46.1377	46.8272	27.2516	27.0115	15.1362	14.6226	8.05222	7.62597
42.44	73.8551	73.9124	46.1665	46.8302	27.2558	27.0158	15.1319	14.6266	8.05191	7.62859
43.44	73.9393	73.913	46.2035	46.8328	27.2687	27.0194	15.1452	14.6301	8.06347	7.63086
44.44	74.0241	73.9134	46.2301	46.8349	27.2848	27.0224	15.1565	14.633	8.06564	7.63282
45.44	74.0873	73.9138	46.2744	46.8366	27.3205	27.025	15.1766	14.6355	8.09418	7.63452
46.44	74.1655	73.914	46.315	46.838	27.3301	27.0272	15.1929	14.6377	8.11905	7.63598
47.44	74.2746	73.9142	46.3564	46.8392	27.339	27.029	15.1922	14.6396	8.13082	7.63725
48.44	74.3638	73.9144	46.3779	46.8402	27.3509	27.0306	15.1934	14.6412	8.14122	7.63834
49.44	74.4284	73.9145	46.3893	46.841	27.3551	27.0319	15.1921	14.6425	8.1488	7.63928
50.44	74.4792	73.9146	46.406	46.8416	27.3799	27.0331	15.1937	14.6437	8.13403	7.6401
51.44	74.5322	73.9147	46.4058	46.8422	27.3926	27.034	15.2202	14.6447	8.15168	7.64081
52.44	74.5841	73.9148	46.4148	46.8427	27.4284	27.0348	15.2175	14.6456	8.14838	7.64142
53.44	74.6495	73.9148	46.4621	46.843	27.4339	27.0355	15.2329	14.6464	8.16844	7.64194
54.44	74.7413	73.9149	46.4805	46.8433	27.4234	27.0361	15.2483	14.647	8.1673	7.6424
55.44	74.7895	73.9149	46.5113	46.8436	27.3976	27.0366	15.2413	14.6475	8.15424	7.64279
56.44	74.8582	73.9149	46.5494	46.8438	27.4053	27.037	15.2352	14.648	8.15076	7.64313
57.44	74.9288	73.9149	46.5705	46.844	27.4102	27.0374	15.2617	14.6484	8.17224	7.64342
58.44	74.9917	73.915	46.5921	46.8441	27.4171	27.0377	15.2578	14.6488	8.17441	7.64368
59.44	75.0659	73.915	46.6166	46.8442	27.4297	27.0379	15.2468	14.6491	8.18506	7.6439
60.44	75.1075	73.915	46.6482	46.8443	27.4433	27.0381	15.2351	14.6493	8.17825	7.64409
61.44	75.1444	73.915	46.6803	46.8444	27.4511	27.0383	15.2386	14.6495	8.16553	7.64425
62.44	75.1983	73.915	46.7095	46.8445	27.4452	27.0385	15.2527	14.6497	8.16012	7.64439
63.44	75.2856	73.915	46.7528	46.8446	27.4481	27.0386	15.2611	14.6499	8.14908	7.64451
64.44	75.333	73.915	46.7595	46.8446	27.4399	27.0387	15.2857	14.65	8.13768	7.64462
65.44	75.3217	73.915	46.7807	46.8446	27.4185	27.0388	15.2954	14.6502	8.13918	7.64471
66.44	75.3006	73.915	46.7864	46.8447	27.4002	27.0389	15.2572	14.6503	8.163	7.64479
67.44	75.3131	73.915	46.7564	46.8447	27.3803	27.039	15.2134	14.6504	8.12918	7.64486
68.44	75.3214	73.915	46.6941	46.8447	27.3756	27.039	15.1626	14.6504	8.10798	7.64492
69.44	75.2807	73.915	46.6394	46.8447	27.3786	27.0391	15.135	14.6505	8.13799	7.64497
70.44	75.269	73.915	46.619	46.8447	27.4123	27.0391	15.1454	14.6505	8.17598	7.64501
71.44	75.2308	73.915	46.6192	46.8448	27.4134	27.0392	15.2081	14.6506	8.20167	7.64505
72.44	75.2088	73.915	46.6102	46.8448	27.391	27.0392	15.2403	14.6506	8.23908	7.64508
73.44	75.1902	73.915	46.5865	46.8448	27.3629	27.0392	15.264	14.6507	8.25895	7.64511
74.44	75.1668	73.915	46.5553	46.8448	27.3663	27.0392	15.268	14.6507	8.27181	7.64513
75.44	75.1487	73.915	46.5559	46.8448	27.3715	27.0392	15.2808	14.6507	8.2769	7.64516
76.44	75.1436	73.915	46.5507	46.8448	27.3657	27.0393	15.2768	14.6508	8.29073	7.64517
77.44	75.1102	73.915	46.5204	46.8448	27.3678	27.0393	15.2606	14.6508	8.3154	7.64519
78.44	75.0883	73.915	46.4804	46.8448	27.3313	27.0393	15.2494	14.6508	8.31711	7.6452
79.44	75.0568	73.915	46.4296	46.8448	27.2878	27.0393	15.224	14.6508	8.29538	7.64522
80.44	75.016	73.915	46.4084	46.8448	27.245	27.0393	15.1932	14.6508	8.25647	7.64523
81.44	75.0062	73.915	46.3927	46.8448	27.2126	27.0393	15.1764	14.6508	8.23056	7.64523
82.44	75.0142	73.915	46.3931	46.8448	27.2149	27.0393	15.1483	14.6508	8.22737	7.64524
83.44	75.0167	73.915	46.3842	46.8448	27.2115	27.0393	15.1486	14.6508	8.25029	7.64525
84.44	75.0241	73.915	46.3731	46.8448	27.209	27.0393	15.1538	14.6508	8.28307	7.64525
85.44	75.0416	73.915	46.3724	46.8448	27.2124	27.0393	15.1438	14.6509	8.29752	7.64526
86.44	75.0294	73.915	46.3414	46.8448	27.2136	27.0393	15.1494	14.6509	8.32204	7.64526
87.44	75.0135	73.915	46.3439	46.8448	27.1999	27.0393	15.1501	14.6509	8.31308	7.64527
88.44	74.9922	73.915	46.3161	46.8448	27.177	27.0393	15.1452	14.6509	8.31144	7.64527
89.44	74.9867	73.915	46.304	46.8448	27.1519	27.0393	15.1519	14.6509	8.29535	7.64527
90.44	74.9679	73.915	46.3218	46.8448	27.1344	27.0393	15.15	14.6509	8.30601	7.64528
91.44	74.9623	73.915	46.3057	46.8448	27.0952	27.0393	15.1442	14.6509	8.30707	7.64528
92.44	74.9616	73.915	46.3148	46.8448	27.1019	27.0393	15.1441	14.6509	8.3185	7.64528
93.44	74.9541	73.915	46.2999	46.8448	27.126	27.0393	15.136	14.6509	8.32732	7.64528
94.44	74.9492	73.915	46.2923	46.8448	27.1292	27.0393	15.1492	14.6509	8.34439	7.64528
95.44	74.9437	73.915	46.2862	46.8448	27.1173	27.0393	15.1412	14.6509	8.36333	7.64528
96.44	74.9509	73.915	46.2728	46.8448	27.1217	27.0393	15.135	14.6509	8.36024	7.64528
97.44	74.9444	73.915	46.2599	46.8448	27.089	27.0393	15.1367	14.6509	8.36359	7.64528
98.44	74.9496	73.915	46.2315	46.8448	27.0761	27.0393	15.1285	14.6509	8.36339	7.64529
99.44	74.9344	73.915	46.1927	46.8448	27.066	27.0393	15.1073	14.6509	8.36518	7.64529
100.44	74.9352	73.915	46.1815	46.8448	27.0697	27.0393	15.0971	14.6509	8.34474	7.64529
101.44	74.932	73.915	46.1984	46.8448	27.0754	27.0393	15.0961	14.6509	8.34585	7.64529
102.44	74.9637	73.915	46.2199	46.8448	27.0864	27.0393	15.0903	14.6509	8.36226	7.64529
103.44	75.0004	73.915	46.2321	46.8448	27.0785	27.0393	15.0902	14.6509	8.36565	7.64529
104.44	75.0149	73.915	46.2419	46.8448	27.0785	27.0393	15.0934	14.6509	8.3476	7.64529
105.44	75.0221	73.915	46.2607	46.8448	27.0854	27.0394	15.0997	14.6509	8.35604	7.64529
106.44	75.0147	73.915	46.2626	46.8448	27.0916	27.0394	15.0998	14.6509	8.37137	7.64529
107.44	75.0209	73.915	46.2679	46.8448	27.0843	27.0394	15.0957	14.6509	8.36365	7.64529
108.44	75.0262	73.915	46.2559	46.8448	27.1029	27.0394	15.1065	14.6509	8.36316	7.64529
109.44	75.0532	73.915	46.2507	46.8448	27.1018	27.0394	15.1205	14.6509	8.37842	7.64529
110.44	75.0687	73.915	46.2395	46.8448	27.0965	27.0394	15.141	14.6509	8.37643	7.64529
111.44	75.0805	73.915	46.256	46.8448	27.1172	27.0394	15.1609	14.6509	8.39613	7.64529
112.44	75.0902	73.915	46.2731	46.8448	27.1238	27.0394	15.1641	14.6509	8.39876	7.64529
113.44	75.1017	73.915	46.2983	46.8448	27.1173	27.0394	15.1741	14.6509	8.43193	7.64529
114.44	75.1101	73.915	46.3064	46.8448	27.1298	27.0394	15.1682	14.6509	8.43745	7.64529
115.44	75.1207	73.915	46.3123	46.8448	27.151	27.0394	15.1483	14.6509	8.43072	7.64529
116.44	75.0774	73.915	46.2888	46.8448	27.1594	27.0394	15.1539	14.6509	8.45149	7.64529
117.44	74.969	73.915	46.2109	46.8448	27.1072	27.0394	15.1669	14.6509	8.43103	7.64529
118.44	74.8992	73.915	46.1893	46.8448	27.0501	27.0394	15.168	14.6509	8.4283	7.64529
119.44	74.042	73.915	45.2392	46.8448	26.7867	27.0394	14.6923	14.6509	8.18581	7.64529
120.44	73.0988	69.5084	46.6282	45.3001	25.149	24.7267	15.9116	14.6509	9.0305	7.64529
121.44	59.0635	60.4458	36.4642	39.3938	20.4158	21.5028	12.1092	12.7407	6.65073	6.70445
122.44	50.8084	52.5649	31.702	34.2576	17.4211	18.6992	10.7983	11.0795	6.21511	5.83032
123.44	43.4725	45.7114	26.9865	29.7911	14.8349	16.2612	9.171	9.63499	5.19718	5.07016
124.44	37.502	39.7515	23.1913	25.9069	12.798	14.1411	7.8766	8.37877	4.61735	4.4091
125.44	32.5723	34.5687	19.9396	22.5291	11.01	12.2973	6.8748	7.28634	4.03573	3.83424
126.44	28.3881	30.0616	17.2557	19.5918	9.56133	10.694	5.99737	6.33634	3.56185	3.33433
127.44	24.7533	26.1421	14.996	17.0374	8.37531	9.29971	5.30735	5.5102	3.20046	2.8996
128.44	21.7132	22.7337	13.0786	14.816	7.31678	8.08721	4.65696	4.79178	2.92057	2.52154
129.44	19.1724	19.7696	11.4469	12.8843	6.40096	7.03279	4.15582	4.16702	2.64214	2.19278
130.44	16.9727	17.1921	10.0495	11.2044	5.64235	6.11585	3.72242	3.62372	2.3895	1.90688
131.44	15.0755	14.9505	8.86029	9.74358	5.02683	5.31846	3.38825	3.15126	2.17485	1.65826
132.44	13.4443	13.0013	7.88516	8.4732	4.46218	4.62503	3.06891	2.74039	1.97187	1.44205
133.44	12.0546	11.3062	7.00572	7.36846	4.01323	4.02202	2.81842	2.3831	1.86132	1.25403
134.44	10.8766	9.83205	6.23271	6.40775	3.61213	3.49762	2.55606	2.07239	1.75553	1.09053
135.44	9.83883	8.55014	5.56923	5.5723	3.25331	3.0416	2.3285	1.80218	1.61275	0.948339
136.44	8.95472	7.43537	4.99501	4.84578	2.92823	2.64503	2.16314	1.56721	1.48106	0.824692
137.44	8.16459	6.46594	4.55072	4.21398	2.70738	2.30017	2.0543	1.36287	1.42358	0.717166
138.44	7.48176	5.6229	4.19778	3.66456	2.46207	2.00027	1.92539	1.18518	1.42377	0.62366
139.44	6.91073	4.88978	3.83905	3.18677	2.31821	1.73947	1.81111	1.03065	1.35493	0.542345
140.44	6.40836	4.25225	3.55486	2.77128	2.22964	1.51267	1.72341	0.89627	1.30542	0.471632
141.44	5.96477	3.69784	3.25163	2.40996	2.06509	1.31545	1.67226	0.779412	1.30681	0.41014
142.44	5.59046	3.21571	3.05751	2.09574	1.94317	1.14393	1.60979	0.677789	1.29703	0.356664
143.44	5.28289	2.79644	2.82529	1.82249	1.84328	0.994785	1.55734	0.589417	1.2743	0.310161
144.44	4.9534	2.43184	2.64125	1.58487	1.74048	0.865082	1.51293	0.512567	1.26715	0.269722
145.44	4.74025	2.11477	2.50479	1.37823	1.64813	0.75229	1.45873	0.445737	1.21783	0.234554
146.44	4.50001	1.83904	2.38928	1.19853	1.56946	0.654204	1.43082	0.387621	1.18246	0.203972
147.44	4.29032	1.59926	2.25328	1.04227	1.49055	0.568907	1.36405	0.337081	1.14213	0.177378
148.44	4.10383	1.39075	2.13428	0.906372	1.4384	0.494731	1.30722	0.293132	1.12746	0.154251
149.44	3.90071	1.20942	2.05067	0.788196	1.40478	0.430226	1.27367	0.254912	1.14375	0.134139
150.44	3.76303	1.05173	1.96631	0.685429	1.35699	0.374132	1.26903	0.221676	1.14873	0.11665
151.44	3.67695	0.914601	1.90846	0.59606	1.32782	0.325352	1.27045	0.192773	1.15349	0.101441
152.44	3.56739	0.795353	1.83176	0.518344	1.29229	0.282931	1.25967	0.167639	1.14617	0.0882144
153.44	3.45047	0.691652	1.77229	0.450761	1.28998	0.246042	1.2349	0.145782	1.11877	0.0767128
154.44	3.36305	0.601473	1.7458	0.391989	1.27812	0.213962	1.21585	0.126774	1.10667	0.0667107
155.44	3.28908	0.523051	1.70734	0.340881	1.27188	0.186065	1.22308	0.110245	1.10364	0.0580128
156.44	3.176	0.454854	1.65352	0.296436	1.23538	0.161805	1.20972	0.0958709	1.10016	0.0504489
157.44	3.06251	0.395549	1.60361	0.257785	1.20189	0.140709	1.16399	0.0833709	1.0823	0.0438712
158.44	3.00308	0.343976	1.55804	0.224175	1.17884	0.122363	1.14958	0.0725008	1.08293	0.0381511
159.44	2.92996	0.299127	1.52336	0.194946	1.14478	0.106409	1.1313	0.0630479	1.07418	0.0331769
160.44	2.88723	0.260126	1.50104	0.169528	1.13341	0.0925348	1.13334	0.0548275	1.06702	0.0288512
161.44	2.83584	0.22621	1.48053	0.147425	1.11489	0.0804698	1.15022	0.047679	1.08033	0.0250895
162.44	2.80105	0.196716	1.4565	0.128203	1.10065	0.0699779	1.14303	0.0414624	1.07577	0.0218182
163.44	2.77504	0.171068	1.41801	0.111488	1.10408	0.060854	1.13482	0.0360564	1.07183	0.0189735
164.44	2.74857	0.148763	1.40005	0.0969514	1.10784	0.0529197	1.14052	0.0313553	1.07939	0.0164997
165.44	2.7278	0.129367	1.39703	0.0843106	1.11797	0.0460198	1.14367	0.0272671	1.08512	0.0143484
166.44	2.69616	0.1125	1.3784	0.0733179	1.13965	0.0400196	1.15293	0.0237119	1.0834	0.0124776
167.44	2.69215	0.0978318	1.3938	0.0637585	1.15738	0.0348017	1.1617	0.0206203	1.08197	0.0108507
168.44	2.67624	0.0850761	1.37976	0.0554455	1.14547	0.0302642	1.16686	0.0179318	1.07064	0.00943599
169.44	2.6336	0.0739837	1.3616	0.0482163	1.14098	0.0263182	1.16917	0.0155938	1.06504	0.0082057
170.44	2.60644	0.0643374	1.35222	0.0419297	1.13029	0.0228868	1.17233	0.0135606	1.05459	0.00713581
171.44	2.56639	0.0559489	1.35269	0.0364628	1.12567	0.0199027	1.16554	0.0117925	1.05914	0.00620542
172.44	2.54551	0.0486541	1.36139	0.0317087	1.13619	0.0173078	1.15944	0.010255	1.05292	0.00539634
173.44	2.5207	0.0423105	1.35847	0.0275744	1.13703	0.0150511	1.1703	0.0089179	1.07193	0.00469275
174.44	2.47812	0.0367939	1.35847	0.0239792	1.12403	0.0130887	1.18684	0.00775516	1.07803	0.0040809
175.44	2.4572	0.0319966	1.33908	0.0208527	1.11524	0.0113822	1.18897	0.00674402	1.06056	0.00354882
176.44	2.43679	0.0278248	1.32433	0.0181339	1.12043	0.00989813	1.19232	0.00586471	1.05282	0.00308611
177.44	2.40166	0.0241969	1.30557	0.0157695	1.11337	0.00860758	1.20883	0.00510005	1.04184	0.00268373
178.44	2.38871	0.021042	1.30807	0.0137134	1.12769	0.0074853	1.21218	0.00443509	1.04274	0.00233382
179.44	2.37405	0.0182985	1.32355	0.0119254	1.12988	0.00650934	1.23013	0.00385683	1.06274	0.00202953
180.44	2.34672	0.0159127	1.32686	0.0103706	1.13885	0.00566063	1.23883	0.00335397	1.07344	0.00176491
181.44	2.35007	0.013838	1.32188	0.00901841	1.15646	0.00492258	1.25411	0.00291667	1.10118	0.0015348
182.44	2.3536	0.0120337	1.34366	0.00784256	1.17032	0.00428076	1.25961	0.00253638	1.12016	0.00133469
183.44	2.34927	0.0104647	1.34869	0.00682003	1.18207	0.00372262	1.25741	0.00220568	1.12873	0.00116067
184.44	2.3414	0.0091003	1.33388	0.00593081	1.19717	0.00323726	1.25779	0.0019181	1.13919	0.00100934
185.44	2.3329	0.00791378	1.32852	0.00515753	1.20743	0.00281517	1.24875	0.00166801	1.14267	0.000877735
186.44	2.33366	0.00688195	1.34541	0.00448508	1.22162	0.00244812	1.25091	0.00145053	1.12503	0.000763293
187.44	2.32532	0.00598466	1.36427	0.0039003	1.24509	0.00212893	1.25992	0.00126141	1.14021	0.000663773
188.44	2.31148	0.00520436	1.37158	0.00339177	1.2467	0.00185135	1.26185	0.00109694	1.15331	0.000577228
189.44	2.31087	0.0045258	1.39854	0.00294954	1.2601	0.00160997	1.2628	0.000953917	1.15504	0.000501967
190.44	2.31723	0.00393572	1.4059	0.00256497	1.2734	0.00140005	1.28904	0.000829542	1.17416	0.000436519
191.44	2.32733	0.00342257	1.41571	0.00223054	1.28216	0.00121751	1.30129	0.000721384	1.18556	0.000379605
192.44	2.31064	0.00297632	1.42012	0.00193972	1.27541	0.00105877	1.30804	0.000627328	1.20451	0.000330111
193.44	2.30473	0.00258826	1.41634	0.00168681	1.27385	0.000920723	1.3074	0.000545535	1.21107	0.00028707
194.44	2.30371	0.00225079	1.4067	0.00146688	1.29011	0.000800676	1.30162	0.000474406	1.21151	0.000249641
195.44	2.28934	0.00195733	1.41175	0.00127562	1.2872	0.000696282	1.32248	0.000412552	1.23032	0.000217092
196.44	2.2821	0.00170213	1.41238	0.0011093	1.29394	0.000605498	1.3205	0.000358762	1.22364	0.000188787
197.44	2.27883	0.0014802	1.39318	0.000964668	1.3007	0.000526552	1.33077	0.000311986	1.2321	0.000164172
198.44	2.27355	0.0012872	1.39205	0.000838892	1.30433	0.000457898	1.33818	0.000271308	1.22725	0.000142767
199.44	2.2623	0.00111938	1.39303	0.000729515	1.29402	0.000398196	1.33874	0.000235934	1.23182	0.000124152
200.44	2.25621	0.000973428	1.39523	0.000634398	1.30463	0.000346278	1.35739	0.000205172	1.22131	0.000107965
201.44	2.25854	0.000846509	1.41449	0.000551684	1.29212	0.000301129	1.36677	0.000178421	1.23784	9.38883e-05
202.44	2.25683	0.000736139	1.40611	0.000479753	1.29206	0.000261867	1.36216	0.000155158	1.22497	8.16468e-05
203.44	2.25616	0.000640159	1.43621	0.000417202	1.29324	0.000227724	1.37888	0.000134928	1.22005	7.10015e-05
204.44	2.26258	0.000556693	1.43867	0.000362806	1.29649	0.000198033	1.37524	0.000117336	1.23049	6.17441e-05
205.44	2.24659	0.00048411	1.44515	0.000315502	1.29847	0.000172213	1.38467	0.000102037	1.22763	5.36937e-05
206.44	2.22559	0.00042099	1.43273	0.000274366	1.31355	0.000149759	1.37975	8.87333e-05	1.23006	4.66929e-05
207.44	2.21597	0.0003661	1.44144	0.000238593	1.33316	0.000130233	1.3781	7.7164e-05	1.23041	4.0605e-05
208.44	2.22026	0.000318367	1.45413	0.000207485	1.36832	0.000113253	1.38005	6.71031e-05	1.23926	3.53108e-05
209.44	2.22569	0.000276857	1.44689	0.000180432	1.37528	9.84865e-05	1.39613	5.8354e-05	1.24915	3.07069e-05
210.44	2.2132	0.00024076	1.45809	0.000156907	1.38203	8.56455e-05	1.40108	5.07456e-05	1.26139	2.67032e-05
211.44	2.21792	0.000209369	1.47464	0.000136449	1.40415	7.44788e-05	1.41169	4.41292e-05	1.26243	2.32216e-05
212.44	2.22417	0.000182071	1.49152	0.000118658	1.39291	6.4768e-05	1.40935	3.83755e-05	1.27454	2.01939e-05
213.44	2.20581	0.000158332	1.49185	0.000103187	1.39447	5.63234e-05	1.40927	3.3372e-05	1.28274	1.75609e-05
214.44	2.19566	0.000137688	1.51041	8.97334e-05	1.40424	4.89798e-05	1.41755	2.90209e-05	1.29426	1.52713e-05
215.44	2.20464	0.000119736	1.51956	7.80337e-05	1.42416	4.25936e-05	1.4109	2.5237e-05	1.29242	1.32802e-05
216.44	2.20948	0.000104124	1.52846	6.78594e-05	1.4405	3.70402e-05	1.42231	2.19466e-05	1.29138	1.15487e-05
217.44	2.21457	9.05482e-05	1.55064	5.90117e-05	1.46292	3.22107e-05	1.42958	1.90851e-05	1.29912	1.00429e-05
218.44	2.20621	7.87422e-05	1.56216	5.13176e-05	1.46518	2.8011e-05	1.44215	1.65967e-05	1.31204	8.73348e-06
219.44	2.20366	6.84756e-05	1.5629	4.46266e-05	1.46543	2.43588e-05	1.45004	1.44328e-05	1.30367	7.59478e-06
220.44	2.20594	5.95475e-05	1.55607	3.88081e-05	1.46992	2.11829e-05	1.45843	1.2551e-05	1.28967	6.60455e-06
221.44	2.21011	5.17835e-05	1.53735	3.37481e-05	1.46713	1.8421e-05	1.45622	1.09146e-05	1.28958	5.74343e-06
222.44	2.21245	4.50318e-05	1.54034	2.9348e-05	1.47806	1.60192e-05	1.44841	9.49149e-06	1.29211	4.99458e-06
223.44	2.21699	3.91604e-05	1.54634	2.55215e-05	1.48542	1.39306e-05	1.4477	8.25396e-06	1.29919	4.34337e-06
224.44	2.23355	3.40546e-05	1.54166	2.21939e-05	1.51401	1.21143e-05	1.43748	7.17778e-06	1.31694	3.77707e-06
225.44	2.23238	2.96144e-05	1.56061	1.93002e-05	1.52573	1.05348e-05	1.4406	6.24192e-06	1.33002	3.28461e-06
226.44	2.243	2.57532e-05	1.57076	1.67838e-05	1.53518	9.16121e-06	1.43928	5.42808e-06	1.34815	2.85635e-06
227.44	2.25332	2.23954e-05	1.5815	1.45955e-05	1.53737	7.96674e-06	1.42856	4.72035e-06	1.36091	2.48393e-06
228.44	2.24918	1.94755e-05	1.58813	1.26925e-05	1.52612	6.92801e-06	1.4285	4.1049e-06	1.35678	2.16007e-06
229.44	2.25465	1.69362e-05	1.58658	1.10376e-05	1.53348	6.02472e-06	1.42928	3.56969e-06	1.36029	1.87843e-06
230.44	2.26761	1.4728e-05	1.60011	9.59847e-06	1.54299	5.2392e-06	1.45693	3.10426e-06	1.36103	1.63352e-06
231.44	2.25621	1.28077e-05	1.60123	8.34699e-06	1.53754	4.55609e-06	1.46559	2.69952e-06	1.35071	1.42053e-06
232.44	2.24699	1.11378e-05	1.60143	7.25868e-06	1.54402	3.96206e-06	1.45005	2.34755e-06	1.34959	1.23532e-06
233.44	2.25661	9.68562e-06	1.61926	6.31227e-06	1.55542	3.44547e-06	1.46834	2.04147e-06	1.34799	1.07425e-06
234.44	2.26769	8.42278e-06	1.6317	5.48926e-06	1.57769	2.99624e-06	1.47997	1.77529e-06	1.3497	9.3419e-07
235.44	2.27668	7.32459e-06	1.66039	4.77355e-06	1.58619	2.60558e-06	1.49927	1.54383e-06	1.36091	8.12387e-07
236.44	2.26833	6.36959e-06	1.66333	4.15116e-06	1.59604	2.26586e-06	1.50935	1.34254e-06	1.38089	7.06466e-07
237.44	2.28144	5.5391e-06	1.67564	3.60992e-06	1.60575	1.97043e-06	1.52076	1.16749e-06	1.39334	6.14355e-07
238.44	2.29677	4.8169e-06	1.68774	3.13925e-06	1.62573	1.71352e-06	1.53827	1.01527e-06	1.40942	5.34253e-07
239.44	2.3215	4.18886e-06	1.72489	2.72994e-06	1.62025	1.4901e-06	1.54875	8.82898e-07	1.42983	4.64596e-07
240.44	2.2893	3.6427e-06	1.69122	2.37401e-06	1.57025	1.29582e-06	1.53125	7.67783e-07	1.47209	4.0402e-07

## Sheet: biotin-C3b ISG65ΔL2
Cycle: 8 ISG65dL2 5000 nM_X	Cycle: 9 ISG65dL2 5000 nM_Y	Fitted Cycle: 9 ISG65dL2 5000 _Y	Cycle: 10 ISG65dL2 2500 nM_Y	Fitted Cycle: 10 ISG65dL2 2500_Y	Cycle: 11 ISG65dL2 1250 nM_Y	Fitted Cycle: 11 ISG65dL2 1250_Y	Cycle: 12 ISG65dL2 625 nM_Y	Fitted Cycle: 12 ISG65dL2 625 _Y	Cycle: 13 ISG65dL2 312.5 nM_Y	Fitted Cycle: 13 ISG65dL2 312._Y
-59.96	-0.602905	0	-0.166728	0	-0.518495	0	-0.116537	0	-0.00695801	0
-58.96	-0.339233	0	-0.0596943	0	-0.183722	0	0.00377989	0	0.0184326	0
-57.96	-0.265991	0	-0.00129509	0	-0.0759077	0	0.0199924	0	0.0330811	0
-56.96	-0.669312	0	-0.290163	0	-0.185675	0	0.0408893	0	0.0750732	0
-55.96	-0.639038	0	-0.105204	0	-0.381774	0	-0.199543	0	0.0487061	0
-54.96	-0.559937	0	-0.0964131	0	-0.182549	0	-0.0774693	0	0.0477295	0
-53.96	-0.550171	0	-0.0456314	0	-0.155205	0	-0.087235	0	-0.0206299	0
-52.96	-0.550171	0	0.00905609	0	-0.13958	0	-0.0520782	0	0.00671387	0
-51.96	-0.515015	0	0.0180411	0	-0.0833278	0	-0.0458269	0	0.0321045	0
-50.96	-0.599976	0	-0.0997314	0	-0.039185	0	-0.0635986	0	0.00769043	0
-49.96	-0.849976	0	-0.359497	0	-0.0841055	0	0.0418711	0	0.0780029	0
-48.96	-0.642944	0	-0.0286384	0	-0.437234	0	-0.149928	0	-0.0274658	0
-47.96	-0.420288	0	-0.0782471	0	0.0291748	0	-0.00891113	0	-0.0723877	0
-46.96	-0.55896	0	-0.234889	0	-0.276688	0	-0.117116	0	-0.0626221	0
-45.96	-0.479858	0	-0.0448532	0	-0.348183	0	-0.236069	0	0.0379639	0
-44.96	-0.560913	0	0.153	0	-0.232162	0	-0.0718079	0	0.134644	0
-43.96	-1.20935	0	-1.02512	0	0.026444	0	0.0895288	0	0.105347	0
-42.96	-0.515015	0	0.369599	0	-0.802093	0	-0.745056	0	-0.286255	0
-41.96	0.109985	0	0.36453	0	0.395591	0	0.385431	0	0.307495	0
-40.96	0.150024	0	0.460816	0	0.253785	0	0.170777	0	0.146362	0
-39.96	0.06604	0	0.340894	0	0.243629	0	0.239527	0	0.171753	0
-38.96	-0.0863037	0	0.180738	0	0.153785	0	0.159449	0	0.13269	0
-37.96	-0.234375	0	0.0692139	0	0.0448003	0	0.0926516	0	0.1073	0
-36.96	-0.438721	0	-0.0880861	0	-0.0433111	0	0.36936	0	0.463257	0
-35.96	-0.703491	0	-0.284009	0	-0.243386	0	-0.0492201	0	0.119873	0
-34.96	-0.755981	0	-0.223244	0	-0.377495	0	-0.119584	0	0.0887451	0
-33.96	-0.835999	0	-0.342201	0	-0.266287	0	-0.0756979	0	0.0813599	0
-32.96	-0.837952	0	-0.176919	0	-0.499203	0	-0.000139952	0	0.193298	0
-31.96	-0.449768	0	-0.0480354	0	-0.128786	0	-0.241395	0	-0.0669556	0
-30.96	-0.5401	0	-0.172156	0	-0.0531502	0	-0.01283	0	0.0901489	0
-29.96	-0.601135	0	-0.164418	0	-0.151395	0	-0.0756001	0	0.0358276	0
-28.96	-0.608154	0	-0.150904	0	-0.149857	0	-0.0675557	0	0.0385742	0
-27.96	-0.587708	0	-0.123963	0	-0.151736	0	-0.0598774	0	0.0426636	0
-26.96	-0.607483	0	-0.132655	0	-0.142654	0	-0.0544329	0	0.0360718	0
-25.96	-0.575928	0	-0.110401	0	-0.129177	0	-0.10862	0	0.0279541	0
-24.96	-0.38739	0	0.0250605	0	-0.0639176	0	-0.103504	0	0.0498657	0
-23.96	-0.325745	0	0.0367305	0	-0.0534438	0	-0.0179087	0	0.069519	0
-22.96	-0.287964	0	0.0286858	0	-0.0405294	0	0.012694	0	0.0760498	0
-21.96	-0.225708	0	0.0502679	0	-0.0312032	0	0.0233873	0	0.0959473	0
-20.96	-0.168579	0	0.0701408	0	-0.0376242	0	0.0439683	0	0.098877	0
-19.96	-0.135742	0	0.0829828	0	-0.0261979	0	0.0573231	0	0.104004	0
-18.96	-0.0999146	0	0.0841669	0	-0.0124529	0	0.0620716	0	0.0960083	0
-17.96	-0.0914917	0	0.0447627	0	-0.00615376	0	0.041979	0	0.0696411	0
-16.96	-0.0820313	0	0.0395989	0	-0.00779027	0	0.0163316	0	0.050293	0
-15.96	-0.0484619	0	0.0576652	0	0.00258553	0	0.0281723	0	0.0626221	0
-14.96	-0.0271606	0	0.0546258	0	0.0189188	0	0.0311876	0	0.0637817	0
-13.96	-0.015625	0	0.0713372	0	0.0233378	0	0.0336657	0	0.0737305	0
-12.96	0.00762939	0	0.0998162	0	0.0214334	0	0.0458848	0	0.0696411	0
-11.96	0.0354614	0	0.119347	0	0.031199	0	0.034166	0	0.0582886	0
-10.96	0.0610962	0	0.119811	0	0.0269755	0	0.0507188	0	0.0510864	0
-9.95999	0.0619507	0	0.103039	0	0.0279278	0	0.0425647	0	0.0547485	0
-8.95999	0.0643921	0	0.100695	0	0.00319594	0	0.0401962	0	0.0425415	0
-7.95999	0.0762939	0	0.115893	0	0.00405023	0	0.0257307	0	0.0467529	0
-6.95999	0.113892	0	0.12019	0	0.0278054	0	0.0246811	0	0.0551758	0
-5.95999	0.129395	0	0.131884	0	0.0420144	0	0.0322006	0	0.0737305	0
-4.95999	0.138489	0	0.12384	0	0.0308818	0	0.0263048	0	0.0552368	0
-3.95999	0.148743	0	0.00108677	0	0.0121104	0	0.0163947	0	0.00958252	0
-2.95999	0.26239	0	0.0928066	0	0.0467911	0	0.163213	0	0.160828	0
-1.95999	-0.0743408	0	0.146678	0	-0.154816	0	-0.207133	0	-0.139648	0
-0.959991	0.599365	0	0.758611	0	0.22615	0	0.265757	0	0.371216	0
0.0400085	3.37335	0	6.7596	5.70698	-0.755071	0	-0.42788	0	-0.750793	0
1.04001	30.6346	24.0598	21.0145	16.8168	7.39898	4.67636	3.75089	2.63735	1.98975	1.54972
2.04001	52.7761	42.7863	31.3209	25.7572	13.4195	9.98798	6.24715	5.2693	2.50616	2.83376
3.04001	67.8254	57.3618	38.4616	32.9518	18.2025	14.3343	8.46652	7.44096	3.22723	3.89766
4.04001	77.699	68.7064	43.6244	38.7415	21.452	17.8907	9.93798	9.23281	3.69647	4.77916
5.04001	84.2736	77.5363	47.2942	43.4006	23.8593	20.8007	11.1957	10.7113	3.81256	5.50953
6.04001	88.7454	84.4089	49.9476	47.15	25.4186	23.1819	12.0675	11.9312	3.84717	6.11469
7.04001	92.2614	89.7581	52.0042	50.1672	26.7094	25.1303	12.7019	12.9378	3.91058	6.6161
8.04001	95.1533	93.9215	53.6807	52.5952	27.9547	26.7246	13.2392	13.7683	4.15308	7.03154
9.04001	97.2419	97.1621	55.0098	54.5491	28.9051	28.0292	13.6939	14.4536	4.35992	7.37576
10.04	98.811	99.6843	56.0178	56.1215	29.663	29.0967	14.0681	15.019	4.53259	7.66097
11.04	99.9991	101.647	56.8128	57.3868	30.2893	29.9702	14.4208	15.4855	4.6026	7.89728
12.04	100.914	103.175	57.4409	58.405	30.7253	30.6849	14.705	15.8705	4.65997	8.09308
13.04	101.622	104.365	57.9497	59.2244	31.0959	31.2697	14.8711	16.1881	4.74554	8.25532
14.04	102.172	105.29	58.3815	59.8838	31.4249	31.7483	15.0049	16.4502	4.82831	8.38974
15.04	102.596	106.011	58.7386	60.4145	31.7201	32.1398	15.1571	16.6664	4.88464	8.50111
16.04	102.934	106.572	59.0026	60.8415	32.0539	32.4602	15.2923	16.8449	4.95508	8.59339
17.04	103.257	107.008	59.2384	61.1851	32.357	32.7224	15.4518	16.9921	5.0553	8.66984
18.04	103.532	107.348	59.4699	61.4617	32.6038	32.937	15.5291	17.1136	5.10425	8.73319
19.04	103.776	107.612	59.6695	61.6842	32.7918	33.1125	15.609	17.2138	5.14648	8.78568
20.04	104.006	107.818	59.8526	61.8633	32.9425	33.2562	15.6779	17.2965	5.16235	8.82917
21.04	104.24	107.978	59.9629	62.0074	33.0942	33.3737	15.7356	17.3647	5.16235	8.8652
22.04	104.427	108.103	60.0846	62.1234	33.2601	33.4699	15.7852	17.421	5.17688	8.89506
23.04	104.606	108.2	60.2138	62.2167	33.4107	33.5486	15.8379	17.4675	5.20667	8.91979
24.04	104.77	108.275	60.3712	62.2918	33.578	33.613	15.8881	17.5058	5.24561	8.94029
25.04	104.914	108.334	60.4812	62.3522	33.7333	33.6656	15.963	17.5374	5.28137	8.95727
26.04	105.06	108.38	60.5884	62.4009	33.8814	33.7088	16.0135	17.5635	5.29578	8.97134
27.04	105.191	108.416	60.725	62.44	34.0084	33.744	16.0545	17.585	5.31824	8.983
28.04	105.316	108.443	60.8731	62.4715	34.1289	33.7729	16.1035	17.6028	5.34906	8.99266
29.04	105.48	108.465	61.0083	62.4969	34.234	33.7965	16.1651	17.6175	5.37329	9.00066
30.04	105.623	108.482	61.0968	62.5172	34.352	33.8158	16.1962	17.6296	5.41211	9.00729
31.04	105.732	108.495	61.1682	62.5337	34.4677	33.8317	16.2227	17.6395	5.41333	9.01278
32.04	105.831	108.505	61.2545	62.5469	34.593	33.8446	16.2303	17.6478	5.42657	9.01734
33.04	105.942	108.513	61.3297	62.5575	34.7077	33.8552	16.2671	17.6546	5.42688	9.02111
34.04	106.07	108.519	61.3978	62.566	34.7918	33.8638	16.2973	17.6602	5.43927	9.02423
35.04	106.167	108.524	61.4687	62.5729	34.8505	33.8709	16.3061	17.6648	5.43457	9.02682
36.04	106.241	108.527	61.5215	62.5785	34.9039	33.8767	16.3254	17.6686	5.41754	9.02897
37.04	106.3	108.53	61.5787	62.5829	34.9628	33.8815	16.3344	17.6718	5.39905	9.03074
38.04	106.346	108.533	61.6055	62.5865	35.0087	33.8854	16.3495	17.6744	5.38501	9.03222
39.04	106.398	108.534	61.6657	62.5894	35.0588	33.8885	16.3691	17.6765	5.37775	9.03344
40.04	106.48	108.536	61.7277	62.5917	35.106	33.8911	16.3846	17.6783	5.38196	9.03445
41.04	106.566	108.537	61.7861	62.5936	35.1594	33.8933	16.4174	17.6797	5.40387	9.03529
42.04	106.64	108.538	61.8213	62.5951	35.2278	33.895	16.428	17.6809	5.40131	9.03598
43.04	106.692	108.538	61.8573	62.5963	35.2761	33.8964	16.4268	17.6819	5.37512	9.03655
44.04	106.771	108.539	61.895	62.5973	35.3343	33.8976	16.4355	17.6828	5.36523	9.03703
45.04	106.842	108.539	61.9509	62.5981	35.3884	33.8986	16.4738	17.6834	5.38257	9.03743
46.04	106.896	108.539	61.97	62.5987	35.4508	33.8993	16.4917	17.684	5.39563	9.03775
47.04	106.942	108.54	62.006	62.5992	35.4755	33.9	16.4877	17.6845	5.40051	9.03802
48.04	106.986	108.54	62.0311	62.5996	35.5103	33.9005	16.4942	17.6848	5.40735	9.03825
49.04	107.039	108.54	62.0814	62.5999	35.531	33.9009	16.4922	17.6851	5.40771	9.03843
50.04	107.102	108.54	62.0976	62.6002	35.5517	33.9013	16.4817	17.6854	5.39703	9.03859
51.04	107.148	108.54	62.1383	62.6004	35.5869	33.9016	16.4995	17.6856	5.38263	9.03872
52.04	107.211	108.54	62.1919	62.6006	35.6521	33.9018	16.5158	17.6858	5.38397	9.03882
53.04	107.284	108.54	62.2353	62.6007	35.723	33.902	16.5388	17.6859	5.39484	9.03891
54.04	107.362	108.54	62.2444	62.6008	35.7723	33.9021	16.5511	17.6861	5.39246	9.03898
55.04	107.4	108.54	62.2879	62.6009	35.7829	33.9023	16.5442	17.6862	5.38037	9.03904
56.04	107.447	108.54	62.3286	62.601	35.8353	33.9024	16.5638	17.6862	5.36688	9.03909
57.04	107.501	108.54	62.3675	62.6011	35.861	33.9025	16.5656	17.6863	5.35223	9.03913
58.04	107.563	108.54	62.423	62.6011	35.8967	33.9025	16.5945	17.6864	5.36298	9.03917
59.04	107.655	108.541	62.4929	62.6011	35.9442	33.9026	16.6234	17.6864	5.38873	9.0392
60.04	107.745	108.541	62.5386	62.6012	35.9975	33.9026	16.6469	17.6864	5.40125	9.03922
61.04	107.831	108.541	62.5917	62.6012	36.0382	33.9027	16.649	17.6865	5.40393	9.03924
62.04	107.888	108.541	62.6363	62.6012	36.076	33.9027	16.6654	17.6865	5.39209	9.03926
63.04	107.94	108.541	62.6869	62.6012	36.0873	33.9027	16.6931	17.6865	5.39087	9.03927
64.04	108.009	108.541	62.7461	62.6012	36.0903	33.9028	16.7051	17.6865	5.39722	9.03928
65.04	108.037	108.541	62.7776	62.6012	36.1021	33.9028	16.6999	17.6866	5.38397	9.03929
66.04	108.072	108.541	62.8232	62.6013	36.1203	33.9028	16.6874	17.6866	5.38171	9.0393
67.04	108.109	108.541	62.8512	62.6013	36.1613	33.9028	16.6647	17.6866	5.36377	9.0393
68.04	108.136	108.541	62.8593	62.6013	36.1421	33.9028	16.634	17.6866	5.34344	9.03931
69.04	108.123	108.541	62.8387	62.6013	36.0937	33.9028	16.5871	17.6866	5.32977	9.03931
70.04	108.1	108.541	62.7947	62.6013	36.0229	33.9028	16.5531	17.6866	5.30029	9.03932
71.04	108.081	108.541	62.7601	62.6013	35.9782	33.9028	16.5464	17.6866	5.29437	9.03932
72.04	108.048	108.541	62.7581	62.6013	35.9278	33.9028	16.5409	17.6866	5.28131	9.03932
73.04	108.038	108.541	62.7528	62.6013	35.8857	33.9028	16.5284	17.6866	5.25653	9.03932
74.04	108.026	108.541	62.7525	62.6013	35.8324	33.9028	16.5229	17.6866	5.24316	9.03933
75.04	108.034	108.541	62.7385	62.6013	35.8031	33.9028	16.5058	17.6866	5.19855	9.03933
76.04	108.047	108.541	62.7443	62.6013	35.7618	33.9028	16.4867	17.6866	5.15582	9.03933
77.04	108.095	108.541	62.7654	62.6013	35.7641	33.9028	16.4855	17.6866	5.13245	9.03933
78.04	108.129	108.541	62.7967	62.6013	35.7406	33.9028	16.4783	17.6866	5.09723	9.03933
79.04	108.193	108.541	62.8156	62.6013	35.7308	33.9028	16.4691	17.6866	5.08105	9.03933
80.04	108.24	108.541	62.8515	62.6013	35.7315	33.9029	16.4532	17.6866	5.06311	9.03933
81.04	108.29	108.541	62.8585	62.6013	35.7511	33.9029	16.4661	17.6866	5.05634	9.03933
82.04	108.325	108.541	62.8468	62.6013	35.7356	33.9029	16.4626	17.6866	5.05835	9.03933
83.04	108.344	108.541	62.8368	62.6013	35.7413	33.9029	16.444	17.6866	5.04065	9.03933
84.04	108.383	108.541	62.8263	62.6013	35.7585	33.9029	16.457	17.6866	5.04279	9.03933
85.04	108.421	108.541	62.8232	62.6013	35.7666	33.9029	16.4569	17.6866	5.01495	9.03933
86.04	108.444	108.541	62.8289	62.6013	35.7862	33.9029	16.4674	17.6866	4.98633	9.03933
87.04	108.487	108.541	62.8395	62.6013	35.8307	33.9029	16.4721	17.6866	4.97839	9.03933
88.04	108.52	108.541	62.8638	62.6013	35.8452	33.9029	16.4651	17.6866	4.97583	9.03933
89.04	108.567	108.541	62.8835	62.6013	35.8926	33.9029	16.4717	17.6866	4.99274	9.03933
90.04	108.622	108.541	62.914	62.6013	35.9253	33.9029	16.4771	17.6866	5.01239	9.03933
91.04	108.672	108.541	62.9367	62.6013	35.9381	33.9029	16.4907	17.6866	5.02313	9.03933
92.04	108.736	108.541	62.9495	62.6013	35.9581	33.9029	16.5006	17.6866	5.04437	9.03933
93.04	108.792	108.541	62.9766	62.6013	36.0038	33.9029	16.5077	17.6866	5.0575	9.03933
94.04	108.859	108.541	63.0169	62.6013	36.0585	33.9029	16.5215	17.6866	5.05731	9.03933
95.04	108.932	108.541	63.0611	62.6013	36.0958	33.9029	16.5231	17.6866	5.09515	9.03933
96.04	109.004	108.541	63.0923	62.6013	36.1284	33.9029	16.5428	17.6866	5.09991	9.03933
97.04	109.058	108.541	63.1244	62.6013	36.146	33.9029	16.5481	17.6866	5.10492	9.03933
98.04	109.102	108.541	63.1718	62.6013	36.1526	33.9029	16.5481	17.6866	5.13422	9.03933
99.04	109.177	108.541	63.2026	62.6013	36.1985	33.9029	16.5545	17.6866	5.16534	9.03933
100.04	109.234	108.541	63.2344	62.6013	36.2562	33.9029	16.5713	17.6866	5.19714	9.03933
101.04	109.313	108.541	63.27	62.6013	36.3247	33.9029	16.5981	17.6866	5.21246	9.03933
102.04	109.382	108.541	63.2886	62.6013	36.3568	33.9029	16.6176	17.6866	5.22974	9.03933
103.04	109.445	108.541	63.3263	62.6013	36.3892	33.9029	16.6187	17.6866	5.23401	9.03933
104.04	109.507	108.541	63.3313	62.6013	36.416	33.9029	16.6207	17.6866	5.25189	9.03933
105.04	109.542	108.541	63.3487	62.6013	36.4436	33.9029	16.618	17.6866	5.25525	9.03933
106.04	109.57	108.541	63.3681	62.6013	36.4454	33.9029	16.6185	17.6866	5.27362	9.03933
107.04	109.581	108.541	63.3509	62.6013	36.4278	33.9029	16.6013	17.6866	5.26727	9.03933
108.04	109.576	108.541	63.3535	62.6013	36.4189	33.9029	16.5807	17.6866	5.26007	9.03933
109.04	109.587	108.541	63.3533	62.6013	36.4426	33.9029	16.5742	17.6866	5.24927	9.03933
110.04	109.592	108.541	63.3508	62.6013	36.4535	33.9029	16.5778	17.6866	5.2514	9.03933
111.04	109.605	108.541	63.3509	62.6013	36.4674	33.9029	16.6072	17.6866	5.27142	9.03933
112.04	109.624	108.541	63.343	62.6013	36.4566	33.9029	16.6267	17.6866	5.25293	9.03933
113.04	109.659	108.541	63.363	62.6013	36.4346	33.9029	16.6374	17.6866	5.26428	9.03933
114.04	109.673	108.541	63.3669	62.6013	36.4479	33.9029	16.6645	17.6866	5.27667	9.03933
115.04	109.669	108.541	63.3113	62.6013	36.4192	33.9029	16.6543	17.6866	5.23932	9.03933
116.04	109.629	108.541	63.2648	62.6013	36.362	33.9029	16.6139	17.6866	5.18488	9.03933
117.04	109.553	108.541	63.1793	62.6013	36.2594	33.9029	16.5515	17.6866	5.16791	9.03933
118.04	109.443	108.541	63.0502	62.6013	36.1143	33.9029	16.4964	17.6866	5.19128	9.03933
119.04	109.487	108.541	62.978	62.6013	36.0513	33.9029	16.51	17.6866	5.42365	9.03933
120.04	106.222	108.541	58.4362	57.7353	35.8247	33.9029	16.2101	17.6866	4.91943	9.03933
121.04	89.1797	91.3096	47.3592	48.0369	31.2915	29.5894	14.1038	15.155	4.39056	7.60433
122.04	71.632	75.9713	38.5495	39.9676	25.6696	24.6189	11.6022	12.6093	3.65381	6.32695
123.04	58.3453	63.2096	31.8927	33.2538	21.2795	20.4834	9.60124	10.4912	2.96899	5.26414
124.04	48.354	52.5916	26.9042	27.6678	18.0961	17.0426	8.11035	8.72885	2.47913	4.37987
125.04	40.7875	43.7572	23.0858	23.0201	15.6588	14.1798	6.98629	7.26257	2.13031	3.64413
126.04	34.8104	36.4068	19.9999	19.1532	13.6878	11.7978	6.13539	6.04259	1.79803	3.03199
127.04	30.1588	30.2912	17.635	15.9358	12.1663	9.81601	5.40241	5.02755	1.63599	2.52267
128.04	26.444	25.2028	15.6872	13.2589	11.0137	8.16711	4.86247	4.18302	1.5321	2.09891
129.04	23.4694	20.9692	14.1803	11.0317	9.97768	6.79519	4.42167	3.48035	1.37787	1.74633
130.04	21.137	17.4468	12.9903	9.17855	9.24126	5.65373	4.16084	2.89572	1.28406	1.45298
131.04	19.2147	14.5161	11.99	7.63673	8.69531	4.70401	3.88537	2.40929	1.20276	1.20891
132.04	17.6595	12.0776	11.1073	6.3539	8.13496	3.91382	3.65026	2.00458	1.12286	1.00583
133.04	16.369	10.0488	10.5026	5.28657	7.69978	3.25638	3.44414	1.66785	1.03528	0.836862
134.04	15.3176	8.36082	9.97911	4.39853	7.37698	2.70937	3.28519	1.38768	0.987122	0.69628
135.04	14.3804	6.95636	9.51473	3.65966	7.11323	2.25424	3.17443	1.15458	0.948914	0.579314
136.04	13.6191	5.78782	9.07483	3.0449	6.79175	1.87557	3.03882	0.960622	0.919434	0.481997
137.04	13.0065	4.81558	8.7236	2.53342	6.62812	1.56051	2.90758	0.79925	0.880188	0.401027
138.04	12.4523	4.00665	8.46489	2.10785	6.41335	1.29838	2.85837	0.664987	0.890137	0.33366
139.04	11.9855	3.33361	8.25451	1.75377	6.27773	1.08027	2.77848	0.553278	0.858093	0.277609
140.04	11.5571	2.77363	8.01013	1.45917	6.1178	0.898796	2.71729	0.460334	0.814819	0.230975
141.04	11.2079	2.30771	7.82157	1.21406	6.01177	0.74781	2.69496	0.383004	0.76825	0.192174
142.04	10.8903	1.92006	7.63611	1.01011	5.95691	0.622187	2.62305	0.318664	0.747559	0.159891
143.04	10.6141	1.59753	7.50962	0.840427	5.85686	0.517668	2.54341	0.265133	0.741577	0.133032
144.04	10.3894	1.32917	7.40571	0.699246	5.75095	0.430706	2.51492	0.220594	0.751831	0.110684
145.04	10.1971	1.10589	7.31038	0.581782	5.65732	0.358353	2.52871	0.183537	0.776978	0.0920905
146.04	10.0252	0.920114	7.21976	0.48405	5.57854	0.298155	2.53028	0.152705	0.773132	0.0766205
147.04	9.84674	0.765546	7.10531	0.402736	5.51301	0.248069	2.5139	0.127053	0.750061	0.0637492
148.04	9.68756	0.636945	7.02225	0.335082	5.44072	0.206396	2.46241	0.105709	0.705383	0.0530402
149.04	9.53326	0.529946	6.93448	0.278792	5.3803	0.171724	2.42311	0.0879517	0.694885	0.0441301
150.04	9.41644	0.440922	6.89012	0.231959	5.33584	0.142877	2.39603	0.0731769	0.680725	0.0367168
151.04	9.32672	0.366853	6.83539	0.192993	5.32849	0.118875	2.39691	0.0608841	0.687439	0.0305489
152.04	9.25586	0.305226	6.80535	0.160572	5.29372	0.0989059	2.37412	0.0506564	0.696655	0.0254171
153.04	9.16278	0.253952	6.75773	0.133598	5.26323	0.082291	2.339	0.0421468	0.7276	0.0211473
154.04	9.08887	0.211292	6.7188	0.111156	5.22329	0.0684672	2.33506	0.0350667	0.747314	0.0175949
155.04	9.01782	0.175797	6.66418	0.0924829	5.21948	0.0569656	2.33813	0.0291759	0.752808	0.0146391
156.04	8.92719	0.146266	6.62833	0.0769469	5.18633	0.0473961	2.34559	0.0242747	0.743835	0.01218
157.04	8.85681	0.121695	6.60161	0.0640209	5.16397	0.0394342	2.36509	0.0201969	0.758667	0.0101339
158.04	8.81531	0.101252	6.57214	0.0532662	5.11304	0.0328097	2.37622	0.0168041	0.759521	0.00843152
159.04	8.79248	0.0842428	6.57612	0.0443182	5.08872	0.0272981	2.38406	0.0139812	0.762573	0.00701514
160.04	8.76642	0.0700911	6.562	0.0368733	5.0956	0.0227124	2.39994	0.0116326	0.783875	0.00583669
161.04	8.7215	0.0583167	6.56146	0.030679	5.09558	0.018897	2.41498	0.00967844	0.7995	0.0048562
162.04	8.66797	0.0485202	6.52283	0.0255254	5.07556	0.0157226	2.40662	0.00805258	0.808472	0.00404042
163.04	8.62372	0.0403695	6.49266	0.0212374	5.04629	0.0130814	2.40018	0.00669985	0.803528	0.00336168
164.04	8.57733	0.0335879	6.48114	0.0176698	5.0155	0.0108839	2.40363	0.00557437	0.786194	0.00279696
165.04	8.52832	0.0279456	6.46194	0.0147015	5.0085	0.00905552	2.38481	0.00463794	0.765259	0.00232711
166.04	8.46783	0.0232511	6.43551	0.0122319	5.01155	0.00753431	2.36669	0.00385883	0.737244	0.00193619
167.04	8.41626	0.0193452	6.40815	0.0101771	5.00632	0.00626865	2.34341	0.0032106	0.713745	0.00161093
168.04	8.37891	0.0160955	6.38232	0.00846745	5.0116	0.00521559	2.32825	0.00267126	0.705322	0.00134032
169.04	8.32092	0.0133916	6.36138	0.00704503	4.98391	0.00433944	2.32566	0.00222252	0.687988	0.00111516
170.04	8.27271	0.011142	6.35144	0.00586155	4.95447	0.00361047	2.32849	0.00184917	0.684204	0.000927828
171.04	8.22937	0.0092703	6.33962	0.00487689	4.93037	0.00300396	2.33391	0.00153853	0.686646	0.000771965
172.04	8.19812	0.00771301	6.322	0.00405763	4.9041	0.00249933	2.3271	0.00128008	0.696411	0.000642285
173.04	8.17023	0.00641733	6.32543	0.003376	4.87771	0.00207948	2.33378	0.00106504	0.687927	0.000534389
174.04	8.15924	0.0053393	6.30814	0.00280888	4.89104	0.00173015	2.33302	0.000886128	0.699646	0.000444619
175.04	8.14069	0.00444237	6.30677	0.00233702	4.8779	0.00143951	2.32833	0.00073727	0.694031	0.000369929
176.04	8.11597	0.00369611	6.29858	0.00194443	4.86511	0.00119769	2.32532	0.000613418	0.674316	0.000307785
177.04	8.10541	0.00307521	6.28339	0.00161779	4.88318	0.000996494	2.33051	0.000510372	0.701355	0.000256081
178.04	8.10284	0.00255861	6.27572	0.00134603	4.88667	0.000829096	2.34105	0.000424636	0.701965	0.000213063
179.04	8.0871	0.0021288	6.2639	0.00111991	4.88088	0.000689819	2.33549	0.000353303	0.717468	0.000177271
180.04	8.05847	0.00177119	6.24744	0.000931781	4.88623	0.000573938	2.3429	0.000293952	0.724731	0.000147492
181.04	8.034	0.00147365	6.24332	0.000775254	4.88725	0.000477524	2.34205	0.000244572	0.723328	0.000122715
182.04	7.98206	0.0012261	6.22417	0.000645021	4.85195	0.000397306	2.32212	0.000203487	0.718628	0.000102101
183.04	7.94592	0.00102013	6.20076	0.000536666	4.81846	0.000330564	2.29153	0.000169304	0.692261	8.49491e-05
184.04	7.9248	0.00084876	6.18872	0.000446513	4.81592	0.000275033	2.29907	0.000140863	0.708618	7.06787e-05
185.04	7.91797	0.00070618	6.18616	0.000371505	4.80811	0.000228831	2.31018	0.0001172	0.716675	5.88056e-05
186.04	7.89771	0.000587551	6.18694	0.000309097	4.8146	0.000190391	2.32859	9.75119e-05	0.712769	4.8927e-05
187.04	7.87567	0.00048885	6.1986	0.000257172	4.81436	0.000158407	2.32804	8.11312e-05	0.687561	4.07079e-05
188.04	7.86926	0.000406729	6.18967	0.000213971	4.80828	0.000131797	2.32295	6.75022e-05	0.659424	3.38695e-05
189.04	7.85254	0.000338404	6.18872	0.000178026	4.80457	0.000109657	2.32996	5.61627e-05	0.654663	2.81799e-05
190.04	7.82404	0.000281557	6.18075	0.00014812	4.79622	9.12359e-05	2.32286	4.67281e-05	0.624573	2.3446e-05
191.04	7.80371	0.000234259	6.17065	0.000123238	4.7749	7.59095e-05	2.31006	3.88784e-05	0.621948	1.95074e-05
192.04	7.78876	0.000194906	6.15197	0.000102536	4.78115	6.31577e-05	2.30863	3.23473e-05	0.653015	1.62304e-05
193.04	7.77759	0.000162165	6.15061	8.5311e-05	4.77153	5.2548e-05	2.30561	2.69134e-05	0.674316	1.35039e-05
194.04	7.76953	0.000134923	6.15173	7.09799e-05	4.7655	4.37206e-05	2.30164	2.23923e-05	0.687378	1.12354e-05
195.04	7.7489	0.000112258	6.12434	5.90562e-05	4.77353	3.63761e-05	2.30606	1.86307e-05	0.68811	9.34802e-06
196.04	7.72864	9.33999e-05	6.1146	4.91355e-05	4.7531	3.02654e-05	2.29756	1.5501e-05	0.688721	7.77768e-06
197.04	7.71875	7.77099e-05	6.11902	4.08814e-05	4.75574	2.51812e-05	2.30188	1.2897e-05	0.670898	6.47113e-06
198.04	7.7135	6.46557e-05	6.11011	3.40138e-05	4.7572	2.09511e-05	2.32642	1.07305e-05	0.672607	5.38406e-06
199.04	7.69971	5.37943e-05	6.08296	2.82999e-05	4.76194	1.74316e-05	2.33535	8.92789e-06	0.650269	4.47961e-06
200.04	7.68933	4.47576e-05	6.07041	2.35459e-05	4.74175	1.45033e-05	2.31697	7.42812e-06	0.62854	3.72709e-06
201.04	7.68292	3.72389e-05	6.0484	1.95905e-05	4.71521	1.20669e-05	2.30902	6.18029e-06	0.613708	3.10099e-06
202.04	7.66809	3.09832e-05	6.05046	1.62996e-05	4.70828	1.00398e-05	2.29514	5.14208e-06	0.615479	2.58006e-06
203.04	7.64905	2.57785e-05	6.06726	1.35614e-05	4.68799	8.35328e-06	2.28296	4.27828e-06	0.617676	2.14665e-06
204.04	7.63049	2.1448e-05	6.06206	1.12833e-05	4.67898	6.95004e-06	2.27561	3.55959e-06	0.619019	1.78604e-06
205.04	7.59772	1.7845e-05	6.05319	9.38785e-06	4.65547	5.78252e-06	2.26256	2.96162e-06	0.61554	1.48601e-06
206.04	7.59631	1.48473e-05	6.07739	7.81081e-06	4.66626	4.81113e-06	2.27527	2.46411e-06	0.614136	1.23638e-06
207.04	7.59045	1.23531e-05	6.07354	6.4987e-06	4.67373	4.00293e-06	2.28	2.05017e-06	0.601685	1.02868e-06
208.04	7.58398	1.0278e-05	6.06782	5.407e-06	4.64756	3.33049e-06	2.27078	1.70577e-06	0.575684	8.55876e-07
209.04	7.54535	8.55141e-06	6.04537	4.4987e-06	4.65156	2.77101e-06	2.26329	1.41922e-06	0.551819	7.121e-07
210.04	7.54565	7.11488e-06	6.05725	3.74297e-06	4.62683	2.30551e-06	2.26062	1.18081e-06	0.528809	5.92477e-07
211.04	7.52271	5.91967e-06	6.05989	3.1142e-06	4.62302	1.91822e-06	2.26602	9.82449e-07	0.520996	4.92948e-07
212.04	7.47369	4.92525e-06	6.02272	2.59106e-06	4.62107	1.59598e-06	2.25387	8.1741e-07	0.491516	4.10139e-07
213.04	7.4566	4.09787e-06	6.01144	2.15579e-06	4.6103	1.32788e-06	2.22631	6.80096e-07	0.484192	3.41241e-07
214.04	7.44324	3.40948e-06	6.02493	1.79365e-06	4.60859	1.10481e-06	2.23223	5.65849e-07	0.490356	2.83917e-07
215.04	7.45001	2.83673e-06	6.03033	1.49234e-06	4.63	9.19218e-07	2.24701	4.70794e-07	0.520203	2.36223e-07
216.04	7.45978	2.3602e-06	6.03878	1.24164e-06	4.64509	7.64801e-07	2.25951	3.91706e-07	0.537781	1.9654e-07
217.04	7.47052	1.96371e-06	6.04904	1.03306e-06	4.66597	6.36324e-07	2.28063	3.25905e-07	0.558167	1.63524e-07
218.04	7.46466	1.63384e-06	6.04952	8.59523e-07	4.6822	5.2943e-07	2.29759	2.71157e-07	0.564026	1.36054e-07
219.04	7.46466	1.35937e-06	6.04293	7.15134e-07	4.69514	4.40493e-07	2.29881	2.25606e-07	0.581726	1.13199e-07
220.04	7.46698	1.13102e-06	6.05594	5.95001e-07	4.68791	3.66496e-07	2.30384	1.87707e-07	0.587585	9.41829e-08
221.04	7.43909	9.4102e-07	6.04216	4.95048e-07	4.67898	3.04929e-07	2.29502	1.56175e-07	0.577881	7.83614e-08
222.04	7.42365	7.82941e-07	6.01547	4.11887e-07	4.6717	2.53705e-07	2.26513	1.29939e-07	0.552429	6.51977e-08
223.04	7.40393	6.51417e-07	6.00757	3.42695e-07	4.64575	2.11086e-07	2.24097	1.08111e-07	0.54248	5.42453e-08
224.04	7.38385	5.41987e-07	6.01891	2.85127e-07	4.63308	1.75626e-07	2.24833	8.995e-08	0.542297	4.51328e-08
225.04	7.35413	4.5094e-07	6.01733	2.37229e-07	4.61487	1.46123e-07	2.24646	7.48396e-08	0.541992	3.75511e-08
226.04	7.34955	3.75188e-07	6.00973	1.97378e-07	4.63166	1.21576e-07	2.24755	6.22675e-08	0.53717	3.1243e-08
227.04	7.34747	3.12162e-07	6.0097	1.64221e-07	4.65344	1.01153e-07	2.26154	5.18074e-08	0.538269	2.59946e-08
228.04	7.33881	2.59722e-07	6.01654	1.36634e-07	4.67371	8.41608e-08	2.26031	4.31044e-08	0.554382	2.16278e-08
229.04	7.33295	2.16092e-07	6.0005	1.13681e-07	4.676	7.00228e-08	2.26669	3.58634e-08	0.549988	1.79946e-08
230.04	7.32483	1.79792e-07	6.00879	9.45842e-08	4.68347	5.82599e-08	2.26941	2.98388e-08	0.551636	1.49718e-08
231.04	7.31409	1.49589e-07	6.01238	7.86953e-08	4.67568	4.8473e-08	2.28611	2.48263e-08	0.551147	1.24567e-08
232.04	7.30634	1.2446e-07	6.02057	6.54755e-08	4.65771	4.03302e-08	2.2912	2.06558e-08	0.552673	1.03641e-08
233.04	7.31451	1.03552e-07	6.01056	5.44765e-08	4.63928	3.35552e-08	2.29022	1.71859e-08	0.559265	8.6231e-09
234.04	7.31335	8.61569e-08	6.00283	4.53251e-08	4.61311	2.79184e-08	2.30217	1.42989e-08	0.563232	7.17453e-09
235.04	7.30609	7.16837e-08	5.99657	3.77111e-08	4.60391	2.32285e-08	2.29728	1.18969e-08	0.542908	5.9693e-09
236.04	7.29315	5.96417e-08	5.98243	3.13761e-08	4.59885	1.93264e-08	2.29269	9.89834e-09	0.537903	4.96654e-09
237.04	7.28717	4.96227e-08	5.99359	2.61053e-08	4.6062	1.60798e-08	2.28265	8.23555e-09	0.546814	4.13222e-09
238.04	7.28333	4.12867e-08	5.97344	2.172e-08	4.61941	1.33786e-08	2.28684	6.85209e-09	0.533081	3.43806e-09
239.04	7.28192	3.43511e-08	5.97208	1.80713e-08	4.6386	1.11312e-08	2.30226	5.70102e-09	0.551208	2.86051e-09
240.04	7.30402	2.85806e-08	5.92794	1.50356e-08	4.62995	9.26128e-09	2.26915	4.74333e-09	0.57489	2.37998e-09

## Sheet: biotin-C3d ISG65ΔL2
Cycle: 12 ISG65dL2 5000 nM_X	Cycle: 13 ISG65dL2 5000 nM_Y	Fitted Cycle: 13 ISG65dL2 5000_Y	Cycle: 14 ISG65dL2 2500 nM_Y	Fitted Cycle: 14 ISG65dL2 2500_Y	Cycle: 15 ISG65dL2 1250 nM_Y	Fitted Cycle: 15 ISG65dL2 1250_Y	Cycle: 16 ISG65dL2 625 nM_Y	Fitted Cycle: 16 ISG65dL2 625 _Y	Cycle: 17 ISG65dL2 312.5 nM_Y	Fitted Cycle: 17 ISG65dL2 312._Y
-59.28	0.136719	0	0.164307	0	0.162476	0	0.102661	0	0.143799	0
-58.28	0.144141	0	0.158447	0	0.15271	0	0.0991455	0	0.150049	0
-57.28	0.144531	0	0.162354	0	0.140991	0	0.0889891	0	0.13208	0
-56.28	0.154297	0	0.170166	0	0.140991	0	0.0889891	0	0.122314	0
-55.28	0.152344	0	0.165283	0	0.15271	0	0.0958252	0	0.119385	0
-54.28	0.162109	0	0.162354	0	0.140991	0	0.10852	0	0.13208	0
-53.28	0.176172	0	0.187744	0	0.150757	0	0.10227	0	0.145361	0
-52.28	0.185547	0	0.193604	0	0.172241	0	0.110474	0	0.16333	0
-51.28	0.183594	0	0.188721	0	0.182007	0	0.107544	0	0.158447	0
-50.28	0.181641	0	0.164307	0	0.182007	0	0.106568	0	0.155518	0
-49.28	0.175781	0	0.142822	0	0.15271	0	0.100708	0	0.141846	0
-48.28	0.175781	0	0.152588	0	0.15271	0	0.110474	0	0.151611	0
-47.28	0.164063	0	0.157471	0	0.15271	0	0.11731	0	0.150635	0
-46.28	0.152344	0	0.147705	0	0.15271	0	0.11731	0	0.140869	0
-45.28	0.144922	0	0.143799	0	0.133179	0	0.111059	0	0.144385	0
-44.28	0.146484	0	0.154541	0	0.144897	0	0.100708	0	0.155517	0
-43.28	0.138281	0	0.189697	0	0.144897	0	0.112817	0	0.146142	0
-42.28	0.130859	0	0.186768	0	0.172241	0	0.11731	0	0.138916	0
-41.28	0.123438	0	0.173096	0	0.15271	0	0.111059	0	0.132666	0
-40.28	0.125	0	0.193604	0	0.162476	0	0.102661	0	0.143799	0
-39.28	0.126953	0	0.183838	0	0.162476	0	0.112427	0	0.153564	0
-38.28	0.228516	0	0.293213	0	0.15271	0	0.100708	0	0.153564	0
-37.28	0.153076	0	0.208008	0	0.269897	0	0.204224	0	0.249268	0
-36.28	0.146655	0	0.196106	0	0.155884	0	0.104627	0	0.11305	0
-35.28	0.140161	0	0.177734	0	0.15625	0	0.114234	0	0.110084	0
-34.28	0.0599598	0	0.0770264	0	0.0889893	0	0.087135	0	0.115333	0
-33.28	-0.0779303	0	-0.0459595	0	-0.0551758	0	-0.0356562	0	0.046253	0
-32.28	-0.145678	0	-0.0771484	0	-0.152954	0	-0.112256	0	-0.0478033	0
-31.28	-0.137744	0	-0.0699463	0	-0.140259	0	-0.0930914	0	-0.0468267	0
-30.28	-0.117748	0	-0.0597534	0	-0.131714	0	-0.0797003	0	-0.0480841	0
-29.28	-0.106079	0	-0.0445557	0	-0.103638	0	-0.0657963	0	-0.037598	0
-28.28	-0.0958737	0	-0.0518799	0	-0.10437	0	-0.0611087	0	-0.047681	0
-27.28	-0.0971434	0	-0.0605469	0	-0.103882	0	-0.0714357	0	-0.0647219	0
-26.28	-0.0981198	0	-0.0584106	0	-0.0974121	0	-0.0732059	0	-0.0515995	0
-25.28	-0.0817136	0	-0.0542603	0	-0.0777588	0	-0.0673953	0	-0.0360232	0
-24.28	-0.092285	0	-0.0386963	0	-0.0797119	0	-0.069214	0	-0.0378419	0
-23.28	-0.0937253	0	-0.0228271	0	-0.0877686	0	-0.0594729	0	-0.0248049	0
-22.28	-0.0918455	0	-0.0296021	0	-0.0793457	0	-0.0462771	0	-0.0324832	0
-21.28	-0.0820799	0	-0.041748	0	-0.0582275	0	-0.0373048	0	-0.0430422	0
-20.28	-0.0927487	0	-0.0505981	0	-0.071167	0	-0.0581912	0	-0.056116	0
-19.28	-0.0926264	0	-0.0514526	0	-0.0825195	0	-0.0559942	0	-0.0535528	0
-18.28	-0.0632318	0	-0.0404053	0	-0.0531006	0	-0.0461432	0	-0.0323492	0
-17.28	-0.026147	0	-0.0368652	0	-0.043457	0	-0.0278081	0	-0.0176763	0
-16.28	-0.0130609	0	-0.0229492	0	-0.041748	0	-0.0234381	0	0.0162348	0
-15.28	0.0114018	0	-0.0194702	0	-0.0266113	0	-0.00853318	0	0.0329707	0
-14.28	0.0283451	0	-0.00720215	0	-0.0090332	0	0.00790976	0	0.039648	0
-13.28	0.0305911	0	-0.000915527	0	-0.00585938	0	0.0154905	0	0.0292844	0
-12.28	0.0148931	0	-0.00231934	0	0.000854492	0	0.00366163	0	0.0334468	0
-11.28	0.017969	0	0.0065918	0	0.0218506	0	0.0241452	0	0.0199949	0
-10.28	0.00974154	0	0.0098877	0	0.0238037	0	0.0196774	0	0.00222135	0
-9.28003	-0.00163546	0	0.0268555	0	0.0202637	0	0.0148191	0	-0.00581083	0
-8.28003	-0.00200161	0	0.0311279	0	0.0233154	0	0.0162838	0	-0.00117221	0
-7.28003	-0.0108393	0	0.0263672	0	0.000732422	0	0.000707507	0	-0.00893605	0
-6.28003	0.00539578	0	0.0384521	0	-0.00744629	0	0.00498019	0	0.00559054	0
-5.28003	-0.00473615	0	0.0227661	0	-0.0252686	0	0.00272199	0	-0.00667743	0
-4.28003	-0.0198478	0	0.0172119	0	-0.043335	0	-0.0089608	0	-0.0068856	0
-3.28003	-0.0463119	0	0.0391235	0	-0.0693359	0	-0.00599527	0	-0.0105119	0
-2.28003	-0.0509517	0	0.0374756	0	0.000854492	0	0.00847125	0	-0.0105717	0
-1.28003	0.160055	0	0.195129	0	0.100464	0	0.149576	0	0.173136	0
-0.280029	0.551201	0	1.16577	0	0.139771	0	0.785347	0	0.826851	0
0.719971	-0.953474	3.16825	0.0494995	5.37972	-0.388428	0	-1.52217	0.724509	-1.35018	0.362582
1.71997	24.3655	25.6193	17.4857	16.2807	4.20837	5.65413	4.15356	3.67924	2.96496	1.84859
2.71997	44.1648	42.3187	27.8707	24.9438	11.3878	10.7438	6.8702	6.14691	3.83138	3.09996
3.71997	57.4442	54.7398	35.5977	31.8284	16.8954	14.9248	9.64286	8.20781	5.27018	4.15373
4.71997	65.6863	63.9787	40.9514	37.2997	20.8287	18.3593	11.6052	9.92898	6.26594	5.04111
5.71997	71.1374	70.8507	44.6362	41.6478	23.8776	21.1805	13.182	11.3664	7.1383	5.78837
6.71997	74.7847	75.962	47.3174	45.1033	26.0553	23.498	14.3693	12.5669	7.80346	6.41764
7.71997	77.4373	79.7639	49.324	47.8494	27.7318	25.4017	15.3297	13.5696	8.38467	6.94755
8.71997	79.39	82.5917	50.8947	50.0317	29.0623	26.9656	16.1819	14.4069	8.87631	7.39378
9.71997	80.8883	84.695	52.0923	51.766	30.1764	28.2501	16.838	15.1062	9.26416	7.76955
10.72	81.9893	86.2594	53.0302	53.1442	31.0083	29.3054	17.3388	15.6902	9.62481	8.08598
11.72	82.8024	87.4231	53.7697	54.2396	31.6752	30.1722	17.8108	16.178	9.96596	8.35245
12.72	83.5841	88.2886	54.3339	55.11	32.2522	30.8842	18.196	16.5853	10.2455	8.57685
13.72	84.0928	88.9324	54.7674	55.8018	32.6097	31.4692	18.4731	16.9256	10.4065	8.76581
14.72	84.5282	89.4112	55.1542	56.3515	32.95	31.9496	18.7293	17.2097	10.6066	8.92494
15.72	84.897	89.7674	55.4611	56.7884	33.2651	32.3443	18.9781	17.447	10.782	9.05894
16.72	85.1875	90.0323	55.7695	57.1356	33.5382	32.6685	19.1626	17.6452	10.9522	9.17178
17.72	85.4572	90.2293	55.9991	57.4115	33.7817	32.9349	19.3334	17.8107	11.0904	9.2668
18.72	85.6984	90.3759	56.1306	57.6307	33.9633	33.1536	19.4286	17.9489	11.2134	9.34681
19.72	85.883	90.4849	56.2675	57.805	34.0546	33.3334	19.5274	18.0643	11.3208	9.4142
20.72	86.0364	90.566	56.4384	57.9435	34.2557	33.481	19.6378	18.1607	11.3782	9.47094
21.72	86.1972	90.6263	56.6107	58.0536	34.35	33.6023	19.7136	18.2413	11.4442	9.51872
22.72	86.3452	90.6712	56.7228	58.141	34.4288	33.7019	19.8112	18.3085	11.4997	9.55895
23.72	86.4576	90.7045	56.8157	58.2105	34.5266	33.7837	19.8871	18.3647	11.5803	9.59284
24.72	86.6021	90.7293	56.9803	58.2658	34.6689	33.8509	19.9707	18.4116	11.6083	9.62137
25.72	86.7217	90.7478	57.0551	58.3096	34.7147	33.9061	20.063	18.4507	11.6303	9.6454
26.72	86.8123	90.7615	57.0884	58.3445	34.7831	33.9515	20.0997	18.4835	11.6783	9.66563
27.72	86.9066	90.7717	57.159	58.3723	34.8601	33.9887	20.1101	18.5108	11.7135	9.68267
28.72	87.0149	90.7793	57.2581	58.3943	34.9272	34.0193	20.1737	18.5336	11.7791	9.69701
29.72	87.0935	90.785	57.3387	58.4118	34.9794	34.0445	20.2272	18.5526	11.8271	9.7091
30.72	87.1454	90.7892	57.4164	58.4257	35.0609	34.0651	20.2542	18.5686	11.8724	9.71927
31.72	87.1914	90.7923	57.4518	58.4368	35.1216	34.0821	20.2645	18.5818	11.9122	9.72784
32.72	87.1963	90.7946	57.4893	58.4455	35.1511	34.096	20.2895	18.5929	11.9303	9.73505
33.72	87.2568	90.7963	57.5374	58.4525	35.1953	34.1075	20.3493	18.6022	11.9624	9.74113
34.72	87.3194	90.7976	57.5862	58.4581	35.2355	34.1169	20.4033	18.61	11.9953	9.74624
35.72	87.3605	90.7986	57.6213	58.4625	35.2816	34.1246	20.437	18.6164	12.0243	9.75055
36.72	87.3994	90.7993	57.6625	58.466	35.2914	34.131	20.4684	18.6218	12.0424	9.75418
37.72	87.5075	90.7998	57.6872	58.4688	35.318	34.1362	20.4995	18.6263	12.0836	9.75724
38.72	87.6124	90.8002	57.7366	58.471	35.3535	34.1404	20.5486	18.6301	12.1322	9.75981
39.72	87.6302	90.8005	57.8014	58.4727	35.4122	34.144	20.5725	18.6332	12.1446	9.76197
40.72	87.7026	90.8007	57.8553	58.4741	35.483	34.1469	20.6052	18.6359	12.1728	9.7638
41.72	87.7982	90.8009	57.9044	58.4752	35.5137	34.1492	20.6222	18.6381	12.175	9.76533
42.72	87.8367	90.801	57.9484	58.4761	35.5316	34.1512	20.6277	18.6399	12.1985	9.76663
43.72	87.8781	90.8011	57.98	58.4768	35.5347	34.1528	20.6603	18.6414	12.2127	9.76772
44.72	87.9321	90.8012	58.0297	58.4774	35.5726	34.1541	20.6937	18.6427	12.2364	9.76864
45.72	88.0039	90.8012	58.0633	58.4778	35.6249	34.1552	20.7323	18.6438	12.2782	9.76941
46.72	88.0318	90.8012	58.0765	58.4782	35.6555	34.1561	20.7251	18.6447	12.3042	9.77006
47.72	88.0506	90.8013	58.0864	58.4785	35.6852	34.1568	20.7311	18.6454	12.3054	9.77061
48.72	88.0942	90.8013	58.1464	58.4787	35.7067	34.1574	20.7556	18.646	12.3264	9.77107
49.72	88.1523	90.8013	58.2102	58.4789	35.7394	34.1579	20.7677	18.6466	12.3271	9.77146
50.72	88.2018	90.8013	58.2737	58.479	35.7589	34.1583	20.8069	18.647	12.3578	9.77178
51.72	88.2624	90.8013	58.3318	58.4791	35.8176	34.1586	20.8285	18.6473	12.3795	9.77206
52.72	88.2999	90.8013	58.3676	58.4792	35.8422	34.1589	20.8564	18.6476	12.4077	9.77229
53.72	88.3388	90.8013	58.3682	58.4793	35.8713	34.1591	20.8653	18.6479	12.4264	9.77249
54.72	88.3745	90.8013	58.391	58.4793	35.8944	34.1593	20.861	18.6481	12.4397	9.77265
55.72	88.432	90.8013	58.4269	58.4794	35.9055	34.1594	20.8606	18.6483	12.4802	9.77279
56.72	88.4855	90.8013	58.4949	58.4794	35.9553	34.1596	20.8798	18.6484	12.4998	9.77291
57.72	88.5233	90.8013	58.5488	58.4794	35.9926	34.1597	20.8957	18.6486	12.5251	9.773
58.72	88.5447	90.8013	58.5937	58.4795	36.0073	34.1598	20.9209	18.6487	12.5409	9.77309
59.72	88.5961	90.8013	58.6132	58.4795	36.0446	34.1598	20.9625	18.6487	12.5626	9.77316
60.72	88.6426	90.8013	58.6435	58.4795	36.037	34.1599	20.9908	18.6488	12.5714	9.77321
61.72	88.6835	90.8014	58.6895	58.4795	36.0527	34.1599	21.0167	18.6489	12.5758	9.77326
62.72	88.6914	90.8014	58.7213	58.4795	36.0902	34.16	21.0389	18.6489	12.5882	9.77331
63.72	88.7226	90.8014	58.7711	58.4795	36.1332	34.16	21.0368	18.649	12.6288	9.77334
64.72	88.766	90.8014	58.7938	58.4795	36.182	34.16	21.042	18.649	12.6256	9.77337
65.72	88.8236	90.8014	58.8425	58.4795	36.1934	34.16	21.036	18.649	12.6327	9.77339
66.72	88.8618	90.8014	58.8653	58.4795	36.2101	34.1601	21.0551	18.6491	12.6359	9.77342
67.72	88.8326	90.8014	58.8118	58.4795	36.2	34.1601	21.0572	18.6491	12.6266	9.77343
68.72	88.7528	90.8014	58.728	58.4795	36.1378	34.1601	21.0088	18.6491	12.6058	9.77345
69.72	88.6647	90.8014	58.6635	58.4795	36.0758	34.1601	20.962	18.6491	12.5607	9.77346
70.72	88.597	90.8014	58.5948	58.4795	36.0613	34.1601	20.9517	18.6491	12.555	9.77347
71.72	88.5542	90.8014	58.5571	58.4795	36.0204	34.1601	20.9224	18.6491	12.5472	9.77348
72.72	88.5672	90.8014	58.5326	58.4795	35.9301	34.1601	20.8701	18.6491	12.5293	9.77349
73.72	88.5682	90.8014	58.4959	58.4795	35.8635	34.1601	20.8211	18.6491	12.4983	9.77349
74.72	88.5705	90.8014	58.472	58.4795	35.8407	34.1601	20.7837	18.6492	12.5114	9.7735
75.72	88.5784	90.8014	58.4566	58.4795	35.8208	34.1601	20.7584	18.6492	12.5484	9.7735
76.72	88.6067	90.8014	58.4656	58.4795	35.7788	34.1601	20.7479	18.6492	12.5703	9.77351
77.72	88.6368	90.8014	58.4503	58.4795	35.7617	34.1601	20.7278	18.6492	12.5745	9.77351
78.72	88.6574	90.8014	58.4316	58.4795	35.7493	34.1601	20.7082	18.6492	12.5466	9.77351
79.72	88.6894	90.8014	58.4232	58.4795	35.7539	34.1601	20.7093	18.6492	12.5201	9.77352
80.72	88.6942	90.8014	58.4075	58.4795	35.7117	34.1601	20.684	18.6492	12.495	9.77352
81.72	88.6874	90.8014	58.4059	58.4795	35.6788	34.1601	20.6444	18.6492	12.4848	9.77352
82.72	88.6941	90.8014	58.393	58.4795	35.656	34.1601	20.6234	18.6492	12.4867	9.77352
83.72	88.7216	90.8014	58.3964	58.4795	35.6449	34.1601	20.6029	18.6492	12.4773	9.77352
84.72	88.7461	90.8014	58.393	58.4795	35.6527	34.1601	20.5861	18.6492	12.4691	9.77352
85.72	88.7811	90.8014	58.3808	58.4795	35.646	34.1601	20.5622	18.6492	12.4546	9.77352
86.72	88.7993	90.8014	58.3751	58.4795	35.615	34.1601	20.5349	18.6492	12.4175	9.77352
87.72	88.806	90.8014	58.3816	58.4795	35.5844	34.1601	20.5101	18.6492	12.3927	9.77352
88.72	88.8283	90.8014	58.3655	58.4795	35.5664	34.1601	20.4698	18.6492	12.3625	9.77352
89.72	88.8482	90.8014	58.3793	58.4795	35.5336	34.1601	20.4543	18.6492	12.345	9.77353
90.72	88.8829	90.8014	58.3971	58.4795	35.53	34.1601	20.4404	18.6492	12.3425	9.77353
91.72	88.9149	90.8014	58.4126	58.4795	35.5269	34.1601	20.4404	18.6492	12.3425	9.77353
92.72	88.9447	90.8014	58.4395	58.4795	35.525	34.1601	20.4274	18.6492	12.3479	9.77353
93.72	88.9619	90.8014	58.4468	58.4795	35.5153	34.1601	20.4048	18.6492	12.3252	9.77353
94.72	88.9667	90.8014	58.446	58.4795	35.4989	34.1601	20.3857	18.6492	12.2963	9.77353
95.72	88.9856	90.8014	58.4413	58.4795	35.4796	34.1601	20.3558	18.6492	12.2758	9.77353
96.72	89.0046	90.8014	58.4338	58.4795	35.468	34.1601	20.347	18.6492	12.2463	9.77353
97.72	89.0295	90.8014	58.4385	58.4795	35.4711	34.1601	20.3502	18.6492	12.2507	9.77353
98.72	89.05	90.8014	58.4487	58.4795	35.4781	34.1601	20.3477	18.6492	12.2501	9.77353
99.72	89.0895	90.8014	58.4544	58.4795	35.4696	34.1601	20.3435	18.6492	12.2623	9.77353
100.72	89.127	90.8014	58.4706	58.4795	35.4698	34.1601	20.3383	18.6492	12.2601	9.77353
101.72	89.1511	90.8014	58.4887	58.4795	35.46	34.1601	20.3406	18.6492	12.2708	9.77353
102.72	89.1773	90.8014	58.5146	58.4795	35.45	34.1601	20.3271	18.6492	12.2768	9.77353
103.72	89.2017	90.8014	58.5311	58.4795	35.4515	34.1601	20.3108	18.6492	12.264	9.77353
104.72	89.2457	90.8014	58.5374	58.4795	35.45	34.1601	20.3027	18.6492	12.2478	9.77353
105.72	89.2564	90.8014	58.5488	58.4795	35.4418	34.1601	20.2854	18.6492	12.2351	9.77353
106.72	89.268	90.8014	58.5524	58.4795	35.4384	34.1601	20.2738	18.6492	12.2088	9.77353
107.72	89.2946	90.8014	58.5531	58.4795	35.4288	34.1601	20.2662	18.6492	12.1963	9.77353
108.72	89.3105	90.8014	58.5834	58.4795	35.437	34.1601	20.2791	18.6492	12.1946	9.77353
109.72	89.3591	90.8014	58.5982	58.4795	35.468	34.1601	20.3072	18.6492	12.218	9.77353
110.72	89.389	90.8014	58.6194	58.4795	35.4797	34.1601	20.327	18.6492	12.249	9.77353
111.72	89.4361	90.8014	58.6453	58.4795	35.4908	34.1601	20.3379	18.6492	12.2696	9.77353
112.72	89.4595	90.8014	58.6788	58.4795	35.5121	34.1601	20.3464	18.6492	12.2786	9.77353
113.72	89.4745	90.8014	58.6774	58.4795	35.5106	34.1601	20.3347	18.6492	12.2859	9.77353
114.72	89.4815	90.8014	58.6641	58.4795	35.4941	34.1601	20.311	18.6492	12.2561	9.77353
115.72	89.4918	90.8014	58.6431	58.4795	35.4629	34.1601	20.3009	18.6492	12.2408	9.77353
116.72	89.4916	90.8014	58.6233	58.4795	35.4387	34.1601	20.3077	18.6492	12.2297	9.77353
117.72	89.479	90.8014	58.5955	58.4795	35.4648	34.1601	20.2766	18.6492	12.2362	9.77353
118.72	89.4538	90.8014	58.6711	58.4795	35.4648	34.1601	20.3534	18.6492	12.3097	9.77353
119.72	89.6068	90.8014	59.6011	58.4795	35.4764	34.1601	19.9441	18.6492	12.0009	9.77353
120.72	85.4036	89.0363	51.8261	54.5966	35.4384	34.1601	19.6689	18.2867	11.7648	9.42809
121.72	67.5729	75.5997	42.0967	46.3575	28.756	29.872	15.6328	15.5272	9.65098	8.00533
122.72	54.6894	64.191	34.3124	39.3618	23.6334	25.3641	12.9864	13.184	8.2755	6.79728
123.72	44.7165	54.504	28.3607	33.4218	19.4301	21.5364	10.954	11.1945	7.10295	5.77153
124.72	37.2843	46.2788	24.0162	28.3782	16.3751	18.2864	9.30058	9.50514	6.31584	4.90057
125.72	31.6405	39.295	20.6032	24.0957	14.068	15.5269	8.15667	8.07075	5.73065	4.16104
126.72	27.2753	33.365	17.9542	20.4595	12.2211	13.1838	7.26112	6.85283	5.25416	3.53312
127.72	23.7386	28.33	15.8311	17.372	10.7853	11.1943	6.56112	5.81869	4.90145	2.99995
128.72	20.9423	24.0548	14.1758	14.7505	9.72156	9.50498	5.98207	4.94062	4.5868	2.54724
129.72	18.7702	20.4248	12.8677	12.5245	8.8457	8.07062	5.56639	4.19505	4.33604	2.16285
130.72	16.9996	17.3425	11.7965	10.6345	8.18872	6.85271	5.23638	3.56199	4.15508	1.83646
131.72	15.5082	14.7254	10.8478	9.02967	7.57422	5.8186	4.90493	3.02447	3.93594	1.55933
132.72	14.3039	12.5033	10.1055	7.66704	7.07422	4.94054	4.66752	2.56806	3.78397	1.32401
133.72	13.3506	10.6164	9.57971	6.51004	6.63367	4.19498	4.45002	2.18052	3.69184	1.1242
134.72	12.5494	9.01435	9.09229	5.52763	6.35864	3.56193	4.28359	1.85147	3.62197	0.95455
135.72	11.8385	7.65402	8.61761	4.69348	6.03979	3.02442	4.0972	1.57207	3.45243	0.810499
136.72	11.2412	6.49899	8.19189	3.98521	5.80469	2.56801	3.90627	1.33483	3.31704	0.688187
137.72	10.7326	5.51825	7.89954	3.38381	5.55127	2.18049	3.81868	1.13339	3.2718	0.584333
138.72	10.3384	4.68551	7.64124	2.87318	5.40723	1.85144	3.70449	0.962351	3.26992	0.496152
139.72	9.92615	3.97844	7.40375	2.4396	5.20313	1.57204	3.58636	0.817123	3.12945	0.421278
140.72	9.62117	3.37807	7.27386	2.07145	5.02063	1.33481	3.52501	0.693811	3.08763	0.357703
141.72	9.36958	2.8683	7.08459	1.75885	4.97925	1.13337	3.476	0.589109	3.08306	0.303722
142.72	9.08552	2.43546	6.8927	1.49343	4.88794	0.962336	3.36748	0.500206	3.02788	0.257887
143.72	8.87686	2.06793	6.789	1.26806	4.78516	0.81711	3.32706	0.42472	2.97794	0.21897
144.72	8.71101	1.75587	6.66388	1.0767	4.74219	0.6938	3.33776	0.360626	2.93627	0.185925
145.72	8.53843	1.4909	6.58484	0.914213	4.70496	0.589099	3.33498	0.306204	2.94997	0.157867
146.72	8.40789	1.26591	6.49335	0.776249	4.70032	0.500198	3.30629	0.259995	2.94081	0.134044
147.72	8.25051	1.07487	6.36493	0.659106	4.62988	0.424713	3.22233	0.220759	2.89786	0.113815
148.72	8.1366	0.912661	6.23511	0.55964	4.52002	0.36062	3.15723	0.187445	2.85034	0.0966393
149.72	7.99934	0.774932	6.1781	0.475185	4.44836	0.306199	3.1342	0.159157	2.82109	0.0820555
150.72	7.89338	0.657987	6.14966	0.403475	4.39929	0.259991	3.12139	0.135139	2.79521	0.0696725
151.72	7.77854	0.55869	6.08093	0.342587	4.35193	0.220756	3.08474	0.114745	2.76504	0.0591583
152.72	7.72568	0.474379	6.0105	0.290887	4.3114	0.187441	3.05447	0.097429	2.746	0.0502307
153.72	7.64873	0.40279	5.9231	0.24699	4.28979	0.159155	3.04206	0.0827261	2.70588	0.0426504
154.72	7.55772	0.342005	5.85803	0.209716	4.25391	0.135137	3.02187	0.0702419	2.69546	0.0362141
155.72	7.47861	0.290393	5.82013	0.178068	4.24927	0.114743	2.99154	0.0596417	2.69442	0.030749
156.72	7.38621	0.24657	5.78809	0.151196	4.20349	0.0974274	2.9584	0.0506412	2.68276	0.0261087
157.72	7.29495	0.20936	5.76135	0.128379	4.14099	0.0827247	2.92344	0.042999	2.64426	0.0221686
158.72	7.22705	0.177766	5.7132	0.109005	4.11328	0.0702408	2.91534	0.03651	2.6264	0.0188232
159.72	7.16799	0.150939	5.65369	0.0925555	4.08716	0.0596407	2.90342	0.0310003	2.59653	0.0159826
160.72	7.11458	0.128161	5.58588	0.078588	4.06958	0.0506404	2.90697	0.0263221	2.57103	0.0135707
161.72	7.04126	0.10882	5.56964	0.0667283	4.03699	0.0429983	2.88434	0.0223498	2.5661	0.0115227
162.72	6.98733	0.0923984	5.56207	0.0566584	4.03674	0.0365094	2.8704	0.018977	2.58182	0.00978382
163.72	6.9282	0.0784546	5.52722	0.0481081	4.04175	0.0309998	2.86782	0.0161132	2.59219	0.00830735
164.72	6.8677	0.066615	5.49695	0.0408481	4.0321	0.0263216	2.8563	0.0136816	2.56894	0.00705369
165.72	6.83616	0.0565622	5.45251	0.0346837	3.99756	0.0223494	2.85159	0.0116169	2.55276	0.00598922
166.72	6.81795	0.0480264	5.42236	0.0294496	3.98096	0.0189767	2.85369	0.00986378	2.55669	0.00508539
167.72	6.80125	0.0407787	5.40283	0.0250054	3.96472	0.0161129	2.83791	0.00837524	2.55911	0.00431796
168.72	6.77241	0.0346248	5.38861	0.0212318	3.95203	0.0136813	2.83971	0.00711134	2.58202	0.00366634
169.72	6.76064	0.0293996	5.37427	0.0180277	3.93396	0.0116167	2.84727	0.00603817	2.58799	0.00311305
170.72	6.72146	0.0249629	5.35345	0.0153072	3.92871	0.00986362	2.84257	0.00512695	2.5767	0.00264326
171.72	6.68943	0.0211958	5.32721	0.0129972	3.91882	0.0083751	2.86129	0.00435324	2.56771	0.00224437
172.72	6.6751	0.0179971	5.3158	0.0110358	3.92224	0.00711122	2.85762	0.0036963	2.56904	0.00190567
173.72	6.60964	0.0152812	5.29645	0.00937038	3.901	0.00603807	2.84977	0.00313849	2.55448	0.00161809
174.72	6.57502	0.0129751	5.26764	0.0079563	3.89136	0.00512687	2.833	0.00266486	2.55382	0.0013739
175.72	6.52791	0.011017	5.2561	0.00675562	3.86987	0.00435317	2.8001	0.00226271	2.53423	0.00116657
176.72	6.51528	0.00935447	5.23309	0.00573613	3.85986	0.00369624	2.79545	0.00192124	2.51969	0.000990521
177.72	6.49651	0.00794279	5.21112	0.00487049	3.83594	0.00313844	2.77638	0.00163131	2.49257	0.000841042
178.72	6.45752	0.00674415	5.18073	0.00413549	3.82458	0.00266482	2.75372	0.00138513	2.48151	0.00071412
179.72	6.44177	0.00572639	5.17719	0.0035114	3.84094	0.00226267	2.75482	0.0011761	2.47601	0.000606353
180.72	6.41387	0.00486222	5.15027	0.0029815	3.82373	0.00192121	2.74885	0.000998616	2.47322	0.000514848
181.72	6.36851	0.00412847	5.11511	0.00253156	3.81445	0.00163128	2.74148	0.000847915	2.46084	0.000437153
182.72	6.33828	0.00350544	5.0744	0.00214952	3.81287	0.00138511	2.72733	0.000719956	2.43863	0.000371182
183.72	6.30322	0.00297644	5.0423	0.00182514	3.77185	0.00117608	2.71429	0.000611308	2.42682	0.000315167
184.72	6.28508	0.00252726	5.01129	0.00154971	3.78162	0.000998599	2.70631	0.000519056	2.4286	0.000267605
185.72	6.23962	0.00214588	4.9942	0.00131584	3.75232	0.000847901	2.67718	0.000440725	2.40155	0.000227221
186.72	6.20176	0.00182204	4.96655	0.00111727	3.73755	0.000719945	2.68069	0.000374216	2.3937	0.000192931
187.72	6.16728	0.00154708	4.95258	0.000948663	3.71472	0.000611298	2.66383	0.000317743	2.37684	0.000163816
188.72	6.1155	0.00131361	4.909	0.000805501	3.68201	0.000519047	2.6348	0.000269792	2.35599	0.000139095
189.72	6.0946	0.00111537	4.8775	0.000683943	3.6626	0.000440718	2.61554	0.000229078	2.34662	0.000118104
190.72	6.07039	0.000947053	4.87891	0.000580729	3.64124	0.000374209	2.60112	0.000194508	2.35332	0.000100281
191.72	6.04605	0.000804133	4.86023	0.000493092	3.63953	0.000317738	2.60459	0.000165155	2.34727	8.51476e-05
192.72	6.01751	0.000682782	4.84381	0.00041868	3.62463	0.000269788	2.59095	0.000140231	2.31996	7.2298e-05
193.72	6.00544	0.000579744	4.82526	0.000355497	3.62036	0.000229074	2.59569	0.000119069	2.3087	6.13876e-05
194.72	5.98679	0.000492255	4.81213	0.000301849	3.62183	0.000194505	2.58645	0.000101101	2.30728	5.21236e-05
195.72	5.97024	0.000417969	4.77917	0.000256297	3.60156	0.000165152	2.58079	8.58435e-05	2.30356	4.42576e-05
196.72	5.94587	0.000354893	4.75238	0.000217619	3.57263	0.000140229	2.56566	7.28889e-05	2.28844	3.75787e-05
197.72	5.93281	0.000301336	4.70416	0.000184778	3.5531	0.000119067	2.55858	6.18892e-05	2.2849	3.19077e-05
198.72	5.8947	0.000255862	4.66156	0.000156894	3.51367	0.000101099	2.54164	5.25496e-05	2.26442	2.70926e-05
199.72	5.84998	0.00021725	4.61841	0.000133217	3.49097	8.58421e-05	2.51648	4.46193e-05	2.24243	2.3004e-05
200.72	5.83638	0.000184465	4.61176	0.000113113	3.51013	7.28877e-05	2.51024	3.78858e-05	2.23961	1.95325e-05
201.72	5.81353	0.000156627	4.59552	9.60433e-05	3.50732	6.18882e-05	2.51246	3.21685e-05	2.22511	1.65849e-05
202.72	5.78396	0.000132991	4.58459	8.15494e-05	3.49683	5.25487e-05	2.51084	2.7314e-05	2.19736	1.4082e-05
203.72	5.75862	0.000112921	4.58575	6.92428e-05	3.49097	4.46186e-05	2.50963	2.3192e-05	2.19017	1.19569e-05
204.72	5.75293	9.58803e-05	4.56177	5.87934e-05	3.5011	3.78852e-05	2.51306	1.96921e-05	2.18359	1.01525e-05
205.72	5.72632	8.1411e-05	4.55042	4.99209e-05	3.47266	3.2168e-05	2.50623	1.67204e-05	2.16028	8.6204e-06
206.72	5.70845	6.91253e-05	4.5506	4.23874e-05	3.47961	2.73135e-05	2.50157	1.41971e-05	2.16417	7.3195e-06
207.72	5.71397	5.86936e-05	4.53815	3.59907e-05	3.4906	2.31916e-05	2.50655	1.20546e-05	2.16537	6.21492e-06
208.72	5.69341	4.98362e-05	4.51312	3.05594e-05	3.46448	1.96918e-05	2.50221	1.02355e-05	2.16444	5.27703e-06
209.72	5.64973	4.23154e-05	4.49988	2.59477e-05	3.42224	1.67201e-05	2.48821	8.69085e-06	2.1574	4.48067e-06
210.72	5.63435	3.59296e-05	4.49402	2.20319e-05	3.43054	1.41969e-05	2.48552	7.37932e-06	2.15569	3.8045e-06
211.72	5.60466	3.05075e-05	4.47699	1.87071e-05	3.42419	1.20544e-05	2.4684	6.26571e-06	2.14857	3.23036e-06
212.72	5.55461	2.59036e-05	4.45197	1.5884e-05	3.40112	1.02353e-05	2.45216	5.32015e-06	2.12416	2.74287e-06
213.72	5.51377	2.19945e-05	4.43213	1.3487e-05	3.3844	8.69071e-06	2.42263	4.51729e-06	2.12087	2.32894e-06
214.72	5.48416	1.86753e-05	4.40222	1.14517e-05	3.37036	7.3792e-06	2.38975	3.83559e-06	2.11057	1.97748e-06
215.72	5.4448	1.5857e-05	4.38074	9.72349e-06	3.35852	6.2656e-06	2.39297	3.25676e-06	2.09817	1.67906e-06
216.72	5.41455	1.34641e-05	4.36658	8.25612e-06	3.3634	5.32006e-06	2.37512	2.76528e-06	2.09595	1.42568e-06
217.72	5.40518	1.14322e-05	4.37122	7.01019e-06	3.34216	4.51722e-06	2.37363	2.34798e-06	2.09763	1.21053e-06
218.72	5.38687	9.70698e-06	4.37097	5.95229e-06	3.3407	3.83552e-06	2.36594	1.99364e-06	2.10862	1.02785e-06
219.72	5.36624	8.2421e-06	4.36646	5.05403e-06	3.34216	3.25671e-06	2.36936	1.69278e-06	2.11472	8.72735e-07
220.72	5.32834	6.99829e-06	4.36176	4.29133e-06	3.3241	2.76524e-06	2.36312	1.43733e-06	2.10531	7.41031e-07
221.72	5.29619	5.94218e-06	4.34149	3.64373e-06	3.30469	2.34794e-06	2.34254	1.22042e-06	2.06495	6.29202e-07
222.72	5.24805	5.04545e-06	4.31128	3.09385e-06	3.27344	1.99361e-06	2.33252	1.03625e-06	2.04675	5.3425e-07
223.72	5.23765	4.28404e-06	4.28674	2.62696e-06	3.26404	1.69276e-06	2.32656	8.79867e-07	2.03945	4.53626e-07
224.72	5.22341	3.63754e-06	4.27509	2.23053e-06	3.25891	1.4373e-06	2.3212	7.47087e-07	2.03727	3.8517e-07
225.72	5.20398	3.0886e-06	4.26575	1.89392e-06	3.25073	1.2204e-06	2.31299	6.34344e-07	2.03381	3.27044e-07
226.72	5.1825	2.6225e-06	4.24573	1.60811e-06	3.24072	1.03623e-06	2.32092	5.38616e-07	2.02563	2.7769e-07
227.72	5.16482	2.22674e-06	4.22522	1.36543e-06	3.23083	8.79853e-07	2.31162	4.57333e-07	2.02439	2.35784e-07
228.72	5.14534	1.8907e-06	4.20721	1.15937e-06	3.21326	7.47075e-07	2.30529	3.88317e-07	2.03478	2.00202e-07
229.72	5.13533	1.60538e-06	4.1889	9.84412e-07	3.2196	6.34334e-07	2.30492	3.29717e-07	2.02428	1.69989e-07
230.72	5.12187	1.36311e-06	4.16833	8.35855e-07	3.22314	5.38607e-07	2.28962	2.79959e-07	2.02388	1.44336e-07
231.72	5.09607	1.1574e-06	4.14862	7.09716e-07	3.20337	4.57326e-07	2.26312	2.37711e-07	1.99921	1.22555e-07
232.72	5.08455	9.82741e-07	4.1297	6.02613e-07	3.20154	3.88311e-07	2.25389	2.01838e-07	1.98827	1.0406e-07
233.72	5.0738	8.34436e-07	4.12738	5.11673e-07	3.19995	3.29711e-07	2.26122	1.71379e-07	1.98705	8.83563e-08
234.72	5.05525	7.08512e-07	4.11859	4.34457e-07	3.20325	2.79955e-07	2.25414	1.45516e-07	1.9785	7.50225e-08
235.72	5.04539	6.0159e-07	4.09064	3.68893e-07	3.20386	2.37707e-07	2.25399	1.23556e-07	1.967	6.37008e-08
236.72	5.03535	5.10805e-07	4.08093	3.13224e-07	3.1936	2.01835e-07	2.24126	1.0491e-07	1.96233	5.40878e-08
237.72	5.01064	4.33719e-07	4.04883	2.65955e-07	3.16052	1.71376e-07	2.22727	8.90783e-08	1.94968	4.59254e-08
238.72	4.98608	3.68267e-07	4.02368	2.2582e-07	3.12341	1.45513e-07	2.21362	7.56356e-08	1.9165	3.89948e-08
239.72	4.96809	3.12692e-07	4.00897	1.91742e-07	3.1134	1.23554e-07	2.19408	6.42214e-08	1.9088	3.31101e-08
240.72	4.94089	2.65504e-07	3.98999	1.62806e-07	3.10217	1.04909e-07	2.19753	5.45298e-08	1.90237	2.81135e-08
					3.08081	8.90769e-08

## Sheet: biotin-C3b ISG65L2N188A etc.
Cycle: 15 ISG65L2ala 5000 nM_X	Cycle: 16 ISG65L2ala 5000 nM_Y	Fitted Cycle: 16 ISG65L2ala 50_Y	Cycle: 17 ISG65L2ala 2500 nM_Y	Fitted Cycle: 17 ISG65L2ala 25_Y	Cycle: 18 ISG65L2ala 1250 nM_Y	Fitted Cycle: 18 ISG65L2ala 12_Y	Cycle: 19 ISG65L2ala 625 nM_Y	Fitted Cycle: 19 ISG65L2ala 62_Y	Cycle: 20 ISG65L2ala 312.5 nM_Y	Fitted Cycle: 20 ISG65L2ala 31_Y
-60.26	-0.420871	0	-0.593656	0	0.0371094	0	-0.254679	0	-0.243692	0
-59.26	-0.338445	0	-0.771785	0	-0.374023	0	-0.306228	0	-0.303054	0
-58.26	0.0849886	0	-0.206937	0	-0.0136719	0	-0.0632715	0	-0.0620508	0
-57.26	0.240456	0	0.00087738	0	0.119141	0	0.0203176	0	-0.00775862	0
-56.26	0.209987	0	-0.0936537	0	0.166992	0	0.0949254	0	0.0551305	0
-55.26	-0.0986052	0	-0.273343	0	-0.145508	0	-0.153115	0	-0.222207	0
-54.26	0.0396757	0	-0.142093	0	-0.0263672	0	-0.0449138	0	-0.153068	0
-53.26	0.107644	0	-0.0206075	0	0.0537109	0	-0.0226502	0	-0.160101	0
-52.26	0.197487	0	0.0477524	0	0.115234	0	-0.00311995	0	-0.12104	0
-51.26	0.262721	0	0.111425	0	0.196289	0	0.0441432	0	-0.0229955	0
-50.26	0.276	0	0.111817	0	0.166992	0	0.0820303	0	-0.0769053	0
-49.26	0.281468	0	0.18838	0	0.178711	0	0.155074	0	0.0762167	0
-48.26	0.0525641	0	-0.1042	0	0.0800781	0	-0.00820112	0	-0.0968242	0
-47.26	0.0978775	0	-0.0772476	0	0.0371094	0	-0.0558548	0	-0.105415	0
-46.26	0.0709229	0	0.0571289	0	0.0478516	0	-0.0839844	0	-0.104248	0
-45.26	-0.235713	0	-0.466314	0	-0.236328	0	-0.142562	0	-0.201888	0
-44.26	-0.155637	0	-0.519046	0	-0.317383	0	-0.294913	0	-0.213614	0
-43.26	0.368186	0	0.349709	0	0.386719	0	0.258978	0	-0.0601134	0
-42.26	-0.377119	0	-0.662798	0	-0.412109	0	-0.174202	0	-0.202279	0
-41.26	0.402171	0	0.317678	0	0.37793	0	0.185151	0	0.0965276	0
-40.26	0.289673	0	0.129395	0	0.171875	0	0.0781255	0	0.0402837	0
-39.26	0.322876	0	0.186035	0	0.173828	0	0.0312493	0	0.0227044	0
-38.26	0.315845	0	0.241894	0	0.192383	0	0.0218749	0	0.00356436	0
-37.26	0.328735	0	0.266113	0	0.208008	0	0.0449216	0	0.024658	0
-36.26	0.00461078	0	0.00954938	0	-0.0457153	0	-0.3348	0	0.0985494	0
-35.26	-0.0102997	0	-0.273026	0	-0.112061	0	-0.111832	0	-0.0957189	0
-34.26	-0.037133	0	-0.0608895	0	-0.00152588	0	-0.0810034	0	-0.0310767	0
-33.26	-0.04724	0	-0.0314953	0	-0.00262451	0	-0.0711634	0	-0.0109828	0
-32.26	-0.345091	0	-0.0522475	0	-0.0976563	0	-0.0667684	0	0.0853312	0
-31.26	0.0107696	0	-0.196683	0	-0.118103	0	-0.0406892	0	-0.143228	0
-30.26	0.0819819	0	0.0913579	0	0.0346069	0	0.029515	0	0.058934	0
-29.26	-0.0726068	0	-0.0821784	0	-0.105042	0	-0.0391092	0	-0.00700474	0
-28.26	-0.0996082	0	-0.101686	0	-0.111694	0	-0.0629849	0	-0.0262418	0
-27.26	-0.101342	0	-0.0849376	0	-0.106628	0	-0.090158	0	-0.0220428	0
-26.26	-0.108373	0	-0.0896251	0	-0.10614	0	-0.0308073	0	0.0345004	0
-25.26	-0.117017	0	-0.0156735	0	-0.100891	0	-0.0577158	0	-0.0796884	0
-24.26	-0.0792964	0	-0.0334966	0	-0.117065	0	-0.097386	0	-0.0597883	0
-23.26	-0.0544182	0	-0.0776619	0	-0.118225	0	-0.116746	0	-0.0338601	0
-22.26	-0.0718499	0	-0.0969733	0	-0.119507	0	-0.127659	0	-0.0447735	0
-21.26	-0.101464	0	-0.131446	0	-0.134521	0	-0.15742	0	-0.0745345	0
-20.26	-0.126904	0	-0.135914	0	-0.132568	0	-0.131565	0	-0.0862772	0
-19.26	-0.122143	0	-0.120411	0	-0.117432	0	-0.0949441	0	-0.0789529	0
-18.26	-0.08684	0	-0.108595	0	-0.0649414	0	-0.0805885	0	-0.0630103	0
-17.26	-0.0499504	0	-0.101295	0	-0.045105	0	-0.0531713	0	-0.0453588	0
-16.26	-0.0441641	0	-0.079249	0	-0.0236206	0	-0.0270237	0	-0.025803	0
-15.26	-0.0277336	0	-0.0679696	0	-0.0238037	0	-0.0222877	0	-0.05073	0
-14.26	-0.0274406	0	-0.0753426	0	-0.0446167	0	-0.00773692	0	-0.0436256	0
-13.26	-0.0380119	0	-0.0777107	0	-0.0551758	0	0.0108422	0	-0.0287086	0
-12.26	-0.0487542	0	-0.0752693	0	-0.0737915	0	-0.0107645	0	-0.039329	0
-11.26	-0.0555656	0	-0.0859139	0	-0.0731812	0	-0.00458744	0	-0.0573218	0
-10.26	-0.0507317	0	-0.0730476	0	-0.0688477	0	-0.0190163	0	-0.0406228	0
-9.26001	-0.0634025	0	-0.07649	0	-0.0819702	0	-0.0228493	0	-0.013694	0
-8.26001	-0.0640373	0	-0.0776863	0	-0.081604	0	-0.0390357	0	-0.00998296	0
-7.26001	-0.0537833	0	-0.0775644	0	-0.0648804	0	-0.043552	0	-0.0060764	0
-6.26001	-0.0440423	0	-0.0630133	0	-0.0576782	0	-0.0583965	0	0.0116719	0
-5.26001	-0.0742425	0	-0.072486	0	-0.0602417	0	-0.0572002	0	0.00456738	0
-4.26001	-0.127979	0	-0.129956	0	-0.106689	0	-0.121485	0	-0.0304207	0
-3.26001	0.0676779	0	-0.0183614	0	0.0305176	0	0.0899965	0	0.10257	0
-2.26001	-0.112496	0	-0.280204	0	-0.257874	0	-0.126795	0	-0.11886	0
-1.26001	0.119828	0	-0.00886559	0	0.0271606	0	0.0518653	0	0.0729835	0
-0.26001	1.09026	0	-0.0953913	0	-0.221497	0	0.32133	0	-0.0680747	0
0.73999	17.2723	15.7586	7.60541	6.1851	4.18671	3.56457	2.9688	2.36827	1.00395	1.18634
1.73999	34.8274	31.2598	16.9497	14.5476	8.44482	7.75008	5.31175	4.39761	2.16832	2.2068
2.73999	48.6004	43.8499	25.2965	21.5508	12.952	11.3093	7.64164	6.13652	3.4268	3.08457
3.73999	58.502	54.0757	31.3718	27.4156	16.2797	14.3358	9.30799	7.62657	4.40724	3.8396
4.73999	65.7943	62.3812	35.9487	32.327	18.8199	16.9095	10.5402	8.90337	5.14051	4.48905
5.73999	71.4086	69.127	39.5438	36.44	20.9636	19.098	11.6829	9.99745	5.79664	5.04769
6.73999	75.7519	74.6059	42.4628	39.8845	22.6165	20.9591	12.4805	10.9349	6.32152	5.52822
7.73999	79.0874	79.056	44.7201	42.769	23.9383	22.5416	13.152	11.7383	6.75071	5.94155
8.73999	81.7536	82.6703	46.5602	45.1847	25.0189	23.8873	13.7342	12.4266	7.14171	6.29709
9.73999	83.8719	85.606	48.026	47.2076	25.9197	25.0317	14.2794	13.0165	7.51527	6.60291
10.74	85.6125	87.9903	49.2807	48.9017	26.743	26.0048	14.7487	13.5219	7.7869	6.86598
11.74	86.995	89.9268	50.2966	50.3205	27.4155	26.8322	15.1561	13.955	8.05445	7.09226
12.74	88.1352	91.4997	51.131	51.5086	27.9739	27.5359	15.5007	14.3261	8.30733	7.2869
13.74	89.0175	92.7772	51.7985	52.5036	28.4254	28.1342	15.7773	14.6441	8.47925	7.45432
14.74	89.751	93.8148	52.3292	53.3368	28.7997	28.6431	15.9613	14.9166	8.58853	7.59833
15.74	90.3429	94.6576	52.8061	54.0346	29.1036	29.0757	16.122	15.1501	8.67522	7.7222
16.74	90.8581	95.3421	53.2355	54.6189	29.3986	29.4437	16.2931	15.3502	8.83689	7.82876
17.74	91.3224	95.898	53.5608	55.1083	29.6613	29.7565	16.4509	15.5217	8.97994	7.92041
18.74	91.7104	96.3496	53.8544	55.5181	29.8679	30.0226	16.5811	15.6686	9.07251	7.99924
19.74	92.0415	96.7163	54.1132	55.8613	30.0426	30.2488	16.7237	15.7945	9.14322	8.06706
20.74	92.3775	97.0142	54.3382	56.1487	30.2429	30.4412	16.8654	15.9023	9.25909	8.12539
21.74	92.6579	97.2561	54.5707	56.3894	30.4261	30.6048	16.9788	15.9948	9.36089	8.17556
22.74	92.922	97.4526	54.7918	56.591	30.6155	30.7439	17.0685	16.074	9.45523	8.21872
23.74	93.1458	97.6122	55.0075	56.7598	30.7634	30.8622	17.1133	16.1418	9.50516	8.25584
24.74	93.3688	97.7419	55.1771	56.9012	30.8647	30.9628	17.1891	16.2	9.56592	8.28777
25.74	93.5228	97.8472	55.3482	57.0196	30.9705	31.0484	17.2402	16.2498	9.62701	8.31524
26.74	93.6577	97.9327	55.4795	57.1187	31.065	31.1211	17.29	16.2925	9.68689	8.33887
27.74	93.3557	98.0021	55.6097	57.2017	31.1628	31.1829	17.3501	16.3291	9.75643	8.35919
28.74	93.4946	98.0585	55.7573	57.2713	31.2588	31.2355	17.398	16.3605	9.81436	8.37667
29.74	93.8755	98.1044	55.8557	57.3295	31.3339	31.2803	17.46	16.3873	9.85298	8.39171
30.74	94.1834	98.1416	55.954	57.3782	31.4179	31.3183	17.5407	16.4103	9.89812	8.40464
31.74	94.3208	98.1718	56.0489	57.4191	31.4851	31.3506	17.6137	16.4301	9.92022	8.41576
32.74	94.4197	98.1963	56.1389	57.4533	31.5424	31.3781	17.6485	16.447	9.90738	8.42533
33.74	94.5057	98.2163	56.208	57.4819	31.6283	31.4015	17.7006	16.4615	9.96978	8.43356
34.74	94.6038	98.2325	56.3097	57.5059	31.7047	31.4214	17.7599	16.4739	10.0322	8.44065
35.74	94.7044	98.2456	56.4118	57.526	31.7697	31.4383	17.7857	16.4845	10.0645	8.44674
36.74	94.7683	98.2563	56.4866	57.5428	31.8047	31.4527	17.7867	16.4936	10.0868	8.45197
37.74	94.8265	98.265	56.5505	57.5569	31.8386	31.4649	17.8125	16.5014	10.1144	8.45648
38.74	94.8779	98.272	56.5863	57.5687	31.8635	31.4753	17.8246	16.5081	10.1344	8.46036
39.74	94.9336	98.2777	56.6286	57.5785	31.8732	31.4842	17.8377	16.5138	10.1491	8.46369
40.74	95.0036	98.2824	56.6466	57.5868	31.915	31.4917	17.8733	16.5188	10.1783	8.46656
41.74	95.0381	98.2862	56.7168	57.5937	31.9745	31.4981	17.9021	16.523	10.1926	8.46902
42.74	95.1048	98.2892	56.7613	57.5995	32.0258	31.5035	17.9445	16.5266	10.2104	8.47115
43.74	95.1741	98.2917	56.8046	57.6044	32.0513	31.5082	17.9527	16.5297	10.2347	8.47297
44.74	95.2145	98.2938	56.8377	57.6085	32.0724	31.5121	17.9617	16.5323	10.2538	8.47454
45.74	95.2549	98.2954	56.8812	57.6119	32.1036	31.5154	17.9794	16.5346	10.2731	8.47589
46.74	95.2862	98.2967	56.9328	57.6147	32.1398	31.5183	17.9961	16.5365	10.2862	8.47705
47.74	95.3244	98.2978	56.9715	57.6171	32.1675	31.5207	18.0067	16.5382	10.3133	8.47805
48.74	95.3772	98.2987	57.0137	57.6191	32.2042	31.5227	18.0441	16.5396	10.3438	8.47891
49.74	95.4486	98.2994	57.0762	57.6208	32.2393	31.5245	18.0657	16.5408	10.3852	8.47965
50.74	95.499	98.3	57.1105	57.6222	32.2571	31.526	18.1114	16.5419	10.418	8.48029
51.74	95.5416	98.3005	57.1251	57.6234	32.2781	31.5272	18.1292	16.5428	10.4408	8.48083
52.74	95.5709	98.3008	57.1743	57.6244	32.3038	31.5283	18.1408	16.5436	10.4622	8.48131
53.74	95.6009	98.3012	57.2099	57.6252	32.3202	31.5292	18.1418	16.5442	10.4991	8.48171
54.74	95.6394	98.3014	57.2314	57.6259	32.3387	31.53	18.153	16.5448	10.5115	8.48206
55.74	95.6985	98.3016	57.2769	57.6264	32.3665	31.5307	18.1703	16.5453	10.5387	8.48236
56.74	95.7332	98.3018	57.3295	57.6269	32.3895	31.5312	18.1672	16.5457	10.5376	8.48261
57.74	95.7774	98.3019	57.3666	57.6273	32.432	31.5317	18.1891	16.546	10.55	8.48284
58.74	95.7971	98.302	57.3859	57.6277	32.4633	31.5321	18.2441	16.5463	10.5687	8.48303
59.74	95.8298	98.3021	57.4103	57.628	32.4885	31.5325	18.2783	16.5466	10.5997	8.48319
60.74	95.8558	98.3022	57.4597	57.6282	32.4918	31.5328	18.2772	16.5468	10.6085	8.48333
61.74	95.8995	98.3022	57.5126	57.6284	32.5173	31.533	18.287	16.547	10.6346	8.48345
62.74	95.9621	98.3023	57.56	57.6286	32.5786	31.5332	18.3207	16.5472	10.6895	8.48356
63.74	96.0225	98.3023	57.6105	57.6287	32.629	31.5334	18.346	16.5473	10.7331	8.48365
64.74	96.0658	98.3024	57.6566	57.6288	32.6517	31.5336	18.3424	16.5474	10.762	8.48372
65.74	96.0916	98.3024	57.6883	57.6289	32.6779	31.5337	18.3407	16.5476	10.7519	8.48379
66.74	96.1322	98.3024	57.7375	57.629	32.7255	31.5338	18.3453	16.5476	10.7661	8.48385
67.74	96.1422	98.3024	57.7597	57.6291	32.7593	31.5339	18.341	16.5477	10.7639	8.4839
68.74	96.1332	98.3024	57.7685	57.6291	32.7883	31.534	18.355	16.5478	10.7856	8.48394
69.74	96.1275	98.3025	57.7761	57.6292	32.8184	31.534	18.3825	16.5478	10.8051	8.48398
70.74	96.1337	98.3025	57.8097	57.6292	32.8367	31.5341	18.4032	16.5479	10.8341	8.48401
71.74	96.1277	98.3025	57.858	57.6293	32.869	31.5341	18.4477	16.5479	10.8866	8.48403
72.74	96.0892	98.3025	57.8637	57.6293	32.86	31.5342	18.4693	16.548	10.9064	8.48406
73.74	96.0458	98.3025	57.8501	57.6293	32.8585	31.5342	18.4695	16.548	10.8969	8.48408
74.74	96.0154	98.3025	57.8282	57.6293	32.849	31.5343	18.4816	16.548	10.9058	8.48409
75.74	96.0002	98.3025	57.8192	57.6293	32.8674	31.5343	18.5022	16.548	10.9529	8.48411
76.74	96.0267	98.3025	57.8252	57.6294	32.8915	31.5343	18.5475	16.5481	10.9799	8.48412
77.74	96.0531	98.3025	57.8398	57.6294	32.9155	31.5343	18.5744	16.5481	10.9891	8.48413
78.74	96.0778	98.3025	57.8375	57.6294	32.9493	31.5343	18.608	16.5481	11.0049	8.48414
79.74	96.1138	98.3025	57.8444	57.6294	32.9794	31.5343	18.6309	16.5481	11.0278	8.48415
80.74	96.1404	98.3025	57.8605	57.6294	32.9777	31.5344	18.6434	16.5481	11.0402	8.48416
81.74	96.1667	98.3025	57.8664	57.6294	32.9638	31.5344	18.6593	16.5481	11.0378	8.48416
82.74	96.1927	98.3025	57.896	57.6294	32.9686	31.5344	18.6918	16.5481	11.0689	8.48417
83.74	96.2719	98.3025	57.9614	57.6294	32.9967	31.5344	18.7371	16.5481	11.132	8.48417
84.74	96.3462	98.3025	58.0289	57.6294	33.0391	31.5344	18.7794	16.5481	11.1776	8.48418
85.74	96.418	98.3025	58.0847	57.6294	33.066	31.5344	18.8095	16.5481	11.2043	8.48418
86.74	96.4696	98.3025	58.1191	57.6294	33.1051	31.5344	18.8474	16.5481	11.2456	8.48418
87.74	96.522	98.3025	58.1667	57.6294	33.1298	31.5344	18.8802	16.5482	11.2863	8.48418
88.74	96.5839	98.3025	58.2126	57.6294	33.173	31.5344	18.9005	16.5482	11.3195	8.48419
89.74	96.6562	98.3025	58.2532	57.6294	33.2093	31.5344	18.9129	16.5482	11.3158	8.48419
90.74	96.7388	98.3025	58.3129	57.6294	33.2133	31.5344	18.9174	16.5482	11.3009	8.48419
91.74	96.8139	98.3025	58.3645	57.6294	33.223	31.5344	18.9313	16.5482	11.3036	8.48419
92.74	96.8937	98.3025	58.427	57.6294	33.2227	31.5344	18.9268	16.5482	11.2943	8.48419
93.74	96.9604	98.3025	58.4895	57.6294	33.2551	31.5344	18.9473	16.5482	11.3243	8.48419
94.74	97.0455	98.3025	58.5791	57.6294	33.2628	31.5344	18.9848	16.5482	11.3555	8.48419
95.74	97.1141	98.3025	58.639	57.6294	33.2906	31.5344	19.0072	16.5482	11.3857	8.48419
96.74	97.1913	98.3025	58.7182	57.6294	33.304	31.5344	19.0204	16.5482	11.4169	8.4842
97.74	97.2324	98.3025	58.7683	57.6294	33.321	31.5344	19.0407	16.5482	11.4228	8.4842
98.74	97.2322	98.3025	58.7814	57.6294	33.3174	31.5344	19.0389	16.5482	11.426	8.4842
99.74	97.2328	98.3025	58.7807	57.6294	33.3018	31.5344	19.0542	16.5482	11.4312	8.4842
100.74	97.2292	98.3025	58.7891	57.6294	33.2891	31.5344	19.0566	16.5482	11.4219	8.4842
101.74	97.207	98.3025	58.7788	57.6294	33.2775	31.5344	19.0571	16.5482	11.4065	8.4842
102.74	97.1878	98.3025	58.77	57.6294	33.262	31.5344	19.0512	16.5482	11.3973	8.4842
103.74	97.1781	98.3025	58.7817	57.6294	33.2524	31.5344	19.0513	16.5482	11.3856	8.4842
104.74	97.1845	98.3025	58.785	57.6294	33.2563	31.5344	19.0578	16.5482	11.3824	8.4842
105.74	97.2029	98.3025	58.8158	57.6294	33.2522	31.5344	19.0852	16.5482	11.4111	8.4842
106.74	97.2134	98.3025	58.8479	57.6294	33.2502	31.5344	19.1148	16.5482	11.4379	8.4842
107.74	97.2304	98.3025	58.8668	57.6294	33.2571	31.5344	19.1396	16.5482	11.4248	8.4842
108.74	97.2301	98.3025	58.8761	57.6294	33.2586	31.5344	19.164	16.5482	11.4461	8.4842
109.74	97.222	98.3025	58.8811	57.6294	33.2595	31.5344	19.177	16.5482	11.4609	8.4842
110.74	97.1779	98.3025	58.879	57.6294	33.2404	31.5344	19.1593	16.5482	11.4151	8.4842
111.74	97.0686	98.3025	58.8318	57.6294	33.194	31.5344	19.1188	16.5482	11.3972	8.4842
112.74	96.9713	98.3025	58.7893	57.6294	33.151	31.5344	19.1035	16.5482	11.4065	8.4842
113.74	96.8498	98.3025	58.7751	57.6294	33.108	31.5344	19.0719	16.5482	11.4152	8.4842
114.74	96.7049	98.3025	58.7348	57.6294	33.0516	31.5344	18.992	16.5482	11.3667	8.4842
115.74	96.568	98.3025	58.7378	57.6294	33.0375	31.5344	18.9255	16.5482	11.3902	8.4842
116.74	96.4612	98.3025	58.7989	57.6294	33.0534	31.5344	18.8451	16.5482	11.4766	8.4842
117.74	96.4279	98.3025	58.8679	57.6294	33.1069	31.5344	18.8302	16.5482	11.5285	8.4842
118.74	96.4091	98.3025	58.8973	57.6294	33.1285	31.5344	18.8201	16.5482	11.4583	8.4842
119.74	95.0276	98.3025	58.2635	57.6294	31.7286	31.5344	18.1025	16.5482	10.9216	8.4842
120.74	85.7431	88.1833	53.8236	52.4617	31.4659	28.7067	17.2435	14.4152	10.5227	7.39062
121.74	70.7917	76.1434	44.7325	45.2989	25.4805	24.7872	14.2976	12.447	8.97706	6.38156
122.74	59.2476	65.7473	37.6809	39.1141	21.6535	21.403	12.3843	10.7476	7.9676	5.51026
123.74	50.1897	56.7706	32.2882	33.7737	18.632	18.4807	10.8317	9.28019	7.18452	4.75793
124.74	43.0535	49.0195	27.9509	29.1625	16.3229	15.9575	9.67258	8.01314	6.56882	4.10831
125.74	37.2475	42.3267	24.5124	25.1808	14.4315	13.7788	8.77165	6.91908	6.06389	3.54739
126.74	32.5529	36.5477	21.6887	21.7428	12.8527	11.8975	7.94717	5.97439	5.69534	3.06305
127.74	28.7166	31.5577	19.39	18.7742	11.5603	10.2731	7.30561	5.15869	5.36555	2.64484
128.74	25.534	27.249	17.4355	16.2109	10.5705	8.87048	6.74453	4.45436	5.08401	2.28373
129.74	22.9031	23.5286	15.8641	13.9976	9.66968	7.65937	6.26455	3.84619	4.80837	1.97193
130.74	20.7003	20.3162	14.5276	12.0864	8.96375	6.61361	5.84795	3.32105	4.64495	1.70269
131.74	18.9506	17.5424	13.4437	10.4362	8.41467	5.71063	5.56602	2.86762	4.46445	1.47021
132.74	17.3837	15.1472	12.5322	9.01134	7.87396	4.93094	5.28547	2.47609	4.30305	1.26947
133.74	16.0009	13.0791	11.7135	7.78099	7.3877	4.2577	5.06868	2.13802	4.16145	1.09615
134.74	14.924	11.2934	11.0112	6.71863	6.96515	3.67638	4.83857	1.84611	4.07527	0.946483
135.74	13.9393	9.75147	10.4286	5.80131	6.6098	3.17443	4.66648	1.59405	3.97031	0.817254
136.74	13.0189	8.42007	9.90796	5.00924	6.29694	2.74102	4.50146	1.37641	3.82141	0.705669
137.74	12.2956	7.27045	9.44866	4.32531	6.10077	2.36678	4.34397	1.18848	3.69993	0.60932
138.74	11.6672	6.27779	9.05239	3.73476	5.8761	2.04363	4.21331	1.02621	3.65129	0.526126
139.74	11.1882	5.42066	8.69658	3.22484	5.6925	1.76461	4.11716	0.886094	3.63511	0.454291
140.74	10.7374	4.68056	8.45313	2.78454	5.5722	1.52368	4.08655	0.76511	3.60889	0.392264
141.74	10.3837	4.04151	8.19602	2.40436	5.49811	1.31564	4.02803	0.660645	3.58003	0.338706
142.74	9.9969	3.48971	7.97722	2.07608	5.36798	1.13601	3.9636	0.570443	3.53696	0.29246
143.74	9.70532	3.01325	7.79016	1.79263	5.23236	0.980902	3.91125	0.492557	3.49707	0.252529
144.74	9.37869	2.60184	7.63303	1.54787	5.10718	0.846974	3.8509	0.425305	3.45491	0.21805
145.74	9.11865	2.2466	7.47156	1.33653	4.99048	0.731331	3.80164	0.367236	3.45825	0.188278
146.74	8.92097	1.93986	7.33147	1.15405	4.89752	0.631478	3.73374	0.317095	3.46067	0.162571
147.74	8.75315	1.675	7.22354	0.996478	4.8208	0.545259	3.69573	0.2738	3.43535	0.140374
148.74	8.56416	1.4463	7.15252	0.860423	4.77301	0.470811	3.65684	0.236417	3.38523	0.121208
149.74	8.35769	1.24883	7.04014	0.742944	4.70453	0.406529	3.59993	0.204137	3.33796	0.104659
150.74	8.17256	1.07832	6.91607	0.641506	4.61639	0.351023	3.54026	0.176265	3.30124	0.0903693
151.74	7.99983	0.931092	6.80657	0.553917	4.54047	0.303096	3.49277	0.152199	3.2916	0.0780306
152.74	7.92397	0.803965	6.6959	0.478287	4.48401	0.261712	3.47969	0.131418	3.25984	0.0673767
153.74	7.85166	0.694195	6.59829	0.412984	4.45135	0.225979	3.45073	0.113475	3.24138	0.0581773
154.74	7.76418	0.599412	6.52915	0.356597	4.44073	0.195125	3.45613	0.0979814	3.22847	0.050234
155.74	7.65073	0.517571	6.50186	0.307909	4.41815	0.168483	3.45562	0.0846034	3.22478	0.0433753
156.74	7.58941	0.446904	6.4864	0.265868	4.39392	0.145479	3.48025	0.073052	3.23342	0.037453
157.74	7.52964	0.385885	6.47073	0.229567	4.36554	0.125616	3.48333	0.0630778	3.22161	0.0323393
158.74	7.45996	0.333198	6.42944	0.198223	4.33533	0.108465	3.45081	0.0544654	3.20862	0.0279238
159.74	7.4144	0.287705	6.4042	0.171159	4.30975	0.0936556	3.42888	0.0470289	3.20134	0.0241112
160.74	7.33972	0.248423	6.36487	0.147789	4.2688	0.0808683	3.39392	0.0406078	3.19275	0.0208192
161.74	7.30408	0.214504	6.33521	0.127611	4.24219	0.0698268	3.37219	0.0350634	3.18201	0.0179766
162.74	7.27817	0.185216	6.2991	0.110187	4.21613	0.060293	3.38616	0.030276	3.19475	0.0155222
163.74	7.24138	0.159928	6.27717	0.0951428	4.18433	0.0520608	3.37197	0.0261422	3.18533	0.0134028
164.74	7.17891	0.138092	6.24956	0.0821524	4.18445	0.0449526	3.36082	0.0225728	3.1616	0.0115729
165.74	7.11692	0.119237	6.21194	0.0709356	4.17456	0.038815	3.35149	0.0194908	3.15825	0.00999275
166.74	7.03831	0.102957	6.19058	0.0612504	4.15472	0.0335154	3.33489	0.0168296	3.12712	0.00862838
167.74	6.98874	0.0888998	6.16043	0.0528875	4.14276	0.0289393	3.34172	0.0145318	3.12066	0.0074503
168.74	6.94707	0.0767618	6.12861	0.0456665	4.13342	0.024988	3.34805	0.0125477	3.13833	0.00643306
169.74	6.89167	0.0662811	6.08916	0.0394313	4.14197	0.0215763	3.35044	0.0108345	3.14304	0.00555472
170.74	6.83987	0.0572313	6.05295	0.0340475	4.12872	0.0186303	3.34358	0.00935518	3.15034	0.0047963
171.74	6.81455	0.0494172	6.0209	0.0293988	4.11255	0.0160866	3.33196	0.00807786	3.15825	0.00414143
172.74	6.80652	0.04267	6.00452	0.0253848	4.08691	0.0138902	3.30237	0.00697494	3.15991	0.00357598
173.74	6.78054	0.036844	5.96543	0.0219189	4.06604	0.0119937	3.27131	0.00602261	3.15193	0.00308773
174.74	6.76365	0.0318135	5.93814	0.0189262	4.03455	0.0103561	3.26763	0.00520031	3.14824	0.00266614
175.74	6.73706	0.0274698	5.91846	0.0163421	4.02478	0.00894216	3.26929	0.00449028	3.14819	0.00230212
176.74	6.68586	0.0237192	5.9096	0.0141108	4.00452	0.00772123	3.26328	0.00387719	3.13364	0.0019878
177.74	6.65786	0.0204806	5.89048	0.0121842	3.99335	0.006667	3.28633	0.00334782	3.10274	0.00171639
178.74	6.64468	0.0176843	5.87571	0.0105206	4.00153	0.00575672	3.29756	0.00289072	3.07966	0.00148204
179.74	6.63369	0.0152698	5.87559	0.00908415	3.98981	0.00497072	3.28779	0.00249603	3.08784	0.00127969
180.74	6.64087	0.0131849	5.88245	0.00784384	3.99878	0.00429204	3.27576	0.00215524	3.08911	0.00110497
181.74	6.61938	0.0113847	5.87598	0.00677287	4.00037	0.00370602	3.26599	0.00186097	3.08911	0.000954099
182.74	6.58625	0.00983026	5.87505	0.00584813	3.99316	0.00320002	3.25779	0.00160688	3.10044	0.00082383
183.74	6.55877	0.00848808	5.852	0.00504965	3.97498	0.0027631	3.23867	0.00138748	3.08169	0.000711348
184.74	6.53335	0.00732915	5.8314	0.00436019	3.96838	0.00238584	3.23921	0.00119804	3.05244	0.000614223
185.74	6.50537	0.00632846	5.79456	0.00376487	3.95068	0.00206008	3.24829	0.00103447	3.05811	0.00053036
186.74	6.49158	0.0054644	5.80518	0.00325083	3.93848	0.00177881	3.24963	0.000893224	3.07581	0.000457946
187.74	6.4834	0.00471831	5.8114	0.00280697	3.94006	0.00153594	3.24792	0.000771267	3.07739	0.00039542
188.74	6.5238	0.00407409	5.82031	0.00242372	3.94147	0.00132623	3.27014	0.000665961	3.10816	0.000341431
189.74	6.54006	0.00351783	5.84751	0.0020928	3.93591	0.00114515	3.27791	0.000575033	3.12727	0.000294814
190.74	6.56128	0.00303752	5.85791	0.00180705	3.96375	0.000988795	3.29175	0.000496521	3.15271	0.000254561
191.74	6.58084	0.00262279	5.85935	0.00156033	3.97681	0.000853789	3.30635	0.000428728	3.1656	0.000219804
192.74	6.54692	0.00226468	5.83906	0.00134729	3.98169	0.000737216	3.30679	0.000370191	3.17715	0.000189793
193.74	6.49685	0.00195547	5.82261	0.00116333	3.95496	0.00063656	3.2917	0.000319647	3.1667	0.000163879
194.74	6.47363	0.00168848	5.81335	0.0010045	3.94861	0.000549646	3.30347	0.000276003	3.16919	0.000141504
195.74	6.43254	0.00145794	5.80464	0.000867346	3.9342	0.0004746	3.29763	0.000238319	3.16165	0.000122184
196.74	6.39373	0.00125888	5.77607	0.000748923	3.90759	0.0004098	3.29226	0.00020578	3.15103	0.000105501
197.74	6.35952	0.001087	5.75889	0.000646668	3.90887	0.000353848	3.27827	0.000177684	3.13069	9.10965e-05
198.74	6.34077	0.000938584	5.75481	0.000558374	3.90076	0.000305535	3.28611	0.000153423	3.14512	7.86585e-05
199.74	6.33228	0.000810434	5.75513	0.000482136	3.90625	0.000263818	3.28735	0.000132476	3.14636	6.79188e-05
200.74	6.34314	0.000699781	5.74072	0.000416307	3.91693	0.000227798	3.28796	0.000114388	3.14697	5.86455e-05
201.74	6.34343	0.000604235	5.7386	0.000359466	3.88184	0.000196695	3.26418	9.87698e-05	3.1365	5.06383e-05
202.74	6.31226	0.000521736	5.72742	0.000310386	3.86053	0.000169839	3.24487	8.52842e-05	3.12695	4.37243e-05
203.74	6.29226	0.0004505	5.6998	0.000268007	3.83136	0.00014665	3.22761	7.36398e-05	3.11592	3.77544e-05
204.74	6.25286	0.00038899	5.66719	0.000231415	3.80811	0.000126627	3.20303	6.35854e-05	3.08474	3.25995e-05
205.74	6.23115	0.000335879	5.66411	0.000199818	3.77789	0.000109338	3.19102	5.49037e-05	3.08286	2.81485e-05
206.74	6.21604	0.00029002	5.64871	0.000172536	3.78156	9.44093e-05	3.19756	4.74074e-05	3.07146	2.43052e-05
207.74	6.21836	0.000250422	5.63821	0.000148979	3.78253	8.1519e-05	3.20012	4.09345e-05	3.06426	2.09867e-05
208.74	6.19312	0.00021623	5.61768	0.000128638	3.76947	7.03887e-05	3.19287	3.53455e-05	3.03857	1.81213e-05
209.74	6.19028	0.000186707	5.60098	0.000111074	3.7644	6.07781e-05	3.19951	3.05196e-05	3.01287	1.56471e-05
210.74	6.19006	0.000161215	5.61621	9.59084e-05	3.76367	5.24797e-05	3.22461	2.63526e-05	3.02002	1.35107e-05
211.74	6.16531	0.000139203	5.62131	8.28135e-05	3.7674	4.53144e-05	3.24678	2.27545e-05	3.00935	1.1666e-05
212.74	6.14392	0.000120197	5.62744	7.15064e-05	3.7699	3.91273e-05	3.24646	1.96477e-05	3.00745	1.00732e-05
213.74	6.14153	0.000103786	5.62019	6.17432e-05	3.76843	3.3785e-05	3.23635	1.69651e-05	3.01528	8.69781e-06
214.74	6.12061	8.96152e-05	5.6189	5.33131e-05	3.78503	2.91722e-05	3.24463	1.46487e-05	3.03369	7.51025e-06
215.74	6.11685	7.73795e-05	5.6124	4.60339e-05	3.78479	2.51891e-05	3.23896	1.26486e-05	3.03901	6.48483e-06
216.74	6.10508	6.68144e-05	5.59524	3.97486e-05	3.77209	2.17499e-05	3.21733	1.09217e-05	3.03887	5.59942e-06
217.74	6.09895	5.76919e-05	5.58501	3.43215e-05	3.75787	1.87803e-05	3.20994	9.43046e-06	3.03306	4.83489e-06
218.74	6.08564	4.98148e-05	5.57988	2.96354e-05	3.7348	1.62161e-05	3.20676	8.14286e-06	3.02671	4.17476e-06
219.74	6.07488	4.30133e-05	5.55146	2.55891e-05	3.70575	1.4002e-05	3.17446	7.03107e-06	3.01357	3.60475e-06
220.74	6.04385	3.71405e-05	5.52683	2.20953e-05	3.6795	1.20902e-05	3.14412	6.07107e-06	2.99372	3.11257e-06
221.74	6.03381	3.20695e-05	5.50562	1.90785e-05	3.66846	1.04395e-05	3.13672	5.24215e-06	2.99731	2.6876e-06
222.74	6.03452	2.76908e-05	5.49356	1.64736e-05	3.66785	9.01411e-06	3.13359	4.52641e-06	3.01372	2.32064e-06
223.74	6.01631	2.391e-05	5.47783	1.42243e-05	3.66003	7.78336e-06	3.12046	3.90839e-06	3.0106	2.00379e-06
224.74	6.00434	2.06455e-05	5.46868	1.22822e-05	3.64844	6.72065e-06	3.11472	3.37476e-06	2.98972	1.7302e-06
225.74	6.00947	1.78266e-05	5.45317	1.06052e-05	3.63611	5.80304e-06	3.11607	2.91398e-06	2.98032	1.49397e-06
226.74	6.0273	1.53926e-05	5.46489	9.15725e-06	3.6319	5.01072e-06	3.13352	2.51612e-06	3.00266	1.28999e-06
227.74	6.04995	1.3291e-05	5.46091	7.90695e-06	3.63538	4.32658e-06	3.1363	2.17258e-06	2.99544	1.11386e-06
228.74	6.07969	1.14763e-05	5.47573	6.82737e-06	3.65155	3.73584e-06	3.15398	1.87594e-06	2.9865	9.61776e-07
229.74	6.1252	9.90936e-06	5.48955	5.89519e-06	3.66748	3.22577e-06	3.18272	1.61981e-06	2.99644	8.30459e-07
230.74	6.1395	8.55638e-06	5.48647	5.09028e-06	3.685	2.78533e-06	3.21636	1.39865e-06	2.99566	7.17072e-07
231.74	6.15464	7.38813e-06	5.49758	4.39528e-06	3.69257	2.40503e-06	3.2199	1.20768e-06	2.98088	6.19166e-07
232.74	6.15527	6.37938e-06	5.49854	3.79516e-06	3.69141	2.07666e-06	3.22998	1.04279e-06	2.95325	5.34627e-07
233.74	6.15974	5.50837e-06	5.50395	3.27699e-06	3.70221	1.79312e-06	3.24277	9.00411e-07	2.94712	4.61631e-07
234.74	6.14805	4.75628e-06	5.51321	2.82956e-06	3.71155	1.5483e-06	3.24114	7.77473e-07	2.94036	3.98602e-07
235.74	6.13662	4.10687e-06	5.50583	2.44322e-06	3.71954	1.3369e-06	3.25435	6.7132e-07	2.93831	3.44179e-07
236.74	6.1231	3.54614e-06	5.51472	2.10964e-06	3.73413	1.15436e-06	3.25381	5.79661e-07	2.93997	2.97186e-07
237.74	6.14014	3.06196e-06	5.50757	1.8216e-06	3.73334	9.96752e-07	3.26917	5.00516e-07	2.94373	2.56609e-07
238.74	6.11086	2.64389e-06	5.47812	1.57288e-06	3.73407	8.60659e-07	3.26912	4.32178e-07	2.91413	2.21573e-07
239.74	6.07895	2.28291e-06	5.47085	1.35813e-06	3.73572	7.43148e-07	3.28106	3.7317e-07	2.86882	1.9132e-07

## Sheet: biotin-C3d ISG65L2N188A etc.
Cycle: 23 ISG65L2ala 5000 nM_X	Cycle: 23 ISG65L2ala 5000 nM_Y	Fitted Cycle: 23 ISG65L2ala 50_Y	Cycle: 24 ISG65L2ala 2500 nM_Y	Fitted Cycle: 24 ISG65L2ala 25_Y	Cycle: 25 ISG65L2ala 1250 nM_Y	Fitted Cycle: 25 ISG65L2ala 12_Y	Cycle: 26 ISG65L2ala 625 nM_Y	Fitted Cycle: 26 ISG65L2ala 62_Y	Cycle: 27 ISG65L2ala 312.5 nM_Y	Fitted Cycle: 27 ISG65L2ala 31_Y
-59.86	-0.239639	0	-0.156524	0	-0.0974729	0	-0.115722	0	-0.22528	0
-58.86	-0.213272	0	-0.137969	0	-0.113098	0	-0.0903313	0	-0.209655	0
-57.86	-0.200577	0	-0.13504	0	-0.117004	0	-0.0766598	0	-0.195984	0
-56.86	-0.183975	0	-0.126251	0	-0.12677	0	-0.0708001	0	-0.180358	0
-55.86	-0.190811	0	-0.105743	0	-0.12091	0	-0.0766598	0	-0.16864	0
-54.86	-0.207413	0	-0.126251	0	-0.124817	0	-0.0844727	0	-0.164734	0
-53.86	-0.192373	0	-0.126446	0	-0.135754	0	-0.0813469	0	-0.161608	0
-52.86	-0.207413	0	-0.145782	0	-0.142395	0	-0.0922852	0	-0.162781	0
-51.86	-0.206436	0	-0.12918	0	-0.130676	0	-0.0844716	0	-0.154967	0
-50.86	-0.210342	0	-0.127228	0	-0.118957	0	-0.064941	0	-0.156921	0
-49.86	-0.203506	0	-0.137969	0	-0.115051	0	-0.0493157	0	-0.160827	0
-48.86	-0.207413	0	-0.145782	0	-0.105286	0	-0.0629883	0	-0.184265	0
-47.86	-0.231827	0	-0.156524	0	-0.101379	0	-0.0571285	0	-0.16864	0
-46.86	-0.238663	0	-0.165314	0	-0.105286	0	-0.0629883	0	-0.184265	0
-45.86	-0.255264	0	-0.174103	0	-0.118958	0	-0.0786136	0	-0.229187	0
-44.86	-0.248428	0	-0.175079	0	-0.144348	0	-0.102051	0	-0.242859	0
-43.86	-0.256827	0	-0.173321	0	-0.153332	0	-0.122363	0	-0.251453	0
-42.86	-0.266006	0	-0.175079	0	-0.181458	0	-0.121582	0	-0.260437	0
-41.86	-0.260538	0	-0.168048	0	-0.188098	0	-0.136425	0	-0.267468	0
-40.86	-0.254287	0	-0.159454	0	-0.185363	0	-0.150878	0	-0.262389	0
-39.86	-0.245108	0	-0.14793	0	-0.174816	0	-0.139941	0	-0.241686	0
-38.86	-0.246084	0	-0.168438	0	-0.161144	0	-0.132128	0	-0.214342	0
-37.86	-0.206124	0	-0.0846426	0	-0.147082	0	-0.159862	0	-0.179576	0
-36.86	0.657318	0	0.774719	0	0.0032351	0	-0.119629	0	-0.180053	0
-35.86	0.662289	0	0.694246	0	0.774194	0	0.626432	0	0.302488	0
-34.86	0.338446	0	0.123394	0	0.395016	0	0.187746	0	0.0612358	0
-33.86	-0.472728	0	-0.27841	0	0.113214	0	0.0039122	0	-0.172922	0
-32.86	-0.353317	0	-0.351286	0	-0.549742	0	-0.475645	0	-0.357084	0
-31.86	0.0419772	0	0.132233	0	-0.170013	0	-0.129714	0	-0.22084	0
-30.86	0.0163446	0	0.00434605	0	0.131826	0	0.0955045	0	0.0219572	0
-29.86	-0.092884	0	-0.081642	0	-0.0422438	0	-0.0257223	0	-0.0949667	0
-28.86	-0.133317	0	-0.089961	0	-0.0985746	0	-0.0682187	0	-0.141919	0
-27.86	-0.116335	0	-0.0527392	0	-0.0865069	0	-0.07505	0	-0.12133	0
-26.86	-0.0375718	0	0.0261747	0	0.000341587	0	-0.0126788	0	-0.0373828	0
-25.86	0.0185536	0	-0.00918794	0	-0.0395834	0	-0.0280031	0	-0.128253	0
-24.86	-0.0355427	0	-0.0436805	0	0.0763451	0	0.000992289	0	-0.1156	0
-23.86	-0.0843993	0	-0.0620176	0	-0.0220701	0	-0.00910306	0	-0.141397	0
-22.86	-0.0611175	0	-0.0567594	0	-0.0622374	0	-0.0300168	0	-0.135196	0
-21.86	-0.0544833	0	-0.0374639	0	-0.0479314	0	-0.0200936	0	-0.133161	0
-20.86	-0.0381852	0	-0.0279618	0	-0.0460664	0	-0.0161134	0	-0.125977	0
-19.86	-0.0434207	0	-0.0374792	0	-0.0546301	0	-0.0207498	0	-0.122114	0
-18.86	-0.0341233	0	-0.0291307	0	-0.0424745	0	-0.0276705	0	-0.127463	0
-17.86	-0.0272216	0	-0.0333251	0	-0.0363769	0	-0.0233763	0	-0.106842	0
-16.86	-0.0274352	0	-0.0373533	0	-0.035568	0	-0.0112912	0	-0.0853115	0
-15.86	-0.0190505	0	-0.0241468	0	-0.027786	0	-0.00141869	0	-0.0655972	0
-14.86	-0.00647715	0	-0.0164867	0	-0.0052944	0	0.00427306	0	-0.048324	0
-13.86	0.0132388	0	0.0106389	0	-0.00156809	0	0.0203224	0	-0.0211815	0
-12.86	0.00350189	0	0.0241318	0	-0.0018158	0	0.0205841	0	-0.0206146	0
-11.86	-0.00245809	0	0.00534535	0	-0.010211	0	-0.000652775	0	-0.0187955	0
-10.86	-0.00585914	0	-0.000472546	0	-0.00880384	0	-0.0118248	0	-0.00224233	0
-9.85999	-0.0124586	0	-0.00684325	0	-0.00982635	0	-0.0075984	0	3.09907e-05	0
-8.85999	-0.0251831	0	-0.0314453	0	-0.0127075	0	-0.0114318	0	-0.001773	0
-7.85999	-0.0339429	0	-0.0386422	0	-0.0256799	0	-0.0324392	0	-0.0130911	0
-6.85999	-0.0149974	0	-0.0296973	0	-0.0290336	0	-0.0423602	0	-0.0144213	0
-5.85999	0.0189996	0	0.042966	0	-0.00989811	0	-0.00712622	0	0.0285488	0
-4.85999	0.0074964	0	0.0210582	0	-0.00156299	0	-0.00936352	0	0.0342766	0
-3.85999	-0.101595	0	-0.019025	0	-0.0442707	0	-0.0372922	0	-0.00660682	0
-2.85999	-0.0702924	0	0.106104	0	0.00254264	0	0.127883	0	0.162154	0
-1.85999	-0.0405146	0	0.0881296	0	-0.122884	0	-0.0435716	0	-0.0895311	0
-0.859985	1.10506	0	0.964817	0	0.753719	0	1.13993	0	1.08999	0
0.140015	3.13925	3.33692	2.37723	3.96661	-0.680232	0	-1.41104	0	-1.34021	0
1.14001	27.1312	23.0433	15.4363	13.7447	5.43155	4.66087	3.50149	2.74999	2.32357	1.3812
2.14001	40.4812	37.0431	23.2554	21.2289	10.3711	9.15378	5.4111	4.9759	2.97209	2.50963
3.14001	49.3276	46.9888	28.7285	26.9574	14.2269	12.7233	7.22673	6.77758	4.00131	3.43156
4.14001	55.0613	54.0544	32.509	31.342	16.9245	15.5592	8.62558	8.23591	4.7229	4.18478
5.14001	58.8025	59.074	35.2275	34.6979	18.8695	17.8122	9.62321	9.4163	5.32067	4.80015
6.14001	61.6698	62.64	37.3255	37.2666	20.4117	19.6022	10.392	10.3717	5.76252	5.30291
7.14001	63.7984	65.1733	38.8622	39.2327	21.5233	21.0243	11.0962	11.1451	6.10107	5.71366
8.14001	65.3474	66.9731	40.0737	40.7376	22.4241	22.1541	11.6625	11.771	6.35899	6.04925
9.14001	66.5742	68.2517	41.0765	41.8894	23.1703	23.0517	12.14	12.2777	6.55209	6.32342
10.14	67.4931	69.16	41.9104	42.771	23.7594	23.7648	12.566	12.6878	6.75232	6.54742
11.14	68.1285	69.8053	42.4185	43.4458	24.2511	24.3314	12.93	13.0198	6.91962	6.73043
12.14	68.6796	70.2637	42.8406	43.9623	24.5587	24.7815	13.1589	13.2885	7.04234	6.87996
13.14	69.0883	70.5894	43.1837	44.3576	24.9133	25.1391	13.4469	13.5059	7.17364	7.00211
14.14	69.4642	70.8207	43.5047	44.6602	25.1045	25.4232	13.6006	13.682	7.25354	7.10191
15.14	69.7826	70.9851	43.7785	44.8918	25.2964	25.6489	13.7595	13.8245	7.28042	7.18345
16.14	70.0521	71.1019	44.0319	45.069	25.4241	25.8282	13.9259	13.9398	7.33737	7.25006
17.14	70.207	71.1849	44.1672	45.2047	25.6175	25.9707	14.0399	14.0332	7.41835	7.30449
18.14	70.4661	71.2438	44.3742	45.3086	25.7368	26.0839	14.1415	14.1087	7.46159	7.34895
19.14	70.6281	71.2857	44.5058	45.3881	25.8267	26.1738	14.2477	14.1699	7.53813	7.38528
20.14	70.7899	71.3154	44.6662	45.4489	25.9815	26.2453	14.3423	14.2194	7.57071	7.41495
21.14	70.918	71.3365	44.7243	45.4955	26.0571	26.302	14.4252	14.2594	7.64574	7.4392
22.14	71.0246	71.3515	44.8557	45.5311	26.0602	26.3471	14.5313	14.2919	7.67484	7.45901
23.14	71.1589	71.3622	44.932	45.5584	26.129	26.383	14.5918	14.3181	7.69277	7.47519
24.14	71.233	71.3698	45.0028	45.5793	26.1791	26.4114	14.6479	14.3394	7.68013	7.48842
25.14	71.3274	71.3751	45.0352	45.5953	26.2286	26.434	14.6455	14.3566	7.68127	7.49922
26.14	71.4298	71.379	45.0616	45.6075	26.2671	26.452	14.6399	14.3705	7.68359	7.50804
27.14	71.4755	71.3817	45.1319	45.6169	26.2978	26.4663	14.6957	14.3818	7.69081	7.51525
28.14	71.5518	71.3836	45.1757	45.624	26.3672	26.4776	14.7457	14.3909	7.70647	7.52114
29.14	71.5869	71.385	45.2157	45.6295	26.4253	26.4866	14.7814	14.3983	7.73042	7.52596
30.14	71.6475	71.3859	45.2713	45.6337	26.4816	26.4938	14.8411	14.4042	7.79331	7.52989
31.14	71.7314	71.3866	45.2959	45.6369	26.5219	26.4995	14.877	14.4091	7.85893	7.5331
32.14	71.7538	71.3871	45.3032	45.6394	26.5367	26.504	14.9033	14.413	7.87019	7.53573
33.14	71.7518	71.3875	45.3229	45.6413	26.5515	26.5076	14.8903	14.4161	7.84917	7.53787
34.14	71.8007	71.3877	45.3424	45.6427	26.5669	26.5104	14.9139	14.4187	7.84819	7.53962
35.14	71.8275	71.3879	45.3651	45.6438	26.5917	26.5127	14.9231	14.4208	7.8644	7.54105
36.14	71.8768	71.388	45.3686	45.6447	26.6046	26.5145	14.9365	14.4225	7.87735	7.54222
37.14	71.8871	71.3881	45.4159	45.6453	26.6176	26.5159	14.9333	14.4238	7.87802	7.54318
38.14	71.8909	71.3882	45.435	45.6458	26.613	26.517	14.9448	14.4249	7.89073	7.54396
39.14	71.9057	71.3882	45.4517	45.6462	26.5809	26.5179	14.9735	14.4258	7.8948	7.54459
40.14	71.9361	71.3883	45.4966	45.6465	26.5823	26.5187	14.9699	14.4265	7.90108	7.54512
41.14	71.9893	71.3883	45.5471	45.6467	26.6273	26.5192	15.0071	14.4271	7.90891	7.54554
42.14	72.0422	71.3883	45.5597	45.6469	26.6762	26.5197	15.0266	14.4276	7.91667	7.54589
43.14	72.085	71.3883	45.5678	45.647	26.6812	26.52	15.043	14.428	7.93948	7.54617
44.14	72.1081	71.3883	45.5716	45.6471	26.6883	26.5203	15.0552	14.4283	7.96199	7.54641
45.14	72.1178	71.3883	45.5958	45.6472	26.6981	26.5206	15.0539	14.4285	7.95374	7.54659
46.14	72.1317	71.3883	45.6041	45.6472	26.7028	26.5207	15.0575	14.4287	7.94281	7.54675
47.14	72.1635	71.3883	45.624	45.6473	26.7144	26.5209	15.0766	14.4289	7.94405	7.54688
48.14	72.193	71.3883	45.6181	45.6473	26.7044	26.521	15.1047	14.429	7.97401	7.54698
49.14	72.2281	71.3883	45.6461	45.6473	26.696	26.5211	15.1153	14.4291	8.00731	7.54706
50.14	72.2174	71.3883	45.6377	45.6473	26.6914	26.5212	15.136	14.4292	8.01792	7.54713
51.14	72.2409	71.3883	45.6659	45.6474	26.7063	26.5212	15.129	14.4293	8.0343	7.54719
52.14	72.2619	71.3883	45.6807	45.6474	26.7265	26.5213	15.1403	14.4294	8.04523	7.54724
53.14	72.2925	71.3883	45.6804	45.6474	26.7533	26.5213	15.1346	14.4294	8.04776	7.54727
54.14	72.344	71.3883	45.7014	45.6474	26.7804	26.5213	15.1329	14.4294	8.05113	7.5473
55.14	72.3966	71.3883	45.7335	45.6474	26.818	26.5213	15.161	14.4295	8.07761	7.54733
56.14	72.4322	71.3883	45.755	45.6474	26.8462	26.5214	15.1754	14.4295	8.10968	7.54735
57.14	72.4516	71.3883	45.7953	45.6474	26.8653	26.5214	15.1794	14.4295	8.11241	7.54737
58.14	72.4649	71.3883	45.7967	45.6474	26.866	26.5214	15.1938	14.4295	8.1202	7.54738
59.14	72.4635	71.3883	45.8255	45.6474	26.8844	26.5214	15.1879	14.4295	8.11901	7.54739
60.14	72.4755	71.3883	45.8206	45.6474	26.881	26.5214	15.1797	14.4296	8.11112	7.5474
61.14	72.5206	71.3883	45.8443	45.6474	26.8973	26.5214	15.1883	14.4296	8.11434	7.54741
62.14	72.5629	71.3883	45.8616	45.6474	26.8867	26.5214	15.2016	14.4296	8.12644	7.54741
63.14	72.5533	71.3883	45.8681	45.6474	26.8846	26.5214	15.1992	14.4296	8.11697	7.54742
64.14	72.544	71.3883	45.8866	45.6474	26.8801	26.5214	15.2001	14.4296	8.11011	7.54742
65.14	72.5787	71.3883	45.8902	45.6474	26.8838	26.5214	15.2131	14.4296	8.14108	7.54743
66.14	72.6008	71.3883	45.8672	45.6474	26.8827	26.5214	15.229	14.4296	8.1503	7.54743
67.14	72.5434	71.3883	45.8312	45.6474	26.8709	26.5214	15.2437	14.4296	8.14855	7.54743
68.14	72.4089	71.3883	45.7788	45.6474	26.8006	26.5214	15.2292	14.4296	8.12593	7.54743
69.14	72.2735	71.3883	45.6787	45.6474	26.7221	26.5214	15.2053	14.4296	8.09378	7.54743
70.14	72.1806	71.3883	45.5976	45.6474	26.6735	26.5214	15.1357	14.4296	8.09328	7.54744
71.14	72.0865	71.3883	45.5663	45.6474	26.6513	26.5214	15.1218	14.4296	8.09516	7.54744
72.14	72.0161	71.3883	45.5379	45.6474	26.6267	26.5214	15.1122	14.4296	8.09246	7.54744
73.14	71.964	71.3883	45.4389	45.6474	26.5628	26.5214	15.0587	14.4296	8.07959	7.54744
74.14	71.9064	71.3883	45.3564	45.6474	26.5178	26.5214	15.0366	14.4296	8.06726	7.54744
75.14	71.8626	71.3883	45.339	45.6474	26.4713	26.5214	15.0226	14.4296	8.05011	7.54744
76.14	71.8318	71.3883	45.3448	45.6474	26.4195	26.5214	15.0042	14.4296	8.0625	7.54744
77.14	71.8287	71.3883	45.3339	45.6474	26.4009	26.5214	14.981	14.4296	8.0703	7.54744
78.14	71.7969	71.3883	45.2943	45.6474	26.3936	26.5214	14.9385	14.4296	8.09338	7.54744
79.14	71.7433	71.3883	45.2607	45.6474	26.3516	26.5214	14.9168	14.4296	8.07488	7.54744
80.14	71.6874	71.3883	45.2052	45.6474	26.3137	26.5214	14.8774	14.4296	8.03073	7.54744
81.14	71.6611	71.3883	45.1822	45.6474	26.2746	26.5214	14.8693	14.4296	8.02922	7.54744
82.14	71.6704	71.3883	45.1517	45.6474	26.2624	26.5214	14.8686	14.4296	8.02818	7.54744
83.14	71.6665	71.3883	45.159	45.6474	26.2506	26.5214	14.8807	14.4296	8.05524	7.54744
84.14	71.6573	71.3883	45.1315	45.6474	26.2304	26.5214	14.8697	14.4296	8.06717	7.54744
85.14	71.6329	71.3883	45.1079	45.6474	26.1933	26.5214	14.8466	14.4296	8.06359	7.54744
86.14	71.6115	71.3883	45.0936	45.6474	26.1722	26.5214	14.8334	14.4296	8.06026	7.54744
87.14	71.5663	71.3883	45.0727	45.6474	26.1405	26.5214	14.8065	14.4296	8.05311	7.54744
88.14	71.5589	71.3883	45.0548	45.6474	26.0922	26.5214	14.7828	14.4296	8.04047	7.54744
89.14	71.5339	71.3883	45.0415	45.6474	26.0627	26.5214	14.7628	14.4296	8.01065	7.54744
90.14	71.5378	71.3883	45.038	45.6474	26.0452	26.5214	14.7447	14.4296	8.01222	7.54744
91.14	71.5115	71.3883	45.0209	45.6474	26.0267	26.5214	14.716	14.4296	7.9951	7.54744
92.14	71.4831	71.3883	44.9947	45.6474	25.9881	26.5214	14.6827	14.4296	7.97314	7.54744
93.14	71.4646	71.3883	44.9775	45.6474	25.9678	26.5214	14.6568	14.4296	7.9641	7.54744
94.14	71.4581	71.3883	44.9428	45.6474	25.9469	26.5214	14.6321	14.4296	7.95378	7.54744
95.14	71.462	71.3883	44.9299	45.6474	25.9267	26.5214	14.6246	14.4296	7.94472	7.54744
96.14	71.4479	71.3883	44.9005	45.6474	25.9162	26.5214	14.612	14.4296	7.93215	7.54744
97.14	71.4593	71.3883	44.9072	45.6474	25.9119	26.5214	14.5949	14.4296	7.92789	7.54744
98.14	71.4763	71.3883	44.9173	45.6474	25.8957	26.5214	14.5919	14.4296	7.9296	7.54744
99.14	71.4949	71.3883	44.9077	45.6474	25.8895	26.5214	14.5817	14.4296	7.93593	7.54744
100.14	71.5188	71.3883	44.9168	45.6474	25.883	26.5214	14.5653	14.4296	7.92952	7.54744
101.14	71.5412	71.3883	44.9164	45.6474	25.884	26.5214	14.581	14.4296	7.94203	7.54744
102.14	71.5346	71.3883	44.8975	45.6474	25.886	26.5214	14.5871	14.4296	7.93109	7.54744
103.14	71.5181	71.3883	44.8672	45.6474	25.8671	26.5214	14.563	14.4296	7.92222	7.54744
104.14	71.4903	71.3883	44.8548	45.6474	25.8507	26.5214	14.5438	14.4296	7.90612	7.54744
105.14	71.4818	71.3883	44.8333	45.6474	25.8263	26.5214	14.5237	14.4296	7.89932	7.54744
106.14	71.4753	71.3883	44.8146	45.6474	25.7994	26.5214	14.5113	14.4296	7.88844	7.54744
107.14	71.5175	71.3883	44.8174	45.6474	25.7908	26.5214	14.5055	14.4296	7.88608	7.54744
108.14	71.5231	71.3883	44.807	45.6474	25.792	26.5214	14.4944	14.4296	7.88609	7.54744
109.14	71.566	71.3883	44.7962	45.6474	25.7963	26.5214	14.5019	14.4296	7.87901	7.54744
110.14	71.5821	71.3883	44.7878	45.6474	25.7986	26.5214	14.5014	14.4296	7.88022	7.54744
111.14	71.5966	71.3883	44.7805	45.6474	25.8051	26.5214	14.504	14.4296	7.88617	7.54744
112.14	71.5758	71.3883	44.7536	45.6474	25.7849	26.5214	14.4949	14.4296	7.88344	7.54744
113.14	71.5791	71.3883	44.748	45.6474	25.7676	26.5214	14.4965	14.4296	7.87688	7.54744
114.14	71.5883	71.3883	44.7406	45.6474	25.7721	26.5214	14.498	14.4296	7.88014	7.54744
115.14	71.5527	71.3883	44.7111	45.6474	25.7439	26.5214	14.4723	14.4296	7.88238	7.54744
116.14	71.5332	71.3883	44.7068	45.6474	25.6995	26.5214	14.4515	14.4296	7.868	7.54744
117.14	71.5065	71.3883	44.7157	45.6474	25.659	26.5214	14.4268	14.4296	7.84468	7.54744
118.14	71.4814	71.3883	44.6816	45.6474	25.6467	26.5214	14.3937	14.4296	7.82164	7.54744
119.14	71.3349	71.3883	44.5432	45.6474	25.5823	26.5214	14.2798	14.4296	7.73701	7.54744
120.14	72.4388	69.487	44.126	43.5831	25.8377	26.5214	15.0656	14.4296	8.86396	7.54744
121.14	54.9337	57.3022	33.8183	35.9407	22.2963	22.995	11.2496	12.0377	5.54126	6.22397
122.14	45.0218	47.2541	27.5105	29.6384	17.9316	18.9627	9.7977	9.92684	5.67136	5.13258
123.14	36.0095	38.968	22.1041	24.4412	14.3267	15.6376	7.9444	8.18614	4.64679	4.23257
124.14	29.258	32.1348	18.0877	20.1554	11.7123	12.8955	6.5906	6.75067	3.99503	3.49037
125.14	24.1003	26.4999	15.0616	16.621	9.69344	10.6342	5.56877	5.56692	3.49952	2.87833
126.14	20.1506	21.853	12.6603	13.7065	8.21189	8.76947	4.79024	4.59074	3.17403	2.3736
127.14	17.0052	18.021	10.7689	11.303	6.99879	7.23171	4.25802	3.78574	2.83112	1.95738
128.14	14.5075	14.861	9.27909	9.321	6.08975	5.96361	3.81636	3.1219	2.63141	1.61415
129.14	12.509	12.2551	8.08878	7.68653	5.41737	4.91787	3.38897	2.57447	2.46855	1.3311
130.14	10.9222	10.1061	7.17946	6.33868	4.85931	4.05551	3.12789	2.12303	2.38122	1.09769
131.14	9.65287	8.33397	6.37257	5.22717	4.397	3.34436	2.88175	1.75075	2.19837	0.9052
132.14	8.5894	6.87258	5.76024	4.31057	3.97335	2.75792	2.66907	1.44375	2.07896	0.746463
133.14	7.73226	5.66745	5.26526	3.5547	3.65783	2.27431	2.56133	1.19058	1.97482	0.615563
134.14	6.98115	4.67365	4.8102	2.93137	3.37433	1.8755	2.38132	0.981801	1.93465	0.507618
135.14	6.35892	3.85411	4.47336	2.41735	3.19776	1.54663	2.22154	0.809632	1.87128	0.418602
136.14	5.90419	3.17828	4.26161	1.99346	3.06838	1.27542	2.23803	0.667655	1.84057	0.345196
137.14	5.49535	2.62096	3.99614	1.6439	2.93163	1.05177	2.16887	0.550575	1.8418	0.284662
138.14	5.13071	2.16136	3.85766	1.35564	2.78965	0.867333	2.10475	0.454026	1.83145	0.234744
139.14	4.83891	1.78236	3.62008	1.11792	2.698	0.715237	2.0513	0.374408	1.78121	0.193579
140.14	4.58063	1.46982	3.46102	0.921881	2.59455	0.589813	1.97943	0.308752	1.72456	0.159633
141.14	4.37263	1.21208	3.28565	0.76022	2.55049	0.486383	1.97811	0.254609	1.70488	0.13164
142.14	4.17963	0.999531	3.20565	0.626908	2.4931	0.401091	1.95494	0.209961	1.70133	0.108555
143.14	3.99193	0.824253	3.1002	0.516973	2.4089	0.330755	1.91783	0.173142	1.70045	0.089519
144.14	3.84628	0.679712	3.02379	0.426316	2.34647	0.272754	1.88566	0.14278	1.67953	0.0738209
145.14	3.71086	0.560518	2.93578	0.351557	2.31799	0.224924	1.84732	0.117742	1.64722	0.0608757
146.14	3.54627	0.462225	2.87094	0.289908	2.27675	0.185481	1.7906	0.0970945	1.64003	0.0502005
147.14	3.41482	0.381169	2.778	0.23907	2.22182	0.152955	1.74975	0.080068	1.61864	0.0413973
148.14	3.30278	0.314327	2.68597	0.197146	2.1669	0.126133	1.72452	0.0660272	1.58691	0.0341379
149.14	3.22086	0.259207	2.64124	0.162575	2.13011	0.104014	1.69608	0.0544487	1.55527	0.0281514
150.14	3.18562	0.213752	2.60492	0.134066	2.09107	0.0857742	1.69386	0.0449005	1.54985	0.0232148
151.14	3.06867	0.176268	2.55458	0.110556	2.04805	0.0707328	1.65204	0.0370268	1.53554	0.0191438
152.14	2.97045	0.145358	2.51873	0.0911688	2.03029	0.0583291	1.63237	0.0305337	1.52274	0.0157868
153.14	2.93558	0.119868	2.47728	0.0751814	1.99749	0.0481005	1.61275	0.0251793	1.52077	0.0130184
154.14	2.89862	0.0988479	2.46871	0.0619976	1.97771	0.0396656	1.60792	0.0207639	1.53267	0.0107355
155.14	2.85234	0.0815139	2.44341	0.0511256	1.97204	0.0327098	1.62338	0.0171227	1.54632	0.00885291
156.14	2.79459	0.0672196	2.43008	0.0421602	1.96771	0.0269738	1.62418	0.0141201	1.54267	0.00730046
157.14	2.76	0.0554319	2.39309	0.034767	1.9639	0.0222437	1.62173	0.011644	1.5314	0.00602025
158.14	2.71881	0.0457114	2.35969	0.0286703	1.93568	0.018343	1.59754	0.00960209	1.50243	0.00496454
159.14	2.6659	0.0376954	2.33371	0.0236426	1.92254	0.0151264	1.59218	0.00791826	1.5002	0.00409396
160.14	2.6296	0.0310851	2.2984	0.0194967	1.91687	0.0124738	1.59056	0.00652971	1.5021	0.00337604
161.14	2.60388	0.025634	2.27991	0.0160777	1.91327	0.0102864	1.58753	0.00538466	1.50063	0.00278402
162.14	2.58825	0.0211389	2.26668	0.0132583	1.898	0.00848257	1.57631	0.0044404	1.50386	0.00229581
163.14	2.57021	0.0174319	2.26559	0.0109333	1.8812	0.00699507	1.56185	0.00366173	1.50933	0.00189322
164.14	2.53947	0.0143751	2.23961	0.00901606	1.85472	0.00576841	1.54772	0.00301961	1.50847	0.00156122
165.14	2.48213	0.0118543	2.22626	0.00743501	1.83315	0.00475686	1.56068	0.00249009	1.49019	0.00128745
166.14	2.46118	0.00977549	2.21547	0.0061312	1.83722	0.0039227	1.54726	0.00205343	1.48653	0.00106168
167.14	2.42824	0.00806125	2.22839	0.00505603	1.85771	0.00323481	1.5612	0.00169334	1.46767	0.000875502
168.14	2.40879	0.00664763	2.2061	0.0041694	1.85718	0.00266755	1.54689	0.00139639	1.46507	0.000721974
169.14	2.38509	0.0054819	2.19819	0.00343826	1.86096	0.00219977	1.53209	0.00115152	1.44355	0.000595368
170.14	2.36946	0.00452059	2.1772	0.00283532	1.86097	0.00181402	1.52818	0.000949591	1.45613	0.000490964
171.14	2.33752	0.00372786	2.1318	0.00233812	1.8434	0.00149591	1.50006	0.00078307	1.43425	0.000404869
172.14	2.30193	0.00307414	2.12895	0.00192811	1.82549	0.00123359	1.4906	0.000645751	1.42792	0.000333871
173.14	2.27631	0.00253506	2.09332	0.00158999	1.80979	0.00101727	1.50319	0.000532512	1.4241	0.000275323
174.14	2.23623	0.00209051	2.06198	0.00131117	1.78745	0.000838878	1.47936	0.00043913	1.42495	0.000227042
175.14	2.19975	0.00172392	2.05311	0.00108124	1.76544	0.000691772	1.45815	0.000362124	1.41734	0.000187228
176.14	2.20449	0.00142161	2.05836	0.000891637	1.75553	0.000570463	1.47384	0.000298622	1.40483	0.000154396
177.14	2.1946	0.00117232	2.03749	0.000735279	1.7592	0.000470426	1.4655	0.000246256	1.39625	0.000127321
178.14	2.20489	0.000966739	2.03423	0.00060634	1.77196	0.000387932	1.46721	0.000203072	1.39664	0.000104994
179.14	2.20889	0.000797212	2.00085	0.000500012	1.77179	0.000319904	1.45917	0.000167461	1.38008	8.65821e-05
180.14	2.20421	0.000657412	1.98615	0.00041233	1.75226	0.000263806	1.43454	0.000138095	1.36209	7.1399e-05
181.14	2.18456	0.000542128	1.96918	0.000340024	1.74929	0.000217545	1.40315	0.000113879	1.35884	5.88785e-05
182.14	2.17558	0.000447061	1.98306	0.000280397	1.73297	0.000179396	1.40158	9.39091e-05	1.36507	4.85535e-05
183.14	2.1426	0.000368664	1.97198	0.000231227	1.72935	0.000147937	1.4019	7.74411e-05	1.35219	4.00392e-05
184.14	2.11729	0.000304015	1.98875	0.000190679	1.71054	0.000121995	1.39743	6.3861e-05	1.35811	3.30179e-05
185.14	2.10107	0.000250703	1.991	0.000157241	1.69669	0.000100602	1.40839	5.26624e-05	1.36218	2.72279e-05
186.14	2.11421	0.000206739	2.01443	0.000129667	1.70281	8.29602e-05	1.42979	4.34275e-05	1.36272	2.24532e-05
187.14	2.12257	0.000170486	2.02039	0.000106929	1.69202	6.84123e-05	1.42801	3.5812e-05	1.3625	1.85158e-05
188.14	2.10031	0.000140589	2.00865	8.81777e-05	1.68649	5.64155e-05	1.43002	2.9532e-05	1.3725	1.52689e-05
189.14	2.10483	0.000115935	2.02234	7.27149e-05	1.70779	4.65224e-05	1.43847	2.43533e-05	1.3843	1.25913e-05
190.14	2.09735	9.56049e-05	2.01718	5.99636e-05	1.70056	3.83642e-05	1.44403	2.00827e-05	1.40448	1.03833e-05
191.14	2.06678	7.88396e-05	2.00239	4.94483e-05	1.68369	3.16367e-05	1.436	1.6561e-05	1.39668	8.56247e-06
192.14	2.05586	6.50143e-05	1.99106	4.07771e-05	1.66657	2.60889e-05	1.44017	1.36568e-05	1.40062	7.06095e-06
193.14	2.05135	5.36134e-05	1.9894	3.36264e-05	1.66444	2.15139e-05	1.4587	1.1262e-05	1.38969	5.82274e-06
194.14	2.03148	4.42117e-05	1.98294	2.77297e-05	1.65679	1.77412e-05	1.44165	9.28706e-06	1.39068	4.80167e-06
195.14	2.01917	3.64587e-05	1.95761	2.2867e-05	1.63545	1.46301e-05	1.43691	7.65848e-06	1.36446	3.95964e-06
196.14	1.99356	3.00653e-05	1.95298	1.8857e-05	1.63172	1.20646e-05	1.42111	6.31549e-06	1.34866	3.26528e-06
197.14	2.00425	2.47931e-05	1.94871	1.55502e-05	1.63506	9.94893e-06	1.43097	5.208e-06	1.3589	2.69268e-06
198.14	2.01146	2.04453e-05	1.94019	1.28233e-05	1.63448	8.20428e-06	1.43951	4.29473e-06	1.3687	2.22049e-06
199.14	1.99687	1.686e-05	1.92816	1.05746e-05	1.636	6.76558e-06	1.4265	3.5416e-06	1.35288	1.8311e-06
200.14	1.99218	1.39035e-05	1.93062	8.72027e-06	1.6406	5.57916e-06	1.42666	2.92055e-06	1.35805	1.51e-06
201.14	1.99923	1.14653e-05	1.94922	7.19108e-06	1.65574	4.6008e-06	1.43468	2.4084e-06	1.37355	1.24521e-06
202.14	2.00152	9.45478e-06	1.95807	5.93005e-06	1.64644	3.794e-06	1.44388	1.98606e-06	1.3848	1.02685e-06
203.14	1.98808	7.79678e-06	1.95754	4.89016e-06	1.65689	3.12868e-06	1.4449	1.63778e-06	1.3841	8.46779e-07
204.14	1.98622	6.42954e-06	1.97597	4.03262e-06	1.67791	2.58004e-06	1.46005	1.35058e-06	1.40753	6.98288e-07
205.14	1.99473	5.30205e-06	1.97785	3.32546e-06	1.68103	2.1276e-06	1.48154	1.11374e-06	1.4173	5.75836e-07
206.14	1.95531	4.37228e-06	1.9581	2.7423e-06	1.67304	1.7545e-06	1.47978	9.18437e-07	1.41562	4.74857e-07
207.14	1.93382	3.60556e-06	1.951	2.26141e-06	1.65045	1.44683e-06	1.46604	7.5738e-07	1.40055	3.91586e-07
208.14	1.91505	2.97329e-06	1.94355	1.86485e-06	1.65526	1.19312e-06	1.4499	6.24565e-07	1.41815	3.22917e-07
209.14	1.88206	2.45189e-06	1.92446	1.53783e-06	1.63843	9.83892e-07	1.44868	5.15041e-07	1.41061	2.6629e-07
210.14	1.84445	2.02193e-06	1.89664	1.26816e-06	1.62116	8.11356e-07	1.4216	4.24724e-07	1.39047	2.19594e-07
211.14	1.81992	1.66736e-06	1.89107	1.04577e-06	1.60359	6.69077e-07	1.40501	3.50244e-07	1.37515	1.81086e-07
212.14	1.81664	1.37497e-06	1.87618	8.62384e-07	1.6053	5.51747e-07	1.40019	2.88825e-07	1.38173	1.4933e-07
213.14	1.80506	1.13386e-06	1.8641	7.11156e-07	1.6162	4.54993e-07	1.40037	2.38177e-07	1.37246	1.23144e-07
214.14	1.80518	9.35023e-07	1.87039	5.86448e-07	1.6132	3.75205e-07	1.39072	1.9641e-07	1.36943	1.01549e-07
215.14	1.81349	7.71057e-07	1.86522	4.83608e-07	1.6135	3.09409e-07	1.39011	1.61967e-07	1.37032	8.37416e-08
216.14	1.82431	6.35844e-07	1.85382	3.98802e-07	1.61354	2.55151e-07	1.40967	1.33565e-07	1.37628	6.90566e-08
217.14	1.83551	5.24342e-07	1.87034	3.28868e-07	1.63253	2.10408e-07	1.42224	1.10143e-07	1.39238	5.69468e-08
218.14	1.84113	4.32394e-07	1.85907	2.71198e-07	1.63117	1.7351e-07	1.4283	9.08281e-08	1.39874	4.69606e-08
219.14	1.84807	3.56569e-07	1.88535	2.23641e-07	1.63663	1.43084e-07	1.44394	7.49005e-08	1.40587	3.87256e-08
220.14	1.84189	2.94041e-07	1.89961	1.84423e-07	1.65605	1.17992e-07	1.45694	6.17659e-08	1.41574	3.19347e-08
221.14	1.82853	2.42478e-07	1.89251	1.52082e-07	1.65293	9.73012e-08	1.45546	5.09346e-08	1.39277	2.63346e-08
222.14	1.83872	1.99957e-07	1.8977	1.25413e-07	1.65089	8.02384e-08	1.43826	4.20027e-08	1.40215	2.17165e-08
223.14	1.82995	1.64892e-07	1.88337	1.03421e-07	1.6457	6.61678e-08	1.42853	3.46371e-08	1.38381	1.79083e-08
224.14	1.79737	1.35977e-07	1.89254	8.52848e-08	1.63982	5.45646e-08	1.42268	2.85631e-08	1.38305	1.47679e-08
225.14	1.78094	1.12132e-07	1.86555	7.03293e-08	1.63503	4.49961e-08	1.40771	2.35543e-08	1.36816	1.21782e-08
226.14	1.75418	9.24684e-08	1.83542	5.79963e-08	1.61909	3.71056e-08	1.39115	1.94238e-08	1.36167	1.00426e-08
227.14	1.72403	7.62531e-08	1.83839	4.78261e-08	1.60799	3.05988e-08	1.3824	1.60176e-08	1.35127	8.28156e-09
228.14	1.69883	6.28813e-08	1.8268	3.94393e-08	1.6126	2.52329e-08	1.36997	1.32088e-08	1.34167	6.8293e-09
229.14	1.69308	5.18544e-08	1.83337	3.25232e-08	1.60632	2.08081e-08	1.37026	1.08925e-08	1.34045	5.63171e-09
230.14	1.6842	4.27612e-08	1.83241	2.68199e-08	1.61507	1.71592e-08	1.35448	8.98238e-09	1.34297	4.64413e-09
231.14	1.6961	3.52626e-08	1.83413	2.21168e-08	1.61604	1.41501e-08	1.35318	7.40723e-09	1.34324	3.82974e-09
232.14	1.70141	2.90789e-08	1.83874	1.82384e-08	1.63113	1.16688e-08	1.36466	6.10829e-09	1.348	3.15815e-09
233.14	1.70716	2.39797e-08	1.81739	1.50401e-08	1.62924	9.62253e-09	1.34514	5.03714e-09	1.3548	2.60434e-09
234.14	1.7029	1.97746e-08	1.81039	1.24026e-08	1.64034	7.93512e-09	1.34882	4.15383e-09	1.35059	2.14764e-09
235.14	1.71324	1.63069e-08	1.82055	1.02277e-08	1.65601	6.54361e-09	1.35618	3.42541e-09	1.35437	1.77103e-09
236.14	1.71279	1.34473e-08	1.81226	8.43418e-09	1.65084	5.39612e-09	1.35158	2.82473e-09	1.36117	1.46046e-09
237.14	1.7077	1.10892e-08	1.80246	6.95516e-09	1.64745	4.44986e-09	1.36279	2.32938e-09	1.35753	1.20435e-09
238.14	1.71981	9.14459e-09	1.81238	5.7355e-09	1.64838	3.66953e-09	1.36342	1.9209e-09	1.35151	9.93159e-10
239.14	1.73497	7.54099e-09	1.80441	4.72972e-09	1.65916	3.02604e-09	1.37216	1.58405e-09	1.33409	8.18998e-10
240.14	1.66852	6.2186e-09	1.8287	3.90032e-09	1.67017	2.49539e-09	1.36789	1.30627e-09	1.31848	6.75379e-10
