# Supplementary material for: Molecular mechanism of complement inhibition by the trypanosome receptor ISG65
Source: eLife. 2024 Apr 24;12:RP88960. doi: 10.7554/eLife.88960 (PMC11042801; doi:10.7554/eLife.88960)
Supplement: Figure 2—source data 1. [file elife-88960-fig2-data1.xlsx]

## Sheet: biotin-C3b ISG65
Cycle: 1 ISG65WT 10000 nM_X	Cycle: 1 ISG65WT 10000 nM_Y	Fitted Cycle: 1 ISG65WT 10000 _Y	Cycle: 2 ISG65WT 5000 nM_Y	Fitted Cycle: 2 ISG65WT 5000 n_Y	Cycle: 3 ISG65WT 2500 nM_Y	Fitted Cycle: 3 ISG65WT 2500 n_Y	Cycle: 4 ISG65WT 1250 nM_Y	Fitted Cycle: 4 ISG65WT 1250 n_Y	Cycle: 5 ISG65WT 625 nM_Y	Fitted Cycle: 5 ISG65WT 625 nM_Y	Cycle: 6 ISG65WT 312.5 nM_Y	Fitted Cycle: 6 ISG65WT 312.5 _Y
-60.46	0.590401	0	0.903458	0	0.792946	0	0.490326	0	0.19925	0	0.208184	0
-59.46	0.587276	0	0.906192	0	0.771852	0	0.48642	0	0.182452	0	0.187871	0
-58.46	0.596261	0	0.904435	0	0.748024	0	0.485443	0	0.180695	0	0.181817	0
-57.46	0.588448	0	0.886856	0	0.742165	0	0.495209	0	0.172882	0	0.17791	0
-56.46	0.57087	0	0.88588	0	0.724587	0	0.470795	0	0.171906	0	0.159356	0
-55.46	0.561104	0	0.88588	0	0.714821	0	0.470795	0	0.171906	0	0.157402	0
-54.46	0.543526	0	0.894669	0	0.697243	0	0.475677	0	0.180695	0	0.158379	0
-53.46	0.547433	0	0.901505	0	0.716774	0	0.490326	0	0.177766	0	0.169122	0
-52.46	0.549385	0	0.893692	0	0.732399	0	0.500092	0	0.168	0	0.186699	0
-51.46	0.534542	0	0.904239	0	0.734743	0	0.515717	0	0.188312	0	0.16834	0
-50.46	0.555245	0	0.894669	0	0.746071	0	0.516693	0	0.198273	0	0.179864	0
-49.46	0.569698	0	0.903263	0	0.758181	0	0.530365	0	0.20882	0	0.181036	0
-48.46	0.582588	0	0.905411	0	0.765602	0	0.541107	0	0.210968	0	0.190606	0
-47.46	0.592354	0	0.905411	0	0.765602	0	0.531342	0	0.210968	0	0.178887	0
-46.46	0.590401	0	0.915177	0	0.753883	0	0.51181	0	0.189484	0	0.178887	0
-45.46	0.604073	0	0.923966	0	0.746071	0	0.506927	0	0.168976	0	0.189629	0
-44.46	0.613839	0	0.943497	0	0.744118	0	0.504974	0	0.178742	0	0.189629	0
-43.46	0.609932	0	0.934708	0	0.75193	0	0.519623	0	0.179718	0	0.198418	0
-42.46	0.61462	0	0.945255	0	0.744509	0	0.515717	0	0.1805	0	0.189825	0
-41.46	0.635323	0	0.94545	0	0.736305	0	0.516693	0	0.178742	0	0.189629	0
-40.46	0.641182	0	0.934708	0	0.742165	0	0.502045	0	0.189484	0	0.178887	0
-39.46	0.645089	0	0.933732	0	0.744118	0	0.495209	0	0.188508	0	0.179864	0
-38.46	0.684151	0	0.977479	0	0.734352	0	0.51474	0	0.178742	0	0.177911	0
-37.46	0.62009	0	0.853771	0	0.812868	0	0.582901	0	0.227375	0	0.189825	0
-36.46	0.261182	0	0.453649	0	0.70904	0	0.506226	0	0.274053	0	0.263062	0
-35.46	-0.097036	0	0.150629	0	0.451963	0	0.263451	0	0.220011	0	0.218818	0
-34.46	-0.0569811	0	0.116389	0	0.182615	0	0.114548	0	-0.0800829	0	0.256409	0
-33.46	-0.73727	0	-0.530502	0	0.220404	0	0.187008	0	0.00357115	0	-0.0269175	0
-32.46	-0.413235	0	-0.166741	0	-0.268133	0	-0.417332	0	-0.394234	0	0.132058	0
-31.46	-0.216306	0	0.165381	0	0.0318541	0	0.0553627	0	0.150626	0	-0.43856	0
-30.46	-0.145486	0	-0.0809793	0	0.262271	0	0.13974	0	-0.0235452	0	0.164942	0
-29.46	-0.284863	0	-0.119305	0	0.0362108	0	-0.0332718	0	-0.0821118	0	-0.0248362	0
-28.46	-0.253866	0	-0.0563176	0	0.0196851	0	0.00512695	0	-0.0159963	0	-0.0695381	0
-27.46	-0.172519	0	-0.0272745	0	0.0735572	0	0.0456352	0	0.0133597	0	-0.00280482	0
-26.46	-0.143004	0	-0.00686148	0	0.0977331	0	0.0496635	0	0.0318958	0	0.0306147	0
-25.46	-0.130455	0	0.0236929	0	0.110523	0	0.0611076	0	0.0416754	0	0.0603711	0
-24.46	-0.115253	0	0.0430762	0	0.113711	0	0.0688057	0	0.0771491	0	0.0677901	0
-23.46	-0.0898305	0	0.0555248	0	0.136466	0	0.0776291	0	0.057104	0	0.0940064	0
-22.46	-0.0596768	0	0.0550197	0	0.151695	0	0.0859489	0	0.0648006	0	0.0597425	0
-21.46	-0.0282212	0	0.0670966	0	0.138168	0	0.0904808	0	0.0603904	0	0.0727499	0
-20.46	-0.0211293	0	0.0490725	0	0.124052	0	0.0911446	0	0.0436175	0	0.0828766	0
-19.46	-0.0381444	0	0.0365855	0	0.093942	0	0.0809097	0	0.0131633	0	0.0727043	0
-18.46	-0.0587844	0	0.0139542	0	0.0764008	0	0.0428238	0	0.0124055	0	0.062523	0
-17.46	-0.0565225	0	0.0101699	0	0.0611667	0	0.0380211	0	0.0280761	0	0.0531939	0
-16.46	-0.0423656	0	-0.00180776	0	0.0642626	0	0.0229874	0	0.017342	0	0.0604864	0
-15.46	-0.0550379	0	-0.0120577	0	0.0535128	0	0.0190773	0	0.00873236	0	0.0397156	0
-14.46	-0.034237	0	-0.015873	0	0.038866	0	0.014389	0	0.0117988	0	0.0139979	0
-13.46	-0.022689	0	-0.00334851	0	0.0252308	0	0.0134125	0	0.0142449	0	0.00842404	0
-12.46	-0.0105629	0	-0.00274662	0	0.027544	0	0.0233727	0	0.00664517	0	0.0207919	0
-11.46	-0.01636	0	-0.0102222	0	0.00616326	0	0.0102882	0	-0.00591155	0	0.0200652	0
-10.46	-0.0301781	0	0.00687027	0	-0.012846	0	-0.0152969	0	-0.0165596	0	-0.000223164	0
-9.45996	-0.0207663	0	0.00576492	0	-0.0214229	0	-0.0235405	0	-0.0074263	0	0.00666565	0
-8.45996	-0.0154257	0	0.000596046	0	-0.00500441	0	-0.0488892	0	-0.0079031	0	0.00682974	0
-7.45996	-0.0173297	0	0.00928164	0	-0.00932097	0	-0.0562744	0	-0.00719786	0	0.00798678	0
-6.45996	0.00239971	0	0.0103457	0	0.0073873	0	-0.0502586	0	-0.0161283	0	-0.00760419	0
-5.45996	0.0104832	0	-0.0235324	0	0.0153735	0	-0.061039	0	-0.0152393	0	-0.0113023	0
-4.45996	-0.016681	0	-0.0489	0	-0.00727239	0	-0.0643997	0	-0.044124	0	-0.0332155	0
-3.45996	-0.0412402	0	-0.0705676	0	-0.0179155	0	-0.0414352	0	-0.0525851	0	-0.0216191	0
-2.45996	-0.0364581	0	-0.00257593	0	0.00353763	0	-0.111282	0	-0.0255328	0	-0.0287396	0
-1.45996	0.0449069	0	0.12238	0	-0.0101966	0	-0.0614357	0	-0.0979268	0	-0.0177608	0
-0.459961	1.29244	0	-0.924342	0	0.659199	0	1.15837	0	-0.547305	0	0.226327	0
0.540039	-4.79153	8.84853	5.94743	8.13376	-2.51458	1.41068	-2.73674	1.32089	1.13166	1.0259	-1.19076	0.124897
1.54004	30.5581	24.2662	20.2954	15.8166	7.35489	5.43624	4.32701	3.31837	2.54341	2.01424	0.635612	0.633766
2.54004	47.0677	38.4171	30.945	23.0543	12.2713	9.28114	6.28939	5.23694	4.20643	2.96621	0.73594	1.12466
3.54004	63.1465	51.3013	40.2646	29.8541	18.2792	12.9496	9.46974	7.07887	5.78945	3.88295	1.60281	1.59816
4.54004	75.6403	62.9351	47.9479	36.2254	23.4354	16.4462	12.2952	8.84644	7.18471	4.76558	2.42934	2.05485
5.54004	85.373	73.3505	54.4002	42.1791	27.924	19.7755	14.8712	10.5419	8.47069	5.6152	3.29423	2.49527
6.54004	93.0969	82.5956	59.8777	47.7277	31.8783	22.9423	17.1654	12.1676	9.6099	6.43291	4.05775	2.91998
7.54004	99.2383	90.7327	64.5236	52.8852	35.4178	25.9516	19.2584	13.7257	10.6214	7.21974	4.68241	3.32948
8.54004	104.333	97.8359	68.5367	57.6667	38.5166	28.8085	21.1013	15.2183	11.6391	7.97674	5.28563	3.72429
9.54004	108.579	103.988	72.0897	62.0886	41.2884	31.5182	22.8035	16.6478	12.5217	8.7049	5.81548	4.10491
10.54	112.133	109.277	75.1156	66.1678	43.7916	34.0859	24.3303	18.0163	13.3025	9.4052	6.33036	4.47181
11.54	115.132	113.794	77.8392	69.922	45.9784	36.5169	25.7757	19.3259	14.0664	10.0786	6.72352	4.82547
12.54	117.588	117.627	80.0487	73.3693	47.9857	38.8165	27.0585	20.5787	14.7023	10.7261	7.21979	5.16633
13.54	119.637	120.862	81.926	76.528	49.7165	40.99	28.1924	21.7767	15.3407	11.3485	7.62493	5.49484
14.54	121.434	123.579	83.761	79.4163	51.2432	43.0427	29.2436	22.922	15.9787	11.9467	7.97928	5.81141
15.54	123.068	125.851	85.3821	82.0522	52.6676	44.9797	30.228	24.0165	16.5454	12.5216	8.36154	6.11647
16.54	124.481	127.744	86.8175	84.4534	53.9893	46.8063	31.1349	25.0622	17.064	13.074	8.6994	6.4104
17.54	125.719	129.316	88.0626	86.637	55.2428	48.5274	31.9593	26.061	17.5216	13.6047	8.98509	6.69361
18.54	126.753	130.618	89.1771	88.6196	56.3122	50.1481	32.6999	27.0146	17.9534	14.1146	9.23804	6.96646
19.54	127.693	131.694	90.2437	90.4169	57.3131	51.6732	33.4408	27.9249	18.42	14.6043	9.52716	7.22931
20.54	128.549	132.582	91.1652	92.0441	58.2223	53.1075	34.1154	28.7936	18.7942	15.0746	9.78593	7.48252
21.54	129.281	133.312	91.9774	93.5154	59.0419	54.4555	34.7138	29.6224	19.177	15.5263	10.0075	7.72643
22.54	129.944	133.913	92.6942	94.8442	59.8016	55.7218	35.2416	30.413	19.5224	15.9599	10.2029	7.96137
23.54	130.524	134.407	93.3612	96.0429	60.4555	56.9105	35.7351	31.1668	19.8398	16.3763	10.4146	8.18765
24.54	131.125	134.812	94.0654	97.1232	61.1079	58.0259	36.2464	31.8856	20.1487	16.776	10.5811	8.40558
25.54	131.642	135.145	94.6116	98.096	61.7231	59.0721	36.738	32.5706	20.4335	17.1597	10.826	8.61547
26.54	132.133	135.417	95.1095	98.9712	62.2579	60.0527	37.1456	33.2235	20.7026	17.5279	10.9721	8.81759
27.54	132.621	135.64	95.6686	99.7581	62.8315	60.9716	37.5409	33.8455	21.0116	17.8814	11.1106	9.01223
28.54	133.067	135.823	96.1348	100.465	63.3163	61.8323	37.9398	34.4381	21.2834	18.2205	11.3187	9.19966
29.54	133.47	135.972	96.583	101.1	63.7439	62.6381	38.3296	35.0025	21.4834	18.5459	11.4916	9.38013
30.54	133.857	136.095	96.9303	101.669	64.2052	63.3922	38.6653	35.5399	21.7012	18.8582	11.6301	9.5539
31.54	134.167	136.195	97.294	102.18	64.6382	64.0978	39.0075	36.0516	21.9082	19.1577	11.7337	9.7212
32.54	134.441	136.276	97.6558	102.638	64.9734	64.7576	39.2346	36.5387	22.0903	19.4451	11.8542	9.88229
33.54	134.691	136.343	97.9734	103.049	65.292	65.3746	39.4822	37.0024	22.2708	19.7208	11.9788	10.0374
34.54	134.959	136.398	98.3136	103.416	65.6318	65.9513	39.7465	37.4436	22.4328	19.9852	12.0894	10.1867
35.54	135.222	136.443	98.555	103.745	65.9091	66.4901	39.9853	37.8634	22.5828	20.2388	12.152	10.3304
36.54	135.454	136.479	98.8033	104.04	66.1773	66.9935	40.2311	38.2628	22.7854	20.482	12.2385	10.4687
37.54	135.643	136.509	99.0369	104.304	66.4475	67.4636	40.4465	38.6428	22.9597	20.7153	12.3533	10.6019
38.54	135.852	136.534	99.2702	104.54	66.6849	67.9026	40.6492	39.0042	23.1019	20.939	12.4844	10.7301
39.54	136.073	136.554	99.5227	104.751	66.9621	68.3124	40.8569	39.3479	23.2431	21.1535	12.6124	10.8535
40.54	136.282	136.57	99.7264	104.94	67.231	68.6949	41.0334	39.6748	23.3605	21.3591	12.7142	10.9723
41.54	136.46	136.583	99.9144	105.109	67.4433	69.0519	41.2089	39.9856	23.5071	21.5563	12.7761	11.0866
42.54	136.619	136.594	100.116	105.26	67.6542	69.3849	41.3256	40.281	23.6408	21.7453	12.8452	11.1967
43.54	136.765	136.603	100.306	105.395	67.8311	69.6955	41.4988	40.5619	23.7542	21.9265	12.9185	11.3026
44.54	136.946	136.611	100.476	105.516	67.9911	69.9853	41.7228	40.8289	23.85	22.1003	13.0074	11.4045
45.54	137.09	136.617	100.629	105.623	68.1563	70.2555	41.8593	41.0827	23.9148	22.2668	13.0583	11.5026
46.54	137.223	136.621	100.794	105.72	68.2946	70.5075	41.9604	41.3239	24.0171	22.4264	13.1079	11.597
47.54	137.358	136.625	100.937	105.806	68.4611	70.7424	42.0869	41.5531	24.1237	22.5795	13.1846	11.6879
48.54	137.507	136.629	101.086	105.883	68.6107	70.9614	42.2252	41.7709	24.2189	22.7261	13.2445	11.7753
49.54	137.653	136.631	101.243	105.952	68.767	71.1655	42.3729	41.9779	24.318	22.8667	13.2991	11.8595
50.54	137.78	136.633	101.384	106.013	68.9034	71.3557	42.4998	42.1745	24.4008	23.0014	13.3582	11.9404
51.54	137.902	136.635	101.515	106.068	69.0438	71.533	42.6115	42.3613	24.4823	23.1305	13.417	12.0184
52.54	138.014	136.637	101.633	106.117	69.1762	71.6982	42.721	42.5388	24.5611	23.2542	13.4725	12.0933
53.54	138.124	136.638	101.755	106.161	69.3165	71.8522	42.8208	42.7074	24.6327	23.3728	13.5266	12.1655
54.54	138.23	136.639	101.859	106.2	69.4437	71.9956	42.9045	42.8675	24.714	23.4864	13.5611	12.2349
55.54	138.344	136.64	101.985	106.235	69.545	72.1292	42.998	43.0196	24.7902	23.5953	13.5899	12.3017
56.54	138.444	136.64	102.1	106.266	69.6639	72.2537	43.0879	43.1641	24.8532	23.6997	13.6198	12.366
57.54	138.538	136.641	102.216	106.294	69.761	72.3696	43.1845	43.3012	24.9279	23.7996	13.6596	12.4279
58.54	138.638	136.641	102.328	106.319	69.8764	72.4776	43.2849	43.4315	25.0091	23.8954	13.7269	12.4874
59.54	138.75	136.642	102.427	106.341	69.9692	72.5782	43.3951	43.5553	25.0698	23.9872	13.7807	12.5446
60.54	138.832	136.642	102.529	106.361	70.067	72.6718	43.4662	43.6728	25.1106	24.0751	13.828	12.5997
61.54	138.924	136.642	102.643	106.379	70.1497	72.7591	43.5238	43.7843	25.1755	24.1594	13.8628	12.6527
62.54	139.032	136.642	102.747	106.395	70.2735	72.8403	43.5881	43.8903	25.219	24.2401	13.9142	12.7037
63.54	139.135	136.642	102.845	106.409	70.3911	72.916	43.6788	43.9909	25.2776	24.3174	13.9596	12.7528
64.54	139.231	136.643	102.923	106.421	70.5064	72.9864	43.7638	44.0864	25.3101	24.3915	14.011	12.8
65.54	139.283	136.643	102.955	106.433	70.5519	73.052	43.8226	44.177	25.3489	24.4625	14.0249	12.8454
66.54	139.314	136.643	103.045	106.443	70.5853	73.1131	43.8732	44.2631	25.4464	24.5305	14.0463	12.8891
67.54	139.417	136.643	103.176	106.452	70.6948	73.1699	43.9541	44.3449	25.5575	24.5957	14.1089	12.9312
68.54	139.556	136.643	103.285	106.46	70.8262	73.2229	44.0574	44.4225	25.6329	24.6581	14.1701	12.9716
69.54	139.669	136.643	103.385	106.467	70.9252	73.2722	44.1607	44.4961	25.6844	24.7178	14.2296	13.0106
70.54	139.778	136.643	103.47	106.473	71.0091	73.318	44.225	44.566	25.7266	24.7751	14.2788	13.048
71.54	139.894	136.643	103.559	106.479	71.0987	73.3608	44.3075	44.6324	25.7763	24.83	14.2991	13.084
72.54	140.018	136.643	103.663	106.484	71.1929	73.4005	44.3903	44.6954	25.8232	24.8825	14.3408	13.1187
73.54	140.12	136.643	103.751	106.489	71.2734	73.4376	44.4497	44.7552	25.8691	24.9328	14.3535	13.152
74.54	140.215	136.643	103.852	106.493	71.3585	73.472	44.5134	44.812	25.9205	24.981	14.4005	13.1841
75.54	140.312	136.643	103.952	106.496	71.43	73.5041	44.5797	44.8659	25.9787	25.0272	14.4303	13.2149
76.54	140.408	136.643	104.043	106.5	71.4967	73.534	44.6515	44.917	26.0125	25.0715	14.4687	13.2446
77.54	140.505	136.643	104.122	106.503	71.5568	73.5618	44.7033	44.9656	26.0505	25.1138	14.4979	13.2732
78.54	140.613	136.643	104.202	106.505	71.6249	73.5877	44.7591	45.0117	26.1189	25.1544	14.5295	13.3006
79.54	140.72	136.643	104.284	106.507	71.6912	73.6118	44.8256	45.0554	26.1442	25.1933	14.5596	13.3271
80.54	140.818	136.643	104.353	106.51	71.7622	73.6342	44.8729	45.0969	26.1836	25.2305	14.5867	13.3525
81.54	140.92	136.643	104.443	106.511	71.8202	73.6551	44.9254	45.1363	26.2242	25.2662	14.6065	13.3769
82.54	141.002	136.643	104.511	106.513	71.8957	73.6745	44.9744	45.1737	26.2444	25.3003	14.6469	13.4004
83.54	141.06	136.643	104.584	106.514	71.9452	73.6926	45.0145	45.2092	26.2635	25.3331	14.6552	13.4231
84.54	141.129	136.643	104.662	106.516	72.0152	73.7094	45.0463	45.2429	26.2753	25.3644	14.6731	13.4448
85.54	141.209	136.643	104.726	106.517	72.0565	73.7251	45.0822	45.2748	26.3024	25.3944	14.6928	13.4658
86.54	141.272	136.643	104.795	106.518	72.1066	73.7397	45.1156	45.3052	26.326	25.4232	14.7154	13.4859
87.54	141.35	136.643	104.864	106.519	72.1766	73.7532	45.1525	45.334	26.362	25.4507	14.7336	13.5053
88.54	141.43	136.643	104.938	106.52	72.2284	73.7659	45.1917	45.3613	26.3861	25.477	14.762	13.5239
89.54	141.517	136.643	104.997	106.521	72.2946	73.7776	45.2303	45.3872	26.4136	25.5023	14.7833	13.5419
90.54	141.592	136.643	105.054	106.521	72.3449	73.7886	45.2646	45.4118	26.443	25.5265	14.811	13.5591
91.54	141.657	136.643	105.104	106.522	72.3887	73.7988	45.3076	45.4352	26.4441	25.5496	14.8281	13.5757
92.54	141.721	136.643	105.164	106.522	72.4388	73.8082	45.343	45.4573	26.467	25.5718	14.8409	13.5917
93.54	141.77	136.643	105.214	106.523	72.4997	73.8171	45.3785	45.4784	26.4753	25.5931	14.8508	13.607
94.54	141.826	136.643	105.298	106.523	72.5511	73.8253	45.409	45.4983	26.4828	25.6134	14.8547	13.6218
95.54	141.895	136.643	105.353	106.524	72.6202	73.8329	45.4482	45.5172	26.5232	25.6329	14.871	13.636
96.54	141.974	136.643	105.429	106.524	72.6912	73.84	45.4958	45.5352	26.56	25.6516	14.8821	13.6497
97.54	142.045	136.643	105.485	106.524	72.7494	73.8467	45.5276	45.5523	26.5957	25.6694	14.8888	13.6628
98.54	142.111	136.643	105.54	106.524	72.7904	73.8528	45.5629	45.5685	26.62	25.6866	14.894	13.6755
99.54	142.151	136.643	105.585	106.525	72.8259	73.8586	45.5998	45.5838	26.6419	25.7029	14.906	13.6876
100.54	142.222	136.643	105.621	106.525	72.867	73.8639	45.6239	45.5984	26.663	25.7186	14.9125	13.6993
101.54	142.279	136.643	105.672	106.525	72.8857	73.8689	45.669	45.6122	26.6831	25.7337	14.916	13.7106
102.54	142.349	136.643	105.712	106.525	72.9191	73.8735	45.7018	45.6253	26.6944	25.7481	14.9205	13.7214
103.54	142.398	136.643	105.761	106.525	72.9672	73.8778	45.7342	45.6378	26.7234	25.7619	14.9505	13.7318
104.54	142.435	136.643	105.8	106.526	72.9971	73.8818	45.7557	45.6496	26.7348	25.7751	14.9674	13.7418
105.54	142.483	136.643	105.846	106.526	73.0213	73.8855	45.7835	45.6608	26.7663	25.7877	14.9916	13.7515
106.54	142.526	136.643	105.889	106.526	73.065	73.889	45.8074	45.6715	26.7806	25.7998	15.0178	13.7607
107.54	142.544	136.643	105.939	106.526	73.1031	73.8922	45.8397	45.6816	26.7823	25.8114	15.0291	13.7696
108.54	142.597	136.643	105.979	106.526	73.1278	73.8952	45.8463	45.6911	26.793	25.8225	15.0203	13.7782
109.54	142.637	136.643	106.001	106.526	73.1659	73.898	45.8749	45.7002	26.812	25.8332	15.0142	13.7865
110.54	142.673	136.643	106.048	106.526	73.2082	73.9006	45.8821	45.7089	26.831	25.8434	15.0213	13.7944
111.54	142.703	136.643	106.066	106.526	73.2354	73.9031	45.8821	45.717	26.8343	25.8531	15.0309	13.802
112.54	142.718	136.643	106.088	106.526	73.2453	73.9053	45.892	45.7248	26.8402	25.8624	15.0301	13.8094
113.54	142.755	136.643	106.109	106.526	73.256	73.9074	45.8954	45.7322	26.8329	25.8714	15.0304	13.8164
114.54	142.774	136.643	106.108	106.526	73.2579	73.9094	45.903	45.7392	26.8215	25.88	15.047	13.8232
115.54	142.787	136.643	106.088	106.526	73.2629	73.9112	45.9161	45.7458	26.8232	25.8882	15.0208	13.8297
116.54	142.625	136.643	105.948	106.526	73.2724	73.9129	45.8907	45.7521	26.8307	25.896	15.0245	13.836
117.54	142.233	136.643	105.742	106.526	73.2199	73.9144	45.8187	45.7581	26.7955	25.9035	15.0343	13.8421
118.54	141.862	136.643	105.505	106.526	73.0493	73.9159	45.6965	45.7638	26.608	25.9107	14.9574	13.8479
119.54	141.716	136.643	109.145	106.527	72.3222	73.9173	45.3987	45.7691	27.2543	25.9174	14.5828	13.8535
120.54	141.002	133.281	96.1658	101.691	73.7183	72.8236	45.0252	44.7986	24.7259	24.9677	15.3741	13.7883
121.54	126.34	126.119	92.4971	96.8809	66.2559	69.7212	41.7911	43.0588	23.6708	24.0553	13.8228	13.3008
122.54	119.33	119.544	86.8245	92.3808	62.8386	66.7825	39.1921	41.3958	22.2188	23.1787	13.1792	12.8311
123.54	112.093	113.478	81.8322	88.1609	59.1688	63.9956	36.9643	39.8053	21.0664	22.3363	12.4225	12.3787
124.54	105.665	107.859	77.3385	84.1954	55.944	61.35	35.0377	38.2835	20.0624	21.5264	11.8696	11.9427
125.54	99.6856	102.634	73.0987	80.4622	52.9492	58.8361	33.2269	36.8268	19.0464	20.7479	11.3202	11.5227
126.54	94.2703	97.7619	69.2021	76.9416	50.2012	56.4452	31.5754	35.4318	18.0976	19.9992	10.7965	11.1179
127.54	89.3347	93.2058	65.6376	73.6165	47.6158	54.1694	30.0004	34.0955	17.2323	19.2791	10.3028	10.7278
128.54	84.6699	88.9352	62.2995	70.4717	45.292	52.0016	28.5795	32.8147	16.4531	18.5863	9.79284	10.3517
129.54	80.3276	84.9237	59.2225	67.4937	43.1005	49.9351	27.2698	31.587	15.6902	17.9199	9.33979	9.98931
130.54	76.3849	81.1483	56.439	64.6703	41.0569	47.9638	26.0184	30.4095	15.0437	17.2786	8.86672	9.63992
131.54	72.8426	77.589	53.825	61.9908	39.2145	46.0824	24.8962	29.28	14.433	16.6614	8.56944	9.30309
132.54	69.4857	74.2283	51.3931	59.4452	37.5013	44.2855	23.8131	28.1962	13.8898	16.0673	8.2766	8.97834
133.54	66.3068	71.0507	49.1226	57.0247	35.8701	42.5684	22.8131	27.1559	13.3089	15.4954	7.94073	8.66522
134.54	63.2938	68.0422	46.9601	54.7211	34.3057	40.9269	21.8546	26.1571	12.7055	14.9447	7.58315	8.36329
135.54	60.5632	65.1906	44.9261	52.5273	32.8135	39.3567	20.9306	25.1979	12.22	14.4145	7.26944	8.07212
136.54	58.0094	62.4848	43.1076	50.4363	31.4895	37.8542	20.0418	24.2765	11.7678	13.9039	6.99764	7.79133
137.54	55.6273	59.9146	41.4277	48.4421	30.2213	36.4157	19.3299	23.3913	11.3575	13.4121	6.73121	7.52052
138.54	53.392	57.4712	39.783	46.5389	29.0988	35.0381	18.6443	22.5405	10.9592	12.9383	6.55252	7.25933
139.54	51.2911	55.1463	38.2444	44.7216	27.9454	33.7181	17.9286	21.7228	10.5413	12.482	6.33327	7.00739
140.54	49.3286	52.9323	36.8311	42.9853	26.9102	32.4531	17.281	20.9367	10.2067	12.0423	6.11405	6.76437
141.54	47.4499	50.8224	35.4512	41.3255	25.9334	31.2401	16.706	20.1807	9.92355	11.6186	5.91084	6.52995
142.54	45.7117	48.8105	34.1767	39.7381	25.0364	30.0769	16.131	19.4537	9.56074	11.2103	5.73459	6.30379
143.54	44.1335	46.8906	32.9949	38.2192	24.1731	28.9608	15.5746	18.7544	9.23018	10.8168	5.54397	6.08561
144.54	42.5882	45.0575	31.8476	36.7652	23.3941	27.8898	15.0964	18.0815	8.91288	10.4376	5.37541	5.87511
145.54	41.1351	43.3062	30.7856	35.3728	22.6157	26.8618	14.5715	17.4341	8.66971	10.0721	5.24506	5.67201
146.54	39.7715	41.6323	29.7814	34.0389	21.8681	25.8747	14.14	16.8111	8.41208	9.7197	5.06419	5.47605
147.54	38.481	40.0316	28.781	32.7605	21.205	24.9266	13.7569	16.2114	8.16506	9.38	4.90128	5.28696
148.54	37.2674	38.5001	27.8822	31.535	20.5275	24.0159	13.3933	15.6341	7.94898	9.0525	4.77729	5.10449
149.54	36.1168	37.0341	27.0763	30.3597	19.9335	23.1408	13.0142	15.0783	7.7362	8.73672	4.65553	4.92842
150.54	35.0411	35.6304	26.2651	29.2322	19.34	22.2999	12.6317	14.5432	7.54129	8.43224	4.51842	4.7585
151.54	34.0355	34.2857	25.5202	28.1503	18.7747	21.4914	12.283	14.0278	7.3664	8.13862	4.41565	4.59452
152.54	33.0923	32.9971	24.8212	27.1118	18.2834	20.7142	11.9731	13.5314	7.16269	7.85546	4.34311	4.43627
153.54	32.2257	31.7618	24.1726	26.1147	17.8333	19.9668	11.6342	13.0533	6.96992	7.58237	4.23479	4.28353
154.54	31.3383	30.5772	23.5212	25.1572	17.3286	19.2479	11.3292	12.5927	6.76491	7.31898	4.14119	4.13611
155.54	30.4558	29.4409	22.8792	24.2374	16.8555	18.5564	11.0573	12.149	6.58633	7.06493	4.02697	3.99383
156.54	29.6544	28.3506	22.2666	23.3537	16.4204	17.8911	10.7551	11.7214	6.4316	6.81988	3.92741	3.8565
157.54	28.897	27.3041	21.7295	22.5045	16.0273	17.2508	10.4984	11.3094	6.27365	6.58349	3.84003	3.72394
158.54	28.16	26.2994	21.2171	21.6881	15.6723	16.6347	10.2766	10.9123	6.1809	6.35545	3.74372	3.59598
159.54	27.5003	25.3346	20.7305	20.9033	15.3174	16.0416	10.0548	10.5296	6.0458	6.13544	3.66077	3.47247
160.54	26.8982	24.4078	20.2727	20.1487	14.9648	15.4706	9.83759	10.1608	5.94417	5.92319	3.58404	3.35324
161.54	26.2941	23.5174	19.8428	19.4229	14.6422	14.9209	9.62252	9.80523	5.83594	5.7184	3.52423	3.23814
162.54	25.7617	22.6618	19.4039	18.7247	14.3334	14.3916	9.43697	9.46246	5.7485	5.52081	3.44323	3.12703
163.54	25.2263	21.8394	18.9669	18.053	14.0519	13.8818	9.24443	9.132	5.60414	5.33015	3.39002	3.01976
164.54	24.6598	21.0488	18.5638	17.4067	13.7622	13.3908	9.06455	8.81338	5.48027	5.14617	3.34248	2.91621
165.54	24.1704	20.2885	18.231	16.7847	13.4638	12.9178	8.88989	8.50615	5.37996	4.96864	3.2813	2.81623
166.54	23.6758	19.5574	17.8916	16.186	13.1658	12.4622	8.72974	8.2099	5.28854	4.79732	3.2403	2.71971
167.54	23.246	18.8541	17.5584	15.6096	12.9544	12.0232	8.56298	7.9242	5.19706	4.63198	3.20373	2.62653
168.54	22.8266	18.1775	17.243	15.0548	12.7487	11.6002	8.41201	7.64867	5.10085	4.47242	3.1515	2.53656
169.54	22.3658	17.5265	16.924	14.5205	12.5073	11.1926	8.26005	7.38293	4.99085	4.31842	3.08337	2.44969
170.54	21.9799	16.9	16.6408	14.0059	12.2907	10.7998	8.12763	7.12661	4.90726	4.16979	3.02323	2.36582
171.54	21.6295	16.297	16.3437	13.5104	12.1058	10.4212	8.01572	6.87938	4.85042	4.02634	2.98045	2.28484
172.54	21.2299	15.7165	16.0563	13.033	11.8818	10.0562	7.88584	6.64088	4.80328	3.88787	2.96119	2.20665
173.54	20.8998	15.1576	15.8076	12.5732	11.6976	9.70445	7.77295	6.41082	4.76195	3.75422	2.94823	2.13115
174.54	20.59	14.6195	15.5805	12.1301	11.5362	9.3653	7.68256	6.18886	4.7044	3.62522	2.91875	2.05825
175.54	20.2883	14.1013	15.3202	11.7032	11.3689	9.03832	7.59009	5.97473	4.63555	3.50069	2.89345	1.98786
176.54	19.9867	13.6022	15.1255	11.2919	11.1911	8.72305	7.49111	5.76813	4.59433	3.38048	2.84311	1.91989
177.54	19.702	13.1215	14.9405	10.8955	11.053	8.41906	7.41107	5.56879	4.54838	3.26444	2.8021	1.85425
178.54	19.4325	12.6584	14.7357	10.5134	10.9054	8.12591	7.30748	5.37645	4.49239	3.15241	2.77169	1.79087
179.54	19.1702	12.2123	14.5088	10.1451	10.7528	7.8432	7.21826	5.19085	4.42031	3.04427	2.74213	1.72967
180.54	18.9142	11.7824	14.3115	9.79013	10.6116	7.57055	7.12173	5.01175	4.3885	2.93987	2.70409	1.67057
181.54	18.6873	11.3682	14.1044	9.44791	10.4981	7.30758	7.03197	4.83892	4.33305	2.83908	2.70251	1.6135
182.54	18.4302	10.969	13.9346	9.11797	10.3625	7.05394	6.95283	4.67213	4.273	2.74177	2.6824	1.55838
183.54	18.1681	10.5843	13.7736	8.79985	10.2479	6.80927	6.85646	4.51117	4.21312	2.64782	2.65213	1.50516
184.54	17.9579	10.2134	13.6141	8.49311	10.1105	6.57326	6.77122	4.35582	4.17151	2.55711	2.62218	1.45377
185.54	17.7262	9.85598	13.4466	8.19732	9.99676	6.34557	6.6899	4.20588	4.11317	2.46954	2.5838	1.40413
186.54	17.5112	9.51139	13.3071	7.91207	9.88326	6.12592	6.61377	4.06117	4.06066	2.38498	2.54506	1.3562
187.54	17.3075	9.17917	13.1559	7.63697	9.76781	5.914	6.53697	3.9215	4.01186	2.30334	2.523	1.30991
188.54	17.1355	8.85886	13.0488	7.37164	9.66434	5.70953	6.48529	3.78668	3.99621	2.22451	2.48545	1.2652
189.54	16.9468	8.55001	12.9117	7.11573	9.55295	5.51225	6.42013	3.65655	3.9414	2.1484	2.4683	1.22203
190.54	16.7549	8.25219	12.7707	6.86888	9.4371	5.32189	6.35912	3.53093	3.91963	2.07491	2.44874	1.18033
191.54	16.5793	7.96499	12.6411	6.63075	9.32974	5.13821	6.30556	3.40967	3.88769	2.00394	2.43154	1.14006
192.54	16.4156	7.68801	12.5214	6.40104	9.25598	4.96095	6.26986	3.29262	3.85773	1.93542	2.40978	1.10117
193.54	16.2628	7.42087	12.4002	6.17943	9.18967	4.7899	6.20864	3.17962	3.8101	1.86925	2.39194	1.06361
194.54	16.1284	7.16321	12.2912	5.96563	9.11091	4.62482	6.14724	3.07054	3.78812	1.80535	2.37322	1.02734
195.54	15.992	6.91468	12.1823	5.75935	9.04683	4.46551	6.10396	2.96522	3.74098	1.74365	2.34176	0.992304
196.54	15.8398	6.67494	12.0834	5.56032	8.97648	4.31175	6.03216	2.86356	3.71244	1.68407	2.30327	0.958469
197.54	15.7113	6.44367	11.9714	5.36827	8.87817	4.16335	5.97642	2.7654	3.67102	1.62654	2.26642	0.92579
198.54	15.5705	6.22055	11.8641	5.18296	8.77398	4.02012	5.94302	2.67064	3.64354	1.57098	2.24123	0.894228
199.54	15.4386	6.0053	11.7616	5.00414	8.6784	3.88188	5.89212	2.57914	3.6182	1.51732	2.20477	0.863744
200.54	15.3138	5.79763	11.6473	4.83158	8.61335	3.74843	5.84907	2.49081	3.59514	1.46551	2.18377	0.834303
201.54	15.1928	5.59725	11.5731	4.66504	8.55145	3.61963	5.80903	2.40552	3.56175	1.41547	2.15849	0.805867
202.54	15.0926	5.40391	11.4924	4.50433	8.50023	3.49529	5.75825	2.32317	3.55768	1.36715	2.14428	0.778403
203.54	15.0069	5.21735	11.4116	4.34922	8.42902	3.37527	5.71243	2.24366	3.53906	1.32048	2.14962	0.751876
204.54	14.8938	5.03733	11.35	4.19951	8.37952	3.25941	5.66782	2.16689	3.52974	1.27542	2.13307	0.726256
205.54	14.7934	4.8636	11.2651	4.05502	8.3249	3.14756	5.62743	2.09276	3.49401	1.23189	2.14084	0.70151
206.54	14.7034	4.69595	11.1974	3.91556	8.25215	3.03959	5.57759	2.02118	3.48617	1.18986	2.12431	0.677609
207.54	14.6041	4.53415	11.1327	3.78095	8.2057	2.93535	5.56392	1.95206	3.45936	1.14926	2.12464	0.654524
208.54	14.4883	4.378	11.0485	3.65102	8.16278	2.83471	5.51966	1.88532	3.41582	1.11006	2.10763	0.632227
209.54	14.3992	4.2273	10.982	3.52559	8.11015	2.73755	5.48384	1.82087	3.39881	1.0722	2.0644	0.610691
210.54	14.3068	4.08184	10.9169	3.40452	8.06256	2.64375	5.45184	1.75864	3.36272	1.03563	2.04822	0.589889
211.54	14.208	3.94145	10.84	3.28764	8.01692	2.55318	5.42154	1.69854	3.34645	1.00031	2.02513	0.569798
212.54	14.1303	3.80593	10.7749	3.17482	7.95405	2.46574	5.40345	1.64051	3.32881	0.9662	2.00862	0.550392
213.54	14.0301	3.67513	10.7212	3.0659	7.9099	2.38132	5.38759	1.58447	3.33699	0.933257	1.99552	0.531647
214.54	13.9744	3.54887	10.6617	2.96075	7.87888	2.29981	5.37119	1.53036	3.33011	0.90144	2.00272	0.513542
215.54	13.9015	3.42699	10.5923	2.85924	7.83247	2.2211	5.34497	1.47809	3.31145	0.87071	1.99201	0.496055
216.54	13.8191	3.30934	10.539	2.76123	7.79367	2.1451	5.32025	1.42763	3.29694	0.84103	1.97995	0.479164
217.54	13.7556	3.19576	10.4815	2.66661	7.77264	2.07172	5.2999	1.37889	3.2889	0.812365	1.96971	0.462848
218.54	13.6858	3.08612	10.4029	2.57526	7.73444	2.00087	5.27607	1.33182	3.27999	0.784678	1.96236	0.447089
219.54	13.613	2.98027	10.362	2.48705	7.68434	1.93245	5.23794	1.28636	3.2605	0.757938	1.95935	0.431867
220.54	13.5478	2.87808	10.3152	2.40189	7.65656	1.86638	5.20122	1.24246	3.25002	0.73211	1.95225	0.417165
221.54	13.4891	2.77942	10.2904	2.31967	7.61912	1.80259	5.18212	1.20007	3.25769	0.707165	1.96029	0.402963
222.54	13.4473	2.68417	10.2613	2.24028	7.58762	1.74098	5.14283	1.15912	3.25797	0.683071	1.97298	0.389245
223.54	13.382	2.59221	10.2127	2.16362	7.55336	1.68149	5.12396	1.11958	3.23932	0.659799	1.97077	0.375995
224.54	13.3237	2.50343	10.1722	2.08961	7.53366	1.62405	5.09579	1.08139	3.23089	0.637322	1.95936	0.363196
225.54	13.2724	2.4177	10.1216	2.01813	7.49607	1.56857	5.05888	1.04451	3.22132	0.615612	1.95096	0.350833
226.54	13.2023	2.33493	10.0908	1.94912	7.47311	1.515	5.02783	1.00889	3.20839	0.594643	1.93303	0.338892
227.54	13.1315	2.25502	10.0233	1.88248	7.44184	1.46326	5.00201	0.974486	3.18129	0.574389	1.90115	0.327357
228.54	13.0804	2.17785	9.96295	1.81813	7.40491	1.4133	4.97486	0.941259	3.17233	0.554826	1.85964	0.316216
229.54	13.0371	2.10334	9.93799	1.75599	7.36842	1.36506	4.95166	0.909168	3.16816	0.535931	1.8424	0.305454
230.54	12.9932	2.0314	9.88459	1.69599	7.33068	1.31846	4.92646	0.878174	3.13468	0.51768	1.83643	0.295058
231.54	12.9294	1.96193	9.86108	1.63805	7.28841	1.27346	4.89286	0.84824	3.11772	0.500051	1.80463	0.285017
232.54	12.8756	1.89485	9.8407	1.58209	7.28364	1.23001	4.88392	0.819328	3.10055	0.483023	1.79275	0.275317
233.54	12.8441	1.83008	9.81501	1.52806	7.26624	1.18804	4.87037	0.791404	3.08932	0.466577	1.79226	0.265948
234.54	12.8058	1.76753	9.78428	1.47587	7.23795	1.14751	4.85146	0.764433	3.08788	0.45069	1.81174	0.256898
235.54	12.7595	1.70713	9.74666	1.42548	7.21983	1.10836	4.82119	0.738384	3.07339	0.435346	1.8099	0.248156
236.54	12.7132	1.6488	9.71482	1.37682	7.18685	1.07055	4.80497	0.713224	3.04999	0.420524	1.8008	0.239712
237.54	12.6609	1.59248	9.67256	1.32982	7.13638	1.03404	4.78513	0.688923	3.04999	0.406208	1.78752	0.231555
238.54	12.6219	1.53809	9.62255	1.28443	7.09966	0.99878	4.75607	0.665452	3.04062	0.39238	1.76564	0.223677
239.54	12.6119	1.48556	9.58763	1.2406	7.06913	0.964722	4.77064	0.642782	3.03849	0.379023	1.75963	0.216066
240.54	12.5976	1.43483	9.58083	1.19827	7.06374	0.93183	4.76321	0.620886	3.05937	0.366121	1.78011	0.208714

## Sheet: biotin-C3d ISG65
Cycle: 1 ISG65WT 10000 nM_X	Cycle: 1 ISG65WT 10000 nM_Y	Fitted Cycle: 1 ISG65WT 10000 _Y	Cycle: 2 ISG65WT 5000 nM_Y	Fitted Cycle: 2 ISG65WT 5000 n_Y	Cycle: 3 ISG65WT 2500 nM_Y	Fitted Cycle: 3 ISG65WT 2500 n_Y	Cycle: 4 ISG65WT 1250 nM_Y	Fitted Cycle: 4 ISG65WT 1250 n_Y	Cycle: 5 ISG65WT 625 nM_Y	Fitted Cycle: 5 ISG65WT 625 nM_Y	Cycle: 6 ISG65WT 312.5 nM_Y	Fitted Cycle: 6 ISG65WT 312.5 _Y
-60.38	-0.364014	0	-0.669067	0	-0.781616	0	-0.519409	0	-0.459351	0	-0.217896	0
-59.38	-0.348389	0	-0.687622	0	-0.773804	0	-0.524292	0	-0.477906	0	-0.218872	0
-58.38	-0.343701	0	-0.688794	0	-0.783179	0	-0.528198	0	-0.477124	0	-0.239184	0
-57.38	-0.328857	0	-0.679809	0	-0.789429	0	-0.530151	0	-0.458374	0	-0.226684	0
-56.38	-0.307373	0	-0.670044	0	-0.787475	0	-0.532104	0	-0.460327	0	-0.226684	0
-55.38	-0.296436	0	-0.679615	0	-0.793726	0	-0.533081	0	-0.458179	0	-0.217115	0
-54.38	-0.280029	0	-0.671997	0	-0.801147	0	-0.543823	0	-0.460327	0	-0.228637	0
-53.38	-0.277294	0	-0.639965	0	-0.779272	0	-0.537964	0	-0.440014	0	-0.227465	0
-52.38	-0.268311	0	-0.636841	0	-0.762085	0	-0.534058	0	-0.446656	0	-0.218872	0
-51.38	-0.27417	0	-0.639771	0	-0.779663	0	-0.536987	0	-0.467163	0	-0.227661	0
-50.38	-0.287842	0	-0.638794	0	-0.783569	0	-0.532104	0	-0.475952	0	-0.228638	0
-49.38	-0.276123	0	-0.622192	0	-0.77771	0	-0.527222	0	-0.449584	0	-0.235473	0
-48.38	-0.276123	0	-0.581176	0	-0.748413	0	-0.497925	0	-0.430053	0	-0.215942	0
-47.38	-0.240967	0	-0.570434	0	-0.719116	0	-0.483276	0	-0.409546	0	-0.197387	0
-46.38	-0.235107	0	-0.569458	0	-0.711304	0	-0.478394	0	-0.408569	0	-0.188599	0
-45.38	-0.22456	0	-0.559887	0	-0.697241	0	-0.457886	0	-0.389233	0	-0.186449	0
-44.38	-0.201904	0	-0.557739	0	-0.680054	0	-0.447144	0	-0.377319	0	-0.155396	0
-43.38	-0.188232	0	-0.558716	0	-0.668335	0	-0.442261	0	-0.36853	0	-0.164184	0
-42.38	-0.18042	0	-0.575318	0	-0.676148	0	-0.466675	0	-0.404664	0	-0.147584	0
-41.38	-0.194092	0	-0.579224	0	-0.699585	0	-0.47644	0	-0.406616	0	-0.17688	0
-40.38	-0.155029	0	-0.549926	0	-0.695678	0	-0.466675	0	-0.410522	0	-0.184692	0
-39.38	-0.118701	0	-0.471851	0	-0.703882	0	-0.462769	0	-0.407398	0	-0.178052	0
-38.38	-0.293896	0	-0.807568	0	-0.58396	0	-0.379761	0	-0.316235	0	-0.190356	0
-37.38	-1.08601	0	-1.35579	0	-0.889381	0	-0.662109	0	-0.574294	0	-0.117117	0
-36.38	-1.19343	0	-1.29121	0	-1.26572	0	-0.779541	0	-0.570872	0	-0.345749	0
-35.38	-1.11157	0	-1.28943	0	-1.2019	0	-0.803955	0	-0.602784	0	-0.330323	0
-34.38	-1.11316	0	-1.2901	0	-1.18347	0	-0.820496	0	-0.624084	0	-0.414123	0
-33.38	-1.0623	0	-1.23338	0	-1.14419	0	-0.815125	0	-0.582628	0	-0.456431	0
-32.38	-0.996019	0	-1.17845	0	-1.10671	0	-0.800598	0	-0.563341	0	-0.442638	0
-31.38	-0.932177	0	-1.14208	0	-1.07937	0	-0.77594	0	-0.548449	0	-0.415172	0
-30.38	-0.888037	0	-1.10398	0	-1.04607	0	-0.771729	0	-0.538061	0	-0.412255	0
-29.38	-0.838622	0	-1.03125	0	-1.02209	0	-0.740479	0	-0.503173	0	-0.409178	0
-28.38	-0.767089	0	-0.959472	0	-0.956909	0	-0.682495	0	-0.472045	0	-0.381347	0
-27.38	-0.702392	0	-0.906127	0	-0.900024	0	-0.646729	0	-0.436645	0	-0.364501	0
-26.38	-0.657885	0	-0.841601	0	-0.838525	0	-0.592651	0	-0.393237	0	-0.341503	0
-25.38	-0.58789	0	-0.77655	0	-0.755371	0	-0.540466	0	-0.364441	0	-0.32257	0
-24.38	-0.546875	0	-0.714722	0	-0.683594	0	-0.492798	0	-0.323486	0	-0.291382	0
-23.38	-0.505273	0	-0.665369	0	-0.610303	0	-0.433167	0	-0.281091	0	-0.268836	0
-22.38	-0.467627	0	-0.606726	0	-0.542285	0	-0.39093	0	-0.258337	0	-0.232263	0
-21.38	-0.417871	0	-0.540491	0	-0.482251	0	-0.346985	0	-0.23446	0	-0.228796	0
-20.38	-0.373779	0	-0.480713	0	-0.42688	0	-0.295166	0	-0.212524	0	-0.203003	0
-19.38	-0.327417	0	-0.415734	0	-0.365918	0	-0.26825	0	-0.188195	0	-0.17362	0
-18.38	-0.280883	0	-0.358459	0	-0.30371	0	-0.231506	0	-0.16217	0	-0.142394	0
-17.38	-0.226659	0	-0.280797	0	-0.246875	0	-0.202942	0	-0.113683	0	-0.0946884	0
-16.38	-0.188452	0	-0.236364	0	-0.184863	0	-0.187317	0	-0.110266	0	-0.0585568	0
-15.38	-0.164794	0	-0.180297	0	-0.167846	0	-0.174072	0	-0.104614	0	-0.0554192	0
-14.38	-0.133544	0	-0.11328	0	-0.126098	0	-0.131714	0	-0.0587146	0	-0.043089	0
-13.38	-0.0824944	0	-0.0602166	0	-0.0779293	0	-0.0811157	0	-0.0271355	0	-0.0172963	0
-12.38	-0.0557368	0	-0.0352289	0	-0.0512448	0	-0.0467529	0	0.00444391	0	7.40737e-05	0
-11.38	-0.0356196	0	-0.0167598	0	-0.0275144	0	-0.015686	0	0.00667773	0	0.00296704	0
-10.38	-0.00393015	0	0.00546926	0	-0.00703099	0	0.0162354	0	0.0177984	0	0.00344315	0
-9.38	0.0183599	0	0.016956	0	0.00197778	0	0.0465698	0	0.0258672	0	0.00477367	0
-8.38	0.0302986	0	0.0541633	0	0.0138675	0	0.0497437	0	0.0349983	0	0.0124889	0
-7.38	0.0582036	0	0.0772466	0	0.0300784	0	0.0438232	0	0.0193853	0	0.011866	0
-6.38	0.0729988	0	0.095948	0	0.0629886	0	0.0593262	0	0.0251472	0	0.000611424	0
-5.38	0.113868	0	0.126014	0	0.102955	0	0.0822144	0	0.0251841	0	0.031337	0
-4.38	0.152566	0	0.156961	0	0.1563	0	0.125366	0	0.0369655	0	0.0315225	0
-3.38	0.14883	0	0.0798607	0	0.140821	0	0.128784	0	0.101711	0	0.045145	0
-2.38	0.14643	0	0.206306	0	0.118137	0	0.0778198	0	0.0340647	0	0.0323288	0
-1.38	0.600435	0	0.41147	0	0.321214	0	0.239258	0	0.174043	0	0.106707	0
-0.380005	-0.866038	0	-2.26979	1.31536	0.697596	0	-0.375549	0	-0.480235	0.164864	0.430496	0
0.619995	6.98451	12.9374	13.3551	11.4811	-0.480888	2.2678	1.10779	1.92104	1.94264	1.471	-0.769324	0.21796
1.62	40.4557	30.8814	26.6169	20.3544	8.73393	7.26306	5.1554	4.37536	3.47714	2.66356	0.743783	0.86093
2.62	60.391	45.7585	37.5728	28.0996	15.5991	11.7368	8.89551	6.60191	5.20281	3.75244	1.5375	1.44989
3.62	74.3783	58.0929	45.5463	34.86	21.5211	15.7436	12.0004	8.62184	6.67998	4.74665	2.53605	1.98937
4.62	83.7089	68.3192	51.3104	40.7609	26.0053	19.332	14.4715	10.4543	7.86775	5.65441	3.35817	2.48353
5.62	90.1963	76.7977	55.558	45.9116	29.4449	22.5459	16.4442	12.1167	8.83339	6.48324	3.9056	2.93618
6.62	95.0172	83.8271	58.9269	50.4074	32.2632	25.4242	18.0685	13.6249	9.68228	7.24001	4.42158	3.3508
7.62	98.6474	89.6551	61.5627	54.3316	34.4456	28.0021	19.4154	14.9931	10.3864	7.93098	4.88149	3.73059
8.62	101.366	94.487	63.4921	57.7569	36.2672	30.3108	20.4019	16.2343	10.8939	8.56187	5.23681	4.07848
9.62	103.495	98.493	65.0981	60.7467	37.6833	32.3786	21.2497	17.3604	11.4052	9.13791	5.50933	4.39715
10.62	105.182	101.814	66.4196	63.3563	38.7792	34.2304	21.9664	18.3819	11.8314	9.66386	5.79253	4.68904
11.62	106.585	104.568	67.5392	65.6342	39.7533	35.889	22.5928	19.3086	12.1674	10.1441	6.05535	4.95641
12.62	107.633	106.851	68.3458	67.6225	40.562	37.3744	23.0704	20.1494	12.5036	10.5826	6.20622	5.20132
13.62	108.524	108.744	69.0197	69.358	41.2057	38.7047	23.4408	20.9121	12.7545	10.9829	6.36037	5.42566
14.62	109.249	110.313	69.6324	70.8728	41.6786	39.8962	23.7616	21.604	12.9474	11.3484	6.49567	5.63115
15.62	109.899	111.615	70.163	72.1951	42.1851	40.9632	24.0693	22.2318	13.1424	11.6822	6.60715	5.81938
16.62	110.451	112.693	70.5974	73.3492	42.6108	41.9189	24.3995	22.8013	13.3188	11.9869	6.73308	5.9918
17.62	110.937	113.588	71.0268	74.3566	42.9438	42.7748	24.6964	23.3179	13.4459	12.2652	6.85675	6.14973
18.62	111.365	114.329	71.4251	75.2359	43.2284	43.5414	24.9479	23.7866	13.6237	12.5192	6.94991	6.2944
19.62	111.805	114.944	71.7109	76.0034	43.5279	44.2279	25.1443	24.2118	13.7052	12.7512	7.05643	6.42691
20.62	112.17	115.454	71.9609	76.6733	43.7746	44.8428	25.2761	24.5975	13.7917	12.963	7.16118	6.54829
21.62	112.484	115.876	72.1339	77.2581	43.9253	45.3934	25.3659	24.9474	13.8503	13.1564	7.17054	6.65947
22.62	112.812	116.227	72.3902	77.7685	44.0968	45.8866	25.4745	25.2649	13.9401	13.3329	7.17877	6.76132
23.62	113.103	116.517	72.6619	78.214	44.2877	46.3283	25.6706	25.5529	14.0416	13.4941	7.22294	6.85461
24.62	113.35	116.758	72.8228	78.6029	44.4856	46.7239	25.7782	25.8142	14.0978	13.6413	7.30554	6.94006
25.62	113.621	116.958	72.9609	78.9423	44.6897	47.0782	25.8583	26.0512	14.1498	13.7757	7.30775	7.01833
26.62	113.863	117.123	73.1676	79.2386	44.8248	47.3955	25.9337	26.2662	14.2257	13.8984	7.29543	7.09003
27.62	114.068	117.26	73.39	79.4972	44.9215	47.6797	26.037	26.4613	14.3005	14.0105	7.29996	7.1557
28.62	114.279	117.374	73.5611	79.723	45.04	47.9342	26.1093	26.6383	14.351	14.1128	7.33005	7.21586
29.62	114.452	117.469	73.7234	79.92	45.1689	48.1622	26.1768	26.7988	14.399	14.2062	7.3472	7.27096
30.62	114.714	117.547	73.8698	80.092	45.2728	48.3663	26.2617	26.9445	14.4177	14.2915	7.40465	7.32144
31.62	114.903	117.612	74.0136	80.2421	45.3959	48.5492	26.3362	27.0766	14.4326	14.3693	7.47374	7.36767
32.62	115.099	117.665	74.1619	80.3731	45.5305	48.7129	26.4009	27.1965	14.4779	14.4404	7.51025	7.41002
33.62	115.26	117.71	74.3133	80.4875	45.633	48.8596	26.4817	27.3053	14.5609	14.5053	7.52207	7.44881
34.62	115.415	117.747	74.4167	80.5873	45.716	48.9909	26.5973	27.4039	14.6021	14.5646	7.54165	7.48435
35.62	115.603	117.778	74.5664	80.6745	45.8563	49.1086	26.7103	27.4934	14.6453	14.6187	7.56175	7.5169
36.62	115.784	117.803	74.7661	80.7505	45.9841	49.2139	26.8094	27.5746	14.6965	14.6681	7.61035	7.54671
37.62	115.956	117.824	74.9277	80.8169	46.0679	49.3083	26.8766	27.6483	14.7487	14.7133	7.66617	7.57402
38.62	116.139	117.842	75.0327	80.8749	46.1769	49.3928	26.9211	27.7151	14.7721	14.7545	7.71316	7.59904
39.62	116.292	117.856	75.1478	80.9254	46.2615	49.4684	26.975	27.7757	14.7856	14.7921	7.70532	7.62195
40.62	116.455	117.868	75.2739	80.9696	46.3572	49.5362	27.0475	27.8307	14.822	14.8264	7.68071	7.64294
41.62	116.643	117.878	75.4006	81.0081	46.5005	49.5969	27.1317	27.8806	14.8889	14.8578	7.71246	7.66217
42.62	116.845	117.886	75.5322	81.0418	46.5975	49.6513	27.1993	27.9259	14.9514	14.8864	7.76068	7.67978
43.62	117.018	117.893	75.66	81.0711	46.6707	49.7	27.3069	27.9669	14.9979	14.9125	7.78931	7.69591
44.62	117.191	117.899	75.8083	81.0968	46.8038	49.7436	27.3685	28.0042	15.0593	14.9364	7.81411	7.71068
45.62	117.363	117.903	75.9426	81.1191	46.9502	49.7827	27.4559	28.038	15.1015	14.9582	7.86299	7.72422
46.62	117.492	117.907	76.0339	81.1386	47.0456	49.8176	27.5266	28.0686	15.1167	14.9781	7.88102	7.73662
47.62	117.623	117.911	76.1436	81.1557	47.1215	49.849	27.5836	28.0965	15.1262	14.9963	7.88452	7.74797
48.62	117.758	117.913	76.2622	81.1706	47.2184	49.877	27.625	28.1217	15.1501	15.0129	7.90325	7.75838
49.62	117.902	117.915	76.3919	81.1835	47.2891	49.9022	27.7051	28.1446	15.2115	15.028	7.91377	7.7679
50.62	118.061	117.917	76.5378	81.1949	47.3688	49.9247	27.8279	28.1653	15.2592	15.0418	7.96772	7.77663
51.62	118.238	117.919	76.6907	81.2048	47.474	49.9448	27.9169	28.1842	15.3191	15.0545	7.97628	7.78463
52.62	118.388	117.92	76.8039	81.2134	47.5859	49.9629	27.9615	28.2013	15.3454	15.066	7.98721	7.79195
53.62	118.505	117.921	76.9223	81.2209	47.6814	49.979	28.0181	28.2168	15.361	15.0765	8.0175	7.79866
54.62	118.651	117.922	77.0391	81.2275	47.7738	49.9935	28.0942	28.2308	15.3978	15.0861	8.02618	7.8048
55.62	118.772	117.923	77.1683	81.2333	47.8623	50.0065	28.1766	28.2436	15.4486	15.0949	8.08195	7.81043
56.62	118.901	117.923	77.2989	81.2383	47.9527	50.0181	28.2381	28.2552	15.4974	15.1029	8.11344	7.81559
57.62	119.054	117.924	77.4286	81.2427	48.0493	50.0285	28.304	28.2657	15.5486	15.1102	8.15515	7.82031
58.62	119.19	117.924	77.5172	81.2465	48.1601	50.0378	28.367	28.2752	15.5768	15.1169	8.20875	7.82464
59.62	119.345	117.925	77.6134	81.2498	48.2457	50.0462	28.4338	28.2839	15.5843	15.123	8.20745	7.8286
60.62	119.48	117.925	77.7202	81.2527	48.3352	50.0536	28.4851	28.2917	15.6179	15.1286	8.2227	7.83223
61.62	119.605	117.925	77.8295	81.2553	48.4257	50.0603	28.5395	28.2988	15.6669	15.1337	8.24269	7.83555
62.62	119.737	117.925	77.9647	81.2575	48.4967	50.0663	28.618	28.3053	15.7087	15.1383	8.24652	7.8386
63.62	119.897	117.925	78.0742	81.2594	48.5778	50.0717	28.7138	28.3111	15.7742	15.1425	8.27699	7.84139
64.62	120.068	117.926	78.1477	81.2611	48.6843	50.0765	28.8029	28.3164	15.7757	15.1464	8.30485	7.84394
65.62	120.116	117.926	78.2473	81.2626	48.7891	50.0808	28.8762	28.3213	15.8214	15.1499	8.31968	7.84628
66.62	120.157	117.926	78.3454	81.2639	48.8376	50.0846	28.892	28.3256	15.8806	15.1532	8.36367	7.84843
67.62	120.199	117.926	78.4316	81.265	48.9065	50.0881	28.9132	28.3296	15.9045	15.1561	8.37556	7.85039
68.62	120.225	117.926	78.5173	81.266	48.9651	50.0912	28.9597	28.3332	15.9313	15.1588	8.39401	7.85219
69.62	120.283	117.926	78.5714	81.2668	49.0204	50.094	29.0015	28.3364	15.9433	15.1613	8.4317	7.85384
70.62	120.371	117.926	78.616	81.2676	49.093	50.0964	29.0458	28.3394	15.972	15.1635	8.45061	7.85535
71.62	120.461	117.926	78.6734	81.2682	49.1544	50.0987	29.1044	28.3421	16.0079	15.1655	8.4683	7.85673
72.62	120.549	117.926	78.7453	81.2688	49.2179	50.1007	29.1418	28.3445	16.0618	15.1674	8.48756	7.85799
73.62	120.643	117.926	78.8209	81.2693	49.2797	50.1024	29.1932	28.3467	16.0978	15.1691	8.52997	7.85915
74.62	120.722	117.926	78.9074	81.2697	49.3188	50.104	29.2466	28.3487	16.1468	15.1707	8.51333	7.86022
75.62	120.82	117.926	78.9629	81.2701	49.3801	50.1055	29.2881	28.3506	16.1634	15.1721	8.54502	7.86119
76.62	120.897	117.926	79.0419	81.2704	49.4309	50.1067	29.3258	28.3522	16.1802	15.1734	8.55586	7.86208
77.62	120.971	117.926	79.11	81.2707	49.4699	50.1079	29.3585	28.3537	16.1924	15.1746	8.5566	7.8629
78.62	121.064	117.926	79.1872	81.271	49.5226	50.1089	29.3849	28.3551	16.1911	15.1757	8.55596	7.86365
79.62	121.134	117.926	79.2662	81.2712	49.5734	50.1098	29.4182	28.3563	16.2083	15.1767	8.56509	7.86433
80.62	121.214	117.926	79.3697	81.2714	49.6364	50.1107	29.473	28.3574	16.2447	15.1776	8.56947	7.86496
81.62	121.331	117.926	79.4792	81.2715	49.717	50.1114	29.5317	28.3584	16.2858	15.1784	8.60897	7.86553
82.62	121.452	117.926	79.5708	81.2717	49.8035	50.1121	29.6105	28.3594	16.3313	15.1791	8.64645	7.86606
83.62	121.575	117.926	79.6519	81.2718	49.9094	50.1127	29.6674	28.3602	16.3632	15.1798	8.68637	7.86654
84.62	121.698	117.926	79.7187	81.2719	49.9783	50.1132	29.7354	28.361	16.3812	15.1805	8.70442	7.86699
85.62	121.797	117.926	79.7921	81.272	50.044	50.1137	29.782	28.3616	16.4059	15.181	8.70936	7.86739
86.62	121.914	117.926	79.8924	81.2721	50.1108	50.1141	29.8195	28.3623	16.4361	15.1816	8.72513	7.86776
87.62	122.025	117.926	79.9958	81.2722	50.1824	50.1145	29.8692	28.3628	16.4689	15.182	8.74769	7.8681
88.62	122.12	117.926	80.1014	81.2722	50.2541	50.1148	29.9136	28.3633	16.4962	15.1825	8.76836	7.86841
89.62	122.207	117.926	80.1929	81.2723	50.3179	50.1151	29.9659	28.3638	16.5173	15.1829	8.79089	7.8687
90.62	122.297	117.926	80.3048	81.2723	50.401	50.1154	30.0076	28.3642	16.5505	15.1832	8.79808	7.86896
91.62	122.403	117.926	80.4028	81.2724	50.4933	50.1156	30.0599	28.3646	16.5592	15.1836	8.84022	7.8692
92.62	122.482	117.926	80.4972	81.2724	50.569	50.1158	30.1201	28.365	16.5928	15.1839	8.85597	7.86942
93.62	122.555	117.926	80.5617	81.2725	50.6435	50.116	30.1716	28.3653	16.6065	15.1841	8.87113	7.86962
94.62	122.637	117.926	80.6384	81.2725	50.6981	50.1162	30.2068	28.3656	16.626	15.1844	8.87452	7.8698
95.62	122.727	117.926	80.7181	81.2725	50.7473	50.1164	30.2626	28.3658	16.6442	15.1846	8.87654	7.86997
96.62	122.811	117.926	80.799	81.2725	50.7853	50.1165	30.2997	28.3661	16.6559	15.1848	8.88428	7.87012
97.62	122.91	117.926	80.897	81.2726	50.847	50.1166	30.3311	28.3663	16.6918	15.185	8.879	7.87026
98.62	122.989	117.926	80.9839	81.2726	50.9092	50.1168	30.3771	28.3665	16.7214	15.1852	8.88574	7.87039
99.62	123.084	117.926	81.0563	81.2726	50.9816	50.1169	30.4302	28.3666	16.7372	15.1854	8.91138	7.87051
100.62	123.185	117.926	81.1383	81.2726	51.0419	50.1169	30.481	28.3668	16.7551	15.1855	8.92273	7.87062
101.62	123.277	117.926	81.2142	81.2726	51.1058	50.117	30.5558	28.3669	16.803	15.1856	8.95142	7.87072
102.62	123.367	117.926	81.3136	81.2726	51.1829	50.1171	30.6084	28.3671	16.8245	15.1858	8.97253	7.87081
103.62	123.47	117.926	81.4108	81.2726	51.2367	50.1172	30.6891	28.3672	16.8692	15.1859	8.99288	7.87089
104.62	123.553	117.926	81.4925	81.2726	51.3199	50.1172	30.7414	28.3673	16.9018	15.186	9.03068	7.87097
105.62	123.643	117.926	81.562	81.2726	51.3739	50.1173	30.7651	28.3674	16.9205	15.1861	9.04443	7.87104
106.62	123.738	117.926	81.6347	81.2726	51.4328	50.1173	30.8099	28.3675	16.9425	15.1862	9.05497	7.8711
107.62	123.82	117.926	81.7134	81.2727	51.4913	50.1174	30.8387	28.3676	16.99	15.1862	9.06299	7.87116
108.62	123.92	117.926	81.7853	81.2727	51.5618	50.1174	30.8769	28.3676	17.013	15.1863	9.07294	7.87122
109.62	123.998	117.926	81.8577	81.2727	51.6173	50.1174	30.9056	28.3677	17.0449	15.1864	9.09183	7.87127
110.62	124.076	117.926	81.9054	81.2727	51.6896	50.1175	30.944	28.3678	17.055	15.1864	9.0942	7.87131
111.62	124.148	117.926	81.9812	81.2727	51.7335	50.1175	30.9864	28.3678	17.0811	15.1865	9.09403	7.87135
112.62	124.206	117.926	82.0324	81.2727	51.7968	50.1175	31.019	28.3679	17.0921	15.1865	9.1293	7.87139
113.62	124.251	117.926	82.0921	81.2727	51.8327	50.1175	31.0743	28.3679	17.1304	15.1866	9.13494	7.87142
114.62	124.312	117.926	82.1668	81.2727	51.8968	50.1176	31.1393	28.368	17.1789	15.1866	9.15879	7.87146
115.62	124.371	117.926	82.3245	81.2727	51.9625	50.1176	31.1855	28.368	17.2512	15.1867	9.18841	7.87149
116.62	124.47	117.926	82.4389	81.2727	52.0912	50.1176	31.3028	28.368	17.325	15.1867	9.23566	7.87151
117.62	124.526	117.926	82.5041	81.2727	52.2058	50.1176	31.3641	28.3681	17.3031	15.1867	9.30193	7.87154
118.62	124.583	117.926	82.8324	81.2727	52.3002	50.1176	31.3517	28.3681	17.4009	15.1867	9.29653	7.87156
119.62	132.752	117.926	82.7178	81.2727	54.8664	50.1176	33.5787	28.3681	17.2522	15.0335	9.46581	7.87158
120.62	108.115	112.855	68.4381	74.685	47.167	48.3696	26.6191	26.9197	14.5073	13.8149	8.93699	7.72656
121.62	96.513	103.707	60.154	68.6314	42.0564	44.449	24.6407	24.7377	12.9725	12.6952	7.90383	7.10027
122.62	83.6319	95.3014	52.5595	63.0684	36.6792	40.8461	21.6162	22.7326	11.5295	11.6661	7.0216	6.52475
123.62	73.2672	87.5766	46.4178	57.9563	32.3805	37.5353	19.3038	20.89	10.3714	10.7205	6.27255	5.99588
124.62	64.8595	80.478	41.5017	53.2586	28.9742	34.4928	17.4377	19.1967	9.44881	9.85157	5.66595	5.50988
125.62	57.9999	73.9548	37.3263	48.9417	26.0623	31.697	15.8699	17.6407	8.69323	9.05305	5.19424	5.06327
126.62	52.3548	67.9603	33.8997	44.9747	23.7374	29.1278	14.5562	16.2108	8.06577	8.31924	4.83818	4.65286
127.62	47.5684	62.4518	30.9903	41.3292	21.7808	26.7668	13.3922	14.8969	7.4602	7.64492	4.53871	4.27572
128.62	43.5868	57.3897	28.569	37.9792	20.0662	24.5972	12.4757	13.6894	7.04236	7.02525	4.23768	3.92915
129.62	40.2449	52.7379	26.5929	34.9008	18.7186	22.6034	11.734	12.5798	6.69834	6.45582	3.97903	3.61066
130.62	37.4365	48.4632	24.8705	32.0719	17.5178	20.7713	11.1055	11.5601	6.35138	5.93253	3.80451	3.318
131.62	35.0276	44.535	23.3971	29.4723	16.4351	19.0877	10.5396	10.6231	6.09593	5.45167	3.63846	3.04905
132.62	32.9132	40.9251	22.1817	27.0834	15.6673	17.5405	10.0302	9.76202	5.85038	5.00977	3.52792	2.80191
133.62	31.1673	37.6079	21.1269	24.8881	14.9843	16.1187	9.66559	8.97075	5.62797	4.6037	3.42404	2.5748
134.62	29.6858	34.5596	20.2084	22.8708	14.356	14.8122	9.32135	8.24362	5.47521	4.23054	3.24794	2.36609
135.62	28.3586	31.7583	19.3578	21.017	13.836	13.6116	8.98987	7.57543	5.31939	3.88763	3.17696	2.17431
136.62	27.2401	29.1841	18.685	19.3134	13.3552	12.5083	8.71289	6.96139	5.13142	3.57251	3.08501	1.99807
137.62	26.2474	26.8186	18.135	17.7479	12.8975	11.4944	8.49713	6.39713	5.03971	3.28294	2.98776	1.83611
138.62	25.3801	24.6448	17.5854	16.3094	12.5799	10.5627	8.28857	5.87861	4.9343	3.01684	2.96377	1.68728
139.62	24.6353	22.6472	17.1979	14.9874	12.2882	9.70656	8.1275	5.40211	4.86537	2.7723	2.94298	1.55052
140.62	24.0094	20.8115	16.7765	13.7726	12.0056	8.91978	7.93158	4.96424	4.78063	2.54759	2.91017	1.42484
141.62	23.4283	19.1246	16.4033	12.6562	11.7748	8.19678	7.83325	4.56185	4.69151	2.34109	2.85537	1.30935
142.62	22.9481	17.5744	16.0858	11.6304	11.5665	7.53239	7.73395	4.19209	4.63385	2.15133	2.83124	1.20322
143.62	22.5036	16.1499	15.8167	10.6877	11.3692	6.92184	7.63831	3.85229	4.56731	1.97695	2.79951	1.10569
144.62	22.0976	14.8409	15.6405	9.82136	11.186	6.36079	7.56079	3.54004	4.55769	1.81671	2.75506	1.01606
145.62	21.7698	13.6379	15.4606	9.02528	11.0932	5.84521	7.5094	3.2531	4.56094	1.66945	2.74082	0.933706
146.62	21.4928	12.5325	15.3028	8.29373	11.0047	5.37142	7.45062	2.98941	4.55192	1.53413	2.75949	0.858023
147.62	21.2302	11.5167	15.1145	7.62148	10.8762	4.93603	7.39227	2.7471	4.49572	1.40978	2.77614	0.788475
148.62	20.8953	10.5832	14.9583	7.00371	10.7701	4.53593	7.33765	2.52443	4.4198	1.29551	2.73096	0.724564
149.62	20.6694	9.72534	14.7939	6.43602	10.6972	4.16827	7.27466	2.31981	4.34502	1.1905	2.69795	0.665834
150.62	20.4374	8.93704	14.6421	5.91434	10.5978	3.8304	7.22437	2.13178	4.31279	1.094	2.65999	0.611864
151.62	20.2643	8.21264	14.5286	5.43495	10.5161	3.51993	7.20068	1.95898	4.28091	1.00533	2.62229	0.562268
152.62	20.1269	7.54696	14.4508	4.99441	10.4554	3.23461	7.16699	1.8002	4.26363	0.923841	2.6115	0.516693
153.62	19.959	6.93523	14.3835	4.58958	10.4003	2.97243	7.15308	1.65428	4.25689	0.848958	2.61629	0.474812
154.62	19.7822	6.37309	14.2912	4.21757	10.3362	2.7315	7.12207	1.52019	4.21372	0.780144	2.63516	0.436325
155.62	19.6397	5.85651	14.2166	3.87571	10.2831	2.51009	7.07056	1.39697	4.18965	0.716909	2.61358	0.400959
156.62	19.5224	5.38181	14.1208	3.56156	10.239	2.30663	7.04279	1.28374	4.15087	0.658799	2.58644	0.368458
157.62	19.3948	4.94558	14.0745	3.27287	10.2054	2.11967	7.00934	1.17968	4.15377	0.605399	2.55814	0.338593
158.62	19.2751	4.54471	14.035	3.00759	10.1974	1.94785	6.98938	1.08406	4.15686	0.556328	2.56824	0.311148
159.62	19.1886	4.17633	14.0037	2.7638	10.1599	1.78997	6.96204	0.99619	4.1626	0.511234	2.57727	0.285927
160.62	19.1139	3.83781	13.9353	2.53978	10.1175	1.64488	6.92914	0.915443	4.17147	0.469795	2.60587	0.262751
161.62	19.0281	3.52674	13.8671	2.33391	10.0902	1.51155	6.91431	0.841241	4.19317	0.431715	2.59871	0.241453
162.62	18.9431	3.24087	13.8166	2.14474	10.091	1.38903	6.90875	0.773053	4.19467	0.396722	2.60734	0.221882
163.62	18.86	2.97818	13.7683	1.97089	10.0781	1.27644	6.89532	0.710392	4.19674	0.364565	2.61466	0.203897
164.62	18.7742	2.73678	13.7293	1.81114	10.0483	1.17298	6.88861	0.65281	4.18319	0.335015	2.59696	0.18737
165.62	18.6992	2.51495	13.6946	1.66433	10.0115	1.0779	6.87286	0.599896	4.1695	0.30786	2.57977	0.172182
166.62	18.6529	2.31109	13.6657	1.52943	9.98831	0.99053	6.86731	0.551271	4.16643	0.282906	2.5583	0.158226
167.62	18.6154	2.12377	13.6171	1.40546	9.96765	0.910242	6.86792	0.506587	4.16663	0.259975	2.57263	0.145401
168.62	18.5476	1.95162	13.5834	1.29154	9.93384	0.836461	6.86243	0.465525	4.16577	0.238902	2.57849	0.133615
169.62	18.4996	1.79343	13.5571	1.18685	9.92454	0.76866	6.85187	0.427791	4.15907	0.219538	2.60314	0.122785
170.62	18.4404	1.64806	13.5248	1.09065	9.91887	0.706356	6.85089	0.393116	4.14823	0.201743	2.60775	0.112832
171.62	18.3885	1.51448	13.5212	1.00225	9.89851	0.649101	6.85187	0.361251	4.15426	0.18539	2.61808	0.103687
172.62	18.3411	1.39172	13.5064	0.921007	9.92483	0.596487	6.84351	0.33197	4.14934	0.170363	2.62617	0.0952821
173.62	18.2839	1.27891	13.4832	0.846354	9.91895	0.548138	6.84937	0.305062	4.16358	0.156554	2.62012	0.0875589
174.62	18.2275	1.17525	13.4585	0.777752	9.91628	0.503708	6.85034	0.280334	4.16826	0.143865	2.63496	0.0804617
175.62	18.1843	1.07999	13.4636	0.71471	9.91077	0.46288	6.83948	0.257612	4.18469	0.132203	2.62988	0.0739398
176.62	18.1478	0.992446	13.4211	0.656778	9.9042	0.42536	6.82068	0.236731	4.17339	0.121487	2.6252	0.0679465
177.62	18.0842	0.912002	13.3815	0.603542	9.85784	0.390882	6.78876	0.217542	4.15336	0.11164	2.60763	0.062439
178.62	18.0436	0.838079	13.3471	0.554622	9.83452	0.359199	6.76447	0.199909	4.15177	0.102591	2.57614	0.057378
179.62	17.9957	0.770147	13.328	0.509666	9.80591	0.330084	6.74524	0.183705	4.14075	0.0942754	2.53662	0.0527271
180.62	17.9514	0.707722	13.299	0.468354	9.78303	0.303328	6.73138	0.168815	4.13302	0.0866338	2.52592	0.0484533
181.62	17.9233	0.650357	13.3046	0.430391	9.76023	0.278742	6.72913	0.155131	4.13069	0.0796116	2.52691	0.0445258
182.62	17.8862	0.597641	13.2889	0.395505	9.75676	0.256148	6.72778	0.142557	4.11301	0.0731586	2.5563	0.0409167
183.62	17.8414	0.549199	13.2762	0.363447	9.73621	0.235385	6.71106	0.131002	4.1073	0.0672286	2.56726	0.0376002
184.62	17.8249	0.504683	13.2411	0.333988	9.71785	0.216306	6.70844	0.120383	4.10946	0.0617793	2.58427	0.0345524
185.62	17.7883	0.463775	13.2296	0.306916	9.72585	0.198773	6.7077	0.110625	4.11119	0.0567717	2.58693	0.0317518
186.62	17.7439	0.426183	13.2095	0.282038	9.69653	0.182661	6.69525	0.101658	4.09076	0.05217	2.59454	0.0291781
187.62	17.7352	0.391638	13.2086	0.259177	9.68215	0.167855	6.69733	0.0934184	4.11644	0.0479413	2.57936	0.026813
188.62	17.727	0.359894	13.1892	0.23817	9.69563	0.15425	6.72028	0.0858463	4.113	0.0440554	2.59574	0.0246397
189.62	17.7055	0.330722	13.1632	0.218864	9.676	0.141747	6.7179	0.0788879	4.10713	0.0404844	2.60662	0.0226425
190.62	17.6631	0.303915	13.1447	0.201124	9.65266	0.130257	6.70856	0.0724936	4.10946	0.0372029	2.60233	0.0208071
191.62	17.6292	0.279281	13.1168	0.184822	9.62397	0.119699	6.70148	0.0666175	4.0964	0.0341874	2.61381	0.0191206
192.62	17.5978	0.256643	13.1228	0.169841	9.5957	0.109997	6.69971	0.0612177	4.10706	0.0314163	2.60474	0.0175707
193.62	17.5751	0.235841	13.0973	0.156074	9.57424	0.101081	6.6958	0.0562557	4.1082	0.0288698	2.60554	0.0161465
194.62	17.5557	0.216724	13.0977	0.143423	9.5644	0.0928877	6.69562	0.0516958	4.11923	0.0265297	2.60551	0.0148378
195.62	17.5357	0.199158	13.0844	0.131798	9.54424	0.0853585	6.7038	0.0475055	4.11637	0.0243793	2.60519	0.0136351
196.62	17.534	0.183015	13.0645	0.121115	9.52339	0.0784397	6.69525	0.0436549	4.11105	0.0224032	2.57584	0.0125299
197.62	17.516	0.16818	13.0563	0.111298	9.522	0.0720817	6.70715	0.0401164	4.11284	0.0205873	2.55781	0.0115142
198.62	17.4684	0.154548	13.014	0.102276	9.52615	0.066239	6.69568	0.0368647	4.09319	0.0189186	2.54365	0.0105809
199.62	17.4129	0.142021	12.9877	0.0939863	9.50474	0.0608699	6.68433	0.0338766	4.07136	0.0173851	2.51751	0.00972328
200.62	17.3925	0.130509	12.9774	0.0863681	9.49214	0.055936	6.67584	0.0311307	4.08114	0.0159759	2.50651	0.00893515
201.62	17.3604	0.119931	12.9412	0.0793674	9.4814	0.0514021	6.6701	0.0286074	4.07406	0.014681	2.51481	0.0082109
202.62	17.3199	0.11021	12.9116	0.0729342	9.47229	0.0472356	6.66089	0.0262886	4.05493	0.013491	2.49524	0.00754536
203.62	17.2936	0.101276	12.8865	0.0670224	9.44585	0.0434069	6.65326	0.0241577	4.04081	0.0123975	2.48507	0.00693376
204.62	17.2754	0.0930673	12.885	0.0615899	9.43518	0.0398885	6.64722	0.0221996	4.04907	0.0113926	2.48584	0.00637173
205.62	17.2612	0.0855237	12.8942	0.0565976	9.41575	0.0366553	6.65076	0.0204002	4.06489	0.0104691	2.50518	0.00585526
206.62	17.2525	0.0785914	12.9127	0.05201	9.43926	0.0336841	6.66736	0.0187466	4.0853	0.00962055	2.50784	0.00538066
207.62	17.2371	0.0722211	12.9254	0.0477943	9.46223	0.0309538	6.67706	0.0172271	4.09921	0.00884074	2.53251	0.00494452
208.62	17.2244	0.0663671	12.9244	0.0439203	9.45442	0.0284448	6.6767	0.0158307	4.10641	0.00812414	2.53471	0.00454374
209.62	17.21	0.0609877	12.8976	0.0403603	9.4521	0.0261392	6.67444	0.0145475	4.10928	0.00746563	2.54526	0.00417544
210.62	17.1739	0.0560442	12.8614	0.0370888	9.44832	0.0240204	6.66309	0.0133684	4.09414	0.0068605	2.53257	0.00383699
211.62	17.1524	0.0515015	12.8359	0.0340825	9.41594	0.0220734	6.64594	0.0122848	4.09013	0.00630441	2.51888	0.00352598
212.62	17.1147	0.047327	12.8095	0.0313199	9.41631	0.0202842	6.62286	0.011289	4.07975	0.0057934	2.51241	0.00324018
213.62	17.076	0.0434908	12.807	0.0287813	9.39426	0.0186401	6.6178	0.010374	4.07722	0.00532381	2.48906	0.00297754
214.62	17.063	0.0399656	12.8077	0.0264484	9.38452	0.0171292	6.61432	0.0095331	4.08136	0.00489228	2.49518	0.00273619
215.62	17.0526	0.0367262	12.7962	0.0243045	9.35344	0.0157408	6.61163	0.00876038	4.0712	0.00449573	2.47885	0.00251441
216.62	17.0268	0.0337493	12.7972	0.0223345	9.35166	0.0144649	6.60828	0.0080503	4.05293	0.00413132	2.46624	0.0023106
217.62	17.0153	0.0310137	12.7955	0.0205242	9.35166	0.0132924	6.6098	0.00739777	4.0674	0.00379645	2.47448	0.00212331
218.62	16.999	0.0284998	12.7918	0.0188606	9.34866	0.012215	6.60022	0.00679813	4.05217	0.00348873	2.47444	0.0019512
219.62	16.9766	0.0261898	12.7704	0.0173318	9.32483	0.0112249	6.58459	0.0062471	4.05054	0.00320594	2.46668	0.00179305
220.62	16.9546	0.0240669	12.7587	0.0159269	9.31243	0.010315	6.58185	0.00574074	4.05826	0.00294608	2.47531	0.00164771
221.62	16.9297	0.0221161	12.7414	0.014636	9.30862	0.00947893	6.5697	0.00527541	4.05266	0.00270728	2.47419	0.00151415
222.62	16.9104	0.0203235	12.7106	0.0134496	9.28398	0.00871061	6.55841	0.00484781	4.0496	0.00248784	2.47555	0.00139142
223.62	16.8923	0.0186761	12.6951	0.0123594	9.25344	0.00800456	6.54303	0.00445486	4.06993	0.00228619	2.47535	0.00127864
224.62	16.8826	0.0171623	12.6689	0.0113576	9.25012	0.00735574	6.5592	0.00409377	4.07971	0.00210088	2.47351	0.001175
225.62	16.8501	0.0157712	12.649	0.010437	9.25015	0.00675951	6.54858	0.00376194	4.06255	0.00193059	2.4825	0.00107976
226.62	16.8085	0.0144929	12.6423	0.00959104	9.25178	0.00621161	6.5379	0.00345702	4.07748	0.0017741	2.46793	0.000992234
227.62	16.7876	0.0133181	12.6073	0.00881363	9.25649	0.00570812	6.56183	0.0031768	4.06066	0.0016303	2.48085	0.000911808
228.62	16.7704	0.0122386	12.5953	0.00809923	9.26028	0.00524544	6.56323	0.0029193	4.06975	0.00149815	2.47529	0.0008379
229.62	16.7517	0.0112466	12.5967	0.00744274	9.27307	0.00482027	6.5509	0.00268268	4.06995	0.00137672	2.48181	0.000769983
230.62	16.7326	0.010335	12.5875	0.00683946	9.26174	0.00442955	6.55359	0.00246523	4.05999	0.00126513	2.503	0.000707571
231.62	16.7293	0.00949727	12.6035	0.00628508	9.25813	0.00407051	6.57074	0.00226541	4.08468	0.00116258	2.49992	0.000650218
232.62	16.7263	0.00872746	12.6094	0.00577563	9.24077	0.00374057	6.57562	0.00208178	4.09013	0.00106835	2.52035	0.000597514
233.62	16.7029	0.00802004	12.618	0.00530748	9.21411	0.00343737	6.56226	0.00191304	4.07971	0.000981751	2.53259	0.000549082
234.62	16.6815	0.00736997	12.6086	0.00487728	9.18647	0.00315875	6.56256	0.00175798	4.08785	0.000902174	2.53214	0.000504575
235.62	16.6635	0.00677258	12.6084	0.00448194	9.17041	0.00290272	6.56458	0.00161548	4.09937	0.000829047	2.52429	0.000463676
236.62	16.6442	0.00622362	12.5969	0.00411865	9.16992	0.00266743	6.56104	0.00148454	4.09302	0.000761847	2.52246	0.000426092
237.62	16.6311	0.00571916	12.5973	0.00378481	9.1717	0.00245122	6.54486	0.0013642	4.10116	0.000700095	2.52274	0.000391555
238.62	16.6187	0.00525559	12.585	0.00347803	9.17661	0.00225253	6.52679	0.00125363	4.0923	0.000643348	2.52367	0.000359817
239.62	16.5861	0.00482959	12.5594	0.00319611	9.15676	0.00206995	6.49481	0.00115201	4.07494	0.000591201	2.511	0.000330651
240.62	16.5614	0.00443812	12.5277	0.00293705	9.14001	0.00190217	6.44299	0.00105864	4.04639	0.00054328	2.49524	0.00030385

## Sheet: biotin-C3b ISG65ΔL2
Cycle: 12 ISG65dL2 10000 nM_X	Cycle: 12 ISG65dL2 10000 nM_Y	Fitted Cycle: 12 ISG65dL2 1000_Y	Cycle: 13 ISG65dL2 5000 nM_Y	Fitted Cycle: 13 ISG65dL2 5000_Y	Cycle: 14 ISG65dL2 2500 nM_Y	Fitted Cycle: 14 ISG65dL2 2500_Y	Cycle: 15 ISG65dL2 1250 nM_Y	Fitted Cycle: 15 ISG65dL2 1250_Y	Cycle: 16 ISG65dL2 625 nM_Y	Fitted Cycle: 16 ISG65dL2 625 _Y	Cycle: 17 ISG65dL2 312.5 nM_Y	Fitted Cycle: 17 ISG65dL2 312._Y
-59.36	0.169773	0	0.151173	0	0.13554	0	0.213917	0	0.240597	0	0.14645	0
-58.36	0.160007	0	0.158985	0	0.140423	0	0.204151	0	0.247433	0	0.14352	0
-57.36	0.149851	0	0.141798	0	0.146282	0	0.204151	0	0.250948	0	0.147036	0
-56.36	0.13657	0	0.137501	0	0.13261	0	0.172901	0	0.241573	0	0.137661	0
-55.36	0.140476	0	0.114064	0	0.137493	0	0.143604	0	0.240597	0	0.117153	0
-54.36	0.142429	0	0.129688	0	0.122845	0	0.143604	0	0.257198	0	0.104458	0
-53.36	0.13071	0	0.121876	0	0.127728	0	0.133839	0	0.250362	0	0.0878561	0
-52.36	0.113132	0	0.127735	0	0.108196	0	0.15337	0	0.234737	0	0.0917625	0
-51.36	0.111179	0	0.129688	0	0.0935478	0	0.133839	0	0.227901	0	0.0946921	0
-50.36	0.0877416	0	0.131642	0	0.0964775	0	0.133839	0	0.221065	0	0.0859029	0
-49.36	0.0893041	0	0.141798	0	0.0955009	0	0.15337	0	0.219698	0	0.0962545	0
-48.36	0.0799292	0	0.139454	0	0.0915947	0	0.165089	0	0.206417	0	0.0829734	0
-47.36	0.0795385	0	0.151564	0	0.0974541	0	0.15337	0	0.200167	0	0.0864888	0
-46.36	0.107273	0	0.145314	0	0.113079	0	0.155323	0	0.194698	0	0.100551	0
-45.36	0.124851	0	0.176564	0	0.137493	0	0.165089	0	0.217159	0	0.132778	0
-44.36	0.13657	0	0.194142	0	0.161907	0	0.194386	0	0.23376	0	0.149379	0
-43.36	0.13032	0	0.190626	0	0.177532	0	0.204151	0	0.250948	0	0.166567	0
-42.36	0.13071	0	0.209767	0	0.173626	0	0.196339	0	0.259151	0	0.17477	0
-41.36	0.111179	0	0.200001	0	0.173626	0	0.194386	0	0.249386	0	0.165005	0
-40.36	0.101414	0	0.198048	0	0.161907	0	0.194386	0	0.237667	0	0.145473	0
-39.36	0.0818824	0	0.188282	0	0.161907	0	0.194386	0	0.227901	0	0.133755	0
-38.36	0.138523	0	0.190235	0	0.152142	0	0.182667	0	0.20837	0	0.11227	0
-37.36	0.179386	0	0.246876	0	0.206829	0	0.192432	0	0.198604	0	0.092739	0
-36.36	0.487504	0	0.253676	0	0.289288	0	0.236179	0	0.316377	0	0.179262	0
-35.36	0.395772	0	0.294703	0	0.392063	0	0.33884	0	0.319685	0	0.246709	0
-34.36	0.373139	0	0.388431	0	0.289682	0	0.346729	0	0.262476	0	0.282702	0
-33.36	-0.396098	0	0.327361	0	0.259912	0	0.159073	0	0.16785	0	0.130813	0
-32.36	-0.31029	0	-0.47424	0	-0.556965	0	0.240482	0	0.0205356	0	0.0824024	0
-31.36	0.139343	0	-0.19606	0	-0.109146	0	-0.497181	0	-0.296864	0	-0.506245	0
-30.36	0.00991422	0	0.205322	0	0.100462	0	0.288448	0	0.219492	0	0.116514	0
-29.36	-0.134678	0	-0.0481987	0	-0.107895	0	0.0407181	0	-0.0211983	0	-0.0157356	0
-28.36	-0.171901	0	-0.135281	0	-0.162586	0	-0.0810852	0	-0.0988843	0	-0.109752	0
-27.36	-0.124976	0	-0.12869	0	-0.131998	0	-0.0949936	0	-0.0970814	0	-0.0994351	0
-26.36	-0.122589	0	-0.110371	0	-0.114809	0	-0.0717049	0	-0.0591447	0	-0.0779016	0
-25.36	-0.11896	0	-0.101423	0	-0.11919	0	-0.0754623	0	-0.0629408	0	-0.0751364	0
-24.36	-0.101257	0	-0.110219	0	-0.121649	0	-0.0688934	0	-0.0592663	0	-0.0537235	0
-23.36	-0.0988815	0	-0.119235	0	-0.0950851	0	-0.0767097	0	-0.0484474	0	-0.0492371	0
-22.36	-0.068434	0	-0.0941408	0	-0.0625114	0	-0.0556145	0	-0.0426085	0	-0.023474	0
-21.36	-0.0319335	0	-0.0468095	0	-0.037941	0	-0.0489769	0	-0.012635	0	-0.0067794	0
-20.36	-0.0205529	0	0.00986031	0	3.24249e-05	0	0.00297928	0	0.0256984	0	0.0284259	0
-19.36	-0.0203675	0	0.0420159	0	0.00757408	0	-0.00679016	0	0.0221759	0	0.0358402	0
-18.36	-0.0366324	0	0.059841	0	0.00909424	0	0.00797653	0	0.0317308	0	0.0309411	0
-17.36	-0.0641641	0	0.0302629	0	0.00097084	0	-0.0181923	0	0.0240412	0	0.0134898	0
-16.36	-0.0491199	0	0.025217	0	-0.00387573	0	-0.0410843	0	0.0142422	0	-0.0158405	0
-15.36	-0.0521961	0	0.0254054	0	0.00190544	0	-0.0342102	0	0.00538489	0	-0.0164962	0
-14.36	-0.0419292	0	0.00631523	0	0.0140953	0	-0.0297585	0	0.00385475	0	-0.0117779	0
-13.36	-0.0364956	0	0.00462759	0	0.0118675	0	-0.0181923	0	0.00644267	0	0.00721705	0
-12.36	-0.0150585	0	0.00279806	0	0.0117493	0	-0.0184288	0	0.00338557	0	0.00923731	0
-11.36	-0.00227002	0	-0.00834247	0	0.00698471	0	-0.0178032	0	-0.000316896	0	0.00717517	0
-10.36	0.00353591	0	-0.00571791	0	0.00999069	0	-0.0164757	0	-0.00423082	0	0.00818602	0
-9.35999	0.00834702	0	-0.00959443	0	0.00433159	0	-0.00835037	0	-0.0111785	0	0.00569009	0
-8.35999	0.0207071	0	0.00773143	0	0.0101452	0	-0.00679016	0	-0.000187865	0	-0.00417804	0
-7.35999	-0.00255404	0	0.013342	0	0.0248337	0	0.0112572	0	0.0145167	0	0.00365248	0
-6.35999	0.0166306	0	0.00736003	0	0.0331554	0	0.0114937	0	0.0203061	0	0.0163159	0
-5.35999	0.0274425	0	0.0287327	0	0.0328445	0	0.0389938	0	0.0333858	0	0.0271297	0
-4.35999	0.0442073	0	0.0286114	0	0.0296421	0	0.0540695	0	0.0478065	0	0.0451438	0
-3.35999	0.0210206	0	0.0464842	0	0.0265579	0	0.071804	0	0.0770776	0	0.0453546	0
-2.35999	-0.0184667	0	-0.0528567	0	-0.0506725	0	0.0506325	0	0.0228713	0	0.0709861	0
-1.35999	-0.00187218	0	-0.0912484	0	-0.100199	0	0.0310287	0	-0.0372554	0	0.0193776	0
-0.359985	0.375842	0	0.0729229	0	0.278082	0	0.101498	0	0.239747	0	0.23021	0
0.640015	-0.122954	22.0231	-2.6593	0	-3.35758	3.25459	-0.0628052	0	-1.44112	0.345217	-1.78683	0.17272
1.64001	39.3664	45.2757	12.2212	16.9876	10.7951	11.2979	1.0247	3.82726	3.21227	2.53894	3.15547	1.27591
2.64001	57.1908	59.5924	27.4106	29.1116	16.5635	17.4783	6.77227	7.52859	4.17628	4.32058	2.41729	2.18017
3.64001	68.1123	68.4071	38.1898	37.7644	22.707	22.2273	10.7114	10.4797	6.42799	5.76755	3.85705	2.92139
4.64001	74.0292	73.8343	44.7129	43.9399	26.814	25.8764	13.6449	12.8325	7.78796	6.94272	4.63452	3.52896
5.64001	77.3585	77.1758	48.7205	48.3473	29.5316	28.6804	15.6674	14.7085	8.8665	7.89714	5.17548	4.02698
6.64001	79.2712	79.2331	51.2379	51.4928	31.4662	30.835	17.1151	16.2042	9.60546	8.67227	5.43522	4.4352
7.64001	80.5159	80.4999	52.9354	53.7378	32.8755	32.4905	18.1261	17.3967	10.1933	9.30181	5.66802	4.76981
8.64001	81.3052	81.2798	54.116	55.34	33.8918	33.7627	18.9676	18.3475	10.6389	9.81309	5.90495	5.04408
9.64001	81.823	81.76	54.9149	56.4835	34.645	34.7402	19.5856	19.1056	10.9954	10.2283	6.11325	5.26891
10.64	82.1499	82.0556	55.4747	57.2996	35.2139	35.4913	20.1009	19.71	11.2665	10.5656	6.27657	5.4532
11.64	82.3541	82.2376	55.882	57.8821	35.6762	36.0684	20.4587	20.1919	11.4967	10.8395	6.3613	5.60426
12.64	82.5492	82.3497	56.2074	58.2978	35.9773	36.5119	20.797	20.5761	11.719	11.0619	6.49004	5.72808
13.64	82.6264	82.4188	56.4284	58.5944	36.2043	36.8526	21.0502	20.8824	11.8226	11.2426	6.5503	5.82957
14.64	82.713	82.4613	56.5151	58.8062	36.3876	37.1145	21.1924	21.1267	11.9341	11.3893	6.60436	5.91277
15.64	82.7688	82.4874	56.6314	58.9573	36.5615	37.3157	21.3021	21.3214	12.0446	11.5085	6.68239	5.98096
16.64	82.7694	82.5035	56.7236	59.0652	36.7009	37.4703	21.4163	21.4767	12.1393	11.6052	6.73141	6.03685
17.64	82.7658	82.5134	56.8635	59.1421	36.7972	37.5891	21.5322	21.6005	12.1713	11.6838	6.77835	6.08267
18.64	82.7854	82.5195	56.9291	59.1971	36.8603	37.6804	21.5881	21.6992	12.249	11.7477	6.80173	6.12022
19.64	82.833	82.5233	56.9717	59.2363	36.9445	37.7505	21.6549	21.7779	12.3136	11.7995	6.85999	6.15101
20.64	82.8918	82.5256	56.985	59.2643	36.9853	37.8044	21.7616	21.8406	12.3526	11.8416	6.89717	6.17624
21.64	82.9153	82.527	57.0778	59.2842	37.0416	37.8458	21.8249	21.8906	12.3929	11.8758	6.96557	6.19692
22.64	82.965	82.5279	57.1601	59.2985	37.1186	37.8777	21.8643	21.9305	12.4346	11.9036	6.99276	6.21387
23.64	82.9189	82.5284	57.1747	59.3086	37.1791	37.9021	21.9181	21.9623	12.5132	11.9261	7.01363	6.22777
24.64	82.9693	82.5287	57.2036	59.3159	37.2127	37.9209	21.9393	21.9876	12.5394	11.9445	7.02889	6.23916
25.64	83.0527	82.529	57.2935	59.3211	37.2354	37.9353	21.9967	22.0079	12.5872	11.9593	7.07973	6.24849
26.64	83.1123	82.5291	57.358	59.3248	37.3121	37.9464	22.0292	22.024	12.6496	11.9714	7.14226	6.25615
27.64	83.1383	82.5292	57.3792	59.3274	37.3582	37.9549	22.0389	22.0368	12.6606	11.9812	7.1683	6.26242
28.64	83.1968	82.5292	57.4207	59.3293	37.4226	37.9615	22.1159	22.0471	12.7054	11.9892	7.22255	6.26756
29.64	83.1912	82.5292	57.4868	59.3306	37.4569	37.9665	22.1912	22.0552	12.7525	11.9957	7.29387	6.27178
30.64	83.1505	82.5292	57.4893	59.3316	37.4836	37.9704	22.2335	22.0617	12.7418	12.0009	7.28489	6.27523
31.64	83.1712	82.5293	57.4819	59.3323	37.5139	37.9733	22.2448	22.0669	12.7306	12.0052	7.27398	6.27806
32.64	83.1826	82.5293	57.5163	59.3328	37.5661	37.9756	22.2248	22.0711	12.737	12.0087	7.28344	6.28038
33.64	83.2216	82.5293	57.5554	59.3331	37.5986	37.9774	22.2366	22.0744	12.7777	12.0115	7.33391	6.28229
34.64	83.2299	82.5293	57.6002	59.3334	37.6154	37.9787	22.292	22.077	12.807	12.0138	7.38782	6.28385
35.64	83.181	82.5293	57.628	59.3335	37.658	37.9798	22.3545	22.0791	12.83	12.0156	7.4042	6.28512
36.64	83.1772	82.5293	57.6298	59.3337	37.6939	37.9806	22.3545	22.0808	12.8233	12.0171	7.41556	6.28617
37.64	83.1602	82.5293	57.657	59.3338	37.7107	37.9812	22.3541	22.0821	12.8392	12.0183	7.41657	6.28703
38.64	83.1302	82.5293	57.662	59.3338	37.6962	37.9816	22.3561	22.0832	12.8323	12.0193	7.41001	6.28773
39.64	83.1809	82.5293	57.7016	59.3339	37.7084	37.982	22.3674	22.084	12.8544	12.0201	7.40087	6.28831
40.64	83.2305	82.5293	57.7027	59.3339	37.7257	37.9823	22.3956	22.0847	12.8737	12.0208	7.41864	6.28878
41.64	83.2622	82.5293	57.7398	59.3339	37.7582	37.9825	22.4131	22.0852	12.9035	12.0213	7.41911	6.28917
42.64	83.2626	82.5293	57.809	59.3339	37.782	37.9827	22.4413	22.0857	12.9196	12.0218	7.44653	6.28949
43.64	83.2525	82.5293	57.8471	59.3339	37.8066	37.9828	22.4573	22.086	12.9262	12.0221	7.46098	6.28975
44.64	83.2612	82.5293	57.8416	59.334	37.85	37.9829	22.4721	22.0863	12.9341	12.0224	7.47903	6.28996
45.64	83.2648	82.5293	57.8412	59.334	37.8734	37.983	22.5209	22.0865	12.9597	12.0226	7.50458	6.29014
46.64	83.2782	82.5293	57.8655	59.334	37.8875	37.983	22.5389	22.0867	12.9706	12.0228	7.50705	6.29028
47.64	83.2817	82.5293	57.8766	59.334	37.9079	37.9831	22.5502	22.0868	12.9927	12.023	7.52618	6.2904
48.64	83.2941	82.5293	57.9131	59.334	37.9347	37.9831	22.5736	22.0869	13.0113	12.0231	7.51999	6.2905
49.64	83.321	82.5293	57.9326	59.334	37.9682	37.9831	22.5945	22.087	13.0329	12.0232	7.53084	6.29058
50.64	83.3498	82.5293	57.9741	59.334	37.9955	37.9831	22.6111	22.0871	13.0518	12.0233	7.5655	6.29064
51.64	83.381	82.5293	58.0195	59.334	38.0141	37.9832	22.6597	22.0871	13.0773	12.0234	7.60236	6.29069
52.64	83.3888	82.5293	58.0477	59.334	38.0242	37.9832	22.6913	22.0872	13.1015	12.0234	7.61866	6.29074
53.64	83.4132	82.5293	58.0561	59.334	38.0442	37.9832	22.6975	22.0872	13.0951	12.0235	7.62713	6.29077
54.64	83.4424	82.5293	58.0748	59.334	38.0706	37.9832	22.7042	22.0872	13.097	12.0235	7.64035	6.2908
55.64	83.4663	82.5293	58.1157	59.334	38.1121	37.9832	22.7272	22.0873	13.1169	12.0235	7.67013	6.29083
56.64	83.4975	82.5293	58.1558	59.334	38.1529	37.9832	22.7432	22.0873	13.1268	12.0235	7.69789	6.29085
57.64	83.5237	82.5293	58.2049	59.334	38.1813	37.9832	22.7646	22.0873	13.1521	12.0236	7.70835	6.29086
58.64	83.5417	82.5293	58.2526	59.334	38.2095	37.9832	22.7886	22.0873	13.1715	12.0236	7.72967	6.29087
59.64	83.5447	82.5293	58.2823	59.334	38.2256	37.9832	22.8154	22.0873	13.1667	12.0236	7.73149	6.29089
60.64	83.5299	82.5293	58.2999	59.334	38.2443	37.9832	22.8069	22.0873	13.1545	12.0236	7.72055	6.29089
61.64	83.5484	82.5293	58.3067	59.334	38.2503	37.9832	22.7971	22.0873	13.1553	12.0236	7.71973	6.2909
62.64	83.58	82.5293	58.3252	59.334	38.278	37.9832	22.8041	22.0873	13.1728	12.0236	7.72565	6.29091
63.64	83.6038	82.5293	58.3619	59.334	38.308	37.9832	22.8296	22.0873	13.1902	12.0236	7.75818	6.29091
64.64	83.6182	82.5293	58.3706	59.334	38.3303	37.9832	22.8541	22.0873	13.2202	12.0236	7.74555	6.29092
65.64	83.5778	82.5293	58.3785	59.334	38.3779	37.9832	22.8921	22.0873	13.2306	12.0236	7.78537	6.29092
66.64	83.5753	82.5293	58.3812	59.334	38.4049	37.9832	22.8775	22.0873	13.2549	12.0236	7.79321	6.29092
67.64	83.5121	82.5293	58.3795	59.334	38.3638	37.9832	22.8725	22.0873	13.2589	12.0236	7.78271	6.29092
68.64	83.4223	82.5293	58.3447	59.334	38.3252	37.9832	22.8561	22.0873	13.2383	12.0236	7.76365	6.29093
69.64	83.3756	82.5293	58.318	59.334	38.3303	37.9832	22.8545	22.0873	13.2388	12.0236	7.78214	6.29093
70.64	83.3207	82.5293	58.3268	59.334	38.3189	37.9832	22.8741	22.0873	13.259	12.0236	7.8137	6.29093
71.64	83.2725	82.5293	58.2851	59.334	38.2753	37.9832	22.8577	22.0874	13.2331	12.0236	7.80577	6.29093
72.64	83.2073	82.5293	58.2488	59.334	38.2427	37.9832	22.817	22.0874	13.1798	12.0236	7.79154	6.29093
73.64	83.1573	82.5293	58.2288	59.334	38.2246	37.9832	22.776	22.0874	13.1651	12.0236	7.75897	6.29093
74.64	83.1107	82.5293	58.2134	59.334	38.2288	37.9832	22.7463	22.0874	13.152	12.0236	7.73602	6.29093
75.64	83.0881	82.5293	58.1938	59.334	38.2422	37.9832	22.7432	22.0874	13.149	12.0236	7.7413	6.29093
76.64	83.0865	82.5293	58.1841	59.334	38.2406	37.9832	22.7319	22.0874	13.1276	12.0236	7.76277	6.29093
77.64	83.0795	82.5293	58.2079	59.334	38.2232	37.9832	22.7401	22.0874	13.1231	12.0236	7.75789	6.29093
78.64	83.0854	82.5293	58.2177	59.334	38.2153	37.9832	22.7416	22.0874	13.1112	12.0236	7.77569	6.29093
79.64	83.1109	82.5293	58.2335	59.334	38.2103	37.9832	22.7577	22.0874	13.1186	12.0236	7.78428	6.29093
80.64	83.125	82.5293	58.2682	59.334	38.2299	37.9832	22.7842	22.0874	13.1265	12.0236	7.80071	6.29093
81.64	83.1199	82.5293	58.2796	59.334	38.2348	37.9832	22.8006	22.0874	13.1606	12.0236	7.83631	6.29093
82.64	83.1022	82.5293	58.2876	59.334	38.2317	37.9832	22.8022	22.0874	13.1867	12.0236	7.83596	6.29093
83.64	83.0835	82.5293	58.2981	59.334	38.215	37.9832	22.8053	22.0874	13.1994	12.0236	7.83885	6.29093
84.64	83.1089	82.5293	58.2923	59.334	38.2216	37.9832	22.7936	22.0874	13.2	12.0236	7.83121	6.29093
85.64	83.126	82.5293	58.3066	59.334	38.23	37.9832	22.7971	22.0874	13.2004	12.0236	7.83353	6.29093
86.64	83.1311	82.5293	58.311	59.334	38.2461	37.9832	22.7775	22.0874	13.1733	12.0236	7.8128	6.29093
87.64	83.1396	82.5293	58.3111	59.334	38.275	37.9832	22.7941	22.0874	13.1549	12.0236	7.81736	6.29093
88.64	83.1373	82.5293	58.3111	59.334	38.2914	37.9832	22.799	22.0874	13.1427	12.0236	7.8103	6.29093
89.64	83.1399	82.5293	58.3069	59.334	38.29	37.9832	22.7968	22.0874	13.1199	12.0236	7.79719	6.29093
90.64	83.146	82.5293	58.311	59.334	38.305	37.9832	22.8104	22.0874	13.1158	12.0236	7.79313	6.29093
91.64	83.1697	82.5293	58.324	59.334	38.3014	37.9832	22.8057	22.0874	13.1012	12.0236	7.78828	6.29093
92.64	83.1952	82.5293	58.3485	59.334	38.3086	37.9832	22.7944	22.0874	13.0953	12.0236	7.78551	6.29093
93.64	83.2519	82.5293	58.3732	59.334	38.3082	37.9832	22.7889	22.0874	13.0995	12.0236	7.79327	6.29093
94.64	83.285	82.5293	58.4013	59.334	38.3157	37.9832	22.789	22.0874	13.0972	12.0236	7.80893	6.29093
95.64	83.3019	82.5293	58.4152	59.334	38.2963	37.9832	22.7959	22.0874	13.0981	12.0236	7.8029	6.29093
96.64	83.327	82.5293	58.4339	59.334	38.304	37.9832	22.7975	22.0874	13.0938	12.0236	7.7989	6.29093
97.64	83.3596	82.5293	58.4634	59.334	38.32	37.9832	22.8199	22.0874	13.0957	12.0236	7.80275	6.29093
98.64	83.3819	82.5293	58.4841	59.334	38.343	37.9832	22.8315	22.0874	13.1019	12.0236	7.79905	6.29093
99.64	83.417	82.5293	58.5126	59.334	38.3666	37.9832	22.8499	22.0874	13.1155	12.0236	7.81193	6.29093
100.64	83.4672	82.5293	58.5551	59.334	38.3942	37.9832	22.8627	22.0874	13.1378	12.0236	7.8246	6.29093
101.64	83.5174	82.5293	58.5982	59.334	38.4113	37.9832	22.8807	22.0874	13.1605	12.0236	7.82994	6.29093
102.64	83.5629	82.5293	58.6278	59.334	38.4317	37.9832	22.8725	22.0874	13.1711	12.0236	7.83827	6.29093
103.64	83.5996	82.5293	58.6616	59.334	38.4455	37.9832	22.8808	22.0874	13.1741	12.0236	7.86131	6.29093
104.64	83.6263	82.5293	58.7002	59.334	38.4523	37.9832	22.8857	22.0874	13.1635	12.0236	7.86185	6.29093
105.64	83.6539	82.5293	58.721	59.334	38.4627	37.9832	22.8725	22.0874	13.1432	12.0236	7.84167	6.29093
106.64	83.6866	82.5293	58.7505	59.334	38.4717	37.9832	22.8803	22.0874	13.1319	12.0236	7.8404	6.29093
107.64	83.6942	82.5293	58.7807	59.334	38.5103	37.9832	22.8839	22.0874	13.1245	12.0236	7.83104	6.29093
108.64	83.7214	82.5293	58.8008	59.334	38.5209	37.9832	22.8807	22.0874	13.12	12.0236	7.81815	6.29093
109.64	83.766	82.5293	58.8216	59.334	38.5483	37.9832	22.8772	22.0874	13.1346	12.0236	7.81196	6.29093
110.64	83.8072	82.5293	58.8736	59.334	38.5633	37.9832	22.8906	22.0874	13.1456	12.0236	7.82291	6.29093
111.64	83.8557	82.5293	58.9099	59.334	38.5812	37.9832	22.8986	22.0874	13.1608	12.0236	7.83811	6.29093
112.64	83.8923	82.5293	58.9176	59.334	38.5768	37.9832	22.8952	22.0874	13.1622	12.0236	7.82975	6.29093
113.64	83.8904	82.5293	58.9435	59.334	38.5625	37.9832	22.8939	22.0874	13.1639	12.0236	7.82007	6.29093
114.64	83.8791	82.5293	58.9595	59.334	38.5606	37.9832	22.8671	22.0874	13.1413	12.0236	7.79838	6.29093
115.64	83.8556	82.5293	58.9526	59.334	38.5525	37.9832	22.8724	22.0874	13.1402	12.0236	7.77016	6.29093
116.64	83.903	82.5293	58.9269	59.334	38.5346	37.9832	22.8202	22.0874	13.1224	12.0236	7.75061	6.29093
117.64	84.0489	82.5293	58.9472	59.334	38.5404	37.9832	22.812	22.0874	13.1075	12.0236	7.72113	6.29093
118.64	84.1109	82.5293	59.0176	59.334	38.556	37.9832	22.8643	22.0874	13.1267	12.0236	7.69772	6.29093
119.64	85.0569	82.5293	58.7024	59.334	37.8344	37.9832	22.9152	22.0874	12.6336	12.0236	7.2998	6.29093
120.64	76.4906	74.4976	61.5297	59.334	38.9795	35.6117	23.6404	22.0874	14.6262	12.0236	9.32096	6.12613
121.64	56.1076	61.6311	44.8491	49.0864	27.7807	29.4612	19.5222	19.1959	9.77603	9.94704	5.52399	5.06808
122.64	43.7453	50.9868	36.4579	40.6087	22.9231	24.373	15.7438	15.8806	8.75763	8.22909	5.48169	4.19278
123.64	34.4014	42.1809	28.8105	33.5952	18.3897	20.1635	12.6862	13.1378	7.1753	6.80784	4.66623	3.46864
124.64	27.5897	34.8958	23.2869	27.7929	15.1694	16.6811	10.4753	10.8688	6.05358	5.63206	4.05427	2.86957
125.64	22.4827	28.8689	19.1669	22.9928	12.7373	13.8001	8.83157	8.99165	5.2089	4.65935	3.58695	2.37397
126.64	18.721	23.883	16.0987	19.0217	10.8394	11.4167	7.46423	7.4387	4.55436	3.85463	3.25779	1.96396
127.64	15.7228	19.7582	13.7626	15.7365	9.41683	9.4449	6.55384	6.15396	4.07692	3.1889	3.00347	1.62476
128.64	13.4184	16.3457	11.8877	13.0186	8.27566	7.81367	5.79095	5.09111	3.68337	2.63814	2.76258	1.34415
129.64	11.663	13.5227	10.4178	10.7702	7.39015	6.46417	5.14548	4.21183	3.34656	2.18251	2.59382	1.112
130.64	10.2769	11.1872	9.32344	8.91007	6.73406	5.34775	4.70587	3.4844	3.12294	1.80557	2.54051	0.919942
131.64	9.15368	9.25503	8.39602	7.37121	6.16035	4.42414	4.30884	2.88261	2.94602	1.49373	2.38454	0.761052
132.64	8.19748	7.65659	7.61261	6.09813	5.67675	3.66004	4.01822	2.38476	2.7585	1.23575	2.28325	0.629606
133.64	7.43366	6.33422	7.08728	5.04492	5.30851	3.02792	3.80033	1.97288	2.6416	1.02231	2.22433	0.520862
134.64	6.83228	5.24024	6.5667	4.17362	4.99007	2.50497	3.57689	1.63215	2.48007	0.845742	2.14881	0.430901
135.64	6.30623	4.3352	6.15003	3.45279	4.70976	2.07233	3.41345	1.35026	2.41244	0.699668	2.05853	0.356477
136.64	5.90798	3.58646	5.77039	2.85646	4.49226	1.71442	3.24017	1.11706	2.29817	0.578824	2.01301	0.294907
137.64	5.54071	2.96705	5.52312	2.36312	4.27917	1.41832	3.13783	0.924122	2.21204	0.478851	1.96594	0.243972
138.64	5.28922	2.45461	5.3057	1.95499	4.13425	1.17336	3.0554	0.76451	2.12602	0.396146	1.92883	0.201834
139.64	5.03182	2.03067	5.10491	1.61734	4.03167	0.970705	2.91509	0.632467	2.06971	0.327725	1.90213	0.166974
140.64	4.78068	1.67996	4.89862	1.33801	3.90644	0.803048	2.83493	0.523229	1.98951	0.271121	1.80888	0.138135
141.64	4.63291	1.38981	4.77217	1.10692	3.81175	0.664348	2.79204	0.432859	1.94893	0.224294	1.81541	0.114276
142.64	4.45726	1.14978	4.64705	0.915738	3.7482	0.549604	2.7565	0.358097	1.96168	0.185555	1.82182	0.094539
143.64	4.30507	0.95119	4.52283	0.757575	3.63078	0.454678	2.70697	0.296247	1.93417	0.153506	1.78956	0.0782106
144.64	4.14667	0.786904	4.39601	0.626729	3.54202	0.376148	2.65853	0.245081	1.90085	0.126993	1.72662	0.0647023
145.64	4.06462	0.650992	4.31117	0.518482	3.50215	0.311181	2.62251	0.202751	1.89173	0.105059	1.71758	0.0535271
146.64	3.95649	0.538555	4.23914	0.428932	3.44726	0.257435	2.57673	0.167733	1.86591	0.0869138	1.71504	0.0442821
147.64	3.86421	0.445538	4.17251	0.354848	3.36039	0.212971	2.53384	0.138762	1.82136	0.0719023	1.71713	0.0366338
148.64	3.7779	0.368586	4.09601	0.29356	3.27167	0.176188	2.5097	0.114796	1.79767	0.0594836	1.70032	0.0303066
149.64	3.6936	0.304925	4.02672	0.242857	3.21999	0.145757	2.48696	0.0949686	1.75379	0.0492098	1.68707	0.0250721
150.64	3.61789	0.252259	3.97977	0.200912	3.20065	0.120582	2.48821	0.0785659	1.75133	0.0407104	1.66883	0.0207417
151.64	3.54797	0.20869	3.93906	0.166211	3.18124	0.0997558	2.47211	0.0649963	1.73044	0.0336791	1.64918	0.0171593
152.64	3.50259	0.172646	3.87476	0.137503	3.16484	0.0825263	2.43305	0.0537703	1.72255	0.0278621	1.6284	0.0141956
153.64	3.45663	0.142827	3.84845	0.113754	3.14085	0.0682726	2.41977	0.0444833	1.71855	0.0230499	1.6162	0.0117438
154.64	3.41988	0.118158	3.80856	0.094107	3.1205	0.0564808	2.41008	0.0368003	1.72637	0.0190688	1.62566	0.00971543
155.64	3.36679	0.0977503	3.76009	0.0778532	3.09761	0.0467256	2.38571	0.0304443	1.72734	0.0157753	1.63507	0.00803741
156.64	3.29999	0.0808672	3.73049	0.0644066	3.06566	0.0386553	2.3561	0.025186	1.70702	0.0130506	1.64569	0.00664922
157.64	3.27838	0.0669001	3.69663	0.0532825	3.03949	0.0319789	2.34446	0.020836	1.69682	0.0107966	1.62533	0.00550079
158.64	3.21969	0.0553453	3.6393	0.0440797	2.98554	0.0264556	2.30563	0.0172373	1.65294	0.00893181	1.59981	0.00455071
159.64	3.16374	0.0457863	3.58298	0.0364664	2.97835	0.0218863	2.27446	0.0142601	1.63043	0.00738914	1.57409	0.00376472
160.64	3.11549	0.0378782	3.54616	0.0301681	2.97367	0.0181062	2.25149	0.0117971	1.64272	0.00611291	1.56154	0.00311449
161.64	3.09913	0.031336	3.51798	0.0249575	2.95073	0.0149789	2.23064	0.00975957	1.62804	0.00505711	1.55382	0.00257657
162.64	3.08891	0.0259238	3.47906	0.0206469	2.92664	0.0123918	2.23001	0.00807393	1.62341	0.00418366	1.55231	0.00213155
163.64	3.0575	0.0214463	3.4468	0.0170809	2.89022	0.0102515	2.23852	0.00667943	1.61926	0.00346107	1.54817	0.0017634
164.64	3.0143	0.0177422	3.40985	0.0141307	2.87547	0.00848093	2.23188	0.00552578	1.60544	0.00286329	1.5327	0.00145883
165.64	2.96697	0.0146778	3.39663	0.0116901	2.86011	0.00701613	2.22181	0.00457139	1.58346	0.00236875	1.52018	0.00120686
166.64	2.94872	0.0121427	3.35433	0.00967103	2.84843	0.00580433	2.18142	0.00378183	1.57838	0.00195963	1.51712	0.000998419
167.64	2.90926	0.0100454	3.31887	0.00800068	2.83854	0.00480182	2.1761	0.00312864	1.58262	0.00162117	1.51972	0.000825975
168.64	2.86874	0.00831043	3.29907	0.00661883	2.80112	0.00397247	2.17797	0.00258828	1.5539	0.00134116	1.50108	0.000683316
169.64	2.84587	0.00687508	3.26109	0.00547565	2.7748	0.00328635	2.16977	0.00214124	1.55673	0.00110952	1.49196	0.000565296
170.64	2.82415	0.00568764	3.25665	0.00452991	2.76328	0.00271875	2.17954	0.00177141	1.55505	0.000917889	1.48434	0.00046766
171.64	2.79141	0.00470529	3.25508	0.00374752	2.75671	0.00224917	2.17923	0.00146546	1.55005	0.000759355	1.48559	0.000386887
172.64	2.75876	0.00389261	3.24266	0.00310026	2.74296	0.0018607	2.17993	0.00121235	1.54716	0.000628201	1.49246	0.000320065
173.64	2.72649	0.00322029	3.21687	0.00256479	2.72558	0.00153933	2.16001	0.00100296	1.52915	0.0005197	1.49586	0.000264784
174.64	2.7328	0.00266409	3.19767	0.00212181	2.72237	0.00127346	2.13853	0.000829728	1.53242	0.000429939	1.49843	0.000219052
175.64	2.70065	0.00220396	3.186	0.00175534	2.72581	0.00105351	2.13009	0.00068642	1.53714	0.000355682	1.5051	0.000181218
176.64	2.67868	0.0018233	3.16078	0.00145216	2.70332	0.000871554	2.09509	0.000567864	1.5254	0.00029425	1.4918	0.000149918
177.64	2.64672	0.00150838	3.13086	0.00120135	2.69004	0.000721022	2.08149	0.000469784	1.51345	0.000243428	1.46149	0.000124025
178.64	2.62819	0.00124786	3.11947	0.000993856	2.68929	0.000596489	2.07329	0.000388645	1.5123	0.000201384	1.44089	0.000102604
179.64	2.61041	0.00103233	3.10319	0.000822201	2.66292	0.000493466	2.06673	0.000321519	1.50198	0.000166601	1.42143	8.48824e-05
180.64	2.59914	0.000854032	3.07188	0.000680193	2.64268	0.000408236	2.07516	0.000265988	1.50485	0.000137827	1.41422	7.02218e-05
181.64	2.5761	0.000706527	3.0511	0.000562712	2.64062	0.000337727	2.06665	0.000220047	1.49614	0.000114022	1.40395	5.80933e-05
182.64	2.56227	0.000584498	3.03563	0.000465522	2.64315	0.000279396	2.05064	0.000182041	1.48673	9.43281e-05	1.41055	4.80597e-05
183.64	2.51946	0.000483545	3.01907	0.000385119	2.62362	0.000231139	2.0361	0.0001506	1.47993	7.80361e-05	1.40532	3.97589e-05
184.64	2.48532	0.000400029	2.97469	0.000318602	2.60897	0.000191218	2.00806	0.000124589	1.44599	6.45579e-05	1.38114	3.28919e-05
185.64	2.44757	0.000330937	2.96009	0.000263574	2.5687	0.000158191	1.99477	0.00010307	1.43351	5.34077e-05	1.38671	2.72109e-05
186.64	2.42034	0.000273779	2.93038	0.000218051	2.55081	0.000130869	1.97368	8.52681e-05	1.42401	4.41833e-05	1.36924	2.25111e-05
187.64	2.39423	0.000226493	2.90563	0.00018039	2.51757	0.000108266	1.95102	7.05409e-05	1.43185	3.65521e-05	1.36543	1.86231e-05
188.64	2.38195	0.000187373	2.90322	0.000149233	2.5012	8.95664e-05	1.92798	5.83573e-05	1.43734	3.02389e-05	1.35616	1.54066e-05
189.64	2.35205	0.000155011	2.91741	0.000123458	2.49468	7.40968e-05	1.93313	4.8278e-05	1.44108	2.50162e-05	1.37342	1.27456e-05
190.64	2.34726	0.000128238	2.89251	0.000102135	2.493	6.1299e-05	1.92829	3.99396e-05	1.42702	2.06955e-05	1.37038	1.05442e-05
191.64	2.34002	0.000106089	2.88178	8.44946e-05	2.51077	5.07116e-05	1.95266	3.30414e-05	1.44264	1.7121e-05	1.38763	8.72306e-06
192.64	2.32273	8.77658e-05	2.86775	6.99009e-05	2.50503	4.19529e-05	1.97055	2.73346e-05	1.43257	1.41639e-05	1.39428	7.21644e-06
193.64	2.3044	7.26071e-05	2.84045	5.78279e-05	2.48968	3.47069e-05	1.96392	2.26134e-05	1.42147	1.17176e-05	1.37811	5.97004e-06
194.64	2.28241	6.00667e-05	2.8265	4.784e-05	2.48003	2.87125e-05	1.95259	1.87077e-05	1.42078	9.69376e-06	1.35788	4.93891e-06
195.64	2.27979	4.96921e-05	2.82092	3.95773e-05	2.45289	2.37533e-05	1.94603	1.54766e-05	1.41444	8.01948e-06	1.33983	4.08588e-06
196.64	2.25397	4.11095e-05	2.82369	3.27416e-05	2.42816	1.96507e-05	1.93142	1.28035e-05	1.41812	6.63438e-06	1.3353	3.38018e-06
197.64	2.23377	3.40092e-05	2.80826	2.70866e-05	2.41695	1.62567e-05	1.92454	1.05921e-05	1.41881	5.48851e-06	1.33795	2.79637e-06
198.64	2.20936	2.81352e-05	2.77689	2.24083e-05	2.40355	1.34489e-05	1.92321	8.76269e-06	1.4157	4.54056e-06	1.30702	2.31339e-06
199.64	2.18953	2.32758e-05	2.73266	1.8538e-05	2.38164	1.11261e-05	1.91314	7.24923e-06	1.39161	3.75633e-06	1.29911	1.91383e-06
200.64	2.16596	1.92557e-05	2.71748	1.53362e-05	2.36812	9.20441e-06	1.91165	5.99717e-06	1.38858	3.10755e-06	1.29475	1.58328e-06
201.64	2.15499	1.59299e-05	2.70236	1.26874e-05	2.35492	7.61465e-06	1.91345	4.96136e-06	1.38605	2.57082e-06	1.28182	1.30982e-06
202.64	2.14432	1.31785e-05	2.68874	1.0496e-05	2.34761	6.29947e-06	1.91322	4.10445e-06	1.37097	2.1268e-06	1.25885	1.08359e-06
203.64	2.12382	1.09024e-05	2.67767	8.6832e-06	2.31636	5.21145e-06	1.89048	3.39554e-06	1.35202	1.75946e-06	1.2289	8.96437e-07
204.64	2.11516	9.01936e-06	2.67188	7.18346e-06	2.30398	4.31134e-06	1.87095	2.80907e-06	1.34575	1.45557e-06	1.22075	7.41607e-07
205.64	2.11143	7.46157e-06	2.66264	5.94276e-06	2.29117	3.5667e-06	1.86595	2.3239e-06	1.35546	1.20417e-06	1.22193	6.13519e-07
206.64	2.11827	6.17283e-06	2.66213	4.91634e-06	2.31898	2.95067e-06	1.86931	1.92252e-06	1.3505	9.96192e-07	1.23722	5.07554e-07
207.64	2.1151	5.10668e-06	2.66045	4.06721e-06	2.32066	2.44104e-06	1.89368	1.59047e-06	1.36533	8.24133e-07	1.27783	4.19891e-07
208.64	2.09608	4.22467e-06	2.65775	3.36473e-06	2.30335	2.01943e-06	1.90525	1.31577e-06	1.36894	6.81791e-07	1.27831	3.47369e-07
209.64	2.08961	3.495e-06	2.64477	2.78359e-06	2.29452	1.67064e-06	1.88696	1.08851e-06	1.36622	5.64034e-07	1.26426	2.87372e-07
210.64	2.08143	2.89135e-06	2.65006	2.30282e-06	2.30745	1.3821e-06	1.89368	9.0051e-07	1.38393	4.66616e-07	1.27682	2.37738e-07
211.64	2.06007	2.39197e-06	2.64994	1.90508e-06	2.29925	1.14338e-06	1.88415	7.44977e-07	1.39062	3.86024e-07	1.27038	1.96677e-07
212.64	2.05344	1.97884e-06	2.63828	1.57604e-06	2.28535	9.45903e-07	1.88033	6.16307e-07	1.38806	3.19351e-07	1.26461	1.62708e-07
213.64	2.04844	1.63706e-06	2.62102	1.30383e-06	2.28613	7.8253e-07	1.87251	5.0986e-07	1.38196	2.64194e-07	1.24555	1.34605e-07
214.64	2.05087	1.35431e-06	2.61704	1.07864e-06	2.27976	6.47374e-07	1.87572	4.21799e-07	1.38615	2.18563e-07	1.25262	1.11357e-07
215.64	2.04401	1.1204e-06	2.60936	8.9234e-07	2.2564	5.35561e-07	1.88227	3.48947e-07	1.38843	1.80814e-07	1.26342	9.21235e-08
216.64	2.00624	9.26887e-07	2.59087	7.38218e-07	2.23726	4.43061e-07	1.86462	2.88678e-07	1.37957	1.49584e-07	1.25612	7.62122e-08
217.64	1.99977	7.66798e-07	2.57476	6.10715e-07	2.21914	3.66537e-07	1.86243	2.38819e-07	1.38076	1.23748e-07	1.25262	6.30491e-08
218.64	1.99297	6.34359e-07	2.56359	5.05235e-07	2.21335	3.0323e-07	1.85454	1.97571e-07	1.37865	1.02375e-07	1.24692	5.21595e-08
219.64	1.98501	5.24795e-07	2.54383	4.17972e-07	2.21132	2.50857e-07	1.84477	1.63447e-07	1.36318	8.46931e-08	1.24911	4.31507e-08
220.64	1.98057	4.34154e-07	2.52233	3.45781e-07	2.21039	2.0753e-07	1.84478	1.35217e-07	1.36921	7.00652e-08	1.24068	3.56978e-08
221.64	1.98921	3.59168e-07	2.50869	2.86059e-07	2.20543	1.71686e-07	1.84166	1.11863e-07	1.36937	5.79637e-08	1.24585	2.95322e-08
222.64	1.96899	2.97134e-07	2.50086	2.36652e-07	2.20781	1.42033e-07	1.84478	9.25421e-08	1.36325	4.79524e-08	1.24106	2.44315e-08
223.64	1.94159	2.45814e-07	2.4778	1.95778e-07	2.193	1.17501e-07	1.84283	7.65585e-08	1.35691	3.96702e-08	1.22526	2.02118e-08
224.64	1.91171	2.03358e-07	2.45846	1.61964e-07	2.17417	9.7207e-08	1.83501	6.33356e-08	1.34929	3.28185e-08	1.20788	1.67209e-08
225.64	1.89704	1.68234e-07	2.45172	1.3399e-07	2.16444	8.04177e-08	1.81665	5.23965e-08	1.33583	2.71502e-08	1.18301	1.38329e-08
226.64	1.88565	1.39178e-07	2.46225	1.10848e-07	2.15229	6.65282e-08	1.81704	4.33467e-08	1.34518	2.24609e-08	1.18228	1.14437e-08
227.64	1.88546	1.15139e-07	2.45064	9.17025e-08	2.15531	5.50377e-08	1.8154	3.586e-08	1.34042	1.85815e-08	1.16776	9.46719e-09
228.64	1.88345	9.52528e-08	2.44196	7.5864e-08	2.14159	4.55318e-08	1.80532	2.96664e-08	1.32274	1.53722e-08	1.15055	7.83205e-09
229.64	1.91579	7.8801e-08	2.45282	6.2761e-08	2.14882	3.76677e-08	1.79361	2.45425e-08	1.32763	1.27172e-08	1.16356	6.47932e-09
230.64	1.90626	6.51908e-08	2.4507	5.19211e-08	2.15281	3.11618e-08	1.8104	2.03036e-08	1.34068	1.05207e-08	1.18481	5.36024e-09
231.64	1.8961	5.39312e-08	2.44945	4.29535e-08	2.14823	2.57797e-08	1.80188	1.67968e-08	1.34962	8.7036e-09	1.19524	4.43443e-09
232.64	1.88284	4.46164e-08	2.43506	3.55347e-08	2.1523	2.13271e-08	1.78579	1.38957e-08	1.34737	7.20034e-09	1.20252	3.66853e-09
233.64	1.86445	3.69104e-08	2.42134	2.93972e-08	2.14742	1.76435e-08	1.78298	1.14957e-08	1.34863	5.95672e-09	1.20722	3.03492e-09
234.64	1.84602	3.05354e-08	2.40813	2.43199e-08	2.13484	1.45962e-08	1.76274	9.51021e-09	1.34888	4.9279e-09	1.20746	2.51074e-09
235.64	1.82024	2.52614e-08	2.38789	2.01194e-08	2.14179	1.20752e-08	1.76438	7.86764e-09	1.33599	4.07677e-09	1.18825	2.07709e-09
236.64	1.80103	2.08983e-08	2.36179	1.66444e-08	2.13261	9.9896e-09	1.73696	6.50877e-09	1.32946	3.37264e-09	1.17633	1.71834e-09
237.64	1.7911	1.72888e-08	2.35211	1.37697e-08	2.12128	8.26423e-09	1.70571	5.38459e-09	1.3129	2.79013e-09	1.17969	1.42155e-09
238.64	1.78978	1.43028e-08	2.32539	1.13914e-08	2.09499	6.83686e-09	1.71235	4.45458e-09	1.29333	2.30823e-09	1.18161	1.17603e-09
239.64	1.81798	1.18324e-08	2.32679	9.42393e-09	2.09452	5.65602e-09	1.719	3.6852e-09	1.29778	1.90956e-09	1.18606	9.72909e-10
240.64	1.86708	9.78878e-09	2.32355	7.79626e-09	2.10918	4.67913e-09	1.7272	3.04871e-09	1.27974	1.57974e-09	1.19896	8.04871e-10
							1.73196	2.52214e-09

## Sheet: biotin-C3d ISG65ΔL2
Cycle: 12 ISG65dL2 10000 nM_X	Cycle: 12 ISG65dL2 10000 nM_Y	Fitted Cycle: 12 ISG65dL2 1000_Y	Cycle: 13 ISG65dL2 5000 nM_Y	Fitted Cycle: 13 ISG65dL2 5000_Y	Cycle: 14 ISG65dL2 2500 nM_Y	Fitted Cycle: 14 ISG65dL2 2500_Y	Cycle: 15 ISG65dL2 1250 nM_Y	Fitted Cycle: 15 ISG65dL2 1250_Y	Cycle: 16 ISG65dL2 625 nM_Y	Fitted Cycle: 16 ISG65dL2 625 _Y	Cycle: 17 ISG65dL2 312.5 nM_Y	Fitted Cycle: 17 ISG65dL2 312._Y
-59.28	0.116455	0	0.136719	0	0.164307	0	0.162476	0	0.102661	0	0.143799	0
-58.28	0.114893	0	0.144141	0	0.158447	0	0.15271	0	0.0991455	0	0.150049	0
-57.28	0.112549	0	0.144531	0	0.162354	0	0.140991	0	0.0889891	0	0.13208	0
-56.28	0.112549	0	0.154297	0	0.170166	0	0.140991	0	0.0889891	0	0.122314	0
-55.28	0.114502	0	0.152344	0	0.165283	0	0.15271	0	0.0958252	0	0.119385	0
-54.28	0.124267	0	0.162109	0	0.162354	0	0.140991	0	0.10852	0	0.13208	0
-53.28	0.133642	0	0.176172	0	0.187744	0	0.150757	0	0.10227	0	0.145361	0
-52.28	0.145752	0	0.185547	0	0.193604	0	0.172241	0	0.110474	0	0.16333	0
-51.28	0.126221	0	0.183594	0	0.188721	0	0.182007	0	0.107544	0	0.158447	0
-50.28	0.108643	0	0.181641	0	0.164307	0	0.182007	0	0.106568	0	0.155518	0
-49.28	0.0949706	0	0.175781	0	0.142822	0	0.15271	0	0.100708	0	0.141846	0
-48.28	0.0949706	0	0.175781	0	0.152588	0	0.15271	0	0.110474	0	0.151611	0
-47.28	0.0852051	0	0.164063	0	0.157471	0	0.15271	0	0.11731	0	0.150635	0
-46.28	0.0754395	0	0.152344	0	0.147705	0	0.15271	0	0.11731	0	0.140869	0
-45.28	0.0867674	0	0.144922	0	0.143799	0	0.133179	0	0.111059	0	0.144385	0
-44.28	0.0871581	0	0.146484	0	0.154541	0	0.144897	0	0.100708	0	0.155517	0
-43.28	0.093408	0	0.138281	0	0.189697	0	0.144897	0	0.112817	0	0.146142	0
-42.28	0.104736	0	0.130859	0	0.186768	0	0.172241	0	0.11731	0	0.138916	0
-41.28	0.104346	0	0.123438	0	0.173096	0	0.15271	0	0.111059	0	0.132666	0
-40.28	0.114502	0	0.125	0	0.193604	0	0.162476	0	0.102661	0	0.143799	0
-39.28	0.202392	0	0.126953	0	0.183838	0	0.162476	0	0.112427	0	0.153564	0
-38.28	0.0928954	0	0.228516	0	0.293213	0	0.15271	0	0.100708	0	0.153564	0
-37.28	0.0832523	0	0.153076	0	0.208008	0	0.269897	0	0.204224	0	0.249268	0
-36.28	0.0950442	0	0.146655	0	0.196106	0	0.155884	0	0.104627	0	0.11305	0
-35.28	0.0516119	0	0.140161	0	0.177734	0	0.15625	0	0.114234	0	0.110084	0
-34.28	-0.091576	0	0.0599598	0	0.0770264	0	0.0889893	0	0.087135	0	0.115333	0
-33.28	-0.201122	0	-0.0779303	0	-0.0459595	0	-0.0551758	0	-0.0356562	0	0.046253	0
-32.28	-0.228223	0	-0.145678	0	-0.0771484	0	-0.152954	0	-0.112256	0	-0.0478033	0
-31.28	-0.193189	0	-0.137744	0	-0.0699463	0	-0.140259	0	-0.0930914	0	-0.0468267	0
-30.28	-0.17522	0	-0.117748	0	-0.0597534	0	-0.131714	0	-0.0797003	0	-0.0480841	0
-29.28	-0.16272	0	-0.106079	0	-0.0445557	0	-0.103638	0	-0.0657963	0	-0.037598	0
-28.28	-0.154981	0	-0.0958737	0	-0.0518799	0	-0.10437	0	-0.0611087	0	-0.047681	0
-27.28	-0.14541	0	-0.0971434	0	-0.0605469	0	-0.103882	0	-0.0714357	0	-0.0647219	0
-26.28	-0.121485	0	-0.0981198	0	-0.0584106	0	-0.0974121	0	-0.0732059	0	-0.0515995	0
-25.28	-0.106885	0	-0.0817136	0	-0.0542603	0	-0.0777588	0	-0.0673953	0	-0.0360232	0
-24.28	-0.122559	0	-0.092285	0	-0.0386963	0	-0.0797119	0	-0.069214	0	-0.0378419	0
-23.28	-0.113184	0	-0.0937253	0	-0.0228271	0	-0.0877686	0	-0.0594729	0	-0.0248049	0
-22.28	-0.123242	0	-0.0918455	0	-0.0296021	0	-0.0793457	0	-0.0462771	0	-0.0324832	0
-21.28	-0.128003	0	-0.0820799	0	-0.041748	0	-0.0582275	0	-0.0373048	0	-0.0430422	0
-20.28	-0.141748	0	-0.0927487	0	-0.0505981	0	-0.071167	0	-0.0581912	0	-0.056116	0
-19.28	-0.128931	0	-0.0926264	0	-0.0514526	0	-0.0825195	0	-0.0559942	0	-0.0535528	0
-18.28	-0.117554	0	-0.0632318	0	-0.0404053	0	-0.0531006	0	-0.0461432	0	-0.0323492	0
-17.28	-0.098853	0	-0.026147	0	-0.0368652	0	-0.043457	0	-0.0278081	0	-0.0176763	0
-16.28	-0.0773932	0	-0.0130609	0	-0.0229492	0	-0.041748	0	-0.0234381	0	0.0162348	0
-15.28	-0.0605962	0	0.0114018	0	-0.0194702	0	-0.0266113	0	-0.00853318	0	0.0329707	0
-14.28	-0.040308	0	0.0283451	0	-0.00720215	0	-0.0090332	0	0.00790976	0	0.039648	0
-13.28	-0.0276614	0	0.0305911	0	-0.000915527	0	-0.00585938	0	0.0154905	0	0.0292844	0
-12.28	-0.00378466	0	0.0148931	0	-0.00231934	0	0.000854492	0	0.00366163	0	0.0334468	0
-11.28	0.0113279	0	0.017969	0	0.0065918	0	0.0218506	0	0.0241452	0	0.0199949	0
-10.28	0.0177243	0	0.00974154	0	0.0098877	0	0.0238037	0	0.0196774	0	0.00222135	0
-9.28003	0.0204343	0	-0.00163546	0	0.0268555	0	0.0202637	0	0.0148191	0	-0.00581083	0
-8.28003	0.0210446	0	-0.00200161	0	0.0311279	0	0.0233154	0	0.0162838	0	-0.00117221	0
-7.28003	0.0187739	0	-0.0108393	0	0.0263672	0	0.000732422	0	0.000707507	0	-0.00893605	0
-6.28003	-0.00405301	0	0.00539578	0	0.0384521	0	-0.00744629	0	0.00498019	0	0.00559054	0
-5.28003	-0.0138185	0	-0.00473615	0	0.0227661	0	-0.0252686	0	0.00272199	0	-0.00667743	0
-4.28003	-0.0360604	0	-0.0198478	0	0.0172119	0	-0.043335	0	-0.0089608	0	-0.0068856	0
-3.28003	-0.0141129	0	-0.0463119	0	0.0391235	0	-0.0693359	0	-0.00599527	0	-0.0105119	0
-2.28003	0.0151851	0	-0.0509517	0	0.0374756	0	0.000854492	0	0.00847125	0	-0.0105717	0
-1.28003	0.119486	0	0.160055	0	0.195129	0	0.100464	0	0.149576	0	0.173136	0
-0.280029	-0.72332	0	0.551201	0	1.16577	0	0.139771	0	0.785347	0	0.826851	0
0.719971	17.1775	33.2998	-0.953474	3.16825	0.0494995	5.37972	-0.388428	0	-1.52217	0.724509	-1.35018	0.362582
1.71997	62.2131	65.4172	24.3655	25.6193	17.4857	16.2807	4.20837	5.65413	4.15356	3.67924	2.96496	1.84859
2.71997	85.5894	86.344	44.1648	42.3187	27.8707	24.9438	11.3878	10.7438	6.8702	6.14691	3.83138	3.09996
3.71997	98.8354	99.9794	57.4442	54.7398	35.5977	31.8284	16.8954	14.9248	9.64286	8.20781	5.27018	4.15373
4.71997	106.689	108.864	65.6863	63.9787	40.9514	37.2997	20.8287	18.3593	11.6052	9.92898	6.26594	5.04111
5.71997	111.602	114.652	71.1374	70.8507	44.6362	41.6478	23.8776	21.1805	13.182	11.3664	7.1383	5.78837
6.71997	114.858	118.424	74.7847	75.962	47.3174	45.1033	26.0553	23.498	14.3693	12.5669	7.80346	6.41764
7.71997	117.25	120.882	77.4373	79.7639	49.324	47.8494	27.7318	25.4017	15.3297	13.5696	8.38467	6.94755
8.71997	118.996	122.483	79.39	82.5917	50.8947	50.0317	29.0623	26.9656	16.1819	14.4069	8.87631	7.39378
9.71997	120.282	123.526	80.8883	84.695	52.0923	51.766	30.1764	28.2501	16.838	15.1062	9.26416	7.76955
10.72	121.187	124.206	81.9893	86.2594	53.0302	53.1442	31.0083	29.3054	17.3388	15.6902	9.62481	8.08598
11.72	122.013	124.649	82.8024	87.4231	53.7697	54.2396	31.6752	30.1722	17.8108	16.178	9.96596	8.35245
12.72	122.664	124.937	83.5841	88.2886	54.3339	55.11	32.2522	30.8842	18.196	16.5853	10.2455	8.57685
13.72	123.127	125.126	84.0928	88.9324	54.7674	55.8018	32.6097	31.4692	18.4731	16.9256	10.4065	8.76581
14.72	123.519	125.248	84.5282	89.4112	55.1542	56.3515	32.95	31.9496	18.7293	17.2097	10.6066	8.92494
15.72	123.945	125.328	84.897	89.7674	55.4611	56.7884	33.2651	32.3443	18.9781	17.447	10.782	9.05894
16.72	124.242	125.38	85.1875	90.0323	55.7695	57.1356	33.5382	32.6685	19.1626	17.6452	10.9522	9.17178
17.72	124.485	125.414	85.4572	90.2293	55.9991	57.4115	33.7817	32.9349	19.3334	17.8107	11.0904	9.2668
18.72	124.667	125.436	85.6984	90.3759	56.1306	57.6307	33.9633	33.1536	19.4286	17.9489	11.2134	9.34681
19.72	124.891	125.45	85.883	90.4849	56.2675	57.805	34.0546	33.3334	19.5274	18.0643	11.3208	9.4142
20.72	125.079	125.46	86.0364	90.566	56.4384	57.9435	34.2557	33.481	19.6378	18.1607	11.3782	9.47094
21.72	125.181	125.466	86.1972	90.6263	56.6107	58.0536	34.35	33.6023	19.7136	18.2413	11.4442	9.51872
22.72	125.362	125.47	86.3452	90.6712	56.7228	58.141	34.4288	33.7019	19.8112	18.3085	11.4997	9.55895
23.72	125.547	125.472	86.4576	90.7045	56.8157	58.2105	34.5266	33.7837	19.8871	18.3647	11.5803	9.59284
24.72	125.615	125.474	86.6021	90.7293	56.9803	58.2658	34.6689	33.8509	19.9707	18.4116	11.6083	9.62137
25.72	125.745	125.475	86.7217	90.7478	57.0551	58.3096	34.7147	33.9061	20.063	18.4507	11.6303	9.6454
26.72	125.82	125.476	86.8123	90.7615	57.0884	58.3445	34.7831	33.9515	20.0997	18.4835	11.6783	9.66563
27.72	125.927	125.476	86.9066	90.7717	57.159	58.3723	34.8601	33.9887	20.1101	18.5108	11.7135	9.68267
28.72	125.995	125.477	87.0149	90.7793	57.2581	58.3943	34.9272	34.0193	20.1737	18.5336	11.7791	9.69701
29.72	126.095	125.477	87.0935	90.785	57.3387	58.4118	34.9794	34.0445	20.2272	18.5526	11.8271	9.7091
30.72	126.168	125.477	87.1454	90.7892	57.4164	58.4257	35.0609	34.0651	20.2542	18.5686	11.8724	9.71927
31.72	126.263	125.477	87.1914	90.7923	57.4518	58.4368	35.1216	34.0821	20.2645	18.5818	11.9122	9.72784
32.72	126.267	125.477	87.1963	90.7946	57.4893	58.4455	35.1511	34.096	20.2895	18.5929	11.9303	9.73505
33.72	126.35	125.477	87.2568	90.7963	57.5374	58.4525	35.1953	34.1075	20.3493	18.6022	11.9624	9.74113
34.72	126.426	125.477	87.3194	90.7976	57.5862	58.4581	35.2355	34.1169	20.4033	18.61	11.9953	9.74624
35.72	126.464	125.477	87.3605	90.7986	57.6213	58.4625	35.2816	34.1246	20.437	18.6164	12.0243	9.75055
36.72	126.488	125.477	87.3994	90.7993	57.6625	58.466	35.2914	34.131	20.4684	18.6218	12.0424	9.75418
37.72	126.585	125.477	87.5075	90.7998	57.6872	58.4688	35.318	34.1362	20.4995	18.6263	12.0836	9.75724
38.72	126.641	125.477	87.6124	90.8002	57.7366	58.471	35.3535	34.1404	20.5486	18.6301	12.1322	9.75981
39.72	126.689	125.477	87.6302	90.8005	57.8014	58.4727	35.4122	34.144	20.5725	18.6332	12.1446	9.76197
40.72	126.734	125.477	87.7026	90.8007	57.8553	58.4741	35.483	34.1469	20.6052	18.6359	12.1728	9.7638
41.72	126.777	125.477	87.7982	90.8009	57.9044	58.4752	35.5137	34.1492	20.6222	18.6381	12.175	9.76533
42.72	126.814	125.477	87.8367	90.801	57.9484	58.4761	35.5316	34.1512	20.6277	18.6399	12.1985	9.76663
43.72	126.857	125.477	87.8781	90.8011	57.98	58.4768	35.5347	34.1528	20.6603	18.6414	12.2127	9.76772
44.72	126.912	125.477	87.9321	90.8012	58.0297	58.4774	35.5726	34.1541	20.6937	18.6427	12.2364	9.76864
45.72	126.967	125.477	88.0039	90.8012	58.0633	58.4778	35.6249	34.1552	20.7323	18.6438	12.2782	9.76941
46.72	127.016	125.477	88.0318	90.8012	58.0765	58.4782	35.6555	34.1561	20.7251	18.6447	12.3042	9.77006
47.72	127.045	125.477	88.0506	90.8013	58.0864	58.4785	35.6852	34.1568	20.7311	18.6454	12.3054	9.77061
48.72	127.116	125.477	88.0942	90.8013	58.1464	58.4787	35.7067	34.1574	20.7556	18.646	12.3264	9.77107
49.72	127.168	125.477	88.1523	90.8013	58.2102	58.4789	35.7394	34.1579	20.7677	18.6466	12.3271	9.77146
50.72	127.204	125.477	88.2018	90.8013	58.2737	58.479	35.7589	34.1583	20.8069	18.647	12.3578	9.77178
51.72	127.264	125.477	88.2624	90.8013	58.3318	58.4791	35.8176	34.1586	20.8285	18.6473	12.3795	9.77206
52.72	127.309	125.477	88.2999	90.8013	58.3676	58.4792	35.8422	34.1589	20.8564	18.6476	12.4077	9.77229
53.72	127.351	125.477	88.3388	90.8013	58.3682	58.4793	35.8713	34.1591	20.8653	18.6479	12.4264	9.77249
54.72	127.369	125.477	88.3745	90.8013	58.391	58.4793	35.8944	34.1593	20.861	18.6481	12.4397	9.77265
55.72	127.417	125.477	88.432	90.8013	58.4269	58.4794	35.9055	34.1594	20.8606	18.6483	12.4802	9.77279
56.72	127.454	125.477	88.4855	90.8013	58.4949	58.4794	35.9553	34.1596	20.8798	18.6484	12.4998	9.77291
57.72	127.5	125.477	88.5233	90.8013	58.5488	58.4794	35.9926	34.1597	20.8957	18.6486	12.5251	9.773
58.72	127.593	125.477	88.5447	90.8013	58.5937	58.4795	36.0073	34.1598	20.9209	18.6487	12.5409	9.77309
59.72	127.613	125.477	88.5961	90.8013	58.6132	58.4795	36.0446	34.1598	20.9625	18.6487	12.5626	9.77316
60.72	127.655	125.477	88.6426	90.8013	58.6435	58.4795	36.037	34.1599	20.9908	18.6488	12.5714	9.77321
61.72	127.679	125.477	88.6835	90.8014	58.6895	58.4795	36.0527	34.1599	21.0167	18.6489	12.5758	9.77326
62.72	127.717	125.477	88.6914	90.8014	58.7213	58.4795	36.0902	34.16	21.0389	18.6489	12.5882	9.77331
63.72	127.769	125.477	88.7226	90.8014	58.7711	58.4795	36.1332	34.16	21.0368	18.649	12.6288	9.77334
64.72	127.785	125.477	88.766	90.8014	58.7938	58.4795	36.182	34.16	21.042	18.649	12.6256	9.77337
65.72	127.806	125.477	88.8236	90.8014	58.8425	58.4795	36.1934	34.16	21.036	18.649	12.6327	9.77339
66.72	127.799	125.477	88.8618	90.8014	58.8653	58.4795	36.2101	34.1601	21.0551	18.6491	12.6359	9.77342
67.72	127.711	125.477	88.8326	90.8014	58.8118	58.4795	36.2	34.1601	21.0572	18.6491	12.6266	9.77343
68.72	127.65	125.477	88.7528	90.8014	58.728	58.4795	36.1378	34.1601	21.0088	18.6491	12.6058	9.77345
69.72	127.629	125.477	88.6647	90.8014	58.6635	58.4795	36.0758	34.1601	20.962	18.6491	12.5607	9.77346
70.72	127.638	125.477	88.597	90.8014	58.5948	58.4795	36.0613	34.1601	20.9517	18.6491	12.555	9.77347
71.72	127.637	125.477	88.5542	90.8014	58.5571	58.4795	36.0204	34.1601	20.9224	18.6491	12.5472	9.77348
72.72	127.629	125.477	88.5672	90.8014	58.5326	58.4795	35.9301	34.1601	20.8701	18.6491	12.5293	9.77349
73.72	127.671	125.477	88.5682	90.8014	58.4959	58.4795	35.8635	34.1601	20.8211	18.6491	12.4983	9.77349
74.72	127.706	125.477	88.5705	90.8014	58.472	58.4795	35.8407	34.1601	20.7837	18.6492	12.5114	9.7735
75.72	127.768	125.477	88.5784	90.8014	58.4566	58.4795	35.8208	34.1601	20.7584	18.6492	12.5484	9.7735
76.72	127.81	125.477	88.6067	90.8014	58.4656	58.4795	35.7788	34.1601	20.7479	18.6492	12.5703	9.77351
77.72	127.868	125.477	88.6368	90.8014	58.4503	58.4795	35.7617	34.1601	20.7278	18.6492	12.5745	9.77351
78.72	127.919	125.477	88.6574	90.8014	58.4316	58.4795	35.7493	34.1601	20.7082	18.6492	12.5466	9.77351
79.72	127.964	125.477	88.6894	90.8014	58.4232	58.4795	35.7539	34.1601	20.7093	18.6492	12.5201	9.77352
80.72	127.995	125.477	88.6942	90.8014	58.4075	58.4795	35.7117	34.1601	20.684	18.6492	12.495	9.77352
81.72	128.055	125.477	88.6874	90.8014	58.4059	58.4795	35.6788	34.1601	20.6444	18.6492	12.4848	9.77352
82.72	128.09	125.477	88.6941	90.8014	58.393	58.4795	35.656	34.1601	20.6234	18.6492	12.4867	9.77352
83.72	128.138	125.477	88.7216	90.8014	58.3964	58.4795	35.6449	34.1601	20.6029	18.6492	12.4773	9.77352
84.72	128.162	125.477	88.7461	90.8014	58.393	58.4795	35.6527	34.1601	20.5861	18.6492	12.4691	9.77352
85.72	128.178	125.477	88.7811	90.8014	58.3808	58.4795	35.646	34.1601	20.5622	18.6492	12.4546	9.77352
86.72	128.208	125.477	88.7993	90.8014	58.3751	58.4795	35.615	34.1601	20.5349	18.6492	12.4175	9.77352
87.72	128.242	125.477	88.806	90.8014	58.3816	58.4795	35.5844	34.1601	20.5101	18.6492	12.3927	9.77352
88.72	128.306	125.477	88.8283	90.8014	58.3655	58.4795	35.5664	34.1601	20.4698	18.6492	12.3625	9.77352
89.72	128.358	125.477	88.8482	90.8014	58.3793	58.4795	35.5336	34.1601	20.4543	18.6492	12.345	9.77353
90.72	128.418	125.477	88.8829	90.8014	58.3971	58.4795	35.53	34.1601	20.4404	18.6492	12.3425	9.77353
91.72	128.504	125.477	88.9149	90.8014	58.4126	58.4795	35.5269	34.1601	20.4404	18.6492	12.3425	9.77353
92.72	128.55	125.477	88.9447	90.8014	58.4395	58.4795	35.525	34.1601	20.4274	18.6492	12.3479	9.77353
93.72	128.584	125.477	88.9619	90.8014	58.4468	58.4795	35.5153	34.1601	20.4048	18.6492	12.3252	9.77353
94.72	128.624	125.477	88.9667	90.8014	58.446	58.4795	35.4989	34.1601	20.3857	18.6492	12.2963	9.77353
95.72	128.651	125.477	88.9856	90.8014	58.4413	58.4795	35.4796	34.1601	20.3558	18.6492	12.2758	9.77353
96.72	128.675	125.477	89.0046	90.8014	58.4338	58.4795	35.468	34.1601	20.347	18.6492	12.2463	9.77353
97.72	128.732	125.477	89.0295	90.8014	58.4385	58.4795	35.4711	34.1601	20.3502	18.6492	12.2507	9.77353
98.72	128.774	125.477	89.05	90.8014	58.4487	58.4795	35.4781	34.1601	20.3477	18.6492	12.2501	9.77353
99.72	128.842	125.477	89.0895	90.8014	58.4544	58.4795	35.4696	34.1601	20.3435	18.6492	12.2623	9.77353
100.72	128.894	125.477	89.127	90.8014	58.4706	58.4795	35.4698	34.1601	20.3383	18.6492	12.2601	9.77353
101.72	128.945	125.477	89.1511	90.8014	58.4887	58.4795	35.46	34.1601	20.3406	18.6492	12.2708	9.77353
102.72	128.981	125.477	89.1773	90.8014	58.5146	58.4795	35.45	34.1601	20.3271	18.6492	12.2768	9.77353
103.72	129.017	125.477	89.2017	90.8014	58.5311	58.4795	35.4515	34.1601	20.3108	18.6492	12.264	9.77353
104.72	129.051	125.477	89.2457	90.8014	58.5374	58.4795	35.45	34.1601	20.3027	18.6492	12.2478	9.77353
105.72	129.071	125.477	89.2564	90.8014	58.5488	58.4795	35.4418	34.1601	20.2854	18.6492	12.2351	9.77353
106.72	129.098	125.477	89.268	90.8014	58.5524	58.4795	35.4384	34.1601	20.2738	18.6492	12.2088	9.77353
107.72	129.136	125.477	89.2946	90.8014	58.5531	58.4795	35.4288	34.1601	20.2662	18.6492	12.1963	9.77353
108.72	129.194	125.477	89.3105	90.8014	58.5834	58.4795	35.437	34.1601	20.2791	18.6492	12.1946	9.77353
109.72	129.237	125.477	89.3591	90.8014	58.5982	58.4795	35.468	34.1601	20.3072	18.6492	12.218	9.77353
110.72	129.297	125.477	89.389	90.8014	58.6194	58.4795	35.4797	34.1601	20.327	18.6492	12.249	9.77353
111.72	129.343	125.477	89.4361	90.8014	58.6453	58.4795	35.4908	34.1601	20.3379	18.6492	12.2696	9.77353
112.72	129.383	125.477	89.4595	90.8014	58.6788	58.4795	35.5121	34.1601	20.3464	18.6492	12.2786	9.77353
113.72	129.378	125.477	89.4745	90.8014	58.6774	58.4795	35.5106	34.1601	20.3347	18.6492	12.2859	9.77353
114.72	129.374	125.477	89.4815	90.8014	58.6641	58.4795	35.4941	34.1601	20.311	18.6492	12.2561	9.77353
115.72	129.369	125.477	89.4918	90.8014	58.6431	58.4795	35.4629	34.1601	20.3009	18.6492	12.2408	9.77353
116.72	129.396	125.477	89.4916	90.8014	58.6233	58.4795	35.4387	34.1601	20.3077	18.6492	12.2297	9.77353
117.72	129.427	125.477	89.479	90.8014	58.5955	58.4795	35.4648	34.1601	20.2766	18.6492	12.2362	9.77353
118.72	129.382	125.477	89.4538	90.8014	58.6711	58.4795	35.4648	34.1601	20.3534	18.6492	12.3097	9.77353
119.72	133.064	125.477	89.6068	90.8014	59.6011	58.4795	35.4764	34.1601	19.9441	18.6492	12.0009	9.77353
120.72	106.246	113.375	85.4036	89.0363	51.8261	54.5966	35.4384	34.1601	19.6689	18.2867	11.7648	9.42809
121.72	86.4598	96.2652	67.5729	75.5997	42.0967	46.3575	28.756	29.872	15.6328	15.5272	9.65098	8.00533
122.72	69.8003	81.7377	54.6894	64.191	34.3124	39.3618	23.6334	25.3641	12.9864	13.184	8.2755	6.79728
123.72	57.3133	69.4027	44.7165	54.504	28.3607	33.4218	19.4301	21.5364	10.954	11.1945	7.10295	5.77153
124.72	47.8626	58.9291	37.2843	46.2788	24.0162	28.3782	16.3751	18.2864	9.30058	9.50514	6.31584	4.90057
125.72	40.6793	50.0362	31.6405	39.295	20.6032	24.0957	14.068	15.5269	8.15667	8.07075	5.73065	4.16104
126.72	34.9908	42.4853	27.2753	33.365	17.9542	20.4595	12.2211	13.1838	7.26112	6.85283	5.25416	3.53312
127.72	30.5119	36.0739	23.7386	28.33	15.8311	17.372	10.7853	11.1943	6.56112	5.81869	4.90145	2.99995
128.72	26.9249	30.6301	20.9423	24.0548	14.1758	14.7505	9.72156	9.50498	5.98207	4.94062	4.5868	2.54724
129.72	23.9935	26.0078	18.7702	20.4248	12.8677	12.5245	8.8457	8.07062	5.56639	4.19505	4.33604	2.16285
130.72	21.6364	22.083	16.9996	17.3425	11.7965	10.6345	8.18872	6.85271	5.23638	3.56199	4.15508	1.83646
131.72	19.7223	18.7505	15.5082	14.7254	10.8478	9.02967	7.57422	5.8186	4.90493	3.02447	3.93594	1.55933
132.72	18.1528	15.9209	14.3039	12.5033	10.1055	7.66704	7.07422	4.94054	4.66752	2.56806	3.78397	1.32401
133.72	16.8464	13.5184	13.3506	10.6164	9.57971	6.51004	6.63367	4.19498	4.45002	2.18052	3.69184	1.1242
134.72	15.7207	11.4784	12.5494	9.01435	9.09229	5.52763	6.35864	3.56193	4.28359	1.85147	3.62197	0.95455
135.72	14.7789	9.7462	11.8385	7.65402	8.61761	4.69348	6.03979	3.02442	4.0972	1.57207	3.45243	0.810499
136.72	13.999	8.27544	11.2412	6.49899	8.19189	3.98521	5.80469	2.56801	3.90627	1.33483	3.31704	0.688187
137.72	13.377	7.02662	10.7326	5.51825	7.89954	3.38381	5.55127	2.18049	3.81868	1.13339	3.2718	0.584333
138.72	12.7543	5.96626	10.3384	4.68551	7.64124	2.87318	5.40723	1.85144	3.70449	0.962351	3.26992	0.496152
139.72	12.2275	5.06592	9.92615	3.97844	7.40375	2.4396	5.20313	1.57204	3.58636	0.817123	3.12945	0.421278
140.72	11.8462	4.30144	9.62117	3.37807	7.27386	2.07145	5.02063	1.33481	3.52501	0.693811	3.08763	0.357703
141.72	11.5126	3.65233	9.36958	2.8683	7.08459	1.75885	4.97925	1.13337	3.476	0.589109	3.08306	0.303722
142.72	11.1613	3.10117	9.08552	2.43546	6.8927	1.49343	4.88794	0.962336	3.36748	0.500206	3.02788	0.257887
143.72	10.9089	2.63318	8.87686	2.06793	6.789	1.26806	4.78516	0.81711	3.32706	0.42472	2.97794	0.21897
144.72	10.659	2.23582	8.71101	1.75587	6.66388	1.0767	4.74219	0.6938	3.33776	0.360626	2.93627	0.185925
145.72	10.4972	1.89842	8.53843	1.4909	6.58484	0.914213	4.70496	0.589099	3.33498	0.306204	2.94997	0.157867
146.72	10.2805	1.61194	8.40789	1.26591	6.49335	0.776249	4.70032	0.500198	3.30629	0.259995	2.94081	0.134044
147.72	10.0174	1.36868	8.25051	1.07487	6.36493	0.659106	4.62988	0.424713	3.22233	0.220759	2.89786	0.113815
148.72	9.88476	1.16214	8.1366	0.912661	6.23511	0.55964	4.52002	0.36062	3.15723	0.187445	2.85034	0.0966393
149.72	9.71611	0.986758	7.99934	0.774932	6.1781	0.475185	4.44836	0.306199	3.1342	0.159157	2.82109	0.0820555
150.72	9.55071	0.837847	7.89338	0.657987	6.14966	0.403475	4.39929	0.259991	3.12139	0.135139	2.79521	0.0696725
151.72	9.4208	0.711407	7.77854	0.55869	6.08093	0.342587	4.35193	0.220756	3.08474	0.114745	2.76504	0.0591583
152.72	9.25466	0.604049	7.72568	0.474379	6.0105	0.290887	4.3114	0.187441	3.05447	0.097429	2.746	0.0502307
153.72	9.12568	0.512892	7.64873	0.40279	5.9231	0.24699	4.28979	0.159155	3.04206	0.0827261	2.70588	0.0426504
154.72	9.05483	0.435492	7.55772	0.342005	5.85803	0.209716	4.25391	0.135137	3.02187	0.0702419	2.69546	0.0362141
155.72	8.99185	0.369772	7.47861	0.290393	5.82013	0.178068	4.24927	0.114743	2.99154	0.0596417	2.69442	0.030749
156.72	8.86794	0.31397	7.38621	0.24657	5.78809	0.151196	4.20349	0.0974274	2.9584	0.0506412	2.68276	0.0261087
157.72	8.74692	0.266589	7.29495	0.20936	5.76135	0.128379	4.14099	0.0827247	2.92344	0.042999	2.64426	0.0221686
158.72	8.6366	0.226358	7.22705	0.177766	5.7132	0.109005	4.11328	0.0702408	2.91534	0.03651	2.6264	0.0188232
159.72	8.53574	0.192198	7.16799	0.150939	5.65369	0.0925555	4.08716	0.0596407	2.90342	0.0310003	2.59653	0.0159826
160.72	8.45549	0.163194	7.11458	0.128161	5.58588	0.078588	4.06958	0.0506404	2.90697	0.0263221	2.57103	0.0135707
161.72	8.42932	0.138566	7.04126	0.10882	5.56964	0.0667283	4.03699	0.0429983	2.88434	0.0223498	2.5661	0.0115227
162.72	8.38498	0.117655	6.98733	0.0923984	5.56207	0.0566584	4.03674	0.0365094	2.8704	0.018977	2.58182	0.00978382
163.72	8.30825	0.0999	6.9282	0.0784546	5.52722	0.0481081	4.04175	0.0309998	2.86782	0.0161132	2.59219	0.00830735
164.72	8.22849	0.0848241	6.8677	0.066615	5.49695	0.0408481	4.0321	0.0263216	2.8563	0.0136816	2.56894	0.00705369
165.72	8.16543	0.0720233	6.83616	0.0565622	5.45251	0.0346837	3.99756	0.0223494	2.85159	0.0116169	2.55276	0.00598922
166.72	8.11113	0.0611543	6.81795	0.0480264	5.42236	0.0294496	3.98096	0.0189767	2.85369	0.00986378	2.55669	0.00508539
167.72	8.04153	0.0519255	6.80125	0.0407787	5.40283	0.0250054	3.96472	0.0161129	2.83791	0.00837524	2.55911	0.00431796
168.72	7.97771	0.0440895	6.77241	0.0346248	5.38861	0.0212318	3.95203	0.0136813	2.83971	0.00711134	2.58202	0.00366634
169.72	7.91562	0.037436	6.76064	0.0293996	5.37427	0.0180277	3.93396	0.0116167	2.84727	0.00603817	2.58799	0.00311305
170.72	7.88413	0.0317865	6.72146	0.0249629	5.35345	0.0153072	3.92871	0.00986362	2.84257	0.00512695	2.5767	0.00264326
171.72	7.87551	0.0269896	6.68943	0.0211958	5.32721	0.0129972	3.91882	0.0083751	2.86129	0.00435324	2.56771	0.00224437
172.72	7.85029	0.0229166	6.6751	0.0179971	5.3158	0.0110358	3.92224	0.00711122	2.85762	0.0036963	2.56904	0.00190567
173.72	7.81138	0.0194583	6.60964	0.0152812	5.29645	0.00937038	3.901	0.00603807	2.84977	0.00313849	2.55448	0.00161809
174.72	7.75444	0.0165218	6.57502	0.0129751	5.26764	0.0079563	3.89136	0.00512687	2.833	0.00266486	2.55382	0.0013739
175.72	7.70049	0.0140285	6.52791	0.011017	5.2561	0.00675562	3.86987	0.00435317	2.8001	0.00226271	2.53423	0.00116657
176.72	7.64304	0.0119115	6.51528	0.00935447	5.23309	0.00573613	3.85986	0.00369624	2.79545	0.00192124	2.51969	0.000990521
177.72	7.58516	0.0101139	6.49651	0.00794279	5.21112	0.00487049	3.83594	0.00313844	2.77638	0.00163131	2.49257	0.000841042
178.72	7.55542	0.00858765	6.45752	0.00674415	5.18073	0.00413549	3.82458	0.00266482	2.75372	0.00138513	2.48151	0.00071412
179.72	7.52173	0.00729169	6.44177	0.00572639	5.17719	0.0035114	3.84094	0.00226267	2.75482	0.0011761	2.47601	0.000606353
180.72	7.49055	0.0061913	6.41387	0.00486222	5.15027	0.0029815	3.82373	0.00192121	2.74885	0.000998616	2.47322	0.000514848
181.72	7.43655	0.00525698	6.36851	0.00412847	5.11511	0.00253156	3.81445	0.00163128	2.74148	0.000847915	2.46084	0.000437153
182.72	7.39658	0.00446365	6.33828	0.00350544	5.0744	0.00214952	3.81287	0.00138511	2.72733	0.000719956	2.43863	0.000371182
183.72	7.37268	0.00379004	6.30322	0.00297644	5.0423	0.00182514	3.77185	0.00117608	2.71429	0.000611308	2.42682	0.000315167
184.72	7.29915	0.00321809	6.28508	0.00252726	5.01129	0.00154971	3.78162	0.000998599	2.70631	0.000519056	2.4286	0.000267605
185.72	7.26782	0.00273245	6.23962	0.00214588	4.9942	0.00131584	3.75232	0.000847901	2.67718	0.000440725	2.40155	0.000227221
186.72	7.22561	0.00232009	6.20176	0.00182204	4.96655	0.00111727	3.73755	0.000719945	2.68069	0.000374216	2.3937	0.000192931
187.72	7.16865	0.00196997	6.16728	0.00154708	4.95258	0.000948663	3.71472	0.000611298	2.66383	0.000317743	2.37684	0.000163816
188.72	7.129	0.00167268	6.1155	0.00131361	4.909	0.000805501	3.68201	0.000519047	2.6348	0.000269792	2.35599	0.000139095
189.72	7.08801	0.00142026	6.0946	0.00111537	4.8775	0.000683943	3.6626	0.000440718	2.61554	0.000229078	2.34662	0.000118104
190.72	7.05547	0.00120593	6.07039	0.000947053	4.87891	0.000580729	3.64124	0.000374209	2.60112	0.000194508	2.35332	0.000100281
191.72	7.01084	0.00102394	6.04605	0.000804133	4.86023	0.000493092	3.63953	0.000317738	2.60459	0.000165155	2.34727	8.51476e-05
192.72	6.97603	0.000869419	6.01751	0.000682782	4.84381	0.00041868	3.62463	0.000269788	2.59095	0.000140231	2.31996	7.2298e-05
193.72	6.93608	0.000738215	6.00544	0.000579744	4.82526	0.000355497	3.62036	0.000229074	2.59569	0.000119069	2.3087	6.13876e-05
194.72	6.90322	0.000626812	5.98679	0.000492255	4.81213	0.000301849	3.62183	0.000194505	2.58645	0.000101101	2.30728	5.21236e-05
195.72	6.8751	0.00053222	5.97024	0.000417969	4.77917	0.000256297	3.60156	0.000165152	2.58079	8.58435e-05	2.30356	4.42576e-05
196.72	6.83477	0.000451903	5.94587	0.000354893	4.75238	0.000217619	3.57263	0.000140229	2.56566	7.28889e-05	2.28844	3.75787e-05
197.72	6.799	0.000383706	5.93281	0.000301336	4.70416	0.000184778	3.5531	0.000119067	2.55858	6.18892e-05	2.2849	3.19077e-05
198.72	6.77034	0.000325801	5.8947	0.000255862	4.66156	0.000156894	3.51367	0.000101099	2.54164	5.25496e-05	2.26442	2.70926e-05
199.72	6.75244	0.000276635	5.84998	0.00021725	4.61841	0.000133217	3.49097	8.58421e-05	2.51648	4.46193e-05	2.24243	2.3004e-05
200.72	6.73516	0.000234888	5.83638	0.000184465	4.61176	0.000113113	3.51013	7.28877e-05	2.51024	3.78858e-05	2.23961	1.95325e-05
201.72	6.70723	0.000199441	5.81353	0.000156627	4.59552	9.60433e-05	3.50732	6.18882e-05	2.51246	3.21685e-05	2.22511	1.65849e-05
202.72	6.65818	0.000169343	5.78396	0.000132991	4.58459	8.15494e-05	3.49683	5.25487e-05	2.51084	2.7314e-05	2.19736	1.4082e-05
203.72	6.63323	0.000143788	5.75862	0.000112921	4.58575	6.92428e-05	3.49097	4.46186e-05	2.50963	2.3192e-05	2.19017	1.19569e-05
204.72	6.58301	0.000122089	5.75293	9.58803e-05	4.56177	5.87934e-05	3.5011	3.78852e-05	2.51306	1.96921e-05	2.18359	1.01525e-05
205.72	6.55566	0.000103665	5.72632	8.1411e-05	4.55042	4.99209e-05	3.47266	3.2168e-05	2.50623	1.67204e-05	2.16028	8.6204e-06
206.72	6.54228	8.80206e-05	5.70845	6.91253e-05	4.5506	4.23874e-05	3.47961	2.73135e-05	2.50157	1.41971e-05	2.16417	7.3195e-06
207.72	6.51077	7.47374e-05	5.71397	5.86936e-05	4.53815	3.59907e-05	3.4906	2.31916e-05	2.50655	1.20546e-05	2.16537	6.21492e-06
208.72	6.45149	6.34588e-05	5.69341	4.98362e-05	4.51312	3.05594e-05	3.46448	1.96918e-05	2.50221	1.02355e-05	2.16444	5.27703e-06
209.72	6.4345	5.38823e-05	5.64973	4.23154e-05	4.49988	2.59477e-05	3.42224	1.67201e-05	2.48821	8.69085e-06	2.1574	4.48067e-06
210.72	6.41106	4.57509e-05	5.63435	3.59296e-05	4.49402	2.20319e-05	3.43054	1.41969e-05	2.48552	7.37932e-06	2.15569	3.8045e-06
211.72	6.37056	3.88467e-05	5.60466	3.05075e-05	4.47699	1.87071e-05	3.42419	1.20544e-05	2.4684	6.26571e-06	2.14857	3.23036e-06
212.72	6.3415	3.29843e-05	5.55461	2.59036e-05	4.45197	1.5884e-05	3.40112	1.02353e-05	2.45216	5.32015e-06	2.12416	2.74287e-06
213.72	6.30911	2.80067e-05	5.51377	2.19945e-05	4.43213	1.3487e-05	3.3844	8.69071e-06	2.42263	4.51729e-06	2.12087	2.32894e-06
214.72	6.28672	2.37802e-05	5.48416	1.86753e-05	4.40222	1.14517e-05	3.37036	7.3792e-06	2.38975	3.83559e-06	2.11057	1.97748e-06
215.72	6.26736	2.01915e-05	5.4448	1.5857e-05	4.38074	9.72349e-06	3.35852	6.2656e-06	2.39297	3.25676e-06	2.09817	1.67906e-06
216.72	6.24817	1.71444e-05	5.41455	1.34641e-05	4.36658	8.25612e-06	3.3634	5.32006e-06	2.37512	2.76528e-06	2.09595	1.42568e-06
217.72	6.21689	1.45572e-05	5.40518	1.14322e-05	4.37122	7.01019e-06	3.34216	4.51722e-06	2.37363	2.34798e-06	2.09763	1.21053e-06
218.72	6.20737	1.23604e-05	5.38687	9.70698e-06	4.37097	5.95229e-06	3.3407	3.83552e-06	2.36594	1.99364e-06	2.10862	1.02785e-06
219.72	6.18882	1.04951e-05	5.36624	8.2421e-06	4.36646	5.05403e-06	3.34216	3.25671e-06	2.36936	1.69278e-06	2.11472	8.72735e-07
220.72	6.17434	8.91126e-06	5.32834	6.99829e-06	4.36176	4.29133e-06	3.3241	2.76524e-06	2.36312	1.43733e-06	2.10531	7.41031e-07
221.72	6.1269	7.56647e-06	5.29619	5.94218e-06	4.34149	3.64373e-06	3.30469	2.34794e-06	2.34254	1.22042e-06	2.06495	6.29202e-07
222.72	6.10315	6.42461e-06	5.24805	5.04545e-06	4.31128	3.09385e-06	3.27344	1.99361e-06	2.33252	1.03625e-06	2.04675	5.3425e-07
223.72	6.07913	5.45508e-06	5.23765	4.28404e-06	4.28674	2.62696e-06	3.26404	1.69276e-06	2.32656	8.79867e-07	2.03945	4.53626e-07
224.72	6.05869	4.63185e-06	5.22341	3.63754e-06	4.27509	2.23053e-06	3.25891	1.4373e-06	2.3212	7.47087e-07	2.03727	3.8517e-07
225.72	6.03918	3.93286e-06	5.20398	3.0886e-06	4.26575	1.89392e-06	3.25073	1.2204e-06	2.31299	6.34344e-07	2.03381	3.27044e-07
226.72	6.0177	3.33936e-06	5.1825	2.6225e-06	4.24573	1.60811e-06	3.24072	1.03623e-06	2.32092	5.38616e-07	2.02563	2.7769e-07
227.72	5.99656	2.83542e-06	5.16482	2.22674e-06	4.22522	1.36543e-06	3.23083	8.79853e-07	2.31162	4.57333e-07	2.02439	2.35784e-07
228.72	5.97991	2.40752e-06	5.14534	1.8907e-06	4.20721	1.15937e-06	3.21326	7.47075e-07	2.30529	3.88317e-07	2.03478	2.00202e-07
229.72	5.94963	2.04421e-06	5.13533	1.60538e-06	4.1889	9.84412e-07	3.2196	6.34334e-07	2.30492	3.29717e-07	2.02428	1.69989e-07
230.72	5.92354	1.73571e-06	5.12187	1.36311e-06	4.16833	8.35855e-07	3.22314	5.38607e-07	2.28962	2.79959e-07	2.02388	1.44336e-07
231.72	5.92676	1.47378e-06	5.09607	1.1574e-06	4.14862	7.09716e-07	3.20337	4.57326e-07	2.26312	2.37711e-07	1.99921	1.22555e-07
232.72	5.90862	1.25137e-06	5.08455	9.82741e-07	4.1297	6.02613e-07	3.20154	3.88311e-07	2.25389	2.01838e-07	1.98827	1.0406e-07
233.72	5.90142	1.06253e-06	5.0738	8.34436e-07	4.12738	5.11673e-07	3.19995	3.29711e-07	2.26122	1.71379e-07	1.98705	8.83563e-08
234.72	5.89727	9.02182e-07	5.05525	7.08512e-07	4.11859	4.34457e-07	3.20325	2.79955e-07	2.25414	1.45516e-07	1.9785	7.50225e-08
235.72	5.88088	7.66034e-07	5.04539	6.0159e-07	4.09064	3.68893e-07	3.20386	2.37707e-07	2.25399	1.23556e-07	1.967	6.37008e-08
236.72	5.86272	6.50432e-07	5.03535	5.10805e-07	4.08093	3.13224e-07	3.1936	2.01835e-07	2.24126	1.0491e-07	1.96233	5.40878e-08
237.72	5.8353	5.52276e-07	5.01064	4.33719e-07	4.04883	2.65955e-07	3.16052	1.71376e-07	2.22727	8.90783e-08	1.94968	4.59254e-08
238.72	5.80396	4.68932e-07	4.98608	3.68267e-07	4.02368	2.2582e-07	3.12341	1.45513e-07	2.21362	7.56356e-08	1.9165	3.89948e-08
239.72	5.78813	3.98166e-07	4.96809	3.12692e-07	4.00897	1.91742e-07	3.1134	1.23554e-07	2.19408	6.42214e-08	1.9088	3.31101e-08
240.72	5.7615	3.38079e-07	4.94089	2.65504e-07	3.98999	1.62806e-07	3.10217	1.04909e-07	2.19753	5.45298e-08	1.90237	2.81135e-08
							3.08081	8.90769e-08

## Sheet: biotin-C3b ISG65L2N188A etc.
Cycle: 23 ISG65L2ala 10000 nM_X	Cycle: 23 ISG65L2ala 10000 nM_Y	Fitted Cycle: 23 ISG65L2ala 10_Y	Cycle: 24 ISG65L2ala 5000 nM_Y	Fitted Cycle: 24 ISG65L2ala 50_Y	Cycle: 25 ISG65L2ala 2500 nM_Y	Fitted Cycle: 25 ISG65L2ala 25_Y	Cycle: 26 ISG65L2ala 1250 nM_Y	Fitted Cycle: 26 ISG65L2ala 12_Y	Cycle: 27 ISG65L2ala 625 nM_Y	Fitted Cycle: 27 ISG65L2ala 62_Y	Cycle: 28 ISG65L2ala 312.5 nM_Y	Fitted Cycle: 28 ISG65L2ala 31_Y
-60.16	0.156242	0	0.100544	0	0.0718043	0	0.122213	0	0.135122	0	0.0474797	0
-59.16	0.167961	0	0.0831604	0	0.0706329	0	0.107174	0	0.119888	0	0.0205269	0
-58.16	0.14843	0	0.0812078	0	0.0725856	0	0.101315	0	0.106216	0	0.0361516	0
-57.16	0.14843	0	0.0732	0	0.0815699	0	0.112448	0	0.107779	0	0.0474797	0
-56.16	0.160149	0	0.0831609	0	0.0725856	0	0.132565	0	0.106216	0	0.0459173	0
-55.16	0.14843	0	0.0636292	0	0.0608673	0	0.128658	0	0.0788727	0	0.0517769	0
-54.16	0.138664	0	0.0413637	0	0.0362577	0	0.114596	0	0.0558257	0	0.0482612	0
-53.16	0.126945	0	0.0409732	0	0.0346951	0	0.103658	0	0.0569975	0	0.049433	0
-52.16	0.119133	0	0.0351138	0	0.0464139	0	0.115377	0	0.0589507	0	0.0396674	0
-51.16	0.109367	0	0.0440984	0	0.0413356	0	0.103268	0	0.0476224	0	0.0381048	0
-50.16	0.109367	0	0.0265198	0	0.0491486	0	0.0895958	0	0.0300446	0	0.0107613	0
-49.16	0.0898361	0	0.022614	0	0.06282	0	0.0837367	0	0.0359037	0	0.00685477	0
-48.16	0.109367	0	0.0323796	0	0.0608668	0	0.073971	0	0.0359037	0	0.0166204	0
-47.16	0.109367	0	0.0421453	0	0.0706325	0	0.0817835	0	0.0456693	0	0.0146673	0
-46.16	0.119133	0	0.0401921	0	0.0608668	0	0.0817835	0	0.0456693	0	0.0244329	0
-45.16	0.136711	0	0.0587471	0	0.0764916	0	0.0886196	0	0.0632473	0	0.0420109	0
-44.16	0.146477	0	0.0411685	0	0.0745389	0	0.0847131	0	0.0671538	0	0.0459174	0
-43.16	0.136711	0	0.0321844	0	0.0698512	0	0.0929164	0	0.0765287	0	0.0552922	0
-42.16	0.14843	0	0.0245667	0	0.0784454	0	0.0974083	0	0.0593414	0	0.0517769	0
-41.16	0.138664	0	0.0331612	0	0.087429	0	0.0899868	0	0.0648098	0	0.0670109	0
-40.16	0.150383	0	0.0440984	0	0.0921168	0	0.103268	0	0.0866849	0	0.0674016	0
-39.16	0.150383	0	0.00405908	0	0.105789	0	0.0944787	0	0.0984038	0	0.0693549	0
-38.16	0.203117	0	0.0524185	0	0.121413	0	0.0886196	0	0.0925442	0	0.0634953	0
-37.16	0.298275	0	0.646248	0	0.220948	0	0.219402	0	0.177311	0	0.0450593	0
-36.16	0.507805	0	0.602604	0	0.560137	0	0.282227	0	0.394171	0	0.326292	0
-35.16	0.611712	0	0.378043	0	0.326534	0	0.267234	0	0.254673	0	0.263752	0
-34.16	0.380695	0	-0.20349	0	0.340917	0	0.214257	0	0.173311	0	0.225904	0
-33.16	-0.357977	0	-0.358556	0	-0.397061	0	-0.376008	0	-0.381891	0	-0.32414	0
-32.16	-0.384306	0	0.273964	0	0.0866655	0	0.132831	0	0.226616	0	0.156315	0
-31.16	0.26046	0	0.0201459	0	0.12064	0	0.117679	0	0.0952809	0	0.126859	0
-30.16	-0.0774288	0	-0.079816	0	-0.066038	0	-0.055975	0	-0.0506753	0	-0.00777143	0
-29.16	-0.14735	0	-0.0526173	0	-0.102573	0	-0.0505601	0	-0.0657357	0	-0.0175217	0
-28.16	-0.117975	0	-0.0430896	0	-0.0855391	0	-0.023918	0	-0.0612079	0	-0.00189698	0
-27.16	-0.103134	0	-0.00516766	0	-0.0829938	0	-0.00835735	0	-0.0591895	0	-3.49879e-05	0
-26.16	-0.0921173	0	-0.0529257	0	-0.089023	0	-0.0235827	0	-0.0560338	0	0.00124386	0
-25.16	-0.102821	0	-0.0457845	0	-0.0900731	0	-0.0238016	0	-0.0650361	0	-0.00416112	0
-24.16	-0.0933666	0	-0.0604405	0	-0.0720573	0	-0.0340998	0	-0.0691889	0	-0.0165994	0
-23.16	-0.105009	0	-0.0320666	0	-0.0609767	0	-0.0541302	0	-0.086345	0	-0.0251611	0
-22.16	-0.0784454	0	-0.00749519	0	-0.0287101	0	-0.0691678	0	-0.0649417	0	-0.0303958	0
-21.16	-0.0438347	0	0.0157382	0	0.00508714	0	-0.0327464	0	-0.0359706	0	-0.0115031	0
-20.16	-0.0152416	0	0.0362844	0	0.0194597	0	0.00326586	0	-0.00472307	0	-0.015801	0
-19.16	-0.0153217	0	0.0264352	0	0.0233342	0	0.0122272	0	-0.0133306	0	-0.00448814	0
-18.16	-0.0543823	0	0.0319808	0	0.033179	0	0.0015265	0	-0.00676695	0	0.00363573	0
-17.16	-0.0397739	0	0.013483	0	0.0281621	0	-0.0103035	0	-0.00493999	0	0.00546269	0
-16.16	-0.0344601	0	0.00319175	0	0.0270855	0	-0.00163804	0	-0.00575484	0	0.0159775	0
-15.16	-0.024931	0	-0.0116744	0	0.00285105	0	0.000555262	0	-0.00798629	0	-0.004225	0
-14.16	-0.0168056	0	-0.0205969	0	0.00224058	0	0.00551061	0	-0.0205176	0	-0.0120681	0
-13.16	-0.0100842	0	-0.0314789	0	0.0119124	0	-0.0111986	0	-0.0179085	0	-0.00945898	0
-12.16	-0.0114136	0	-0.024543	0	0.00747605	0	-0.0181233	0	-0.0268482	0	-0.0137066	0
-11.16	-0.021492	0	-0.00413661	0	0.0214448	0	-0.0227616	0	-0.0188482	0	-0.0186002	0
-10.16	-0.00352287	0	-1.25952e-05	0	0.0384113	0	-0.0199982	0	-0.00731506	0	-0.0152725	0
-9.15997	0.00936699	0	0.0116787	0	0.0582084	0	-0.0196237	0	0.0271521	0	0.00162029	0
-8.15997	0.037569	0	0.0272304	0	0.0432432	0	-0.00569429	0	0.0238112	0	0.0126533	0
-7.15997	0.029213	0	0.0142851	0	0.0178661	0	-0.0119524	0	0.000497803	0	-0.0124569	0
-6.15997	0.010931	0	0.00109644	0	0.000505731	0	4.9457e-05	0	-0.0161894	0	-0.0143813	0
-5.15997	0.00116539	0	0.00307493	0	-0.00119524	0	-0.00808367	0	-0.0410658	0	-0.0028502	0
-4.15997	0.009758	0	-0.00285508	0	0.0419605	0	0.0145975	0	0.0157455	0	0.00498044	0
-3.15997	-0.0230541	0	0.0257615	0	0.0329543	0	-0.00941709	0	0.0233522	0	-0.0284285	0
-2.15997	-0.0543842	0	-0.0383032	0	-0.0420429	0	-0.055119	0	0.0106196	0	-0.105145	0
-1.15997	-0.0640678	0	0.672858	0	0.595937	0	0.672256	0	0.775586	0	0.437943	0
-0.159973	-0.533447	0	-0.196916	10.9766	-2.77418	3.48366	-1.45905	2.12679	-1.12587	1.25132	-0.544298	0.627291
0.840027	4.7189	23.2443	17.0999	21.9152	8.78549	9.94545	5.68631	5.37496	3.73169	2.86475	2.48663	1.44158
1.84003	32.6382	40.9884	25.456	29.6028	12.4829	14.8001	7.34346	7.89803	4.18052	4.13908	2.56889	2.09011
2.84003	46.409	51.9011	32.2485	35.0056	17.1737	18.4473	9.91245	9.85786	5.54864	5.14559	3.32319	2.60663
3.84003	55.6141	58.6124	36.9958	38.8027	20.4446	21.1874	11.6845	11.3802	6.48956	5.94055	3.88294	3.01801
4.84003	61.4791	62.7398	40.1819	41.4712	22.8176	23.2459	12.8963	12.5627	7.13906	6.56844	4.09721	3.34565
5.84003	65.1608	65.2781	42.4022	43.3466	24.5655	24.7924	13.7979	13.4812	7.56897	7.06436	4.31961	3.60659
6.84003	67.5863	66.8391	43.9303	44.6646	25.8246	25.9543	14.5033	14.1946	7.91763	7.45605	4.50787	3.81442
7.84003	69.1209	67.7991	45.0278	45.5908	26.7792	26.8272	15.072	14.7488	8.28997	7.76541	4.57694	3.97995
8.84003	70.0587	68.3895	45.8234	46.2418	27.5695	27.483	15.4833	15.1793	8.49958	8.00976	4.69288	4.11179
9.84003	70.7082	68.7526	46.4267	46.6992	28.1286	27.9757	15.8416	15.5137	8.73623	8.20275	4.78726	4.21679
10.84	71.0834	68.9759	46.855	47.0208	28.5564	28.3458	16.1749	15.7734	8.93105	8.35519	4.95442	4.30041
11.84	71.3371	69.1132	47.1219	47.2467	28.8725	28.6238	16.4435	15.9752	9.07036	8.47559	4.98123	4.36701
12.84	71.4603	69.1977	47.3656	47.4055	29.136	28.8328	16.6235	16.1319	9.20966	8.57068	5.0274	4.42005
13.84	71.5836	69.2496	47.5397	47.5171	29.3489	28.9897	16.7919	16.2536	9.29762	8.64579	5.04287	4.46229
14.84	71.641	69.2816	47.592	47.5956	29.4514	29.1076	16.8423	16.3482	9.32495	8.70511	5.08379	4.49594
15.84	71.5887	69.3012	47.6737	47.6507	29.5481	29.1962	16.9391	16.4216	9.37113	8.75196	5.12137	4.52273
16.84	71.6058	69.3133	47.7511	47.6894	29.7184	29.2628	17.0456	16.4787	9.47231	8.78896	5.1706	4.54407
17.84	71.527	69.3207	47.8033	47.7166	29.808	29.3128	17.0908	16.523	9.49778	8.81819	5.20701	4.56107
18.84	71.5405	69.3252	47.8418	47.7358	29.8666	29.3503	17.134	16.5574	9.51401	8.84127	5.23184	4.5746
19.84	71.503	69.328	47.8421	47.7492	29.908	29.3785	17.1353	16.5841	9.5527	8.8595	5.25068	4.58539
20.84	71.4555	69.3298	47.8539	47.7586	29.9124	29.3997	17.2203	16.6049	9.61615	8.8739	5.23749	4.59397
21.84	71.4448	69.3308	47.8695	47.7653	29.9799	29.4157	17.2671	16.621	9.62128	8.88527	5.26567	4.60081
22.84	71.4055	69.3315	47.8983	47.7699	30.0129	29.4276	17.3006	16.6335	9.61811	8.89425	5.29648	4.60626
23.84	71.2894	69.3319	47.9167	47.7732	30.0126	29.4366	17.3097	16.6433	9.63862	8.90135	5.32325	4.61059
24.84	71.2032	69.3321	47.8916	47.7755	29.9897	29.4434	17.3675	16.6508	9.66879	8.90695	5.30459	4.61405
25.84	71.1951	69.3323	47.8877	47.7771	30.0172	29.4484	17.4236	16.6567	9.74342	8.91138	5.33547	4.6168
26.84	71.159	69.3324	47.9215	47.7783	30.044	29.4522	17.451	16.6613	9.74698	8.91487	5.37184	4.61899
27.84	71.1494	69.3324	47.9528	47.7791	30.1042	29.4551	17.4278	16.6648	9.74639	8.91763	5.39867	4.62073
28.84	71.0841	69.3325	47.9464	47.7796	30.1309	29.4573	17.4283	16.6676	9.77098	8.91981	5.39584	4.62212
29.84	71.1072	69.3325	47.9293	47.78	30.1381	29.4589	17.4556	16.6697	9.80253	8.92153	5.42035	4.62323
30.84	71.0847	69.3325	47.9179	47.7803	30.1473	29.4601	17.468	16.6713	9.80234	8.92289	5.45923	4.62411
31.84	71.0646	69.3325	47.93	47.7805	30.1622	29.461	17.4885	16.6726	9.80378	8.92397	5.48723	4.62481
32.84	71.0334	69.3325	47.8784	47.7806	30.1457	29.4617	17.4891	16.6736	9.78405	8.92482	5.44953	4.62537
33.84	70.9322	69.3325	47.8029	47.7807	30.148	29.4622	17.4756	16.6744	9.79027	8.92549	5.4445	4.62582
34.84	70.8537	69.3325	47.807	47.7808	30.1539	29.4626	17.452	16.675	9.78607	8.92602	5.43359	4.62617
35.84	70.8202	69.3325	47.811	47.7809	30.1147	29.4629	17.4182	16.6755	9.78067	8.92643	5.39381	4.62646
36.84	70.7413	69.3325	47.784	47.7809	30.071	29.4631	17.4163	16.6759	9.77481	8.92676	5.37506	4.62668
37.84	70.7155	69.3325	47.7297	47.7809	30.0314	29.4632	17.4084	16.6761	9.777	8.92703	5.40154	4.62686
38.84	70.6253	69.3325	47.7082	47.7809	30.0379	29.4634	17.4359	16.6764	9.81762	8.92723	5.42607	4.627
39.84	70.609	69.3325	47.7478	47.7809	30.0354	29.4635	17.4478	16.6765	9.83747	8.92739	5.45256	4.62712
40.84	70.6355	69.3325	47.7334	47.7809	30.0385	29.4635	17.4578	16.6767	9.82629	8.92752	5.45232	4.62721
41.84	70.5996	69.3325	47.7098	47.781	29.9977	29.4636	17.4433	16.6768	9.8092	8.92762	5.44851	4.62728
42.84	70.5605	69.3325	47.6815	47.781	29.9849	29.4636	17.4245	16.6768	9.80675	8.9277	5.43942	4.62734
43.84	70.5324	69.3325	47.6722	47.781	29.9741	29.4637	17.3936	16.6769	9.79717	8.92777	5.43305	4.62738
44.84	70.4804	69.3325	47.6767	47.781	29.9815	29.4637	17.3849	16.677	9.79183	8.92782	5.4409	4.62742
45.84	70.4786	69.3325	47.6537	47.781	29.98	29.4637	17.3873	16.677	9.78317	8.92786	5.44709	4.62745
46.84	70.4563	69.3325	47.6329	47.781	29.9729	29.4637	17.3833	16.677	9.77865	8.92789	5.43593	4.62747
47.84	70.4199	69.3325	47.6314	47.781	29.9622	29.4637	17.4015	16.677	9.78419	8.92791	5.44428	4.62749
48.84	70.3352	69.3325	47.6033	47.781	29.9439	29.4637	17.3996	16.6771	9.78684	8.92793	5.43779	4.6275
49.84	70.2891	69.3325	47.5711	47.781	29.9466	29.4637	17.4018	16.6771	9.79175	8.92795	5.43887	4.62752
50.84	70.3009	69.3325	47.5615	47.781	29.9561	29.4637	17.4082	16.6771	9.79982	8.92796	5.45874	4.62752
51.84	70.2898	69.3325	47.5682	47.781	29.9512	29.4637	17.3979	16.6771	9.78481	8.92797	5.46826	4.62753
52.84	70.2876	69.3325	47.5869	47.781	29.9724	29.4637	17.4055	16.6771	9.79473	8.92798	5.47474	4.62754
53.84	70.2649	69.3325	47.5964	47.781	29.9708	29.4637	17.4226	16.6771	9.79698	8.92798	5.46903	4.62754
54.84	70.2517	69.3325	47.581	47.781	29.961	29.4637	17.4201	16.6771	9.81373	8.92799	5.45937	4.62755
55.84	70.2403	69.3325	47.5746	47.781	29.9567	29.4637	17.4198	16.6771	9.81161	8.92799	5.45912	4.62755
56.84	70.229	69.3325	47.5545	47.781	29.9409	29.4637	17.4032	16.6771	9.7988	8.92799	5.4592	4.62755
57.84	70.1747	69.3325	47.5393	47.781	29.9442	29.4637	17.4018	16.6771	9.80121	8.928	5.46006	4.62755
58.84	70.1309	69.3325	47.5104	47.781	29.9328	29.4637	17.3717	16.6771	9.78715	8.928	5.46553	4.62756
59.84	70.0969	69.3325	47.5184	47.781	29.8991	29.4637	17.3553	16.6771	9.78192	8.928	5.46029	4.62756
60.84	70.059	69.3325	47.5111	47.781	29.8617	29.4637	17.3411	16.6771	9.78325	8.928	5.44053	4.62756
61.84	70.0478	69.3325	47.5011	47.781	29.8341	29.4637	17.3432	16.6771	9.77528	8.928	5.42436	4.62756
62.84	70.043	69.3325	47.5266	47.781	29.8133	29.4637	17.3462	16.6771	9.7938	8.928	5.41982	4.62756
63.84	70.049	69.3325	47.4955	47.781	29.7702	29.4637	17.3356	16.6771	9.79982	8.928	5.41328	4.62756
64.84	70.0215	69.3325	47.4303	47.781	29.777	29.4637	17.3701	16.6771	9.81723	8.928	5.41709	4.62756
65.84	69.9021	69.3325	47.4154	47.781	29.7713	29.4637	17.3789	16.6771	9.81403	8.928	5.40451	4.62756
66.84	69.765	69.3325	47.3697	47.781	29.7267	29.4637	17.3563	16.6771	9.80006	8.928	5.40539	4.62756
67.84	69.6397	69.3325	47.2968	47.781	29.7075	29.4637	17.3249	16.6771	9.78224	8.928	5.42476	4.62756
68.84	69.5401	69.3325	47.2085	47.781	29.6785	29.4637	17.2944	16.6771	9.76973	8.928	5.4188	4.62756
69.84	69.4144	69.3325	47.1243	47.781	29.6481	29.4637	17.2777	16.6771	9.74451	8.928	5.42453	4.62756
70.84	69.2545	69.3325	47.0342	47.781	29.5838	29.4637	17.2475	16.6771	9.76276	8.928	5.43004	4.62756
71.84	69.1089	69.3325	46.9722	47.781	29.5268	29.4637	17.2402	16.6771	9.75256	8.92801	5.47007	4.62756
72.84	68.9765	69.3325	46.8887	47.781	29.4658	29.4637	17.2264	16.6771	9.72425	8.92801	5.4566	4.62756
73.84	68.8621	69.3325	46.8386	47.781	29.4166	29.4637	17.2079	16.6771	9.70856	8.92801	5.43959	4.62756
74.84	68.743	69.3325	46.7874	47.781	29.4016	29.4637	17.2065	16.6771	9.68686	8.92801	5.4371	4.62756
75.84	68.6469	69.3325	46.7515	47.781	29.3771	29.4637	17.1934	16.6771	9.66354	8.92801	5.42864	4.62756
76.84	68.5832	69.3325	46.6863	47.781	29.3429	29.4637	17.1608	16.6771	9.67692	8.92801	5.39435	4.62756
77.84	68.5048	69.3325	46.6437	47.781	29.3245	29.4637	17.1406	16.6771	9.687	8.92801	5.37865	4.62756
78.84	68.4133	69.3325	46.6342	47.781	29.3175	29.4637	17.1269	16.6771	9.66793	8.92801	5.37951	4.62756
79.84	68.3707	69.3325	46.6076	47.781	29.3073	29.4637	17.13	16.6771	9.65895	8.92801	5.38967	4.62756
80.84	68.3313	69.3325	46.5914	47.781	29.2953	29.4637	17.1232	16.6771	9.65042	8.92801	5.42059	4.62756
81.84	68.268	69.3325	46.5642	47.781	29.2842	29.4637	17.1069	16.6771	9.63389	8.92801	5.42507	4.62756
82.84	68.2255	69.3325	46.5805	47.781	29.2841	29.4637	17.12	16.6771	9.61895	8.92801	5.42975	4.62756
83.84	68.2028	69.3325	46.5893	47.781	29.2944	29.4637	17.1222	16.6771	9.61589	8.92801	5.43809	4.62756
84.84	68.1619	69.3325	46.552	47.781	29.3052	29.4637	17.1303	16.6771	9.6235	8.92801	5.41976	4.62756
85.84	68.1148	69.3325	46.4783	47.781	29.2803	29.4637	17.1249	16.6771	9.61511	8.92801	5.38996	4.62756
86.84	68.0603	69.3325	46.4613	47.781	29.2696	29.4637	17.1067	16.6771	9.61067	8.92801	5.39842	4.62756
87.84	68.0201	69.3325	46.453	47.781	29.27	29.4637	17.0944	16.6771	9.59545	8.92801	5.38828	4.62756
88.84	68.0462	69.3325	46.4475	47.781	29.2516	29.4637	17.0747	16.6771	9.59425	8.92801	5.38543	4.62756
89.84	68.0526	69.3325	46.4346	47.781	29.2479	29.4637	17.0608	16.6771	9.58387	8.92801	5.40568	4.62756
90.84	68.0248	69.3325	46.4123	47.781	29.2495	29.4637	17.0633	16.6771	9.57536	8.92801	5.401	4.62756
91.84	67.9791	69.3325	46.4395	47.781	29.2306	29.4637	17.0593	16.6771	9.57254	8.92801	5.39342	4.62756
92.84	67.9584	69.3325	46.4327	47.781	29.2386	29.4637	17.0801	16.6771	9.58708	8.92801	5.40138	4.62756
93.84	67.9599	69.3325	46.4517	47.781	29.2408	29.4637	17.0862	16.6771	9.58833	8.92801	5.40264	4.62756
94.84	67.9791	69.3325	46.4418	47.781	29.2349	29.4637	17.0756	16.6771	9.59084	8.92801	5.39218	4.62756
95.84	67.9778	69.3325	46.4558	47.781	29.2446	29.4637	17.0789	16.6771	9.5965	8.92801	5.38581	4.62756
96.84	68.0119	69.3325	46.4691	47.781	29.2531	29.4637	17.0773	16.6771	9.58201	8.92801	5.37288	4.62756
97.84	68.0479	69.3325	46.4578	47.781	29.2467	29.4637	17.0602	16.6771	9.57169	8.92801	5.34818	4.62756
98.84	68.0642	69.3325	46.4705	47.781	29.2279	29.4637	17.0475	16.6771	9.54872	8.92801	5.33209	4.62756
99.84	68.0708	69.3325	46.4655	47.781	29.1988	29.4637	17.0383	16.6771	9.54026	8.92801	5.33113	4.62756
100.84	68.0916	69.3325	46.4533	47.781	29.1838	29.4637	17.0241	16.6771	9.52295	8.92801	5.32398	4.62756
101.84	68.1197	69.3325	46.4329	47.781	29.1689	29.4637	17.0052	16.6771	9.49825	8.92801	5.32865	4.62756
102.84	68.1407	69.3325	46.4349	47.781	29.1703	29.4637	17.0092	16.6771	9.49886	8.92801	5.33926	4.62756
103.84	68.1717	69.3325	46.447	47.781	29.1654	29.4637	17.005	16.6771	9.47934	8.92801	5.34248	4.62756
104.84	68.2013	69.3325	46.47	47.781	29.1779	29.4637	17.0194	16.6771	9.49522	8.92801	5.35015	4.62756
105.84	68.2325	69.3325	46.4978	47.781	29.2047	29.4637	17.0182	16.6771	9.50393	8.92801	5.34903	4.62756
106.84	68.2795	69.3325	46.5351	47.781	29.2082	29.4637	17.0321	16.6771	9.50655	8.92801	5.34984	4.62756
107.84	68.3306	69.3325	46.5945	47.781	29.2189	29.4637	17.0486	16.6771	9.52237	8.92801	5.34989	4.62756
108.84	68.4205	69.3325	46.6328	47.781	29.2356	29.4637	17.0581	16.6771	9.53334	8.92801	5.3457	4.62756
109.84	68.4857	69.3325	46.6499	47.781	29.2567	29.4637	17.0879	16.6771	9.55323	8.92801	5.34606	4.62756
110.84	68.5607	69.3325	46.6536	47.781	29.2715	29.4637	17.0858	16.6771	9.55778	8.92801	5.34084	4.62756
111.84	68.6045	69.3325	46.6441	47.781	29.2726	29.4637	17.0626	16.6771	9.54842	8.92801	5.32164	4.62756
112.84	68.5981	69.3325	46.6371	47.781	29.2535	29.4637	17.0369	16.6771	9.53831	8.92801	5.30965	4.62756
113.84	68.6474	69.3325	46.6149	47.781	29.2304	29.4637	17.0201	16.6771	9.53905	8.92801	5.30218	4.62756
114.84	68.6719	69.3325	46.5957	47.781	29.1963	29.4637	16.9659	16.6771	9.52661	8.92801	5.28857	4.62756
115.84	68.6813	69.3325	46.6353	47.781	29.2123	29.4637	16.9747	16.6771	9.51717	8.92801	5.28882	4.62756
116.84	68.7447	69.3325	46.6478	47.781	29.2109	29.4637	16.9879	16.6771	9.49015	8.92801	5.26626	4.62756
117.84	68.8485	69.3325	46.6662	47.781	29.169	29.4637	17.0009	16.6771	9.44353	8.92801	5.27229	4.62756
118.84	68.8725	69.3325	47.6764	47.781	27.9929	29.4637	15.8383	16.6771	8.2562	8.92801	4.48965	4.62756
119.84	74.3149	69.3325	41.2082	41.5243	30.1331	27.347	17.4055	14.8148	10.0592	7.93106	5.88564	4.02167
120.84	53.8703	57.6686	31.9925	33.3483	21.1122	21.9625	12.1903	11.8979	6.83581	6.36951	3.88871	3.22985
121.84	44.0909	46.3136	25.3565	26.7822	17.6276	17.6383	10.1847	9.55528	5.80557	5.11542	3.41809	2.59393
122.84	34.1984	37.1945	20.0979	21.5089	14.1363	14.1654	8.1809	7.67394	4.77847	4.10825	2.84191	2.08321
123.84	26.4897	29.871	16.0137	17.2739	11.3252	11.3764	6.74203	6.16301	3.98487	3.29937	2.42129	1.67305
124.84	20.4673	23.9895	12.8758	13.8728	9.18953	9.13646	5.57714	4.94958	3.38512	2.64976	2.10568	1.34364
125.84	15.7727	19.2662	10.2917	11.1414	7.5589	7.33758	4.64464	3.97506	2.85882	2.12805	1.80321	1.0791
126.84	11.9941	15.4728	8.20318	8.94775	6.12085	5.89288	3.9598	3.19241	2.46718	1.70906	1.56899	0.866633
127.84	8.9725	12.4263	6.52684	7.18602	5.05657	4.73263	3.31639	2.56386	2.07942	1.37257	1.41482	0.695993
128.84	6.58062	9.97968	5.19823	5.77116	4.16494	3.80083	2.7765	2.05906	1.83665	1.10232	1.22893	0.558952
129.84	4.6514	8.01478	4.13819	4.63488	3.42599	3.05248	2.3629	1.65366	1.55307	0.885288	1.10887	0.448894
130.84	3.09343	6.43674	3.31574	3.72232	2.85943	2.45148	2.09036	1.32807	1.41987	0.710975	1.05926	0.360506
131.84	1.84265	5.16941	2.5471	2.98943	2.37787	1.96881	1.8268	1.06659	1.30761	0.570984	0.938948	0.289523
132.84	0.756319	4.15161	1.88965	2.40085	1.95469	1.58117	1.61702	0.856588	1.16903	0.458557	0.85568	0.232516
133.84	-0.0820408	3.3342	1.3753	1.92815	1.65326	1.26986	1.3743	0.687925	1.04315	0.368267	0.819965	0.186733
134.84	-0.743679	2.67773	0.961803	1.54851	1.37754	1.01984	1.19653	0.552472	0.909981	0.295755	0.761478	0.149965
135.84	-1.35204	2.15051	0.666778	1.24363	1.09682	0.819043	1.0656	0.44369	0.833214	0.237521	0.740418	0.120437
136.84	-1.80782	1.7271	0.377811	0.998772	0.88071	0.657773	0.926277	0.356328	0.793716	0.190753	0.707557	0.096723
137.84	-2.21095	1.38705	0.160426	0.802125	0.708443	0.528257	0.854908	0.286167	0.799575	0.153193	0.675212	0.0776782
138.84	-2.52188	1.11396	-0.0742996	0.644186	0.587895	0.424243	0.742135	0.22982	0.793716	0.12303	0.694354	0.0623834
139.84	-2.78172	0.894633	-0.294456	0.517346	0.464226	0.340709	0.679557	0.184569	0.74528	0.0988051	0.680681	0.0501001
140.84	-3.05602	0.718479	-0.437667	0.41548	0.351382	0.273624	0.619847	0.148227	0.673465	0.0793503	0.61629	0.0402354
141.84	-3.25431	0.57701	-0.512267	0.333672	0.296489	0.219747	0.567134	0.119041	0.649183	0.0637262	0.582635	0.032313
142.84	-3.35563	0.463397	-0.578292	0.267972	0.252082	0.176479	0.551486	0.0956019	0.650495	0.0511785	0.592149	0.0259506
143.84	-3.48165	0.372154	-0.713621	0.215208	0.164366	0.14173	0.499722	0.0767778	0.615155	0.0411015	0.56501	0.0208409
144.84	-3.65649	0.298877	-0.827247	0.172834	0.0859587	0.113823	0.404472	0.0616603	0.5922	0.0330086	0.54518	0.0167373
145.84	-3.72985	0.240028	-0.928196	0.138803	-0.00246215	0.0914116	0.341611	0.0495193	0.560292	0.0265092	0.53312	0.0134417
146.84	-3.83407	0.192766	-1.0011	0.111472	-0.0185382	0.0734126	0.346565	0.039769	0.519015	0.0212895	0.532229	0.0107951
147.84	-3.92282	0.15481	-1.07441	0.0895234	-0.0783195	0.0589576	0.320871	0.0319384	0.455374	0.0170976	0.514917	0.00866951
148.84	-4.04829	0.124328	-1.0861	0.0718962	-0.11057	0.0473489	0.314847	0.0256498	0.449951	0.0137311	0.474807	0.00696248
149.84	-4.13337	0.099848	-1.14289	0.0577399	-0.152961	0.0380259	0.291822	0.0205993	0.416684	0.0110274	0.426698	0.00559156
150.84	-4.18094	0.0801879	-1.20164	0.0463709	-0.216556	0.0305386	0.252528	0.0165433	0.388796	0.00885613	0.426619	0.00449058
151.84	-4.20376	0.0643989	-1.24918	0.0372404	-0.283195	0.0245255	0.206003	0.0132859	0.370279	0.00711235	0.413416	0.00360639
152.84	-4.22009	0.0517187	-1.27809	0.0299078	-0.310929	0.0196964	0.17241	0.0106699	0.345668	0.00571193	0.4374	0.00289629
153.84	-4.22985	0.0415353	-1.29801	0.0240189	-0.317647	0.0158182	0.16108	0.00856901	0.337467	0.00458725	0.430995	0.00232601
154.84	-4.24633	0.033357	-1.32384	0.0192896	-0.300806	0.0127036	0.144767	0.00688177	0.330263	0.00368402	0.407465	0.00186802
155.84	-4.27438	0.026789	-1.33081	0.0154915	-0.297698	0.0102023	0.15329	0.00552675	0.341778	0.00295863	0.395932	0.0015002
156.84	-4.28884	0.0215142	-1.34637	0.0124412	-0.295851	0.00819343	0.160922	0.00443853	0.312232	0.00237608	0.376464	0.00120481
157.84	-4.27555	0.0172781	-1.35547	0.00999152	-0.303276	0.00658014	0.172682	0.00356458	0.29395	0.00190823	0.364587	0.000967586
158.84	-4.2722	0.013876	-1.39126	0.00802419	-0.327601	0.00528451	0.123362	0.00286272	0.279013	0.0015325	0.34168	0.000777068
159.84	-4.2954	0.0111438	-1.41148	0.00644423	-0.34082	0.00424399	0.114657	0.00229905	0.253184	0.00123075	0.333591	0.000624063
160.84	-4.30305	0.0089496	-1.41415	0.00517536	-0.367681	0.00340835	0.109924	0.00184636	0.261823	0.000988414	0.322618	0.000501185
161.84	-4.30563	0.00718742	-1.42086	0.00415633	-0.367649	0.00273724	0.122683	0.00148281	0.23403	0.000793795	0.32443	0.000402501
162.84	-4.27759	0.00577222	-1.44124	0.00333795	-0.403868	0.00219828	0.102081	0.00119085	0.243889	0.000637496	0.316009	0.000323249
163.84	-4.2968	0.00463567	-1.44353	0.0026807	-0.416429	0.00176544	0.087425	0.00095637	0.241355	0.000511973	0.306918	0.000259601
164.84	-4.31821	0.0037229	-1.46286	0.00215287	-0.443429	0.00141782	0.0759244	0.00076806	0.262153	0.000411166	0.305294	0.000208486
165.84	-4.32681	0.00298986	-1.49196	0.00172897	-0.464054	0.00113865	0.0616665	0.000616829	0.248014	0.000330207	0.287714	0.000167435
166.84	-4.32641	0.00240116	-1.49231	0.00138854	-0.460773	0.000914451	0.0518627	0.000495375	0.240121	0.000265189	0.284513	0.000134467
167.84	-4.3186	0.00192837	-1.4743	0.00111513	-0.451323	0.000734396	0.0687754	0.000397836	0.266685	0.000212973	0.298183	0.00010799
168.84	-4.27915	0.00154867	-1.47812	0.000895563	-0.469882	0.000589793	0.0615318	0.000319502	0.236702	0.000171039	0.277966	8.67269e-05
169.84	-4.2972	0.00124374	-1.48642	0.000719227	-0.495412	0.000473663	0.016566	0.000256592	0.236513	0.000137361	0.287462	6.96504e-05
170.84	-4.28423	0.000998846	-1.4718	0.000577611	-0.515851	0.000380398	0.0188558	0.000206069	0.251449	0.000110315	0.294357	5.59362e-05
171.84	-4.2779	0.000802173	-1.4684	0.000463879	-0.49921	0.000305498	0.00990868	0.000165494	0.254263	8.85938e-05	0.295527	4.49223e-05
172.84	-4.25766	0.000644225	-1.46113	0.000372541	-0.481869	0.000245345	0.0240498	0.000132908	0.239732	7.11497e-05	0.292325	3.60771e-05
173.84	-4.24321	0.000517377	-1.46133	0.000299188	-0.461478	0.000197037	0.0547142	0.000106738	0.25106	5.71403e-05	0.30209	2.89735e-05
174.84	-4.23001	0.000415505	-1.45875	0.000240278	-0.467261	0.00015824	0.0706506	8.57216e-05	0.234731	4.58893e-05	0.305681	2.32686e-05
175.84	-4.22688	0.000333692	-1.45875	0.000192967	-0.444602	0.000127083	0.0706506	6.8843e-05	0.231607	3.68537e-05	0.303728	1.8687e-05
176.84	-4.2304	0.000267988	-1.48461	0.000154972	-0.45476	0.00010206	0.0472126	5.52878e-05	0.207388	2.95972e-05	0.26193	1.50076e-05
177.84	-4.2272	0.000215221	-1.4936	0.000124458	-0.451242	8.19644e-05	0.0226021	4.44016e-05	0.198792	2.37695e-05	0.258415	1.20526e-05
178.84	-4.2218	0.000172844	-1.51309	9.99519e-05	-0.461164	6.58256e-05	0.00256324	3.56589e-05	0.196372	1.90893e-05	0.237636	9.67941e-06
179.84	-4.22024	0.000138811	-1.51047	8.02714e-05	-0.479212	5.28645e-05	0.0149491	2.86377e-05	0.209574	1.53306e-05	0.240996	7.77353e-06
180.84	-4.23501	0.000111479	-1.50962	6.44659e-05	-0.470963	4.24555e-05	0.0162511	2.29989e-05	0.231357	1.2312e-05	0.244495	6.24292e-06
181.84	-4.23188	8.95289e-05	-1.4889	5.17726e-05	-0.471914	3.4096e-05	0.0148132	1.84704e-05	0.239357	9.88777e-06	0.262337	5.01369e-06
182.84	-4.20384	7.19006e-05	-1.47196	4.15785e-05	-0.454916	2.73825e-05	0.0226822	1.48336e-05	0.267074	7.94087e-06	0.278964	4.02649e-06
183.84	-4.15844	5.77434e-05	-1.48376	3.33917e-05	-0.453463	2.19909e-05	0.0243773	1.19129e-05	0.257294	6.37731e-06	0.270432	3.23368e-06
184.84	-4.15024	4.63737e-05	-1.49328	2.68169e-05	-0.467539	1.76609e-05	-0.0058105	9.56721e-06	0.229122	5.12161e-06	0.25898	2.59696e-06
185.84	-4.14837	3.72427e-05	-1.48715	2.15366e-05	-0.477885	1.41834e-05	-0.00962234	7.68343e-06	0.225668	4.11317e-06	0.256853	2.08562e-06
186.84	-4.15344	2.99096e-05	-1.50309	1.72961e-05	-0.501635	1.13907e-05	-0.0150928	6.17056e-06	0.191763	3.30328e-06	0.219744	1.67496e-06
187.84	-4.16821	2.40204e-05	-1.52138	1.38905e-05	-0.540336	9.14787e-06	-0.0308182	4.95557e-06	0.171669	2.65287e-06	0.202774	1.34516e-06
188.84	-4.16313	1.92908e-05	-1.51613	1.11554e-05	-0.548789	7.34665e-06	-0.0266328	3.97982e-06	0.15756	2.13052e-06	0.21523	1.0803e-06
189.84	-4.15188	1.54924e-05	-1.51676	8.95892e-06	-0.559836	5.9001e-06	-0.0112627	3.19619e-06	0.137075	1.71102e-06	0.195917	8.67588e-07
190.84	-4.1472	1.2442e-05	-1.51423	7.19491e-06	-0.547369	4.73837e-06	0.00508094	2.56686e-06	0.135185	1.37412e-06	0.213947	6.9676e-07
191.84	-4.13071	9.99213e-06	-1.51007	5.77823e-06	-0.536288	3.80538e-06	0.0255198	2.06145e-06	0.150138	1.10355e-06	0.230464	5.59567e-07
192.84	-4.1093	8.02468e-06	-1.48978	4.64049e-06	-0.515494	3.0561e-06	0.0260186	1.65555e-06	0.162607	8.86263e-07	0.233167	4.49389e-07
193.84	-4.09633	6.44462e-06	-1.49172	3.72678e-06	-0.53129	2.45435e-06	0.0184858	1.32957e-06	0.162247	7.11758e-07	0.21484	3.60904e-07
194.84	-4.08946	5.17567e-06	-1.4754	2.99298e-06	-0.51612	1.97109e-06	0.00758219	1.06778e-06	0.180261	5.71613e-07	0.213323	2.89842e-07
195.84	-4.06704	4.15658e-06	-1.46765	2.40366e-06	-0.508791	1.58298e-06	0.0203629	8.57531e-07	0.182247	4.59062e-07	0.233356	2.32772e-07
196.84	-4.03743	3.33815e-06	-1.45634	1.93038e-06	-0.503228	1.27129e-06	0.0208619	6.88683e-07	0.187296	3.68673e-07	0.236685	1.86939e-07
197.84	-4.0261	2.68087e-06	-1.45519	1.55029e-06	-0.496054	1.02098e-06	0.0268853	5.53081e-07	0.184513	2.96081e-07	0.245308	1.50131e-07
198.84	-4.00813	2.153e-06	-1.44267	1.24503e-06	-0.494713	8.19945e-07	0.0368776	4.44179e-07	0.196278	2.37782e-07	0.247307	1.2057e-07
199.84	-3.99368	1.72908e-06	-1.41866	9.99887e-07	-0.485507	6.58498e-07	0.0434871	3.5672e-07	0.194278	1.90963e-07	0.256637	9.68297e-08
200.84	-3.96907	1.38862e-06	-1.41224	8.03009e-07	-0.470648	5.28839e-07	0.0340254	2.86482e-07	0.205499	1.53362e-07	0.248323	7.77639e-08
201.84	-3.95571	1.1152e-06	-1.39726	6.44896e-07	-0.467538	4.24711e-07	0.0454414	2.30074e-07	0.210374	1.23165e-07	0.244996	6.24522e-08
202.84	-3.93907	8.95618e-07	-1.39544	5.17916e-07	-0.454241	3.41085e-07	0.0476968	1.84772e-07	0.219952	9.8914e-08	0.243244	5.01553e-08
203.84	-3.92173	7.19271e-07	-1.39274	4.15938e-07	-0.439835	2.73925e-07	0.0320559	1.4839e-07	0.21528	7.94378e-08	0.236932	4.02797e-08
204.84	-3.91509	5.77646e-07	-1.40203	3.3404e-07	-0.461602	2.19989e-07	0.0198944	1.19172e-07	0.206075	6.37965e-08	0.229059	3.23486e-08
205.84	-3.89649	4.63907e-07	-1.4049	2.68267e-07	-0.457682	1.76673e-07	0.00676131	9.57073e-08	0.213387	5.1235e-08	0.223713	2.59792e-08
206.84	-3.89251	3.72564e-07	-1.40258	2.15445e-07	-0.459414	1.41886e-07	0.019424	7.68625e-08	0.210449	4.11468e-08	0.225543	2.08639e-08
207.84	-3.87258	2.99206e-07	-1.41208	1.73024e-07	-0.453619	1.13949e-07	0.0212924	6.17282e-08	0.205809	3.3045e-08	0.227228	1.67558e-08
208.84	-3.86438	2.40292e-07	-1.41527	1.38956e-07	-0.452384	9.15123e-08	0.024698	4.95739e-08	0.205762	2.65384e-08	0.215776	1.34566e-08
209.84	-3.86133	1.92979e-07	-1.42111	1.11595e-07	-0.447135	7.34935e-08	0.0252359	3.98128e-08	0.200498	2.1313e-08	0.209261	1.0807e-08
210.84	-3.86633	1.54981e-07	-1.41426	8.96221e-08	-0.462727	5.90226e-08	-0.00212431	3.19737e-08	0.199887	1.71165e-08	0.216229	8.67907e-09
211.84	-3.8643	1.24465e-07	-1.41668	7.19755e-08	-0.470975	4.74011e-08	-0.00912929	2.5678e-08	0.189669	1.37462e-08	0.20476	6.97016e-09
212.84	-3.85626	9.99581e-08	-1.41224	5.78035e-08	-0.47096	3.80678e-08	-0.0280845	2.0622e-08	0.166045	1.10396e-08	0.181212	5.59773e-09
213.84	-3.83657	8.02763e-08	-1.42325	4.6422e-08	-0.470852	3.05722e-08	-0.0403244	1.65615e-08	0.156918	8.86589e-09	0.183731	4.49554e-09
214.84	-3.82844	6.44699e-08	-1.4241	3.72815e-08	-0.473712	2.45526e-08	-0.0353792	1.33006e-08	0.16123	7.1202e-09	0.194605	3.61036e-09
215.84	-3.82344	5.17757e-08	-1.41384	2.99408e-08	-0.464167	1.97182e-08	-0.0298405	1.06817e-08	0.138386	5.71823e-09	0.197308	2.89948e-09
216.84	-3.81243	4.15811e-08	-1.39453	2.40454e-08	-0.46312	1.58356e-08	-0.0058341	8.57846e-09	0.157702	4.59231e-09	0.195837	2.32857e-09
217.84	-3.78469	3.33938e-08	-1.39242	1.93109e-08	-0.452727	1.27176e-08	0.00307369	6.88936e-09	0.153171	3.68808e-09	0.206073	1.87008e-09
218.84	-3.7811	2.68185e-08	-1.37546	1.55086e-08	-0.447148	1.02135e-08	0.0187995	5.53284e-09	0.152168	2.9619e-09	0.214527	1.50186e-09
219.84	-3.7629	2.15379e-08	-1.36497	1.24549e-08	-0.451038	8.20246e-09	0.014493	4.44343e-09	0.12542	2.3787e-09	0.205746	1.20614e-09
220.84	-3.74485	1.72971e-08	-1.35274	1.00025e-08	-0.453431	6.58739e-09	0.0194016	3.56851e-09	0.132936	1.91033e-09	0.205058	9.68653e-10
221.84	-3.72571	1.38913e-08	-1.3418	8.03304e-09	-0.45882	5.29034e-09	0.031275	2.86587e-09	0.133872	1.53419e-09	0.207949	7.77925e-10
222.84	-3.71399	1.11561e-08	-1.32765	6.45133e-09	-0.461291	4.24867e-09	0.0258312	2.30158e-09	0.130998	1.23211e-09	0.211324	6.24751e-10
223.84	-3.69602	8.95947e-09	-1.33454	5.18106e-09	-0.467368	3.4121e-09	0.0248466	1.8484e-09	0.138467	9.89504e-10	0.199182	5.01737e-10
224.84	-3.70423	7.19535e-09	-1.32278	4.16091e-09	-0.477257	2.74026e-09	0.020767	1.48445e-09	0.146529	7.9467e-10	0.190917	4.02945e-10
225.84	-3.6847	5.77858e-09	-1.35059	3.34163e-09	-0.493976	2.2007e-09	0.0162375	1.19216e-09	0.131139	6.38199e-10	0.170447	3.23605e-10
226.84	-3.68938	4.64078e-09	-1.35621	2.68366e-09	-0.500587	1.76738e-09	0.0119634	9.57424e-10	0.135763	5.12538e-10	0.155621	2.59887e-10
227.84	-3.68477	3.72701e-09	-1.35153	2.15525e-09	-0.507526	1.41939e-09	0.0118387	7.68907e-10	0.125732	4.11619e-10	0.147462	2.08715e-10
228.84	-3.66516	2.99316e-09	-1.35176	1.73088e-09	-0.503429	1.13991e-09	0.00943899	6.17509e-10	0.126998	3.30571e-10	0.148728	1.67619e-10
229.84	-3.65071	2.40381e-09	-1.36012	1.39007e-09	-0.499603	9.1546e-10	0.00170636	4.95922e-10	0.117232	2.65482e-10	0.147088	1.34615e-10
230.84	-3.62767	1.9305e-09	-1.35418	1.11636e-09	-0.48382	7.35205e-10	-0.0012629	3.98274e-10	0.115904	2.13208e-10	0.153652	1.08109e-10
231.84	-3.60454	1.55038e-09	-1.36277	8.96551e-10	-0.47254	5.90443e-10	-0.00256896	3.19854e-10	0.11467	1.71227e-10	0.163824	8.68226e-11
232.84	-3.58477	1.24511e-09	-1.37048	7.2002e-10	-0.46104	4.74185e-10	-0.0240617	2.56875e-10	0.117295	1.37513e-10	0.168324	6.97272e-11
233.84	-3.59329	9.99948e-10	-1.37203	5.78248e-10	-0.466087	3.80818e-10	-0.0266142	2.06296e-10	0.106217	1.10436e-10	0.168965	5.59979e-11
234.84	-3.60149	8.03058e-10	-1.34508	4.64391e-10	-0.46757	3.05835e-10	-0.026536	1.65676e-10	0.107388	8.86915e-11	0.166621	4.49719e-11
235.84	-3.59954	6.44936e-10	-1.36336	3.72952e-10	-0.465071	2.45616e-10	-0.023802	1.33055e-10	0.0889509	7.12281e-11	0.157949	3.61169e-11
236.84	-3.6093	5.17948e-10	-1.35192	2.99518e-10	-0.479369	1.97254e-10	-0.00727987	1.06856e-10	0.1102	5.72033e-11	0.179197	2.90055e-11
237.84	-3.58313	4.15964e-10	-1.32746	2.40543e-10	-0.474914	1.58415e-10	0.027251	8.58161e-11	0.132623	4.59399e-11	0.203182	2.32943e-11
238.84	-3.55188	3.3406e-10	-1.30157	1.9318e-10	-0.438587	1.27223e-10	0.0714309	6.89189e-11	0.139107	3.68944e-11	0.242481	1.87076e-11
239.84	-3.54563	2.68284e-10	-1.31224	1.55143e-10	-0.425682	1.02173e-10	0.0461121	5.53488e-11	0.137511	2.96298e-11	0.25854	1.50241e-11
240.84	-3.49641	2.15459e-10

## Sheet: biotin-C3d ISG65L2N188A etc.
Cycle: 23 ISG65L2ala 10000 nM_X	Cycle: 23 ISG65L2ala 10000 nM_Y	Fitted Cycle: 23 ISG65L2ala 10_Y	Cycle: 24 ISG65L2ala 5000 nM_Y	Fitted Cycle: 24 ISG65L2ala 50_Y	Cycle: 25 ISG65L2ala 2500 nM_Y	Fitted Cycle: 25 ISG65L2ala 25_Y	Cycle: 26 ISG65L2ala 1250 nM_Y	Fitted Cycle: 26 ISG65L2ala 12_Y	Cycle: 27 ISG65L2ala 625 nM_Y	Fitted Cycle: 27 ISG65L2ala 62_Y	Cycle: 28 ISG65L2ala 312.5 nM_Y	Fitted Cycle: 28 ISG65L2ala 31_Y
-60.08	0.0877686	0	-0.061157	0	0.00585914	0	0.015503	0	0.0190428	0	-0.0277101	0
-59.08	0.0975342	0	-0.061157	0	-0.0136721	0	0.00573742	0	0.00927722	0	-0.0296632	0
-58.08	0.0975342	0	-0.0494382	0	-0.0253909	0	0.00573742	0	0.00927722	0	-0.010132	0
-57.08	0.0955811	0	-0.029907	0	-0.0234377	0	0.00573742	0	0.00927722	0	-0.010132	0
-56.08	0.0858154	0	-0.0406494	0	-0.0292969	0	-0.00109863	0	-0.000488281	0	-0.02771	0
-55.08	0.0760498	0	-0.0406494	0	-0.0488281	0	-0.0108643	0	-0.0102539	0	-0.0472412	0
-54.08	0.0643311	0	-0.0592043	0	-0.0566404	0	-0.0294191	0	-0.0161132	0	-0.0531005	0
-53.08	0.0252686	0	-0.0787356	0	-0.0566404	0	-0.0489503	0	-0.0258788	0	-0.0745848	0
-52.08	0.00769043	0	-0.0799067	0	-0.0574224	0	-0.0466062	0	-0.0223635	0	-0.0593508	0
-51.08	0.00964355	0	-0.0787351	0	-0.0332034	0	-0.0430907	0	-0.010254	0	-0.0667726	0
-50.08	0.00769043	0	-0.0689695	0	-0.0332034	0	-0.0528563	0	-0.010254	0	-0.057007	0
-49.08	0.00769043	0	-0.0777588	0	-0.0390625	0	-0.0596924	0	-0.0180664	0	-0.0648193	0
-48.08	0.00769043	0	-0.0875244	0	-0.0488281	0	-0.0596924	0	-0.0180664	0	-0.0843506	0
-47.08	-0.0020752	0	-0.0885007	0	-0.0527346	0	-0.0528563	0	-0.0200197	0	-0.0863038	0
-46.08	-0.0020752	0	-0.0787351	0	-0.0332034	0	-0.0528563	0	-0.0004884	0	-0.0765382	0
-45.08	-0.0020752	0	-0.0894775	0	-0.0390625	0	-0.0401611	0	-0.00830078	0	-0.0863037	0
-44.08	-0.0020752	0	-0.0806882	0	-0.0332034	0	-0.0430907	0	-0.010254	0	-0.0784913	0
-43.08	0.0057373	0	-0.0718989	0	-0.0175786	0	-0.0382078	0	0.00732398	0	-0.0706789	0
-42.08	0.0155029	0	-0.0506098	0	-0.0164068	0	-0.00559056	0	0.0186521	0	-0.0495852	0
-41.08	0.0272217	0	-0.0494382	0	-0.011719	0	-0.00207508	0	0.020996	0	-0.0277101	0
-40.08	0.0487061	0	-0.00744629	0	-0.0273438	0	0.000854492	0	0.0131836	0	-0.0355225	0
-39.08	0.111206	0	0.0258791	0	0.050781	0	0.0487062	0	0.0405272	0	0.00353992	0
-38.08	0.13855	0	0.101195	0	0.0570078	0	0.063354	0	0.068604	0	0.0246587	0
-37.08	0.184692	0	0.197337	0	0.114553	0	0.115209	0	0.10464	0	0.0414072	0
-36.08	0.204346	0	0.179978	0	0.170241	0	0.173607	0	0.155494	0	0.0627208	0
-35.08	0.125977	0	0.0196998	0	0.109451	0	0.108422	0	0.0879894	0	0.00180781	0
-34.08	-0.0286865	0	-0.0241333	0	-0.0142578	0	0.0157349	0	-0.00639647	0	-0.0614502	0
-33.08	-0.10376	0	-0.0359358	0	-0.0502458	0	0.0109627	0	-0.0186532	0	-0.0641854	0
-32.08	-0.0725098	0	-0.016259	0	-0.0610116	0	0.0248295	0	-0.0217777	0	-0.0686527	0
-31.08	-0.0661621	0	-0.0104359	0	-0.0557873	0	0.0277715	0	-0.0142828	0	-0.0449224	0
-30.08	-0.0512695	0	-0.0246332	0	-0.0533697	0	0.00837433	0	-0.0176517	0	-0.054639	0
-29.08	-0.0560303	0	-0.0251092	0	-0.0485603	0	0.0135379	0	-0.0287357	0	-0.0591312	0
-28.08	-0.0482178	0	-0.000828922	0	-0.0169933	0	0.0257086	0	-0.017774	0	-0.03523	0
-27.08	-0.0235596	0	0.00655615	0	-0.0154063	0	0.0282109	0	0.00175732	0	-0.00397998	0
-26.08	-0.00524902	0	0.00081861	0	-0.0072273	0	0.0224735	0	-0.00312537	0	-0.004224	0
-25.08	0.00585938	0	0.0101323	0	0.00866652	0	0.00476098	0	-0.0122073	0	-0.000366449	0
-24.08	0.0144043	0	0.011524	0	0.0113032	0	-0.00559056	0	-0.0141848	0	0.0107175	0
-23.08	0.0241699	0	-0.00622511	0	0.00549269	0	-0.0275877	0	-0.020386	0	0.0113523	0
-22.08	0.0355225	0	-0.0225703	0	0.00602973	0	-0.0158322	0	-0.0292727	0	0.0141843	0
-21.08	0.0241699	0	-0.00833678	0	0.00278258	0	-0.00865448	0	-0.0526859	0	0.00993621	0
-20.08	0.0109863	0	-0.00578538	0	-0.01399	0	-0.0169918	0	-0.0440434	0	0.0122311	0
-19.08	-0.0137939	0	-0.0246577	0	-0.0223393	0	-0.0233152	0	-0.0595706	0	-0.00500512	0
-18.08	-0.0430908	0	-0.0227164	0	-0.0332528	0	-0.0129757	0	-0.0824223	0	-0.00661662	0
-17.08	-0.0595703	0	-0.0113151	0	-0.0473397	0	-0.0158809	0	-0.0818363	0	-0.0181156	0
-16.08	-0.0593262	0	-0.0135125	0	-0.0492926	0	-0.0266232	0	-0.0851322	0	-0.0227542	0
-15.08	-0.0638428	0	-0.0153801	0	-0.0424812	0	-0.0294186	0	-0.0747074	0	-0.0234379	0
-14.08	-0.0528564	0	-0.0190665	0	-0.0379403	0	-0.0258297	0	-0.0608403	0	-0.0294682	0
-13.08	-0.0379639	0	-0.02246	0	-0.0440683	0	-0.0170894	0	-0.0446782	0	-0.0216069	0
-12.08	-0.0228271	0	-0.0128164	0	-0.0151377	0	-0.0108638	0	-0.0173345	0	-0.0316167	0
-11.08	-0.00354004	0	-0.00833641	0	0.00681053	0	0.0113652	0	-0.00654346	0	-0.0142339	0
-10.08	0.019043	0	-0.0122673	0	0.0124504	0	0.0130009	0	0.0181881	0	-0.00903358	0
-9.08002	0.0290527	0	0.00393182	0	0.0108387	0	0.0127691	0	0.039599	0	0.0107904	0
-8.08002	0.0355225	0	0.00608009	0	0.011498	0	0.0160405	0	0.042187	0	0.0164302	0
-7.08002	0.0384521	0	0.0268563	0	0.0114738	0	-0.0124508	0	0.0555416	0	0.0201412	0
-6.08002	0.0406494	0	0.0296881	0	-0.0169927	0	-0.0452146	0	0.0574216	0	0.028613	0
-5.08002	0.0192871	0	0.0223655	0	-0.0229759	0	-0.0348378	0	0.0713368	0	0.0476551	0
-4.08002	0.019043	0	0.00388458	0	-0.0204861	0	-0.0398668	0	0.0508531	0	0.00715196	0
-3.08002	0.0272217	0	-0.0723025	0	-0.0846189	0	-0.141956	0	-0.0359618	0	-0.0255858	0
-2.08002	0.0955811	0	-0.00248311	0	0.0602834	0	0.0201513	0	0.00774181	0	0.0918483	0
-1.08002	0.130737	0	-0.325223	0	1.37442	0	1.13805	0	0.932509	0	0.362929	0
-0.0800171	-2.94397	0	8.17769	16.6006	-0.537433	5.5403	0.0325713	3.29986	-0.238748	1.90985	0.53298	0.957321
0.919983	23.436	35.0123	29.7143	32.6995	13.8941	14.7319	7.80531	7.95	4.23387	4.23578	2.3684	2.1303
1.91998	55.8464	61.8099	44.1573	45.2028	23.1339	22.2876	12.7773	11.8826	6.87115	6.23095	3.74444	3.14363
2.91998	75.6711	80.3885	54.3709	54.9137	30.4236	28.4987	16.983	15.2085	9.09749	7.94239	4.93367	4.01906
3.91998	88.2837	93.269	61.6073	62.4558	35.9351	33.6044	20.185	18.0212	10.8587	9.41045	5.83641	4.77534
4.91998	96.736	102.199	66.8469	68.3135	40.1305	37.8015	22.8753	20.3998	12.3526	10.6697	6.63641	5.42869
5.91998	102.689	108.39	70.8249	72.8629	43.4273	41.2516	24.91	22.4115	13.5123	11.7499	7.26338	5.99311
6.91998	106.96	112.682	73.7033	76.3962	45.9132	44.0878	26.5668	24.1128	14.5626	12.6765	7.85308	6.48073
7.91998	110.126	115.658	76.032	79.1405	47.9466	46.4191	27.9815	25.5515	15.4692	13.4714	8.3083	6.90197
8.91998	112.547	117.721	77.8963	81.2718	49.5858	48.3356	29.1537	26.7683	16.1518	14.1532	8.70445	7.26589
9.91998	114.415	119.152	79.3593	82.9271	50.8177	49.911	30.117	27.7973	16.7223	14.738	9.02056	7.58028
10.92	115.921	120.143	80.4768	84.2128	51.891	51.2061	30.8464	28.6676	17.2168	15.2397	9.34331	7.85189
11.92	117.218	120.831	81.4404	85.2113	52.7301	52.2706	31.4796	29.4036	17.709	15.67	9.68323	8.08652
12.92	118.195	121.307	82.1809	85.9868	53.514	53.1457	32.0348	30.026	18.0298	16.0391	9.85364	8.28923
13.92	118.869	121.638	82.8056	86.5891	54.0735	53.8651	32.4338	30.5523	18.257	16.3558	9.9897	8.46435
14.92	119.531	121.867	83.3577	87.0568	54.5092	54.4564	32.7852	30.9975	18.5631	16.6274	10.2125	8.61563
15.92	120.106	122.026	83.8077	87.4201	55.0293	54.9425	33.1729	31.374	18.7736	16.8604	10.3855	8.74632
16.92	120.607	122.136	84.1832	87.7023	55.3741	55.3421	33.4391	31.6924	18.9409	17.0602	10.4938	8.85923
17.92	120.991	122.212	84.5115	87.9215	55.6382	55.6706	33.6986	31.9616	19.1311	17.2317	10.6138	8.95677
18.92	121.356	122.265	84.7719	88.0917	55.8733	55.9406	33.8532	32.1893	19.315	17.3787	10.701	9.04103
19.92	121.612	122.302	84.985	88.2239	56.047	56.1626	34.0425	32.3819	19.4449	17.5049	10.7755	9.11383
20.92	121.841	122.327	85.2121	88.3266	56.2961	56.345	34.1826	32.5448	19.4938	17.6131	10.8782	9.17671
21.92	122.031	122.345	85.3492	88.4063	56.4447	56.495	34.3198	32.6825	19.608	17.7059	10.9402	9.23104
22.92	122.191	122.357	85.4423	88.4682	56.5797	56.6183	34.3925	32.799	19.6844	17.7855	10.9971	9.27798
23.92	122.318	122.366	85.6097	88.5163	56.6891	56.7197	34.5251	32.8975	19.6817	17.8538	11.0076	9.31852
24.92	122.41	122.371	85.6661	88.5537	56.7681	56.803	34.5779	32.9808	19.8073	17.9124	11.04	9.35355
25.92	122.521	122.376	85.7622	88.5827	56.8106	56.8715	34.637	33.0513	19.8521	17.9626	11.0538	9.38381
26.92	122.575	122.378	85.8154	88.6052	56.8948	56.9278	34.6726	33.1109	19.8151	18.0057	11.0672	9.40996
27.92	122.633	122.38	85.8702	88.6227	56.9533	56.9741	34.6964	33.1612	19.8852	18.0427	11.0936	9.43254
28.92	122.665	122.382	85.9377	88.6363	57	57.0121	34.7739	33.2039	19.938	18.0744	11.1183	9.45205
29.92	122.674	122.383	85.9054	88.6469	57.0543	57.0434	34.7948	33.2399	19.9749	18.1016	11.1586	9.4689
30.92	122.741	122.383	85.9848	88.6551	57.0855	57.0691	34.7905	33.2704	19.9701	18.1249	11.1846	9.48347
31.92	122.744	122.384	86.0399	88.6614	57.0839	57.0902	34.8012	33.2961	19.9888	18.145	11.2052	9.49605
32.92	122.739	122.384	86.0625	88.6664	57.1274	57.1076	34.8432	33.3179	20.0375	18.1621	11.2635	9.50691
33.92	122.747	122.384	86.0439	88.6702	57.178	57.1219	34.8746	33.3364	20.048	18.1769	11.2825	9.5163
34.92	122.707	122.384	86.0734	88.6732	57.1717	57.1336	34.8741	33.352	20.0401	18.1895	11.2335	9.52441
35.92	122.741	122.385	86.1334	88.6755	57.1827	57.1433	34.8847	33.3652	20.0232	18.2003	11.2151	9.53142
36.92	122.759	122.385	86.1236	88.6773	57.2159	57.1512	34.9027	33.3763	20.0554	18.2096	11.2274	9.53747
37.92	122.819	122.385	86.1413	88.6787	57.259	57.1577	34.935	33.3857	20.1	18.2176	11.256	9.5427
38.92	122.888	122.385	86.1428	88.6798	57.2841	57.1631	34.957	33.3937	20.1051	18.2245	11.2889	9.54722
39.92	122.921	122.385	86.1499	88.6806	57.2799	57.1675	34.9869	33.4005	20.0776	18.2303	11.304	9.55112
40.92	122.886	122.385	86.2258	88.6813	57.2632	57.1711	35.0185	33.4062	20.0597	18.2354	11.3106	9.55449
41.92	122.901	122.385	86.2374	88.6818	57.2547	57.1741	35.0455	33.411	20.0965	18.2397	11.3107	9.5574
42.92	122.965	122.385	86.2555	88.6822	57.299	57.1765	35.0799	33.4151	20.1436	18.2434	11.3308	9.55992
43.92	122.944	122.385	86.2752	88.6825	57.3252	57.1785	35.0976	33.4185	20.179	18.2466	11.3428	9.56209
44.92	122.993	122.385	86.2791	88.6827	57.3104	57.1802	35.0971	33.4214	20.1876	18.2493	11.3498	9.56397
45.92	123.029	122.385	86.3129	88.6829	57.2928	57.1816	35.0721	33.4239	20.1667	18.2516	11.3586	9.56559
46.92	122.999	122.385	86.3002	88.6831	57.2585	57.1827	35.0439	33.426	20.1331	18.2536	11.3346	9.567
47.92	122.99	122.385	86.3346	88.6832	57.2647	57.1836	35.0431	33.4277	20.1339	18.2553	11.3532	9.56821
48.92	122.998	122.385	86.3463	88.6833	57.2649	57.1843	35.0529	33.4292	20.1323	18.2568	11.3782	9.56925
49.92	122.984	122.385	86.3774	88.6833	57.2895	57.185	35.0726	33.4305	20.1568	18.2581	11.4022	9.57016
50.92	123.005	122.385	86.4384	88.6834	57.3265	57.1855	35.0852	33.4316	20.172	18.2592	11.4162	9.57094
51.92	123.062	122.385	86.447	88.6834	57.3534	57.1859	35.0738	33.4325	20.1667	18.2601	11.4141	9.57161
52.92	123.087	122.385	86.4564	88.6835	57.354	57.1862	35.0729	33.4332	20.1598	18.2609	11.3904	9.57219
53.92	123.074	122.385	86.4755	88.6835	57.3447	57.1865	35.0828	33.4339	20.1635	18.2616	11.3761	9.5727
54.92	123.083	122.385	86.499	88.6835	57.3464	57.1868	35.0797	33.4344	20.1812	18.2622	11.4075	9.57313
55.92	123.129	122.385	86.5156	88.6835	57.3357	57.1869	35.0825	33.4349	20.1893	18.2627	11.4007	9.57351
56.92	123.173	122.385	86.5349	88.6835	57.318	57.1871	35.0811	33.4353	20.1775	18.2631	11.3968	9.57383
57.92	123.135	122.385	86.5144	88.6835	57.3057	57.1872	35.102	33.4356	20.1879	18.2635	11.4107	9.57411
58.92	123.175	122.385	86.515	88.6835	57.2917	57.1873	35.0974	33.4359	20.1774	18.2638	11.4131	9.57436
59.92	123.203	122.385	86.5222	88.6835	57.2701	57.1874	35.0806	33.4361	20.1686	18.2641	11.3946	9.57456
60.92	123.186	122.385	86.5513	88.6835	57.2716	57.1875	35.0703	33.4363	20.1881	18.2643	11.4011	9.57475
61.92	123.196	122.385	86.5632	88.6835	57.2813	57.1876	35.0751	33.4365	20.1818	18.2645	11.4144	9.5749
62.92	123.23	122.385	86.5791	88.6836	57.3043	57.1876	35.0873	33.4366	20.189	18.2647	11.4216	9.57504
63.92	123.214	122.385	86.6114	88.6836	57.2932	57.1876	35.088	33.4368	20.201	18.2648	11.4499	9.57515
64.92	123.237	122.385	86.578	88.6836	57.2598	57.1877	35.0766	33.4369	20.1665	18.2649	11.4611	9.57525
65.92	123.234	122.385	86.5658	88.6836	57.2497	57.1877	35.0432	33.4369	20.1337	18.2651	11.4564	9.57534
66.92	123.225	122.385	86.5387	88.6836	57.2566	57.1877	35.046	33.437	20.1426	18.2652	11.4225	9.57542
67.92	123.236	122.385	86.5696	88.6836	57.2193	57.1877	35.0749	33.4371	20.1735	18.2652	11.4158	9.57548
68.92	123.294	122.385	86.5734	88.6836	57.1743	57.1878	35.0863	33.4371	20.117	18.2653	11.4233	9.57554
69.92	123.353	122.385	86.5426	88.6836	57.1253	57.1878	34.9646	33.4372	20.0676	18.2654	11.3751	9.57558
70.92	123.387	122.385	86.5483	88.6836	57.0713	57.1878	34.9328	33.4372	20.0394	18.2654	11.3388	9.57563
71.92	123.42	122.385	86.6052	88.6836	57.0779	57.1878	34.9233	33.4372	20.0484	18.2655	11.3626	9.57566
72.92	123.539	122.385	86.6408	88.6836	57.0772	57.1878	34.902	33.4373	20.0486	18.2655	11.3596	9.57569
73.92	123.609	122.385	86.6609	88.6836	57.0375	57.1878	34.8615	33.4373	20.0325	18.2655	11.3565	9.57572
74.92	123.731	122.385	86.6685	88.6836	57.0002	57.1878	34.85	33.4373	20.0115	18.2655	11.3503	9.57574
75.92	123.835	122.385	86.6926	88.6836	57.0084	57.1878	34.837	33.4373	19.9827	18.2656	11.3541	9.57576
76.92	123.984	122.385	86.701	88.6836	57.0207	57.1878	34.8131	33.4373	19.9572	18.2656	11.3481	9.57578
77.92	124.077	122.385	86.7235	88.6836	57.025	57.1878	34.7734	33.4373	19.9159	18.2656	11.348	9.5758
78.92	124.172	122.385	86.7626	88.6836	57.031	57.1878	34.7385	33.4374	19.9321	18.2656	11.3197	9.57581
79.92	124.27	122.385	86.8015	88.6836	57.0114	57.1878	34.7251	33.4374	19.9583	18.2656	11.2952	9.57582
80.92	124.371	122.385	86.8532	88.6836	57.0202	57.1878	34.7422	33.4374	19.9464	18.2656	11.2933	9.57583
81.92	124.463	122.385	86.9123	88.6836	57.0271	57.1878	34.7602	33.4374	19.9188	18.2657	11.2821	9.57584
82.92	124.557	122.385	86.9665	88.6836	57.0598	57.1878	34.7696	33.4374	19.9062	18.2657	11.2907	9.57585
83.92	124.71	122.385	87.0113	88.6836	57.0844	57.1878	34.7712	33.4374	19.9041	18.2657	11.2949	9.57585
84.92	124.85	122.385	87.0278	88.6836	57.062	57.1878	34.728	33.4374	19.8951	18.2657	11.2711	9.57586
85.92	124.948	122.385	87.0821	88.6836	57.0511	57.1878	34.6978	33.4374	19.8757	18.2657	11.2507	9.57586
86.92	125.025	122.385	87.1323	88.6836	57.0529	57.1878	34.6641	33.4374	19.8607	18.2657	11.2386	9.57587
87.92	125.1	122.385	87.1737	88.6836	57.0321	57.1878	34.6346	33.4374	19.8319	18.2657	11.2164	9.57587
88.92	125.195	122.385	87.194	88.6836	57.0354	57.1878	34.6045	33.4374	19.7912	18.2657	11.205	9.57587
89.92	125.304	122.385	87.229	88.6836	57.0397	57.1878	34.5933	33.4374	19.7795	18.2657	11.1948	9.57588
90.92	125.398	122.385	87.2855	88.6836	57.0336	57.1878	34.5862	33.4374	19.7796	18.2657	11.1934	9.57588
91.92	125.492	122.385	87.3436	88.6836	57.0446	57.1878	34.606	33.4374	19.7949	18.2657	11.1908	9.57588
92.92	125.638	122.385	87.3806	88.6836	57.0601	57.1878	34.622	33.4374	19.7987	18.2657	11.1749	9.57588
93.92	125.742	122.385	87.419	88.6836	57.0783	57.1878	34.6392	33.4374	19.8069	18.2657	11.1897	9.57588
94.92	125.842	122.385	87.4325	88.6836	57.084	57.1878	34.6462	33.4374	19.8007	18.2657	11.1653	9.57588
95.92	125.896	122.385	87.4399	88.6836	57.0576	57.1878	34.6273	33.4374	19.7807	18.2657	11.1885	9.57589
96.92	125.95	122.385	87.4506	88.6836	57.0322	57.1878	34.6274	33.4374	19.7603	18.2657	11.1738	9.57589
97.92	125.985	122.385	87.4552	88.6836	57.0118	57.1878	34.6071	33.4374	19.7418	18.2657	11.1723	9.57589
98.92	126.04	122.385	87.4609	88.6836	56.993	57.1878	34.5824	33.4374	19.7129	18.2657	11.156	9.57589
99.92	126.064	122.385	87.4768	88.6836	56.9882	57.1878	34.5686	33.4374	19.6999	18.2657	11.1351	9.57589
100.92	126.121	122.385	87.488	88.6836	56.9799	57.1878	34.5486	33.4374	19.6799	18.2657	11.1053	9.57589
101.92	126.128	122.385	87.5143	88.6836	56.972	57.1878	34.534	33.4374	19.689	18.2657	11.1028	9.57589
102.92	126.163	122.385	87.52	88.6836	56.9739	57.1878	34.5087	33.4374	19.6714	18.2657	11.095	9.57589
103.92	126.196	122.385	87.5457	88.6836	56.9857	57.1878	34.503	33.4374	19.6763	18.2657	11.0933	9.57589
104.92	126.234	122.385	87.5551	88.6836	56.9891	57.1878	34.4939	33.4374	19.6756	18.2657	11.093	9.57589
105.92	126.283	122.385	87.566	88.6836	56.9933	57.1878	34.4808	33.4374	19.6711	18.2657	11.0884	9.57589
106.92	126.334	122.385	87.5917	88.6836	57.0032	57.1878	34.4768	33.4374	19.6499	18.2657	11.0934	9.57589
107.92	126.366	122.385	87.6168	88.6836	56.9995	57.1878	34.4707	33.4374	19.6513	18.2657	11.0787	9.57589
108.92	126.404	122.385	87.6473	88.6836	57.0136	57.1878	34.4656	33.4374	19.6502	18.2657	11.0839	9.57589
109.92	126.464	122.385	87.6523	88.6836	56.9922	57.1878	34.4642	33.4374	19.626	18.2657	11.0757	9.57589
110.92	126.507	122.385	87.6636	88.6836	56.9834	57.1878	34.4433	33.4374	19.6031	18.2657	11.0661	9.57589
111.92	126.564	122.385	87.6566	88.6836	56.9801	57.1878	34.4407	33.4374	19.5927	18.2657	11.0374	9.57589
112.92	126.629	122.385	87.659	88.6836	56.9608	57.1878	34.4222	33.4374	19.571	18.2657	11.0241	9.57589
113.92	126.663	122.385	87.6334	88.6836	56.9546	57.1878	34.4077	33.4374	19.562	18.2657	11.0166	9.57589
114.92	126.713	122.385	87.6996	88.6836	56.9719	57.1878	34.4391	33.4374	19.586	18.2657	11.031	9.57589
115.92	126.782	122.385	87.7537	88.6836	56.9928	57.1878	34.5104	33.4374	19.6442	18.2657	11.0583	9.57589
116.92	126.814	122.385	87.6849	88.6836	56.9654	57.1878	34.4887	33.4374	19.6322	18.2657	11.0557	9.57589
117.92	126.781	122.385	87.6906	88.6836	56.9834	57.1878	34.5014	33.4374	19.7522	18.2657	11.0922	9.57589
118.92	126.735	122.385	89.3251	88.6836	58.1493	57.1878	35.3299	33.4374	20.1024	18.2657	11.4022	9.57589
119.92	129.234	122.385	74.8882	80.2262	51.8329	53.9406	30.287	30.6727	17.226	16.7555	9.5166	8.66272
120.92	105.378	107.674	64.432	69.8011	44.2222	46.9312	26.2483	26.6869	14.9991	14.5782	8.60225	7.53703
121.92	90.6769	93.6822	54.7308	60.7307	37.5356	40.8327	22.2815	23.219	12.9128	12.6838	7.46623	6.55763
122.92	77.0448	81.5086	46.749	52.839	32.0085	35.5266	19.0638	20.2018	11.0283	11.0356	6.41225	5.70549
123.92	65.8801	70.9169	40.2764	45.9728	27.5643	30.9101	16.4654	17.5767	9.58405	9.60156	5.63972	4.96408
124.92	56.5834	61.7015	34.8388	39.9988	23.7555	26.8935	14.2524	15.2927	8.41985	8.35388	4.94633	4.31902
125.92	48.835	53.6837	30.246	34.8011	20.675	23.3988	12.5124	13.3054	7.43762	7.26833	4.43628	3.75778
126.92	42.4667	46.7077	26.3824	30.2789	18.0885	20.3582	11.0178	11.5764	6.59553	6.32384	4.003	3.26947
127.92	37.0009	40.6382	23.0662	26.3442	15.8616	17.7127	9.70702	10.0721	5.83711	5.50208	3.62861	2.84462
128.92	32.4021	35.3574	20.4021	22.9209	14.0134	15.411	8.63412	8.7633	5.25058	4.78711	3.33274	2.47497
129.92	28.4474	30.7629	18.1515	19.9424	12.4018	13.4084	7.71438	7.62454	4.77573	4.16504	3.07041	2.15336
130.92	25.0602	26.7654	16.1835	17.351	11.0416	11.6661	6.9396	6.63377	4.33835	3.62381	2.89621	1.87353
131.92	22.1843	23.2873	14.4237	15.0963	9.82456	10.1501	6.25886	5.77173	4.01079	3.15291	2.62737	1.63007
132.92	19.733	20.2612	12.8719	13.1346	8.78535	8.83113	5.61398	5.02172	3.61509	2.7432	2.45395	1.41825
133.92	17.4993	17.6284	11.621	11.4278	7.97512	7.68356	5.07793	4.36917	3.34101	2.38674	2.29731	1.23395
134.92	15.708	15.3376	10.523	9.94281	7.19389	6.68512	4.65629	3.80141	3.06326	2.07659	2.14028	1.0736
135.92	14.1198	13.3446	9.60166	8.65079	6.56606	5.81641	4.28887	3.30743	2.85017	1.80674	2.02266	0.934088
136.92	12.7296	11.6105	8.7434	7.52665	6.01655	5.06059	3.99838	2.87765	2.69907	1.57196	1.95139	0.812705
137.92	11.558	10.1018	7.96355	6.54859	5.51716	4.40299	3.6647	2.50371	2.51987	1.36768	1.83054	0.707095
138.92	10.494	8.78907	7.34535	5.69763	5.08855	3.83084	3.42802	2.17836	2.38723	1.18996	1.70144	0.61521
139.92	9.64783	7.64697	6.74715	4.95725	4.64018	3.33304	3.16233	1.89529	2.27175	1.03532	1.68398	0.535264
140.92	8.78845	6.65327	6.23847	4.31307	4.27893	2.89992	2.9389	1.649	2.12524	0.900786	1.65185	0.465708
141.92	8.07739	5.78871	5.80435	3.75261	4.02951	2.52309	2.79634	1.43471	2.07366	0.78373	1.61516	0.40519
142.92	7.4447	5.03649	5.47445	3.26497	3.7573	2.19522	2.66347	1.24828	1.95757	0.681886	1.5269	0.352536
143.92	6.95471	4.38202	5.18371	2.8407	3.57514	1.90996	2.48971	1.08606	1.84531	0.593276	1.49778	0.306725
144.92	6.51489	3.81259	4.84254	2.47156	3.37798	1.66176	2.38016	0.944933	1.78445	0.516181	1.44155	0.266867
145.92	6.00061	3.31716	4.52973	2.15039	3.19543	1.44582	2.28632	0.822141	1.66858	0.449104	1.39294	0.232188
146.92	5.59192	2.88611	4.32411	1.87095	3.01763	1.25794	2.17509	0.715305	1.61221	0.390744	1.37917	0.202015
147.92	5.26172	2.51107	4.1392	1.62783	2.8301	1.09447	2.07579	0.622353	1.60029	0.339968	1.37068	0.175764
148.92	5.00208	2.18477	3.97962	1.41629	2.69104	0.952247	2.01343	0.541479	1.55713	0.29579	1.36157	0.152924
149.92	4.72937	1.90086	3.76278	1.23225	2.6135	0.828505	1.93666	0.471115	1.50261	0.257352	1.33293	0.133052
150.92	4.46252	1.65385	3.60842	1.07212	2.49839	0.720842	1.86506	0.409894	1.44316	0.22391	1.28704	0.115762
151.92	4.16663	1.43893	3.46005	0.932801	2.37815	0.62717	1.78529	0.356629	1.40019	0.194813	1.23589	0.100719
152.92	3.922	1.25195	3.33599	0.811585	2.30391	0.54567	1.73257	0.310286	1.3707	0.169498	1.1981	0.0876305
153.92	3.8158	1.08926	3.23283	0.706121	2.25771	0.474762	1.71593	0.269965	1.34785	0.147472	1.20112	0.0762431
154.92	3.70276	0.947712	3.09371	0.614362	2.18418	0.413067	1.66713	0.234884	1.31584	0.128308	1.15776	0.0663355
155.92	3.48413	0.824558	3.02149	0.534527	2.09924	0.35939	1.6427	0.204361	1.26501	0.111635	1.0874	0.0577153
156.92	3.34338	0.717409	2.91283	0.465066	2.03096	0.312688	1.57882	0.177805	1.23752	0.097128	1.04185	0.0502153
157.92	3.25684	0.624183	2.80982	0.404632	1.97644	0.272055	1.57654	0.154699	1.21265	0.0845064	1.00574	0.0436899
158.92	3.13098	0.543071	2.73169	0.352051	1.93274	0.236702	1.5813	0.134596	1.21704	0.0735249	1.00317	0.0380125
159.92	3.02783	0.4725	2.65817	0.306302	1.90024	0.205943	1.56337	0.117106	1.20708	0.0639705	0.9677	0.0330729
160.92	2.88525	0.4111	2.62981	0.266499	1.87312	0.179181	1.53909	0.101888	1.19077	0.0556577	0.981908	0.0287751
161.92	2.84814	0.357678	2.59432	0.231868	1.83567	0.155897	1.51417	0.088648	1.1834	0.0484251	1.00261	0.0250358
162.92	2.79297	0.311199	2.54166	0.201737	1.78921	0.135638	1.49254	0.0771284	1.14998	0.0421323	1.00361	0.0217825
163.92	2.73511	0.270759	2.47609	0.175522	1.75688	0.118012	1.46329	0.0671057	1.13516	0.0366573	0.991967	0.0189519
164.92	2.63049	0.235574	2.42505	0.152713	1.73047	0.102677	1.42932	0.0583854	1.13293	0.0318938	0.978271	0.0164891
165.92	2.56555	0.204962	2.36718	0.132868	1.67817	0.0893342	1.40695	0.0507983	1.11326	0.0277492	0.962133	0.0143464
166.92	2.49036	0.178328	2.28294	0.115602	1.63735	0.0777254	1.34563	0.0441972	1.09053	0.0241433	0.914502	0.0124821
167.92	2.3938	0.155154	2.23657	0.10058	1.61523	0.0676251	1.30957	0.0384539	1.06799	0.0210059	0.898559	0.0108601
168.92	2.34521	0.134992	2.21295	0.0875098	1.59729	0.0588374	1.29193	0.0334569	1.0686	0.0182762	0.892578	0.00944884
169.92	2.29065	0.11745	2.17702	0.0761381	1.58818	0.0511916	1.29447	0.0291092	1.08144	0.0159013	0.912133	0.00822098
170.92	2.25012	0.102188	2.15859	0.0662441	1.59153	0.0445393	1.30049	0.0253265	1.09282	0.0138349	0.926928	0.00715268
171.92	2.17529	0.0889087	2.1033	0.0576358	1.56931	0.0387515	1.27754	0.0220354	1.08562	0.0120371	0.890307	0.0062232
172.92	2.10474	0.0773552	2.05734	0.0501461	1.54368	0.0337158	1.27345	0.0191719	1.08538	0.0104729	0.904711	0.00541451
173.92	2.06409	0.067303	2.03024	0.0436297	1.49936	0.0293345	1.26783	0.0166806	1.06719	0.00911197	0.909106	0.0047109
174.92	1.99976	0.0585571	1.99565	0.0379601	1.47541	0.0255226	1.23965	0.014513	1.05308	0.00792789	0.90476	0.00409873
175.92	1.92004	0.0509477	1.97053	0.0330273	1.46025	0.022206	1.2219	0.012627	1.02908	0.00689767	0.882348	0.00356611
176.92	1.86951	0.0443272	1.96769	0.0287355	1.46389	0.0193203	1.21508	0.0109862	1.02522	0.00600133	0.867138	0.0031027
177.92	1.8645	0.0385669	1.94861	0.0250013	1.45398	0.0168097	1.18811	0.00955854	1.02527	0.00522147	0.867187	0.00269951
178.92	1.82849	0.0335552	1.92684	0.0217525	1.43259	0.0146253	1.18544	0.00831643	1.02983	0.00454295	0.855395	0.00234871
179.92	1.80579	0.0291948	1.88888	0.0189258	1.40867	0.0127248	1.19374	0.00723572	1.01836	0.0039526	0.850879	0.0020435
180.92	1.76953	0.025401	1.8603	0.0164664	1.39324	0.0110712	1.17283	0.00629546	1.01492	0.00343897	0.830957	0.00177795
181.92	1.74036	0.0221002	1.83937	0.0143266	1.38799	0.00963253	1.17216	0.00547737	1.01577	0.00299208	0.846338	0.00154691
182.92	1.71436	0.0192283	1.82772	0.0124649	1.37827	0.0083808	1.16456	0.0047656	1.00664	0.00260327	0.842211	0.00134589
183.92	1.68945	0.0167296	1.83051	0.0108451	1.38293	0.00729173	1.14703	0.00414632	0.992675	0.00226498	0.844482	0.001171
184.92	1.66675	0.0145556	1.81279	0.00943582	1.39888	0.00634419	1.15103	0.00360751	1.00449	0.00197065	0.854834	0.00101883
185.92	1.63867	0.0126642	1.77933	0.00820965	1.4147	0.00551977	1.13829	0.00313872	0.993115	0.00171457	0.87605	0.000886434
186.92	1.58508	0.0110185	1.76185	0.00714282	1.39824	0.00480249	1.14066	0.00273085	0.986474	0.00149176	0.869043	0.000771243
187.92	1.57666	0.00958665	1.72251	0.00621463	1.38308	0.00417841	1.13506	0.00237598	0.951733	0.00129791	0.864331	0.000671022
188.92	1.57654	0.00834088	1.70117	0.00540705	1.36169	0.00363544	1.12732	0.00206723	0.919311	0.00112925	0.852661	0.000583824
189.92	1.55066	0.007257	1.70067	0.00470441	1.34809	0.00316302	1.12753	0.0017986	0.915625	0.000982505	0.839453	0.000507957
190.92	1.5293	0.00631397	1.68099	0.00409308	1.35801	0.00275199	1.12086	0.00156487	0.917407	0.000854831	0.82146	0.000441949
191.92	1.49023	0.00549348	1.67126	0.00356119	1.34619	0.00239438	1.0863	0.00136152	0.900268	0.000743747	0.812622	0.000384519
192.92	1.46082	0.00477961	1.66785	0.00309842	1.32861	0.00208323	1.08044	0.00118459	0.914062	0.000647099	0.795288	0.000334551
193.92	1.45898	0.00415851	1.65812	0.00269579	1.32595	0.00181252	1.09874	0.00103066	0.914258	0.000563009	0.793774	0.000291077
194.92	1.46716	0.00361812	1.64251	0.00234548	1.31208	0.00157699	1.12161	0.000896726	0.914892	0.000489847	0.815527	0.000253252
195.92	1.47351	0.00314795	1.62203	0.00204069	1.28586	0.00137206	1.12282	0.000780198	0.925219	0.000426193	0.828051	0.000220342
196.92	1.47034	0.00273888	1.61337	0.0017755	1.28501	0.00119376	1.13185	0.000678813	0.934741	0.00037081	0.84038	0.000191709
197.92	1.47034	0.00238297	1.5953	0.00154478	1.28	0.00103864	1.12416	0.000590602	0.938525	0.000322624	0.841357	0.000166797
198.92	1.44446	0.00207331	1.57324	0.00134404	1.27734	0.000903667	1.1073	0.000513855	0.921387	0.000280699	0.825073	0.000145122
199.92	1.40198	0.00180389	1.55673	0.00116938	1.26694	0.000786237	1.07094	0.00044708	0.904346	0.000244223	0.815356	0.000126264
200.92	1.36255	0.00156947	1.55147	0.00101742	1.25359	0.000684067	1.05613	0.000388983	0.89541	0.000212487	0.792749	0.000109856
201.92	1.32031	0.00136552	1.54741	0.000885212	1.24446	0.000595174	1.04446	0.000338435	0.890356	0.000184874	0.783056	9.55804e-05
202.92	1.31018	0.00118808	1.51554	0.000770181	1.23391	0.000517832	1.03173	0.000294456	0.877759	0.00016085	0.780224	8.31599e-05
203.92	1.30066	0.00103369	1.52361	0.000670097	1.22602	0.000450541	1.02859	0.000256192	0.888769	0.000139948	0.791235	7.23535e-05
204.92	1.27576	0.000899363	1.52803	0.000583019	1.2227	0.000391994	1.02402	0.000222901	0.902856	0.000121762	0.805322	6.29513e-05
205.92	1.29211	0.000782492	1.53427	0.000507257	1.21226	0.000341055	1.04176	0.000193935	0.907397	0.000105939	0.800097	5.47709e-05
206.92	1.28394	0.000680809	1.55156	0.00044134	1.20698	0.000296736	1.04067	0.000168734	0.908545	9.21728e-05	0.809423	4.76535e-05
207.92	1.28235	0.000592339	1.54277	0.000383989	1.20271	0.000258175	1.04666	0.000146807	0.915869	8.01951e-05	0.811743	4.1461e-05
208.92	1.27454	0.000515366	1.53364	0.00033409	1.205	0.000224626	1.04465	0.00012773	0.907739	6.97739e-05	0.810083	3.60732e-05
209.92	1.27417	0.000448395	1.50627	0.000290676	1.19807	0.000195436	1.05789	0.000111131	0.880347	6.07069e-05	0.810156	3.13856e-05
210.92	1.25659	0.000390127	1.46387	0.000252903	1.18591	0.00017004	1.03735	9.66902e-05	0.851074	5.28182e-05	0.792602	2.73071e-05
211.92	1.22534	0.000339431	1.44882	0.000220039	1.17051	0.000147943	1.02833	8.41255e-05	0.814502	4.59546e-05	0.784106	2.37586e-05
212.92	1.19885	0.000295322	1.41724	0.000191445	1.17151	0.000128718	1.03162	7.31935e-05	0.790649	3.99829e-05	0.781494	2.06712e-05
213.92	1.18506	0.000256946	1.39518	0.000166567	1.1564	0.000111992	1.03356	6.36822e-05	0.772534	3.47872e-05	0.761426	1.7985e-05
214.92	1.14526	0.000223556	1.40398	0.000144922	1.14058	9.74386e-05	1.02566	5.54068e-05	0.768652	3.02666e-05	0.75437	1.56479e-05
215.92	1.15649	0.000194505	1.3953	0.00012609	1.13113	8.47767e-05	1.00975	4.82068e-05	0.74165	2.63336e-05	0.734204	1.36145e-05
216.92	1.13708	0.00016923	1.38292	0.000109705	1.12825	7.37601e-05	1.00668	4.19424e-05	0.73667	2.29116e-05	0.732031	1.18453e-05
217.92	1.15198	0.000147239	1.38452	9.54487e-05	1.13794	6.41751e-05	1.00476	3.64921e-05	0.746094	1.99342e-05	0.728637	1.0306e-05
218.92	1.13708	0.000128105	1.37388	8.30454e-05	1.13735	5.58357e-05	1.002	3.175e-05	0.744336	1.73438e-05	0.739819	8.96679e-06
219.92	1.16003	0.000111458	1.36825	7.22538e-05	1.1356	4.85799e-05	0.99989	2.76241e-05	0.739184	1.509e-05	0.733081	7.80157e-06
220.92	1.14832	9.69745e-05	1.35812	6.28645e-05	1.14402	4.22671e-05	0.986585	2.40344e-05	0.731128	1.31291e-05	0.721728	6.78777e-06
221.92	1.15503	8.43729e-05	1.35131	5.46954e-05	1.13923	3.67745e-05	0.988733	2.09112e-05	0.732031	1.1423e-05	0.727514	5.90571e-06
222.92	1.16162	7.34088e-05	1.37825	4.75879e-05	1.15447	3.19958e-05	0.997779	1.81938e-05	0.743676	9.93861e-06	0.72622	5.13828e-06
223.92	1.1781	6.38694e-05	1.39191	4.14039e-05	1.15112	2.7838e-05	1.00189	1.58296e-05	0.738281	8.64711e-06	0.730957	4.47057e-06
224.92	1.18079	5.55697e-05	1.40584	3.60235e-05	1.13457	2.42205e-05	1.01292	1.37726e-05	0.740991	7.52343e-06	0.748071	3.88963e-06
225.92	1.18787	4.83486e-05	1.42041	3.13424e-05	1.13135	2.10731e-05	1.01624	1.19828e-05	0.741333	6.54578e-06	0.751343	3.38418e-06
226.92	1.17615	4.20658e-05	1.42384	2.72695e-05	1.12395	1.83347e-05	1.01212	1.04257e-05	0.746484	5.69517e-06	0.760278	2.94441e-06
227.92	1.16663	3.65994e-05	1.41515	2.37259e-05	1.11946	1.59521e-05	1.0306	9.0709e-06	0.74729	4.95509e-06	0.767431	2.56179e-06
228.92	1.16956	3.18434e-05	1.42485	2.06427e-05	1.12227	1.38792e-05	1.03359	7.89215e-06	0.747168	4.31118e-06	0.780493	2.22889e-06
229.92	1.15503	2.77054e-05	1.41386	1.79602e-05	1.14175	1.20756e-05	1.03148	6.86658e-06	0.747998	3.75095e-06	0.77937	1.93925e-06
230.92	1.15198	2.41051e-05	1.40475	1.56263e-05	1.15256	1.05064e-05	1.01698	5.97428e-06	0.739429	3.26353e-06	0.772754	1.68725e-06
231.92	1.1532	2.09727e-05	1.39772	1.35957e-05	1.15825	9.14111e-06	1.01334	5.19794e-06	0.736719	2.83944e-06	0.768091	1.46799e-06
232.92	1.14392	1.82473e-05	1.41198	1.1829e-05	1.16011	7.95324e-06	1.02389	4.52247e-06	0.74729	2.47046e-06	0.768896	1.27723e-06
233.92	1.13513	1.58761e-05	1.40483	1.02918e-05	1.15742	6.91973e-06	1.03689	3.93479e-06	0.741064	2.14943e-06	0.766211	1.11126e-06
234.92	1.11914	1.38131e-05	1.38647	8.95443e-06	1.1228	6.02053e-06	1.02039	3.42347e-06	0.725708	1.87011e-06	0.745728	9.66851e-07
235.92	1.09961	1.20181e-05	1.34636	7.79082e-06	1.09517	5.23817e-06	1.0082	2.9786e-06	0.727148	1.62709e-06	0.740942	8.41211e-07
236.92	1.09631	1.04564e-05	1.30164	6.77842e-06	1.05725	4.55748e-06	0.993164	2.59153e-06	0.695679	1.41566e-06	0.705933	7.31897e-07
237.92	1.06323	9.09757e-06	1.26716	5.89758e-06	1.02288	3.96525e-06	0.981177	2.25477e-06	0.681055	1.2317e-06	0.684839	6.36788e-07
238.92	1.03589	7.91536e-06	1.25687	5.1312e-06	1.01284	3.44997e-06	0.9724	1.96177e-06	0.677685	1.07164e-06	0.698071	5.54039e-07
239.92	1.02734	6.88678e-06	1.27181	4.46441e-06	1.02097	3.00165e-06	0.977796	1.70684e-06	0.695117	9.32381e-07	0.705371	4.82043e-07
240.92	1.05701	5.99185e-06
